# Supplementary material for: Where are the inequalities in colorectal cancer care in a country with universal healthcare? A systematic review and narrative synthesis
Source: PubMed Central journal article supplement — BMJ Open. 2024 Jan 3;14(1):e080467. doi: 10.1136/bmjopen-2023-080467 (PMC10773363; doi:10.1136/bmjopen-2023-080467), 2024-01-03
Supplement: bmjopen-2023-080467.draft_revisions.pdf [file bmjopen-2023-080467.draft_revisions.pdf]

# BMJ Open

BMJ Open is committed to open peer review. As part of this commitment we make the peer review history of every article we publish publicly available.

When an article is published we post the peer reviewers' comments and the authors' responses online. We also post the versions of the paper that were used during peer review. These are the versions that the peer review comments apply to.

The versions of the paper that follow are the versions that were submitted during the peer review process. They are not the versions of record or the final published versions. They should not be cited or distributed as the published version of this manuscript.

BMJ Open is an open access journal and the full, final, typeset and author-corrected version of record of the manuscript is available on our site with no access controls, subscription charges or pay-per-view fees (<http://bmjopen.bmj.com>).

If you have any questions on BMJ Open's open peer review process please email [info.bmjopen@bmj.com](mailto:info.bmjopen@bmj.com)

# BMJ Open

## Where are the inequalities in colorectal cancer care in a country with universal healthcare? A systematic review and narrative synthesis

|                               |                                                                                                                                                                                                                                                                                                                                                                                                                      |
|-------------------------------|----------------------------------------------------------------------------------------------------------------------------------------------------------------------------------------------------------------------------------------------------------------------------------------------------------------------------------------------------------------------------------------------------------------------|
| Journal:                      | <i>BMJ Open</i>                                                                                                                                                                                                                                                                                                                                                                                                      |
| Manuscript ID                 | bmjopen-2023-080467                                                                                                                                                                                                                                                                                                                                                                                                  |
| Article Type:                 | Original research                                                                                                                                                                                                                                                                                                                                                                                                    |
| Date Submitted by the Author: | 02-Oct-2023                                                                                                                                                                                                                                                                                                                                                                                                          |
| Complete List of Authors:     | Pickwell-Smith, Benjamin ; University of Hull; Hull and East Yorkshire Hospitals NHS Trust<br>Spencer, Katie; Leeds Institute of Health Sciences University of Leeds; Leeds Teaching Hospitals NHS Trust<br>Sadeghi, Mahboobeh Haji; University of Hull<br>Greenley, Sarah; University of Hull<br>Lind, Michael; University of Hull; Hull and East Yorkshire Hospitals NHS Trust<br>Macleod, Una; University of Hull |
| Keywords:                     | SOCIAL MEDICINE, Health policy < HEALTH SERVICES ADMINISTRATION & MANAGEMENT, Adult oncology < ONCOLOGY, Epidemiology < ONCOLOGY, PUBLIC HEALTH, Systematic Review                                                                                                                                                                                                                                                   |
|                               |                                                                                                                                                                                                                                                                                                                                                                                                                      |

SCHOLARONE™  
Manuscripts

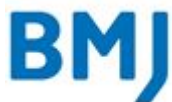

I, the Submitting Author has the right to grant and does grant on behalf of all authors of the Work (as defined in the below author licence), an exclusive licence and/or a non-exclusive licence for contributions from authors who are: i) UK Crown employees; ii) where BMJ has agreed a CC-BY licence shall apply, and/or iii) in accordance with the terms applicable for US Federal Government officers or employees acting as part of their official duties; on a worldwide, perpetual, irrevocable, royalty-free basis to BMJ Publishing Group Ltd ("BMJ") its licensees and where the relevant Journal is co-owned by BMJ to the co-owners of the Journal, to publish the Work in this journal and any other BMJ products and to exploit all rights, as set out in our [licence](#).

The Submitting Author accepts and understands that any supply made under these terms is made by BMJ to the Submitting Author unless you are acting as an employee on behalf of your employer or a postgraduate student of an affiliated institution which is paying any applicable article publishing charge ("APC") for Open Access articles. Where the Submitting Author wishes to make the Work available on an Open Access basis (and intends to pay the relevant APC), the terms of reuse of such Open Access shall be governed by a Creative Commons licence – details of these licences and which [Creative Commons](#) licence will apply to this Work are set out in our licence referred to above.

Other than as permitted in any relevant BMJ Author's Self Archiving Policies, I confirm this Work has not been accepted for publication elsewhere, is not being considered for publication elsewhere and does not duplicate material already published. I confirm all authors consent to publication of this Work and authorise the granting of this licence.

1  
2  
3 **1 Where are the inequalities in colorectal cancer care in**  
4  
5  
6 **2 a country with universal healthcare? A systematic**  
7  
8  
9  
10 **3 review and narrative synthesis**  
11  
12

13 **4 Authors**  
14

15  
16 Benjamin Pickwell-Smith<sup>1,4\*</sup>, Katie Spencer<sup>2,3</sup>, Mahboobeh Haji Sadeghi<sup>1</sup>, Sarah  
17  
18 Greenley<sup>1</sup>, Michael Lind<sup>1,4</sup> and Una Macleod<sup>1</sup>  
19  
20

21  
22 <sup>1</sup>Hull York Medical School, University of Hull, Hull, United Kingdom  
23

24  
25 <sup>2</sup>Academic Unit of Health Economics, Leeds Institute of Health Sciences, University of  
26  
27 Leeds, Leeds, United Kingdom  
28  
29

30  
31 <sup>3</sup>Leeds Cancer Centre, Leeds Teaching Hospitals NHS Trust, Leeds, United Kingdom  
32

33  
34 <sup>4</sup>Castle Hill Hospital, Hull and East Yorkshire Hospitals NHS Trust, Hull, United  
35  
36 Kingdom  
37

38 **13 Contact**  
39  
40

41  
42 \*Correspondence:  
43

44  
45 [Benjamin.Pickwell-Smith@hyms.ac.uk](mailto:Benjamin.Pickwell-Smith@hyms.ac.uk)  
46

47  
48 [07792891399](tel:07792891399)  
49

50  
51 **17 Corresponding Author ORCID Identifier**  
52

53  
54 0009-0003-1941-6444  
55  
56

57  
58  
59  
60  
19

## 1 **Abstract**

### 2 **Objective**

3 Patients diagnosed with colorectal cancer living in more deprived areas experience  
4 worse survival than those in more affluent areas. Those living in more deprived areas  
5 face barriers to accessing timely, quality healthcare. These barriers may contribute to  
6 socioeconomic inequalities in survival. We evaluated the literature for any association  
7 between socioeconomic group, hospital delay, and treatments received among patients  
8 with colorectal cancer in the United Kingdom, a country with universal healthcare.

### 9 **Design**

10 MEDLINE, EMBASE, CINAHL, CENTRAL, SCIE, AMED and PsycINFO were  
11 searched from inception to January 2023. Grey literature, including HMIC, BASE, and  
12 Google Advanced Search, and forward and backward citation searches were conducted.  
13 Two reviewers independently reviewed titles, abstracts, and full-text articles.  
14 Observational UK-based studies were included if they reported socioeconomic  
15 measures and an association with either hospital delay or treatments received. The  
16 QUIPS tool assessed bias risk, and a narrative synthesis was conducted. The review is  
17 reported to PRISMA 2020 and registered with PROSPERO [CRD42022347652].

### 18 **Results**

19 Forty-one of the 7,209 identified references were included. Twelve studies evaluated  
20 seven different hospital intervals. There was a significant association between area-level  
21 deprivation and a longer time from first presentation in primary care to diagnosis.  
22 Thirty-two studies evaluated treatments received. There were socioeconomic  
23 inequalities in surgery and chemotherapy but not radiotherapy.

### 24 **Conclusion**

1 Patients with colorectal cancer face inequalities across the cancer care continuum.  
2 Further research is needed to understand why and what evidence-based actions can  
3 reduce these inequalities in treatment. Qualitative research of patients and clinicians  
4 conducted across various settings would provide a rich understanding of the complex  
5 factors that drive these inequalities. Further research should also consider using a causal  
6 approach to future studies to considerably strengthen the interpretation. Clinicians can  
7 try and mitigate some potential causes of colorectal cancer inequalities, including  
8 signposting to financial advice and patient transport schemes.

### 9 **Trial registration**

10 PROSPERO [CRD42022347652].

### 11 **Strengths and limitations**

- 12 • The searches were extensive – conducted across eight databases, supplemented  
13 with citation searching and hand-searching websites.
- 14 • The search strategy was validated.
- 15 • The inclusion of non-peer-reviewed literature was a key strength.
- 16 • Due to heterogeneous methods, meta-analysis was not possible.

### 17 **Funding**

18 This work was funded in whole by Yorkshire Cancer Research (award reference number  
19 HEND405). Yorkshire Cancer Research has not been involved in any other aspect of the  
20 project, such as the design, data collection, analysis, or interpretation.

### 21 **Competing interests**

22 The authors declare no conflict of interest.

## 1 Introduction

2 Colorectal cancer is the second most common cause of cancer-related death in the  
3 United Kingdom (UK).(1) Survival has improved since the 1990s but lags behind  
4 comparable countries.(2) There are also survival gradients within countries, including  
5 those with universal healthcare, such as the UK and Australia.(3) In particular, patients  
6 living in more deprived areas experience significantly worse survival outcomes.(1, 3)  
7 Healthcare systems can contribute to these inequalities, as treatment differences likely  
8 compound differential outcomes across populations.(2)

9 Timely diagnosis and treatment are also essential, with delays associated with worse  
10 outcomes. The Aarhus statement suggested a framework for measuring these delays,  
11 categorising the patient journey into patient, doctor and system intervals.(4)

12 Specifically, the system interval was defined as the period from primary care-initiated  
13 investigations or referral to the commencement of treatment.(4) Socioeconomic  
14 circumstances can impact this interval and yet is comparatively under-researched.

15 Existing inequalities have been exacerbated by the COVID-19 pandemic, with  
16 vulnerable patient groups disproportionately affected by suboptimal care.(5) The  
17 evolution of precision medicine and the development of new technologies and surgical  
18 approaches will likely worsen existing inequalities, a process described as the “inverse  
19 equity law”.(6) Worryingly, disparities in access to precision oncology are already well  
20 documented.(7) Understanding where inequalities are in the pathways of care for  
21 patients with colorectal cancer is essential to inform policy and identify areas of further  
22 research to target evidence-based action.

23 We evaluated the literature for any association between socioeconomic group, system  
24 interval, and treatment amongst patients with colorectal cancer in the UK. By focusing  
25 exclusively on studies conducted within a single country with a universal healthcare

1 system, our systematic review homogenised the healthcare infrastructure, policy, and  
2 patient population, ensuring a more interpretable analysis of disparities in cancer care  
3 with greater scope for policy impact.

## 4 **Methods**

5 This systematic review was registered with PROSPERO (CRD42022347652). The  
6 review is reported according to the PRISMA 2020 statement (Appendix S1).(8)

### 7 *Eligibility criteria*

8 Published and grey-literature observational studies were considered for inclusion if  
9 relevant outcomes of patients with a primary diagnosis of colorectal cancer (ICD10  
10 C18-C20) in the UK were reported.

11 Outcomes were only included if they had been analysed by a measure of socioeconomic  
12 status [e.g., an area-based measure such as the Index of Multiple Deprivation (IMD) or  
13 individual measures such as occupation]. The relevant outcomes were defined as  
14 follows:

- 15 • The association between socioeconomic status and the length of the system interval,  
16 as defined by the Aarhus statement.(4) Any part of the system interval could have  
17 been measured.
- 18 • Or receipt of cancer-directed treatment. Studies evaluating palliative or supportive  
19 care only were excluded.

### 20 *Information sources*

21 The following bibliographic databases were searched from inception to 26/01/2023:  
22 MEDLINE, EMBASE, AMED and PsycINFO, CINAHL, CENTRAL and Science  
23 Citation Index Expanded.



1 The grey literature was searched using HMIC, BASE, NICE Evidence Search and  
2 Google Advanced Search on 26/01/2023. In addition, twelve websites were  
3 systematically hand-searched, and backwards and forward citation searches were  
4 conducted on 30/03/2023 (details in Appendix S2).

### 5 *Search strategy*

6 The search strategies are listed in Appendix S3. The search strategy was developed and  
7 validated in conjunction with SG, an information specialist (details in Appendix S4).  
8 BPS and another reviewer (MS or KS) independently screened all titles and abstracts  
9 against the pre-determined eligibility criteria. The full texts of eligible titles and  
10 abstracts were obtained and independently screened for inclusion. Conflicts were  
11 resolved by consensus.

### 12 *Data Collection Process*

13 One researcher (BPS) extracted information from the included studies, collating the  
14 relevant data onto a data extraction form. A second author (KS) checked the extracted  
15 data, and discrepancies were reconciled by consensus. The data items and effect  
16 measures that were sought for extraction are detailed in Appendix S5.

### 17 *Study risk of bias assessment*

18 Two researchers (BPS and KS) independently evaluated the study risk of bias against  
19 domains adapted from the Quality in Prognosis Studies tool (QUIPS).(9) Each domain  
20 was judged to have a high, moderate, or low risk of bias, with the evaluations collated  
21 onto a pre-prepared form (Appendix S6).

22 Risk of bias assessments informed the narrative synthesis, with greater weight given to  
23 studies with a lower risk of bias. A study's evidence was considered "strong" if there  
24 were no high risk of bias categories, "moderate" if there was a high risk of bias in one

1 category, and “weak” if there were two or more categories at high risk of bias.

2 However, studies were not excluded based on this.

### 3 *Synthesis methods*

4 A narrative synthesis was conducted, according to the synthesis without meta-analysis  
5 in systematic reviews reporting guideline.(10) An overall assessment of the association  
6 between socioeconomic status and each outcome was made, considering the consistency  
7 and strength of supporting evidence from each study. Coefficients were extracted based  
8 on multivariable models. Given the inherent methodological heterogeneity, diverse  
9 patient populations, varying measures of deprivation, and significant statistical  
10 heterogeneity observed across the included studies, a meta-analysis was deemed  
11 inappropriate as it could yield misleading or oversimplified results.

## 12 **Results**

### 13 *Study Selection*

14 The database searches yielded 7,201 studies, 214 of which were retrieved for full-text  
15 screening. An additional six studies were identified from the grey literature. Overall,  
16 forty-one studies were included (Figure 1).(11)

### 17 *Study Characteristics*

18 The characteristics of the included studies are summarised in Appendix S7. The system  
19 interval was examined in twelve studies, with seven different time points evaluated,  
20 summarised in Figure 2.(12-23) Fifteen studies reported the receipt of surgery,(19, 20,  
21 24-36) seven studies evaluated surgical variation,(37-43) fourteen studies reported the  
22 receipt of chemotherapy,(19, 20, 24-27, 44-51) seven reported the receipt of  
23 radiotherapy,(19, 20, 25-27, 43, 52) and two reported the receipt of any treatment.(17,  
24 46)

1 Thirty-two of the forty-one studies adjusted or stratified for at least one other factor.(12-  
2 26, 32-41, 44-49, 51) The remaining nine studies provided unadjusted rates.(27-31, 42,  
3 43, 50, 52)

#### 4 *Risk of bias in studies*

5 Assessments of the risk of bias are summarised in Figure 3 and Appendix S6. The  
6 domain most at risk of bias was study confounding, with sixteen studies at high risk of  
7 bias.(13, 27-31, 39-43, 47-50, 52) Although some of these studies conducted adjusted  
8 analyses, important factors such as stage were unaccounted for.

#### 9 **Results of studies reporting variations in the system interval**

##### 10 *Referral to first-seen interval*

11 Three studies evaluated the referral to first-seen interval.(13, 15, 18) Two studies  
12 estimated the odds of being seen by a specialist within two weeks of referral; one  
13 demonstrated reduced unadjusted odds (OR 0.80),(18) while there was no significant  
14 association in the other (OR 0.95) after adjusting for age, stage and site (colon vs  
15 rectal).(15) (Appendix S8)

16 Another study used generalised linear modelling to estimate the association between  
17 occupation and the number of days to see a specialist after referral, adjusting for age,  
18 marital status and ethnicity.(13) This study reported no significant association.(13)  
19 Overall, the evidence was inconclusive for an association between deprivation and the  
20 referral to first-seen interval. (Table 1; Appendix S8)

##### 21 *First seen to diagnosis interval*

22 One study estimated the association between occupation and the number of days from  
23 the first hospital appointment to communication of diagnosis.(13) A significant

1 association was demonstrated ( $p=0.028$ ), but no magnitude or direction of effect was  
2 provided. The evidence was, therefore, inconclusive. (Table 1; Appendix S8)

### 3 *Diagnosis to treatment interval*

4 Five studies evaluated the diagnosis to treatment interval.(14-18) Two estimated the  
5 number of days from diagnosis to major surgery, adjusting for; stage, sex, age, grade  
6 and morphology.(14, 16) No significant associations were demonstrated. (Appendix S8)

7 Two studies evaluated the likelihood of commencing treatment within 31 days from the  
8 date a treatment plan was agreed upon.(15, 18) One study demonstrated increased  
9 unadjusted odds (OR 1.28),(18) while the other presented reduced adjusted odds of  
10 patients from the most deprived areas commencing treatment within 31 days (OR  
11 0.91).(15) (Appendix S8)

12 Another study calculated the likelihood of treatment for the most deprived quintile  
13 across several time points. They demonstrated reduced adjusted odds of treatment  
14 within one week (OR 0.78), one month (OR 0.84) and two to three months (OR 0.91)  
15 but non-reduced odds at four to six months (OR 1.07) after the first contact with the  
16 health system.(17) (Appendix S8)

17 Overall, the evidence for an association between deprivation and length of the diagnosis  
18 to treatment interval was inconclusive. (Table 1; Appendix S8)

### 19 *Test to diagnosis interval / secondary care diagnostic interval*

20 One study evaluated the secondary care diagnostic interval (SCDI), defined as the  
21 period between the date of the first interaction with secondary care to the date of  
22 diagnosis.(12) This study evaluated the factors associated with an interval greater than  
23 the median, adjusting for sex, age, stage, comorbidities, ethnicity, route to diagnosis and

1 additional diagnostic tests.(12) The odds of a longer interval were not significantly  
2 increased for patients from the most deprived quintile (OR 1.07). (Appendix S8)  
3  
4 Another study evaluated the time from the first investigation to cancer diagnosis.(23)  
5 The authors conducted quantile regression, adjusting for age, comorbidities, sex, test  
6 type and symptom category, focussing on the median and 75<sup>th</sup> centiles.(23) There was  
7 no significant association between deprivation and interval length. (Appendix S8)  
8  
9 Overall, there was no evidence of a prolonged SCDI or test-to-diagnosis interval for  
10 patients from the most deprived background. (Table 1; Appendix S8)

### 11 *First presentation to diagnosis interval*

12 Three studies evaluated the time from the first symptom or feature of colorectal cancer  
13 in primary care records to diagnosis.(21-23) One study demonstrated an association  
14 between deprivation and a longer interval in two of three econometric analyses.(21) The  
15 other two studies conducted quantile regression, focusing on the median and 75<sup>th</sup>  
16 centiles, adjusting for age, comorbidities, sex and type of symptom.(22, 23) Both  
17 studies demonstrated an association between the most deprived quintile and a longer  
18 first presentation to diagnosis interval for patients with colon cancer (e.g. adjusted  
19 median interval of 204 versus 126 days).(22) Meanwhile, there was no such association  
20 among patients with rectal cancer,(23) possibly reflecting that patients with rectal  
21 cancer are more likely to present with localising symptoms. (Appendix S8)

22 Overall, three robust studies provided evidence that patients from the most deprived  
23 quintile experienced a longer first presentation to diagnosis interval. (Table 1; Appendix  
24 S8)

### 25 *Symptom to diagnosis interval*

1 One study estimated the effect of occupation on the time between a patient's first  
2 symptom and diagnosis.(13) No significant effect was demonstrated, adjusting for  
3 ethnicity, age, marital status and sex.(13) (Table 1; Appendix S8)

#### 4 *Referral to treatment interval*

5 Four studies evaluated the time from referral to treatment.(15, 18-20) Two studies  
6 demonstrated no significant association between deprivation and the likelihood of  
7 commencing treatment within 62 days of referral (range of ORs 1.02-1.07).(18, 19)  
8 Another study demonstrated reduced odds of patients commencing treatment within 62  
9 days of referral, adjusted for age, stage, referral interval and first treatment received  
10 (OR 0.82).(15) (Appendix S8)

11 Meanwhile, one study estimated hazard ratios for the time between referral and first  
12 treatment, adjusting for stage, distance and presentation.(20) There was no significant  
13 association between deprivation and time to treatment (HR 1.24). (Appendix S8)

14 Overall, the association between deprivation and this interval was inconclusive. (Table  
15 1; Appendix S8)

### 16 **Results of studies reporting treatment inequalities**

#### 17 *Results of studies reporting likelihood of receipt of primary surgery*

18 The outcome of interest was primary surgery in eleven studies, here defined as resection  
19 of the tumour.(19, 20, 24-31, 36) Five studies clearly defined the outcome as a tumour  
20 resection,(25, 27-29, 36) while the received surgical procedure was not identified in the  
21 other six studies.(19, 20, 24, 26, 30, 31) (Appendix S9)

22 Across seven studies, adjustment was made for different factors: age,(19, 20, 24-26, 29,  
23 36) stage,(19, 20, 24-26, 36) sex,(19, 24-26, 29, 36) comorbidity,(24, 25, 36) site (colon  
24 vs rectum),(19, 25, 36) distance or time to hospital,(20, 26) year of diagnosis,(24, 36)

1 region,(19) and histology, grade and presentation.(36) Meanwhile, four studies provided  
2 only rates of patients receiving surgery.(27, 28, 30, 31) (Appendix S9)  
3 Six studies presented reduced odds of surgery for patients from the most deprived  
4 background (range of ORs 0.32-0.99).(24, 26-28, 30, 31) One study presented increased  
5 odds of *not* receiving surgery amongst the most deprived patients with rectal cancer  
6 (OR 1.35) but no significant association among patients with colon cancer (OR  
7 0.96).(36) Meanwhile, one study presented increased odds of surgery for patients from  
8 the most deprived background (OR 1.63),(25) and three studies demonstrated no  
9 association (range of ORs 0.52-0.88).(19, 20, 29) Overall, there was moderate evidence  
10 of the effect of deprivation due to a lack of consistent effect across the mixed-strength  
11 studies. (Table 1; Appendix S9)

#### 12 *Results of studies reporting likelihood of receipt of surgery for oligometastatic disease*

13 Four studies examined the receipt of surgery in presumed oligometastatic disease, all  
14 adjusted for age, stage, comorbidity, and site (colon vs. rectal).(32-35) Three studies  
15 examined the receipt of liver resection, demonstrating significantly reduced odds of  
16 resection for patients from the most deprived group (range of ORs 0.70-0.76).(32-34)  
17 One study examined the receipt of pulmonary resection, with no significant association  
18 demonstrated between deprivation and the likelihood of resection (OR 1.04).(35) (Table  
19 1; Appendix S9)

#### 20 *Results of studies reporting likelihood of surgical variation*

21 Seven studies evaluated variations in surgery.(37-43) Six reported rates or odds of  
22 abdominoperineal resection (APER) or anterior resection (AR).(37-42) Five studies  
23 adjusted for important variables, including age,(37-40) sex,(37-41) stage,(37, 38) year  
24 of diagnosis or resection,(37-41) surgeon workload,(37, 38) and admission type.(37-40)  
25 Five of the seven studies demonstrated that APER was significantly more likely than

1 AR for patients from the most deprived areas (range of ORs 1.37-1.64).(37, 39-42)  
2 (Table 1; Appendix S10)

3 Meanwhile, one study of 120 patients presented unadjusted rates of total pelvic  
4 exenteration (TPE) compared with partial pelvic exenteration (PPE).(43) There was a  
5 non-significant association between deprivation and the unadjusted odds of TPE (OR  
6 1.75). (Table 1; Appendix S10)

### 7 *Results of studies reporting likelihood of receipt of chemotherapy*

8 Thirteen studies examined whether patients received any chemotherapy,(19, 20, 24-27,  
9 44-50) eleven of which conducted adjusted analyses.(19, 20, 24-26, 44-49) Six studies  
10 evaluated the use of adjuvant chemotherapy.(24, 44, 45, 49-51) Two studies evaluated  
11 the use of palliative chemotherapy.(24, 46) Meanwhile, the intent of chemotherapy was  
12 unknown in the remaining seven studies.(19, 20, 25-27, 47, 48)

13 Eight studies demonstrated reduced adjusted odds of chemotherapy for patients from the  
14 most deprived group (range of ORs 0.44-0.99).(19, 24-26, 44, 45, 47, 48) One study  
15 demonstrated reduced adjusted odds for patients from the most deprived group with  
16 colon (OR 0.45) but not rectal cancer (OR 0.73).(46) Two studies did not show a  
17 significant association between deprivation and receipt of chemotherapy (range of ORs  
18 0.49-2.13).(20, 49) (Appendix S11)

19 Meanwhile, two studies presented unadjusted rates.(27, 50) One demonstrated reduced  
20 odds of chemotherapy for the most deprived patients with colorectal cancer (OR  
21 0.31).(50) The other demonstrated reduced odds of chemotherapy for the most deprived  
22 patients with colon (OR 0.85) but not rectal cancer (OR 1.03).(27) (Appendix S11)  
23 One study examined the receipt of combination versus single-agent chemotherapy,  
24 adjusting for age, sex, ethnicity, tumour size, lymph node yield and year of



1 diagnosis.(51) However, no adjustment was made for co-morbidity. Patients from the  
2 most deprived area had significantly reduced odds of receiving combination  
3 chemotherapy (OR 0.50).(51) (Appendix S11)

4 Five of the six studies evaluating the use of adjuvant chemotherapy demonstrated  
5 inequalities.(24, 44, 45, 50, 51) Meanwhile, both studies evaluating the use of palliative  
6 chemotherapy demonstrated similar inequalities.(24, 46) Overall, the evidence  
7 supported the hypothesis that patients from the most deprived group are less likely to  
8 receive chemotherapy or combination adjuvant chemotherapy. (Table 1; Appendix S11)

#### 9 *Results of studies reporting likelihood of receipt of radiotherapy*

10 Seven studies reported receipt of radiotherapy by socioeconomic group.(19, 20, 25-27,  
11 43, 52) Two studies evaluated the use of neoadjuvant radiotherapy.(19, 43) One study  
12 evaluated patterns of pre and post-operative radiotherapy.(52) The intent of  
13 radiotherapy was unknown in four studies.(20, 25-27)

14 Three studies conducted analyses that adjusted for important factors, including; age,(20,  
15 25, 26) stage,(20, 25, 26) sex,(25, 26) distance or journey time,(20, 26) tumour site  
16 (colon vs rectum),(20) and comorbidity.(25) None of these studies demonstrated a  
17 significant association between deprivation group and radiotherapy (range of ORs 0.85-  
18 0.99). The remaining four studies reported unadjusted rates of radiotherapy.(19, 27, 43,  
19 52) Two of these studies demonstrated increased odds of radiotherapy for patients from  
20 the most deprived group (range of ORs 1.33-1.39).(27, 52) The other two studies looked  
21 at rates of neoadjuvant radiotherapy specifically and did not show a significant  
22 association between deprivation and odds of treatment (range of ORs 1.00-1.15).(19,  
23 43) (Appendix S12)

24 Overall, there was no evidence to support an association between socioeconomic status  
25 and receipt of radiotherapy. (Table 1; Appendix S12) This conclusion may depend on

1 the intent of radiotherapy and would, therefore, have been stronger if all outcomes were  
2 differentiated by intent (e.g. neoadjuvant or palliative).

3 *Results of studies reporting receipt of any treatment*

4 Two studies evaluated the likelihood of any treatment by deprivation quintile, adjusting  
5 for age,(17, 46) sex(46) and stage.(17, 46) It was assumed this meant receiving surgery,  
6 radiotherapy, or chemotherapy. However, these outcomes needed to be more clearly  
7 defined. Both studies reported significantly reduced odds of any treatment within six  
8 months of diagnosis(46) or six months of the first contact with the NHS (range of ORs  
9 0.54-0.87).(17) (Table 1; Appendix S13)

10

| Specific outcome reported                              | Overall assessment/conclusion                                                                      | No. studies (no. subjects) | Studies demonstrating adverse effect of deprivation | Studies demonstrating protective effect of deprivation | Studies demonstrating no impact of deprivation | Further information                                                         |
|--------------------------------------------------------|----------------------------------------------------------------------------------------------------|----------------------------|-----------------------------------------------------|--------------------------------------------------------|------------------------------------------------|-----------------------------------------------------------------------------|
| Referral to first seen interval                        | Inconclusive impact of deprivation on the length of the referral to first seen interval            | 3 (86,644)                 | 1 Strong(18)                                        | -                                                      | 1 Strong(15)<br>1 Weak(13)                     | Appendix S8: Results of studies reporting variations in the system interval |
| First seen to diagnosis interval                       | Inconclusive impact of deprivation on the length of the first seen to diagnosis interval           | 1 (15,891)                 | -                                                   | 1 Weak(13)                                             | -                                              |                                                                             |
| Referral to treatment interval                         | Inconclusive impact of deprivation on the length of the referral to treatment interval             | 4 (69,892)                 | 1 Strong(15)                                        | -                                                      | 1 Strong(18)<br>2 Weak(19, 20)                 |                                                                             |
| Diagnosis to treatment interval                        | Inconclusive impact of deprivation on the length of the diagnosis to treatment interval            | 5 (292,502)                | 1 Strong(15)<br>1 Moderate(17)                      | 1 Strong(18)                                           | 2 Strong(14, 16)                               |                                                                             |
| Test to diagnosis / secondary care diagnostic interval | No impact of deprivation on the length of the test to diagnosis/secondary care diagnostic interval | 2 (68,794)                 | -                                                   | -                                                      | 2 Strong(12, 23)                               |                                                                             |
| First presentation to diagnosis interval               | Deprivation associated with increased length of the first presentation to diagnosis interval       | 3 (at least 6,951)         | 3 Strong*(21-23)                                    | -                                                      | 1 Strong*(23)                                  |                                                                             |
| Symptom to diagnosis interval                          | Inconclusive impact of deprivation on the length of the symptom to diagnosis interval              | 1 (15,891)                 | -                                                   | -                                                      | 1 Weak(13)                                     |                                                                             |

1 Table 1: Narrative synthesis – assessment of the relationship between deprivation, the system interval and treatment received

2

| Specific outcome reported                         | Overall assessment/conclusion                                                           | No. studies (no. subjects) | Studies demonstrating adverse effect of deprivation                            | Studies demonstrating protective effect of deprivation | Studies demonstrating no impact of deprivation | Further information                                            |
|---------------------------------------------------|-----------------------------------------------------------------------------------------|----------------------------|--------------------------------------------------------------------------------|--------------------------------------------------------|------------------------------------------------|----------------------------------------------------------------|
| Likelihood of receipt of surgery                  | Moderate evidence for reduced surgery with increasing deprivation.                      | 11 (374,869)               | 2 Strong*(24, 36)<br>1 Moderate(27)<br>4 Weak(26, 28, 30, 31)                  | 1 Strong(25)                                           | 1 Strong*(36)<br>3 Weak(19, 20, 29)            | Appendix S9: Results – Likelihood of receipt of surgery        |
| Likelihood of receipt of liver resection          | Strong evidence for reduced liver resection with increasing deprivation                 | 3 (285,194)                | 3 Strong(32-34)                                                                | -                                                      | -                                              | Appendix S9: Results – Likelihood of receipt of surgery        |
| Likelihood of receipt of pulmonary resection      | No impact of deprivation on likelihood of pulmonary resection                           | 1 (80,869)                 | -                                                                              | -                                                      | 1 Strong(35)                                   | Appendix S9: Results – Likelihood of receipt of surgery        |
| Likelihood of receipt of APER                     | Strong evidence for increased likelihood of APER vs. AR with increasing deprivation     | 6 (128,946)                | 1 Strong(37)<br>4 Weak(39-42)                                                  | -                                                      | 1 Weak(38)                                     | Appendix S10: Results – Likelihood of surgical variation       |
| Likelihood of receipt of TPE                      | No impact of deprivation on likelihood of TPE vs. PPE with increasing deprivation       | 1 (120)                    | -                                                                              | -                                                      | 1 Weak(43)                                     | Appendix S10: Results – Likelihood of surgical variation       |
| Likelihood of receipt of chemotherapy             | Strong evidence for reduced chemotherapy with increasing deprivation                    | 13 (251,862)               | 4 Strong(24, 25, 44, 45)<br>2 Moderate*(27, 47)<br>5 Weak*(19, 26, 46, 48, 50) | -                                                      | 1 Moderate*(27)<br>3 Weak*(20, 46, 49)         | Appendix S11: Results – Likelihood of receipt of chemotherapy  |
| Likelihood of receipt of combination chemotherapy | Strong evidence for reduced use of combination chemotherapy with increasing deprivation | 1 (8,750)                  | 1 Strong(51)                                                                   | -                                                      | -                                              | Appendix S11: Results – Likelihood of receipt of chemotherapy  |
| Likelihood of receipt of radiotherapy             | No impact of deprivation on likelihood of radiotherapy                                  | 7 (79,053)                 | -                                                                              | 1 Moderate(27)<br>1 Weak(52)                           | 1 Strong(25)<br>4 Weak(19, 20, 26, 43)         | Appendix S12: Results – Likelihood of receipt of radiotherapy  |
| Likelihood of receipt of any treatment            | Moderate evidence for reduced any treatment with increasing deprivation                 | 2 (90,138)                 | 1 Moderate(17)<br>1 Weak(46)                                                   | -                                                      | -                                              | Appendix S13: Results – Likelihood of receipt of any treatment |

1 Table 1: Narrative synthesis – assessment of the relationship between deprivation, the system interval and treatment received - CONTINUED

2 \*Studies represented in more than one column due to different conclusions depending on the underlying cancer type (colon vs. rectal cancer).(23, 27, 36, 46)

## 1 **Discussion**

### 2 *Main Findings*

3 This is the first systematic review to evaluate what is already known about the  
4 relationship between socioeconomic status, the system interval, and the treatment that  
5 patients with colorectal cancer receive.

### 6 *Diagnostic and treatment delays*

7 There were seven intervals evaluated. The evidence for system delays was generally  
8 inconclusive, given substantial heterogeneity in methods and outcomes. However, there  
9 was substantial evidence that the first presentation to diagnosis interval was longer for  
10 patients from the most deprived background, depending on the underlying site. The  
11 underlying reasons require further elucidation using qualitative studies. This would help  
12 us understand the extent to which these delays are driven by patient or healthcare factors  
13 and how these can be addressed. Possible causes include missed appointments due to  
14 competing demands such as employment or care responsibilities. (53, 54) Other reasons  
15 might include complex transport and travel arrangements causing difficulties in  
16 attending appointments. (53, 54)

### 17 *Surgery in the management of colorectal cancer*

18 There was moderate evidence for inequalities in primary surgery. However, most  
19 studies had limitations; few adjusted for stage, most combined colon and rectal cancers,  
20 and many included patients diagnosed before 2010.

21 However, there was strong and consistent evidence that patients from the most deprived  
22 areas were less likely to undergo a liver resection and were more likely to undergo an  
23 APER than anterior resection. APER is associated with a worse quality of life and is  
24 generally considered less preferable if a less deforming surgery is possible.

1  
2 1 Despite adjustment, socioeconomic inequalities were frequently observed. This suggests  
3  
4 2 the presence of uncaptured factors such as co-morbidity or frailty. There may also have  
5  
6 3 been variations in access to specialist care, financial and employment factors, patient  
7  
8 4 choice, health-seeking behaviours and health literacy, all of which warrant further  
9  
10 5 investigation.(55-57)

#### 6 *Chemotherapy in the management of colorectal cancer*

7 There was strong evidence that patients from more deprived areas were less likely to  
8 receive chemotherapy or combination adjuvant chemotherapy. Trust in clinicians,  
9 financial and employment factors, social support, adequate communication and  
10 provision of information are critical in influencing the use of chemotherapy.(58-61)  
11 These, amongst other uncaptured factors such as comorbidity or frailty, could be  
12 responsible for the observed inequalities.

#### 13 *Radiotherapy in the management of rectal cancer*

14 There was no evidence that patients from more deprived areas were less likely to  
15 receive radiotherapy. The absence of observed inequalities could reflect the nature of  
16 this outpatient treatment and the availability of patient transport. This is compared with,  
17 for example, surgery, which necessitates hospital admission and prolonged time away  
18 from work and social support. A lung cancer study similarly demonstrated a greater  
19 likelihood of radiotherapy but a reduced likelihood of surgery amongst less affluent  
20 patients.(62)

#### 21 **Strengths and weaknesses**

22 This systematic review identified many studies and employed a robust methodology.  
23 The process of identifying search terms was thorough, and the search was validated.  
24 The searches were extensive, conducted across eight databases, supplemented with  
25 citation searching and a thorough examination of the grey literature. These additional

1 search methods identified six studies.(27, 28, 35, 36, 44, 52) Inclusion of non-peer-  
2 reviewed literature was also a key strength of this review.(25, 27, 28, 36)  
3 The included studies were, however, heterogeneous in the methodology and populations  
4 studied. Out of forty-one studies, only fifteen included patients diagnosed after  
5 2010.(12, 14, 18, 21-23, 27, 32, 33, 35, 36, 43-45, 51) Of the six studies evaluating the  
6 system interval in patients diagnosed since 2010, four demonstrated some  
7 inequalities.(18, 21-23) Meanwhile, seven out of the nine studies that evaluated  
8 inequalities in treatments amongst patients diagnosed after 2010 demonstrated the  
9 presence of inequalities.(27, 32, 33, 36, 44, 45, 51) Therefore, although most studies  
10 included patients from over a decade ago, inequalities persisted in recent cohorts despite  
11 a national focus on reducing inequalities.

12 Another limitation was that studies frequently analysed colorectal cancer as a single  
13 disease despite differences in presentation and management. Significantly, no study  
14 utilised causal inference approaches, exemplified by an absence of reported directed  
15 acyclic graphs.(63) The methods used could have introduced a bias known as the “table  
16 2 fallacy”, whereby estimates from regression models are mistakenly interpreted.(63)  
17 Using a causal approach to future studies would considerably strengthen the  
18 interpretation and, thus, meaningfully impact policy.(64)

### 19 **Implications for policy and practice**

20 Due to significant heterogeneity across studies, we could not firmly conclude whether  
21 patients from more deprived backgrounds systematically experience longer system  
22 intervals. However, COVID-19 detrimentally impacted cancer diagnostic activity for  
23 most patients, especially those in deprived areas.(5) It is important to ensure measures  
24 are in place to monitor the system interval for patients most at risk of delays.(5)

1  
2  
3  
4  
5  
6  
7  
8  
9  
10  
11  
12  
13  
14  
15  
16  
17  
18  
19  
20  
21  
22  
23  
24  
25  
26  
27  
28  
29  
30  
31  
32  
33  
34  
35  
36  
37  
38  
39  
40  
41  
42  
43  
44  
45  
46  
47  
48  
49  
50  
51  
52  
53  
54  
55  
56  
57  
58  
59  
60

1 There was moderate evidence of socioeconomic inequalities in surgery and strong  
2 evidence for inequalities in chemotherapy. Some inequalities may partly be due to  
3 wording in clinical guidelines. For example, the National Institute for Health and Care  
4 Excellence advises that primary surgery for colorectal cancer is “offered” (a strong  
5 recommendation); the same guideline advises liver resection be “considered” (less  
6 certain benefit).(65) Similarly, adjuvant chemotherapy can be estimated to reduce the  
7 risk of death in stage III disease by 10-15%. However, there is a significant risk of long-  
8 term toxicity. Patients must carefully weigh the potential harms and benefits of these  
9 less strongly recommended treatments. Shared-decision making is vital. Inequalities  
10 will result when some patients experience better shared-decision making and can cover  
11 the costs of additional treatment, such as time off work.(66)

12 Clinicians can mitigate some of the effects of deprivation. Such strategies may include  
13 referring patients for pre-rehabilitation, tailored communication, and ensuring patients  
14 are aware of appropriate financial support and transport schemes.(66)

15 Further studies are needed to evaluate for inequalities in novel treatments. In the era of  
16 precision oncology and an ever-increasing armamentarium of novel treatments, the  
17 marginal benefits of new therapies mustn’t just be experienced by the most affluent. A  
18 prostate cancer study exemplified this, demonstrating that patients from more deprived  
19 backgrounds living at greater distances from specialist centres were significantly less  
20 likely to receive robotic prostatectomy.(67) If we accept the benefit of newer surgical  
21 technology and techniques, such as robotic surgery, these should be available for all  
22 patients no matter where they live.

### 23 **Future research**

24 Further research evaluating the whole of the system interval is needed. Further research  
25 should also aim to understand why deprivation is associated with a reduced likelihood



1 of chemotherapy and surgery. In particular, observational research of recent cohorts  
2 should utilise causal inference. Beyond this, qualitative research will be of great value  
3 in gaining a richer insight into the causes and drivers of these inequalities.

#### 4 **Conclusions**

5 Despite a healthcare system that provides free healthcare at the point of access, there  
6 were unexplained socioeconomic inequalities in surgery, chemotherapy and aspects of  
7 the system interval. Further research is needed to understand the variations in treatment  
8 between socioeconomic groups.

9 Differences in patient selection for treatment have been linked with worse colorectal  
10 cancer survival within and between countries, with evidence of improved outcomes  
11 when care is aligned with optimal pathways.(68) Eliminating inequalities could narrow  
12 survival gaps within and between countries. These findings will interest policymakers,  
13 clinicians and researchers worldwide, as inequalities in cancer care and outcomes of  
14 different socioeconomic groups have been recognised across healthcare jurisdictions.

#### 15 **Additional Information**

#### 16 **Acknowledgements**

17 Not applicable.

#### 18 **Authors' Contributions**

19 BPS – conceptualisation, developed search strategy, screening, data curation and formal  
20 analysis, project administration and writing – original draft.

21 KS – conceptualisation, screening, data curation and formal analysis, review of the  
22 manuscript

23 MS – screening and review of the manuscript

1 SG – developed the search strategy and manuscript review.

2 ML – conceptualisation, supervision, review of the manuscript

3 UM – conceptualisation, developed search strategy, screening, data curation and formal  
4 analysis, supervision, and manuscript review.

### 5 **Ethics Approval and Consent to Participate**

6 This systematic review synthesises previously published data and does not include new  
7 data that requires ethical approval and consent.

### 8 **Consent for Publication**

9 Not applicable.

### 10 **Data Availability**

11 This published article and its supplementary information files include all data generated  
12 or analysed during this study.

### 13 **Competing Interests**

14 The authors declare no conflict of interest.

15

## References

1. Cancer Research UK. Bowel cancer statistics: Bowel cancer mortality. Online [Available from: <https://www.cancerresearchuk.org/health-professional/cancer-statistics/statistics-by-cancer-type/bowel-cancer#heading-Zero>].
2. Araghi M, Arnold M, Rutherford MJ, Guren MG, Cabasag CJ, Bardot A, et al. Colon and rectal cancer survival in seven high-income countries 2010–2014: variation by age and stage at diagnosis (the ICBP SURVMARK-2 project). *Gut*. 2020;gutjnl-2020-320625.
3. Afshar N, English DR, Blakely T, Thursfield V, Farrugia H, Giles GG, et al. Differences in cancer survival by area-level socio-economic disadvantage: A population-based study using cancer registry data. *PLOS ONE*. 2020;15(1):e0228551.
4. Weller D, Vedsted P, Rubin G, Walter FM, Emery J, Scott S, et al. The Aarhus statement: improving design and reporting of studies on early cancer diagnosis. *British Journal of Cancer*. 2012;106(7):1262-7.
5. Watt T, Sullivan R, Aggarwal A. Primary care and cancer: an analysis of the impact and inequalities of the COVID-19 pandemic on patient pathways. *BMJ Open*. 2022;12(3):e059374.
6. Lyratzopoulos G, Barbiere JM, Rachet B, Baum M, Thompson MR, Coleman MP. Changes over time in socioeconomic inequalities in breast and rectal cancer survival in England and Wales during a 32-year period (1973–2004): the potential role of health care. *Annals of Oncology*. 2011;22(7):1661-6.
7. Martin AR, Kanai M, Kamatani Y, Okada Y, Neale BM, Daly MJ. Clinical use of current polygenic risk scores may exacerbate health disparities. *Nature Genetics*. 2019;51(4):584-91.
8. Page MJ, McKenzie JE, Bossuyt PM, Boutron I, Hoffmann TC, Mulrow CD, et al. The PRISMA 2020 statement: an updated guideline for reporting systematic reviews. *BMJ*. 2021;372:n71.
9. Hayden JA, van der Windt DA, Cartwright JL, Côté P, Bombardier C. Assessing Bias in Studies of Prognostic Factors. *Annals of Internal Medicine*. 2013;158(4):280-6.
10. Campbell M, McKenzie JE, Sowden A, Katikireddi SV, Brennan SE, Ellis S, et al. Synthesis without meta-analysis (SWiM) in systematic reviews: reporting guideline. *BMJ*. 2020;368:l6890.
11. Haddaway NR, Page MJ, Pritchard CC, McGuinness LA. PRISMA2020: An R package and Shiny app for producing PRISMA 2020-compliant flow diagrams, with interactivity for optimised digital transparency and Open Synthesis. *Campbell Systematic Reviews*. 2022;18(2):e1230.
12. Pearson C, Fraser J, Peake M, Valori R, Poirier V, Coupland VH, et al. Establishing population-based surveillance of diagnostic timeliness using linked cancer registry and administrative data for patients with colorectal and lung cancer. *Cancer Epidemiology*. 2019;61:111-8.
13. Neal RD, Allgar VL. Sociodemographic factors and delays in the diagnosis of six cancers: analysis of data from the ‘National Survey of NHS Patients: Cancer’. *British Journal of Cancer*. 2005;92(11):1971-5.
14. Saito MK, Quresma M, Fowler H, Majano SB, Rachet B. Exploring socioeconomic differences in surgery and in time to elective surgery for colon cancer in England: Population-based study. *Cancer Epidemiology*. 2021;71:101896.
15. Hayes L, Adams J, McCallum I, Forrest L, Hidajat M, White M, et al. Age-related and socioeconomic inequalities in timeliness of referral and start of treatment in colorectal cancer: a population-based analysis. *Journal of Epidemiology and Community Health*. 2021;75(1):1.

- 1  
2  
3  
4  
5  
6  
7  
8  
9  
10  
11  
12  
13  
14  
15  
16  
17  
18  
19  
20  
21  
22  
23  
24  
25  
26  
27  
28  
29  
30  
31  
32  
33  
34  
35  
36  
37  
38  
39  
40  
41  
42  
43  
44  
45  
46  
47  
48  
49  
50  
51  
52  
53  
54  
55  
56  
57  
58  
59  
60
16. Redaniel M, Martin R, Blazeby J, Wade J, Jeffreys M. The association of time between diagnosis and major resection with poorer colorectal cancer survival: a retrospective cohort study. *BMC Cancer*. 2014;14.
  17. Lejeune C, Sassi F, Ellis L, Godward S, Mak V, Day M, et al. Socio-economic disparities in access to treatment and their impact on colorectal cancer survival. *International Journal of Epidemiology*. 2010;39(3):710-7.
  18. Di Girolamo C, Walters S, Gildea C, Benitez Majano S, Rachet B, Morris M. Can we assess Cancer Waiting Time targets with cancer survival? A population-based study of individually linked data from the National Cancer Waiting Times monitoring dataset in England, 2009-2013. *PLOS ONE*. 2018;13(8):e0201288.
  19. Paterson HM, Mander BJ, Muir P, Phillips HA, Wild SH. Deprivation and access to treatment for colorectal cancer in southeast Scotland 2003–2009. *Colorectal Disease*. 2014;16(2):O51-O7.
  20. Campbell NC, Elliott AM, Sharp L, Ritchie LD, Cassidy J, Little J. Impact of deprivation and rural residence on treatment of colorectal and lung cancer. *British Journal of Cancer*. 2002;87(6):585-90.
  21. Price S, Zhang X, Spencer A. Measuring the impact of national guidelines: What methods can be used to uncover time-varying effects for healthcare evaluations? *Social Science & Medicine*. 2020;258:113021.
  22. Benitez Majano S, Lyratzopoulos G, de Wit NJ, White B, Rachet B, Helsper C, et al. Mental Health Morbidities and Time to Cancer Diagnosis Among Adults With Colon Cancer in England. *JAMA Network Open*. 2022;5(10):e2238569-e.
  23. Majano SB, Lyratzopoulos G, Rachet B, de Wit NJ, Renzi C. Do presenting symptoms, use of pre-diagnostic endoscopy and risk of emergency cancer diagnosis vary by comorbidity burden and type in patients with colorectal cancer? *British Journal of Cancer*. 2022;126(4):652-63.
  24. Hayes L, Forrest L, Adams J, Hidajat M, Ben-Shlomo Y, White M, et al. Age-related inequalities in colon cancer treatment persist over time: a population-based analysis. *Journal of Epidemiology and Community Health*. 2019;73(1):34.
  25. Shack L. What factors influence socioeconomic inequalities in colorectal cancer survival? PhD Thesis. <https://researchonline.lshtm.ac.uk>: London School of Hygiene and Tropical Medicine; 2009.
  26. Jones AP, Haynes R, Sauerzapf V, Crawford SM, Zhao H, Forman D. Travel time to hospital and treatment for breast, colon, rectum, lung, ovary and prostate cancer. *European Journal of Cancer*. 2008;44(7):992-9.
  27. National Cancer Registration and Analysis Service. Chemotherapy, Radiotherapy and Surgical Tumour Resections in England. Workbook 1: "Chemotherapy, Radiotherapy and Tumour Resection by Tumour and Patient Characteristics in England, 2013-2015". National Cancer Registration and Analysis Service Website. 2018 [Accessed October 2022]. Available from: [http://www.ncin.org.uk/cancer\\_type\\_and\\_topic\\_specific\\_work/topic\\_specific\\_work/main\\_cancer\\_treatments](http://www.ncin.org.uk/cancer_type_and_topic_specific_work/topic_specific_work/main_cancer_treatments).
  28. National Cancer Intelligence Network. Major surgical resections England, 2004-2006. National Cancer Registration and Analysis Service Website. 2011 [Accessed October 2022]. Available from: [http://www.ncin.org.uk/publications/reports/reports\\_archive](http://www.ncin.org.uk/publications/reports/reports_archive).
  29. Pollock AM, Vickers N. Deprivation and emergency admissions for cancers of colorectum, lung, and breast in south east England: ecological study. *BMJ*. 1998;317(7153):245.
  30. Bharathan B, Welfare M, Borowski DW, Mills SJ, Steen IN, Kelly SB, et al. Impact of deprivation on short- and long-term outcomes after colorectal cancer surgery. *British Journal of Surgery*. 2011;98(6):854-65.

- 1  
2  
3  
4  
5  
6  
7  
8  
9  
10  
11  
12  
13  
14  
15  
16  
17  
18  
19  
20  
21  
22  
23  
24  
25  
26  
27  
28  
29  
30  
31  
32  
33  
34  
35  
36  
37  
38  
39  
40  
41  
42  
43  
44  
45  
46  
47  
48  
49  
50  
51  
52  
53  
54  
55  
56  
57  
58  
59  
60
31. Harris AR, Bowley Dm Fau - Stannard A, Stannard A Fau - Kurrimboccus S, Kurrimboccus S Fau - Geh JI, Geh Ji Fau - Karandikar S, Karandikar S. Socioeconomic deprivation adversely affects survival of patients with rectal cancer. 2009(1365-2168 (Electronic)).
  32. Vallance AE, van der Meulen J, Kuryba A, Braun M, Jayne DG, Hill J, et al. Socioeconomic differences in selection for liver resection in metastatic colorectal cancer and the impact on survival. *European Journal of Surgical Oncology*. 2018;44(10):1588-94.
  33. Fenton HM, Taylor JC, Lodge JPA, Toogood GJ, Finan PJ, Young AL, et al. Variation in the Use of Resection for Colorectal Cancer Liver Metastases. *Ann Surg*. 2019;270(5):892-8.
  34. Morris EJ, Forman D Fau - Thomas JD, Thomas Jd Fau - Quirke P, Quirke P Fau - Taylor EF, Taylor Ef Fau - Fairley L, Fairley L Fau - Cottier B, et al. Surgical management and outcomes of colorectal cancer liver metastases. *British Journal of Surgery*. 2010;97(7):1110-8.
  35. Fenton HM, Finan PJ, Milton R, Shackcloth M, Taylor JC, Treasure T, et al. National variation in pulmonary metastasectomy for colorectal cancer. *Colorectal Disease*. 2021;23(6):1306-16.
  36. Saito MK. Socioeconomic inequalities in colorectal cancer survival in England and Japan [PhD]: London School of Hygiene & Tropical Medicine; 2019.
  37. Morris E, Quirke P, Thomas JD, Fairley L, Cottier B, Forman D. Unacceptable variation in abdominoperineal excision rates for rectal cancer: time to intervene? *Gut*. 2008;57(12):1690.
  38. Nicholson GA, Morrison DS, Finlay IG, Diamant RH, Horgan PG, Molloy RG. Quality of care in rectal cancer surgery. Exploring influencing factors in the West of Scotland. *Colorectal Disease*. 2012;14(6):731-9.
  39. Tilney HS, Heriot AG, Purkayastha S, Antoniou A, Aylin P, Darzi AW, et al. A National Perspective on the Decline of Abdominoperineal Resection for Rectal Cancer. *Annals of Surgery*. 2008;247(1).
  40. Raine R, Wong W, Scholes S, Ashton C, Obichere A, Ambler G. Social variations in access to hospital care for patients with colorectal, breast, and lung cancer between 1999 and 2006: retrospective analysis of hospital episode statistics. *BMJ*. 2010;340:b5479.
  41. Tilney H, Lovegrove RE, Smith JJ, Thompson MR, Tekkis PP, on behalf of the Association of Coloproctology of Great Britain and I. The National Bowel Cancer Project: Social Deprivation Is an Independent Predictor of Nonrestorative Rectal Cancer Surgery. *Diseases of the Colon & Rectum*. 2009;52(6).
  42. Smith JJ, Tilney HS, Heriot AG, Darzi AW, Forbes H, Thompson MR, et al. Social deprivation and outcomes in colorectal cancer. *British Journal of Surgery*. 2006;93(9):1123-31.
  43. Radwan R, Coyne P, Jones HA-O, Evans M, Davies M, Harris D, et al. Social deprivation in patients requiring pelvic exenterative surgery. *Colorectal Disease*. 2016;18:684-7.
  44. Taylor JC, Swinson D, Seligmann JF, Birch RJ, Dewdney A, Brown V, et al. Addressing the variation in adjuvant chemotherapy treatment for colorectal cancer: Can a regional intervention promote national change? *International Journal of Cancer*. 2021;148(4):845-56.
  45. Boyle JM, Kuryba A, Cowling TE, Aggarwal A, Hill J, van der Meulen J, et al. Determinants of Variation in the Use of Adjuvant Chemotherapy for Stage III Colon Cancer in England. *Clinical Oncology*. 2020;32(5):e135-e44.

- 1
  - 2
  - 3
  - 4
  - 5
  - 6
  - 7
  - 8
  - 9
  - 10
  - 11
  - 12
  - 13
  - 14
  - 15
  - 16
  - 17
  - 18
  - 19
  - 20
  - 21
  - 22
  - 23
  - 24
  - 25
  - 26
  - 27
  - 28
  - 29
  - 30
  - 31
  - 32
  - 33
  - 34
  - 35
  - 36
  - 37
  - 38
  - 39
  - 40
  - 41
  - 42
  - 43
  - 44
  - 45
  - 46
  - 47
  - 48
  - 49
  - 50
  - 51
  - 52
  - 53
  - 54
  - 55
  - 56
  - 57
  - 58
  - 59
  - 60
46. Crawford SM, Sauerzapf V, Haynes R, Forman D, Jones AP. Social and geographical factors affecting access to treatment of colorectal cancer: a cancer registry study. *BMJ Open*. 2012;2(2):e000410.
47. Pitchforth E, Russell E, Van der Pol M. Access to specialist cancer care: is it equitable? *British Journal of Cancer*. 2002;87(11):1221-6.
48. McLeod A. Variation in the provision of chemotherapy for colorectal cancer. *Journal of Epidemiology and Community Health*. 1999;53(12):775.
49. Bailey C, Corner J, Addington-Hall J, Kumar D, Nelson M, Haviland J. Treatment decisions in older patients with colorectal cancer: the role of age and multidimensional function. *European Journal of Cancer Care*. 2003;12(3):257-62.
50. Hole D, McArdle C. Impact of socioeconomic deprivation on outcome after surgery for colorectal cancer. *Br J Surgery*. 2002;89:586-90.
51. Hassan S, Miles A, Rachet B, Morris M. Variations in the Type of Adjuvant Chemotherapy Among Stage III Colon Cancer Patients in England. *Journal of Gastrointestinal Cancer*. 2023.
52. Morris EJA, Finan PJ, Spencer K, Geh I, Crellin A, Quirke P, et al. Wide Variation in the Use of Radiotherapy in the Management of Surgically Treated Rectal Cancer Across the English National Health Service. *Clinical Oncology*. 2016;28(8):522-31.
53. Laura J, Karl A, Rebecca S, Steven O, Una M, Geoff H, et al. Non-attendance at urgent referral appointments for suspected cancer: a qualitative study to gain understanding from patients and GPs. *British Journal of General Practice*. 2019;69(689):e850.
54. Wilson R, Winnard Y. Causes, impacts and possible mitigation of non-attendance of appointments within the National Health Service: a literature review. *Journal of Health Organization and Management*. 2022;36(7):892-911.
55. Azzani M, Roslani AC, Su TT. The perceived cancer-related financial hardship among patients and their families: a systematic review. *Supportive Care in Cancer*. 2015;23(3):889-98.
56. Ngan TT, Tien TH, Donnelly M, O'Neill C. Financial toxicity among cancer patients, survivors and their families in the United Kingdom: a scoping review. *Journal of Public Health*. 2023:fdad143.
57. Holden CE, Wheelwright S, Harle A, Wagland R. The role of health literacy in cancer care: A mixed studies systematic review. *PLOS ONE*. 2021;16(11):e0259815.
58. Andrews C, Childers TC, Wiseman KD, Lawhon V, Ingram S, Smith ML, et al. Facilitators and barriers to reducing chemotherapy for early-stage breast cancer: a qualitative analysis of interviews with patients and patient advocates. *BMC Cancer*. 2022;22(1):141.
59. Cavalli-Björkman N, Glimelius B, Strang P. Equal cancer treatment regardless of education level and family support? A qualitative study of oncologists' decision-making. *BMJ Open*. 2012;2(4):e001248.
60. Amalraj S, Starkweather C, Nguyen C, Naeim A. Health literacy, communication, and treatment decision-making in older cancer patients. *Oncology (Williston Park, NY)*. 2009;23(4):369-75.
61. Busch EL, Martin C, Dewalt DA, Sandler RS. Functional Health Literacy, Chemotherapy Decisions, and Outcomes among a Colorectal Cancer Cohort. *Cancer Control*. 2015;22(1):95-101.
62. Tataru D, Spencer K, Bates A, Wiczorek A, Jack RH, Peake MD, et al. Variation in geographical treatment intensity affects survival of non-small cell lung cancer patients in England. *Cancer Epidemiology*. 2018;57:13-23.
63. Tennant PWG, Murray EJ, Arnold KF, Berrie L, Fox MP, Gadd SC, et al. Use of directed acyclic graphs (DAGs) to identify confounders in applied health research:

- 1  
2 review and recommendations. *International Journal of Epidemiology*. 2021;50(2):620-  
3 32.
- 4 64. Mark P, Margaret W, Sally JM, Hilary G, Matt E. Evidence for public health  
5 policy on inequalities: 1: The reality according to policymakers. *Journal of*  
6 *Epidemiology and Community Health*. 2004;58(10):811.
- 7 65. National Institute for Health and Care Excellence (NICE). Colorectal cancer.  
8 NICE guideline [NG151]. 2020.
- 9 66. Fitch MI, Sharp L, Hanly P, Longo CJ. Experiencing financial toxicity  
10 associated with cancer in publicly funded healthcare systems: a systematic review of  
11 qualitative studies. *Journal of Cancer Survivorship*. 2022;16(2):314-28.
- 12 67. Aggarwal A, Han L, Tree A, Lewis D, Roques T, Sangar V, et al. Impact of  
13 centralization of prostate cancer services on the choice of radical treatment. *BJU*  
14 *International*. 2023;131(1):53-62.
- 15 68. te Marvelde L, McNair P, Whitfield K, Autier P, Boyle P, Sullivan R, et al.  
16 Alignment with Indices of A Care Pathway Is Associated with Improved Survival: An  
17 Observational Population-based Study in Colon Cancer Patients. *EClinicalMedicine*.  
18 2019;15:42-50.
- 19  
20  
21  
22  
23  
24  
25  
26  
27  
28  
29  
30  
31  
32  
33  
34  
35  
36  
37  
38  
39  
40  
41  
42  
43  
44  
45  
46  
47  
48  
49  
50  
51  
52  
53  
54  
55  
56  
57  
58  
59  
60

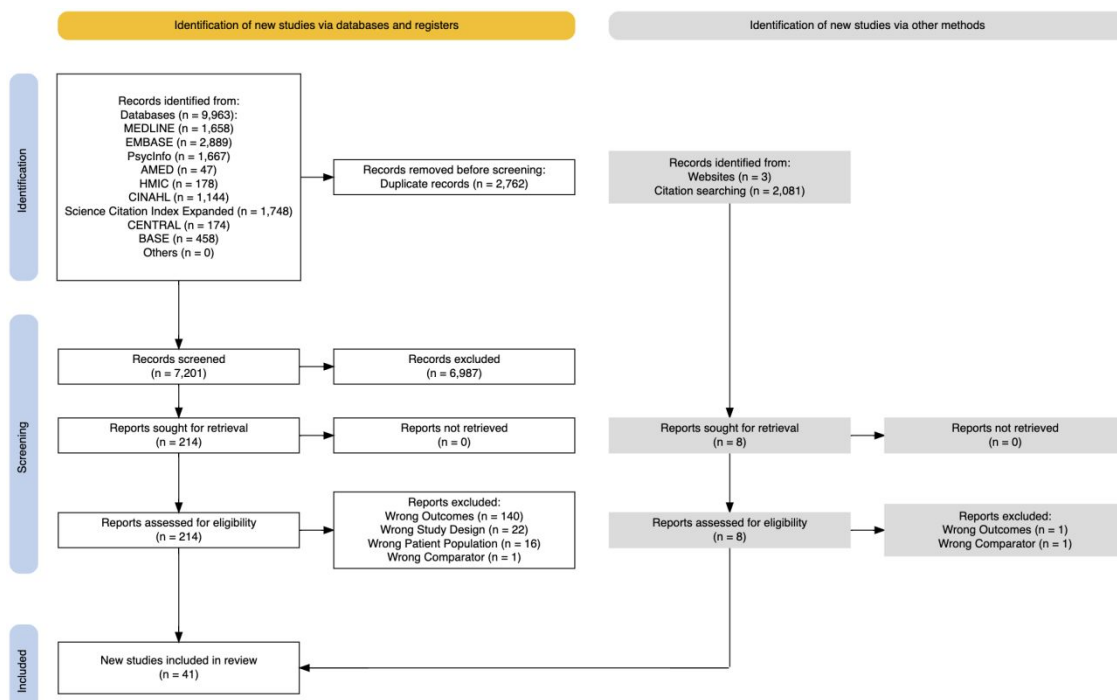

Figure 1: PRISMA flow diagram of included studies.



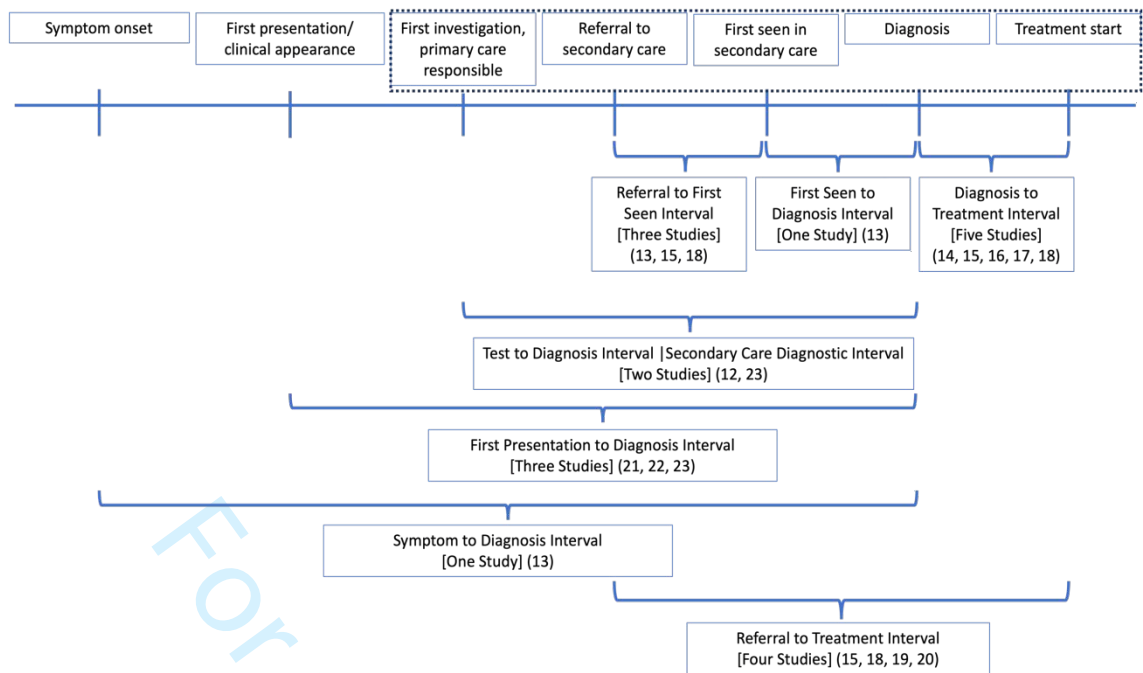

Figure 2: Time intervals evaluated in the included studies.

The blue dotted line indicates the system interval defined by the Aarhus statement.<sup>(4)</sup> Studies that included any aspect of this system interval were included, even if the interval commenced before the system interval defined here.

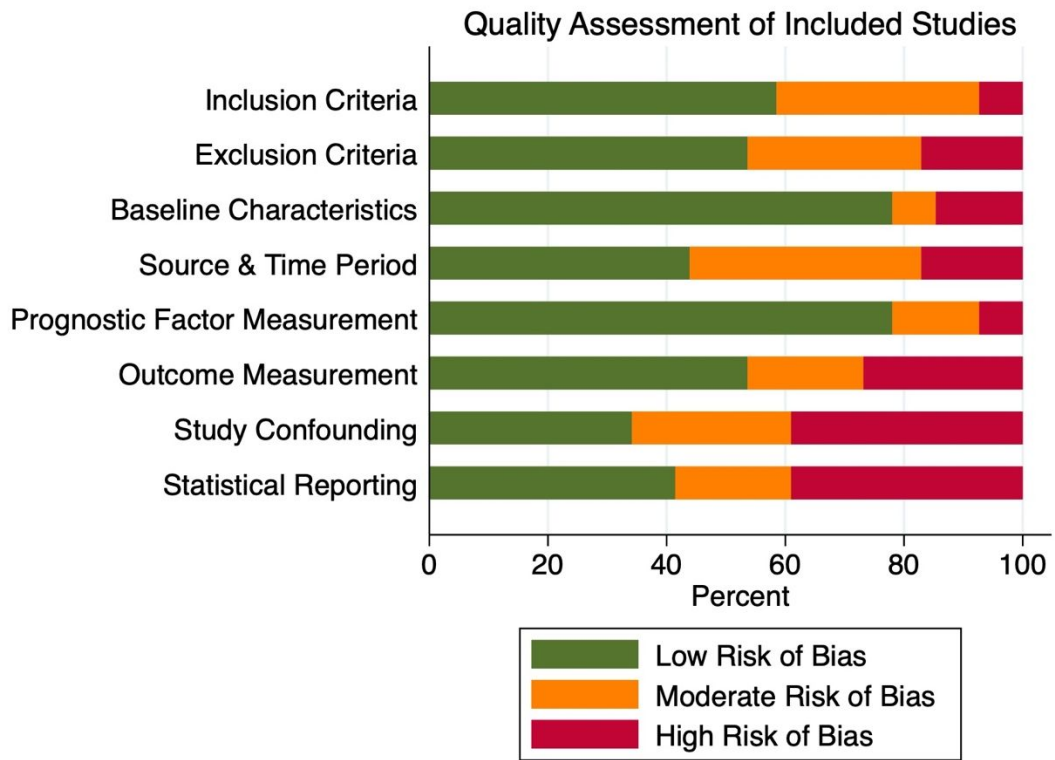

Figure 3: Risk of bias in the included studies. For each element the proportion of studies with high, moderate and low risk of bias is illustrated.

# Where are the inequalities in colorectal cancer care in a country with universal healthcare? A systematic review and narrative synthesis

## Appendix

Benjamin Pickwell-Smith, Katie Spencer, Mahboobeh Haji Sadeghi, Sarah Greenley, Mike Lind, Una Macleod

### *Contents*

Appendix S1: PRISMA Statement Checklist – Page 2-4

Appendix S2: List of Hand-Searched Sources and Details of Citation Searches – Page 5

Appendix S3: Search Strategies – Page 6-31

- Appendix S3.1 – MEDLINE – Page 6-8
- Appendix S3.2 – EMBASE – Page 9-11
- Appendix S3.3 – PsycINFO – Page 12-14
- Appendix S3.4 – AMED – Page 15-16
- Appendix S3.5 – HMIC- Page 17-18
- Appendix S3.6 – CENTRAL – Page 19-21
- Appendix S3.7 – Science Citation Index Expanded – Page 22-25
- Appendix S3.8 – CINAHL – Page 26-30
- Appendix S3.9 – Others – Page 31

Appendix S4: Development and Validation of the Search and Record Management – Page 32

Appendix S5: Data Items and Effect Measures – Page 33

Appendix S6: Study Risk of Bias Assessment – Page 34-36

Appendix S7: Characteristics of Included Studies – Page 37-42

Appendix S8: Results – Association between Socioeconomic Status and the System Interval – Page 43-46

Appendix S9: Results – Likelihood of Receipt of Surgery – Page 47-49

Appendix S10: Results – Likelihood of Surgical Variation – Page 50

Appendix S11: Results – Likelihood of Receipt of Chemotherapy – Page 51-53

Appendix S12: Results – Likelihood of Receipt of Radiotherapy – Page 54-55

Appendix S13: Results – Likelihood of Receipt of Any Treatment – Page 56

References – Page 57-60

Appendix S1: PRISMA Statement Checklist<sup>1</sup>

| Section/topic           | Item # | Checklist item                                                                                                                                                                                                                                                                                       | Reported on page # |
|-------------------------|--------|------------------------------------------------------------------------------------------------------------------------------------------------------------------------------------------------------------------------------------------------------------------------------------------------------|--------------------|
| <b>TITLE</b>            |        |                                                                                                                                                                                                                                                                                                      |                    |
| Title                   | 1      | Identify the report as a systematic review.                                                                                                                                                                                                                                                          | 1                  |
| <b>ABSTRACT</b>         |        |                                                                                                                                                                                                                                                                                                      |                    |
| Abstract                | 2      | As per PRISMA 2020 for Abstracts checklist                                                                                                                                                                                                                                                           | 2-3                |
| <b>INTRODUCTION</b>     |        |                                                                                                                                                                                                                                                                                                      |                    |
| Rationale               | 3      | Describe the rationale for the review in the context of what is already known.                                                                                                                                                                                                                       | 4-5                |
| Objectives              | 4      | Provide an explicit statement of the objective(s) or question(s) the review addresses.                                                                                                                                                                                                               | 5                  |
| <b>METHODS</b>          |        |                                                                                                                                                                                                                                                                                                      |                    |
| Eligibility criteria    | 5      | Specify the inclusion and exclusion criteria for the review and how studies were grouped for the syntheses.                                                                                                                                                                                          | 5-6                |
| Information sources     | 6      | Specify all databases, registers, websites, organisations, reference lists and other sources searched or consulted to identify studies. Specify the date when each source was last searched or consulted.                                                                                            | 6, Appendix S2     |
| Search strategy         | 7      | Present the full search strategies for all databases, registers, and websites, including any filters and limits used.                                                                                                                                                                                | Appendix S3        |
| Study selection         | 8      | Specify the methods used to decide whether a study met the inclusion criteria of the review, including how many reviewers screened each record and each report retrieved, whether they worked independently, and if applicable, details of automation tools used in the process.                     | 6                  |
| Data collection process | 9      | Specify the methods used to collect data from reports, including how many reviewers collected data from each report, whether they worked independently, any processes for obtaining or confirming data from study investigators, and if applicable, details of automation tools used in the process. | 6                  |
| Data items              | 10a    | List and define all outcomes for which data were sought. Specify whether all results that were compatible with each outcome domain in each study were sought (e.g. for all measures, time points, analyses), and if not, the methods used to decide which results to collect.                        | Appendix S5        |
|                         | 10b    | List and define all other variables for which data were sought (e.g. participant and intervention characteristics, funding sources). Describe any assumptions made about any missing or unclear information.                                                                                         | Appendix S5        |

|                               |     |                                                                                                                                                                                                                                                                   |                          |
|-------------------------------|-----|-------------------------------------------------------------------------------------------------------------------------------------------------------------------------------------------------------------------------------------------------------------------|--------------------------|
| Study risk of bias assessment | 11  | Specify the methods used to assess risk of bias in the included studies, including details of the tool(s) used, how many reviewers assessed each study and whether they worked independently, and if applicable, details of automation tools used in the process. | 7                        |
| Effect measures               | 12  | Specify for each outcome the effect measure(s) (e.g. risk ratio, mean difference) used in the synthesis or presentation of results.                                                                                                                               | Appendix S5              |
| Synthesis methods             | 13a | Describe the processes used to decide which studies were eligible for each synthesis (e.g. tabulating the study intervention characteristics and comparing against the planned groups for each synthesis (item #5)).                                              | 7                        |
|                               | 13b | Describe any methods required to prepare the data for presentation or synthesis, such as handling of missing summary statistics, or data conversions.                                                                                                             | Appendix S5              |
|                               | 13c | Describe any methods used to tabulate or visually display results of individual studies and syntheses.                                                                                                                                                            | Appendix S5              |
|                               | 13d | Describe any methods used to synthesize results and provide a rationale for the choice(s). If meta-analysis was performed, describe the model(s), method(s) to identify the presence and extent of statistical heterogeneity, and software package(s) used.       | 7                        |
|                               | 13e | Describe any methods used to explore possible causes of heterogeneity among study results (e.g. subgroup analysis, meta-regression).                                                                                                                              | N/A                      |
|                               | 13f | Describe any sensitivity analyses conducted to assess robustness of the synthesized results.                                                                                                                                                                      | N/A                      |
| Reporting bias assessment     | 14  | Describe any methods used to assess risk of bias due to missing results in a synthesis (arising from reporting biases).                                                                                                                                           | N/A                      |
| Certainty assessment          | 15  | Describe any methods used to assess certainty (or confidence) in the body of evidence for an outcome.                                                                                                                                                             | 7                        |
| <b>RESULTS</b>                |     |                                                                                                                                                                                                                                                                   |                          |
| Study selection               | 16a | Describe the results of the search and selection process, from the number of records identified in the search to the number of studies included in the review, ideally using a flow diagram.                                                                      | 8, Figure 1              |
|                               | 16b | Cite studies that might appear to meet the inclusion criteria, but which were excluded, and explain why they were excluded.                                                                                                                                       | N/A                      |
| Study characteristics         | 17  | Cite each included study and present its characteristics.                                                                                                                                                                                                         | 8, Figure 2, Appendix S7 |
| Risk of bias within studies   | 18  | Present assessments of risk of bias for each included study.                                                                                                                                                                                                      | 8, Figure 3, Appendix S6 |
| Results of individual         | 19  | For all outcomes, present, for each study: (a) summary statistics for each group (where appropriate) and                                                                                                                                                          | 8-15, Appendix S8-       |

|                                                |     |                                                                                                                                                                                                                                                                                      |                          |
|------------------------------------------------|-----|--------------------------------------------------------------------------------------------------------------------------------------------------------------------------------------------------------------------------------------------------------------------------------------|--------------------------|
| studies                                        |     | (b) an effect estimate and its precision (e.g. confidence/credible interval), ideally using structured tables or plots.                                                                                                                                                              | S13                      |
| Results of syntheses                           | 20a | For each synthesis, briefly summarise the characteristics and risk of bias among contributing studies.                                                                                                                                                                               | 8, Figure 3, Appendix S6 |
|                                                | 20b | Present results of all statistical syntheses conducted. If meta-analysis was done, present for each the summary estimate and its precision (e.g. confidence/credible interval) and measures of statistical heterogeneity. If comparing groups, describe the direction of the effect. | 8-15, Appendix S8-S13    |
|                                                | 20c | Present results of all investigations of possible causes of heterogeneity among study results.                                                                                                                                                                                       | N/A                      |
|                                                | 20d | Present results of all sensitivity analyses conducted to assess the robustness of the synthesized results.                                                                                                                                                                           | N/A                      |
| Reporting biases                               | 21  | Present assessments of risk of bias due to missing results (arising from reporting biases) for each synthesis assessed.                                                                                                                                                              | N/A                      |
| Certainty of evidence                          | 22  | Present assessments of certainty (or confidence) in the body of evidence for each outcome assessed.                                                                                                                                                                                  | 8-15, Table 1            |
| <b>DISCUSSION</b>                              |     |                                                                                                                                                                                                                                                                                      |                          |
| Discussion                                     | 23a | Provide a general interpretation of the results in the context of other evidence.                                                                                                                                                                                                    | 18-22                    |
|                                                | 23b | Discuss any limitations of the evidence included in the review.                                                                                                                                                                                                                      | 18-22                    |
|                                                | 23c | Discuss any limitations of the review processes used.                                                                                                                                                                                                                                | 18-22                    |
|                                                | 23d | Discuss implications of the results for practice, policy, and future research.                                                                                                                                                                                                       | 18-22                    |
| <b>Other Information</b>                       |     |                                                                                                                                                                                                                                                                                      |                          |
| Registration and protocol                      | 24a | Provide registration information for the review, including register name and registration number, or state that the review was not registered.                                                                                                                                       | 2, 5                     |
|                                                | 24b | Indicate where the review protocol can be accessed, or state that a protocol was not prepared.                                                                                                                                                                                       | 5                        |
|                                                | 24c | Describe and explain any amendments to information provided at registration or in the protocol.                                                                                                                                                                                      | N/A                      |
| Support                                        | 25  | Describe sources of financial or non-financial support for the review, and the role of the funders or sponsors in the review.                                                                                                                                                        | 3,4                      |
| Competing interests                            | 26  | Declare any competing interests of review authors.                                                                                                                                                                                                                                   | 23                       |
| Availability of data, code and other materials | 27  | Report which of the following are publicly available and where they can be found: template data collection forms; data extracted from included studies; data used for all analyses; analytic code; any other materials used in the review.                                           | 23                       |

## Appendix S2: List of Hand-Searched Online Sources and Details of Citation Searches

The following websites were hand-searched on 30/03/2023:

- The National Cancer Registration and Analysis Service (<http://www.ncin.org.uk/home>)
- Cancer Research UK (<https://www.cancerresearchuk.org/>)
- Macmillan Cancer Support (<https://www.macmillan.org.uk>)
- The King's Fund (<https://www.kingsfund.org.uk/>)
- Office for Health Improvement and Disparities (<https://www.gov.uk/government/organisations/office-for-health-improvement-and-disparities>)
- National Bowel Cancer Audit (<https://www.nboca.org.uk>)
- Bowel Cancer UK (<https://www.bowelcanceruk.org.uk>)
- National Health Service England (<https://www.england.nhs.uk/about/equality/equality-hub/>)
- The Association of Coloproctology of Great Britain & Ireland (<https://www.acpgbi.org.uk>)
- NHS Digital (<https://digital.nhs.uk>)
- Health Data Insight CIC (<https://healthdatainsight.org.uk>)
- National Disease Registration Service (<https://www.ndrs.nhs.uk>)

The automated tool 'citationchaser' conducted forward and backward citation searches on thirty-nine included studies where a digital object identifier was available.<sup>2-40</sup>

These searches identified 838 unique records using backwards searching and 1,628 unique records using forwards searching.<sup>41</sup> These records were then screened by BPS in EndNote X9.<sup>42</sup>

The bibliographies of two systematic reviews were also examined for relevant articles.<sup>43,44</sup>

### Appendix S3.1: Search Strategies – MEDLINE (OVID)

Initial searches were conducted on 31<sup>st</sup> August 2021. Repeat searches were conducted across all databases on 26/01/2023, limited to date of database entry between 20/08/2021 to 26/01/2023.

#### Ovid MEDLINE(R) ALL <1946 to August 31, 2021>

1 exp Colorectal Neoplasms/  
 2 ((colon\* or colorectal or rectal) adj3 (cancer\* or neoplas\* or tumor\* or tumour\* or  
 3 malignan\* or carcinoma\* or metasta\* or oncolog\*)).mp  
 4 or/1-2 [cancer population of interest]  
 5 exp Socioeconomic Factors/  
 6 (socio-economic or socioeconomic or socio-demographic or sociodemographic).mp  
 7 exp Education, Continuing/ or Education/  
 8 exp Income/  
 9 exp Health Status/  
 10 exp Poverty/  
 11 (socio-economic position or socioeconomic position).mp.  
 12 inequalities.mp.  
 13 exp Social Environment/  
 14 social factors.mp.  
 15 income.mp.  
 16 exp Residence Characteristics/  
 17 Social class.mp.  
 18 Education.mp.  
 19 exp Health Status Disparities/  
 20 depriv\*.mp.  
 21 (equity or equitable).mp.  
 22 (inequity or inequitable).mp.  
 23 inequities.mp.  
 24 disparit\*.mp.  
 25 or/4-23 [inequality concept]  
 26 surgery.mp.  
 27 Treatment.mp.  
 28 exp Health Services Accessibility/  
 29 exp Healthcare Disparities/  
 30 treatment disparities.mp.  
 31 exp "Delivery of Health Care"/  
 32 exp Primary Health Care/  
 33 exp Drug Therapy/  
 34 chemotherapy.mp.  
 35 Radiotherapy/ or Radiotherapy, Adjuvant/  
 36 radiotherapy.mp.  
 37 accessibility.mp.



1  
 2  
 3 37 access.mp.  
 4 38 pattern\$.mp.  
 5 39 palliative care/ or Patient care/ or Primary Health care/  
 6 40 care.mp.  
 7 41 investigation.mp.  
 8 42 exp "Quality of Health Care"/  
 9 43 exp Patient Selection/ or exp Eligibility Determination/  
 10 44 exp "Referral and Consultation"/  
 11 45 Receipt.mp. or exp "Patient Acceptance of Health Care"/  
 12 46 Provision.mp.  
 13 47 Attendance.mp.  
 14 48 25 or 26 or 27 or 28 or 29 or 30 or 31 or 32 or 33 or 34 or 35 or 36 or 37 or 38 or 39  
 15 or 40 or 41 or 42 or 43 or 44 or 45 or 46 or 47 [treatment concept]  
 16 49 exp "Early Detection of Cancer"/  
 17 50 exp Delayed Diagnosis/  
 18 51 ((patient\* or present\* or doctor\* or physician\* or practitioner\* or hospital\* or  
 19 system\* or (primary adj care) or (secondary adj care) or total or (help adj3 seek) or pre-  
 20 treatment\* or referr\* or specialist\* or consultant\* or surg\* or chemothera\* or radiothera\*  
 21 or treatment\* or diagnos\*) adj5 (delay\* or interval\* or time\* or pathway\* or route\*)).ti,ab.  
 22 52 (stage\* adj5 (diagnosis or diagnostic)).ti,ab.  
 23 53 49 or 50 or 51 or 52 [interval filter]  
 24 54 exp United Kingdom/  
 25 55 (national health service\* or NHS\*).ti,ab,in.  
 26 56 (english not ((published or publication\* or translat\* or written or language\* or  
 27 speak\* or literature or citation\*) adj5 english)).ti,ab.  
 28 57 (gb or "g.b." or britain\* or (british\* not "british columbia") or uk or "u.k." or united  
 29 kingdom\* or (england\* not "new england") or northern ireland\* or northern irish\* or  
 30 scotland\* or scottish\* or ((wales or "south wales") not "new south wales") or  
 31 welsh\*).ti,ab,jw,in.  
 32 58 (bath or "bath's" or ((birmingham not alabama\*) or ("birmingham's" not alabama\*)  
 33 or bradford or "bradford's" or brighton or "brighton's" or bristol or "bristol's" or carlisle\* or  
 34 "carlisle's" or (cambridge not (massachusetts\* or boston\* or harvard\*)) or ("cambridge's"  
 35 not (massachusetts\* or boston\* or harvard\*)) or (canterbury not zealand\*) or  
 36 ("canterbury's" not zealand\*) or chelmsford or "chelmsford's" or chester or "chester's" or  
 37 chichester or "chichester's" or coventry or "coventry's" or derby or "derby's" or (durham not  
 38 (carolina\* or nc)) or ("durham's" not (carolina\* or nc)) or ely or "ely's" or exeter or  
 39 "exeter's" or gloucester or "gloucester's" or hereford or "hereford's" or hull or "hull's" or  
 40 lancaster or "lancaster's" or leeds\* or leicester or "leicester's" or (lincoln not nebraska\*) or  
 41 ("lincoln's" not nebraska\*) or (liverpool not (new south wales\* or nsw)) or ("liverpool's" not  
 42 (new south wales\* or nsw)) or ((london not (ontario\* or ont or toronto\*)) or ("london's" not  
 43 (ontario\* or ont or toronto\*)) or manchester or "manchester's" or (newcastle not (new  
 44 south wales\* or nsw)) or ("newcastle's" not (new south wales\* or nsw)) or norwich or  
 45 "norwich's" or nottingham or "nottingham's" or oxford or "oxford's" or peterborough or  
 46 "peterborough's" or plymouth or "plymouth's" or portsmouth or "portsmouth's" or preston  
 47 or "preston's" or ripon or "ripon's" or salford or "salford's" or salisbury or "salisbury's" or  
 48 sheffield or "sheffield's" or southampton or "southampton's" or st albans or stoke or  
 49 "stoke's" or sunderland or "sunderland's" or truro or "truro's" or wakefield or "wakefield's"  
 50  
 51  
 52  
 53  
 54  
 55  
 56  
 57  
 58  
 59  
 60

1  
2  
3 or wells or westminster or "westminster's" or winchester or "winchester's" or  
4 wolverhampton or "wolverhampton's" or (worcester not (massachusetts\* or boston\* or  
5 harvard\*)) or ("worcester's" not (massachusetts\* or boston\* or harvard\*)) or (york not  
6 ("new york\*" or ny or ontario\* or ont or toronto\*)) or ("york's" not ("new york\*" or ny or  
7 ontario\* or ont or toronto\*))))).ti,ab,in.

8  
9 59 (bangor or "bangor's" or cardiff or "cardiff's" or newport or "newport's" or st asaph  
10 or "st asaph's" or st davids or swansea or "swansea's").ti,ab,in.

11  
12 60 (aberdeen or "aberdeen's" or dundee or "dundee's" or edinburgh or "edinburgh's"  
13 or glasgow or "glasgow's" or inverness or (perth not australia\*) or ("perth's" not australia\*)  
14 or stirling or "stirling's").ti,ab,in.

15  
16 61 (armagh or "armagh's" or belfast or "belfast's" or lisburn or "lisburn's" or  
17 londonderry or "londonderry's" or derry or "derry's" or newry or "newry's").ti,ab,in.

18  
19 62 54 or 55 or 56 or 57 or 58 or 59 or 60 or 61

20  
21 63 (exp africa/ or exp americas/ or exp Antarctic regions/ or exp arctic regions/ or exp  
22 asia/ or exp oceania/) not (exp great britain/ or europe/)

23  
24 64 62 not 63 [NICE UK filter]

25  
26 65 case reports.pt.

27  
28 66 news.pt.

29  
30 67 letter.pt.

31  
32 68 comment.pt.

33  
34 69 exp animals/ not humans.sh.

35  
36 70 65 or 66 or 67 or 68 or 69 [excluding animals and unwanted publication types]

37  
38 71 3 and 24 and 48

39  
40 72 3 and 24 and 53

41  
42 73 71 or 72

43  
44 74 64 and 73

45  
46 75 74 not 70

## Appendix S3.2: Search Strategies – EMBASE (OVID)

### OVID Embase <1974 to 2021 August 31>

1 exp colorectal tumor/  
 2 ((colon\* or colorectal or rectal) adj3 (cancer\* or neoplas\* or tumor\* or tumour\* or  
 3 malignan\* or carcinoma\* or metasta\* or oncolog\*)).mp.  
 4 1 or 2 [cancer population of interest]  
 5 exp socioeconomics/  
 6 (socio-economic or socioeconomic or socio-demographic or sociodemographic).mp.  
 7 exp education/  
 8 exp income/  
 9 exp health status/  
 10 exp poverty/  
 11 (socioeconomic position or socio-economic position).mp.  
 12 inequalities.mp.  
 13 exp social environment/  
 14 social factors.mp.  
 15 income.mp.  
 16 exp demography/  
 17 social class.mp.  
 18 education.mp.  
 19 exp health disparity/  
 20 depriv\*.mp.  
 21 (equity or equitable).mp.  
 22 (inequity or inequitable).mp.  
 23 inequities.mp.  
 24 disparit\*.mp.  
 25 4 or 5 or 6 or 7 or 8 or 9 or 10 or 11 or 12 or 13 or 14 or 15 or 16 or 17 or 18 or 19 or  
 26 20 or 21 or 22 or 23 or 23 [inequality concept]  
 27 surgery.mp.  
 28 treatment.mp.  
 29 exp health care access/  
 30 exp health care disparity/  
 31 treatment disparities.mp.  
 32 exp health care delivery/  
 33 exp primary health care/  
 34 exp drug therapy/  
 35 chemotherapy.mp.  
 36 adjuvant radiotherapy/ or radiotherapy/  
 37 radiotherapy.mp.  
 38 accessibility.mp.  
 39 access.mp.  
 40 pattern\*.mp.  
 41 palliative therapy/ or patient care/ or primary health care/  
 42 care.mp.  
 43 investigation.mp.

1  
 2  
 3 42 exp health care quality/  
 4 43 exp patient selection/99092  
 5 44 exp patient referral/ or exp consultation/  
 6 45 receipt.mp. or exp "Patient attitude"/  
 7 46 provision.mp.  
 8 47 attendance.mp.  
 9  
 10 48 25 or 26 or 27 or 28 or 29 or 30 or 31 or 32 or 33 or 34 or 35 or 36 or 37 or 38 or 39  
 11 or 40 or 41 or 42 or 43 or 44 or 45 or 46 or 47 [treatment concept]  
 12  
 13 49 exp early cancer diagnosis/  
 14 50 exp delayed diagnosis/  
 15 51 ((patient\* or present\* or doctor\* or physician\* or practitioner\* or hospital\* or  
 16 system\* or (primary adj care) or (secondary adj care) or total or (help adj3 seek) or pre-  
 17 treatment\* or referr\* or specialist\* or consultant\* or surg\* or chemothera\* or radiothera\*  
 18 or treatment\* or diagnos\*) adj5 (delay\* or interval\* or time\* or pathway\* or route\*)).ti,ab.  
 19 52 (stage\* adj5 (diagnosis or diagnostic)).ti,ab.  
 20 53 49 or 50 or 51 or 52 [interval filter]  
 21  
 22 54 exp United Kingdom/  
 23 55 (national health service\* or nhs\*).ti,ab,in,ad.  
 24 56 (english not ((published or publication\* or translat\* or written or language\* or  
 25 speak\* or literature or citation\*) adj5 english)).ti,ab.  
 26 57 (gb or "g.b." or britain\* or (british\* not "british columbia") or uk or "u.k." or united  
 27 kingdom\* or (england\* not "new england") or northern ireland\* or northern irish\* or  
 28 scotland\* or scottish\* or ((wales or "south wales") not "new south wales") or  
 29 welsh\*).ti,ab,jx,in,ad.  
 30 58 (bath or "bath's" or ((birmingham not alabama\*) or ("birmingham's" not alabama\*)  
 31 or bradford or "bradford's" or brighton or "brighton's" or bristol or "bristol's" or carlisle\* or  
 32 "carlisle's" or (cambridge not (massachusetts\* or boston\* or harvard\*)) or ("cambridge's"  
 33 not (massachusetts\* or boston\* or harvard\*)) or (canterbury not zealand\*) or  
 34 ("canterbury's" not zealand\*) or chelmsford or "chelmsford's" or chester or "chester's" or  
 35 chichester or "chichester's" or coventry or "coventry's" or derby or "derby's" or (durham not  
 36 (carolina\* or nc)) or ("durham's" not (carolina\* or nc)) or ely or "ely's" or exeter or  
 37 "exeter's" or gloucester or "gloucester's" or hereford or "hereford's" or hull or "hull's" or  
 38 lancaster or "lancaster's" or leeds\* or leicester or "leicester's" or (lincoln not nebraska\*) or  
 39 ("lincoln's" not nebraska\*) or (liverpool not (new south wales\* or nsw)) or ("liverpool's" not  
 40 (new south wales\* or nsw)) or ((london not (ontario\* or ont or toronto\*)) or ("london's" not  
 41 (ontario\* or ont or toronto\*)) or manchester or "manchester's" or (newcastle not (new  
 42 south wales\* or nsw)) or ("newcastle's" not (new south wales\* or nsw)) or norwich or  
 43 "norwich's" or nottingham or "nottingham's" or oxford or "oxford's" or peterborough or  
 44 "peterborough's" or plymouth or "plymouth's" or portsmouth or "portsmouth's" or preston  
 45 or "preston's" or ripon or "ripon's" or salford or "salford's" or salisbury or "salisbury's" or  
 46 sheffield or "sheffield's" or southampton or "southampton's" or st albans or stoke or  
 47 "stoke's" or sunderland or "sunderland's" or truro or "truro's" or wakefield or "wakefield's"  
 48 or wells or westminster or "westminster's" or winchester or "winchester's" or  
 49 wolverhampton or "wolverhampton's" or (worcester not (massachusetts\* or boston\* or  
 50 harvard\*)) or ("worcester's" not (massachusetts\* or boston\* or harvard\*)) or (york not  
 51 ("new york\*" or ny or ontario\* or ont or toronto\*)) or ("york's" not ("new york\*" or ny or  
 52 ontario\* or ont or toronto\*))))).ti,ab,in,ad.  
 53  
 54  
 55  
 56  
 57  
 58  
 59  
 60

1  
2  
3  
4 59 (bangor or "bangor's" or cardiff or "cardiff's" or newport or "newport's" or st asaph  
5 or "st asaph's" or st davids or swansea or "swansea's").ti,ab,in,ad.  
6 60 (aberdeen or "aberdeen's" or dundee or "dundee's" or edinburgh or "edinburgh's"  
7 or glasgow or "glasgow's" or inverness or (perth not australia\*) or ("perth's" not australia\*)  
8 or stirling or "stirling's").ti,ab,in,ad.  
9 61 (armagh or "armagh's" or belfast or "belfast's" or lisburn or "lisburn's" or  
10 londonderry or "londonderry's" or derry or "derry's" or newry or "newry's").ti,ab,in,ad.  
11 62 54 or 55 or 56 or 57 or 58 or 59 or 60 or 61  
12 63 (exp "arctic and antarctic"/ or exp oceanic regions/ or exp western hemisphere/ or  
13 exp africa/ or exp asia/ or exp "australia and new zealand"/) not (exp united kingdom/ or  
14 europe/)  
15 64 62 not 63 [NICE UK Filter]  
16 65 letter.pt.  
17 66 (animal\* not human\*).sh,hw.  
18 67 65 or 66 [excluding animals and unwanted publication types]  
19 68 3 and 24 and 48  
20 69 3 and 24 and 53  
21 70 68 or 69  
22 71 64 and 70  
23 72 71 not 67  
24 73 limit 72 to conference abstract status  
25 74 limit 73 to dd=20200831-20210831  
26 75 72 not 73  
27 76 74 or 75  
28  
29  
30  
31  
32  
33  
34  
35  
36  
37  
38  
39  
40  
41  
42  
43  
44  
45  
46  
47  
48  
49  
50  
51  
52  
53  
54  
55  
56  
57  
58  
59  
60

### Appendix S3.3: Search Strategies – PsycINFO (OVID)

#### OVID APA PsycInfo <1806 to August Week 4 2021>

1 ((colon\* or colorectal or rectal) adj3 (cancer\* or neoplas\* or tumor\* or tumour\* or  
 2 malignan\* or carcinoma\* or metasta\* or oncolog\*)).af. [cancer population of interest]  
 3 exp Socioeconomic Factors/  
 4 (socio-economic or socioeconomic or socio-demographic or sociodemographic).af.  
 5 exp Education/  
 6 exp Income Level/ or exp "Income (Economic)"/  
 7 exp Health Status/  
 8 exp Poverty/  
 9 (socio-economic position or socioeconomic position).af.  
 10 inequalities.af.  
 11 exp Social Environments/  
 12 social factors.af.  
 13 income.af.  
 14 exp Neighborhoods/ or exp Urban Environments/ or exp Housing/  
 15 social class.af.  
 16 education.af.  
 17 exp Health Disparities/  
 18 depriv\*.af.  
 19 (equity or equitable).af.  
 20 (inequity or inequitable).af.  
 21 inequities.af.  
 22 disparit\*.af.  
 23 2 or 3 or 4 or 5 or 6 or 7 or 8 or 9 or 10 or 11 or 12 or 13 or 14 or 15 or 16 or 17 or 18  
 24 or 19 or 20 or 21 [inequality concept]  
 25 surgery.af.  
 26 Treatment.af.  
 27 exp Health Care Utilization/ or exp Health Care Delivery/ or exp Health Care Access/  
 28 or exp Treatment Barriers/  
 29 treatment disparities.af.  
 30 exp Health Care Services/  
 31 exp Primary Health Care/  
 32 exp Drug Therapy/  
 33 chemotherapy.af.  
 34 exp Radiation Therapy/  
 35 exp Chemotherapy/  
 36 radiotherapy.af.  
 37 accessibility.af.  
 38 access.af.  
 39 pattern\$.af.  
 40 exp Palliative Care/  
 care.af.  
 investigation.af.  
 exp "Quality of Care"/ or exp "Quality of Services"/

1  
 2  
 3 41 exp Patient Selection/  
 4 42 exp Decision Making/  
 5 43 receipt.af.  
 6 44 provision.af.  
 7 45 attendance.af.  
 8  
 9 46 23 or 24 or 25 or 26 or 27 or 28 or 29 or 30 or 31 or 32 or 33 or 34 or 35 or 36 or 37  
 10 or 38 or 39 or 40 or 41 or 42 or 43 or 44 or 45 [treatment concept]  
 11 47 ((patient\* or present\* or doctor\* or physician\* or practitioner\* or hospital\* or  
 12 system\* or (primary adj care) or (secondary adj care) or total or (help adj3 seek) or pre-  
 13 treatment\* or referr\* or specialist\* or consultant\* or surg\* or chemothera\* or radiothera\*  
 14 or treatment\* or diagnos\*) adj5 (delay\* or interval\* or time\* or pathway\* or route\*)).ti,ab.  
 15 48 (stage\* adj5 (diagnosis or diagnostic)).ti,ab.  
 16 49 47 or 48 [interval concept]  
 17 50 (national health service\* or NHS\*).ti,ab,in.  
 18 51 (english not ((published or publication\* or translat\* or written or language\* or  
 19 speak\* or literature or citation\*) adj5 english)).ti,ab.  
 20 52 (gb or "g.b." or britain\* or (british\* not "british columbia") or uk or "u.k." or united  
 21 kingdom\* or (england\* not "new england") or northern ireland\* or northern irish\* or  
 22 scotland\* or scottish\* or ((wales or "south wales") not "new south wales") or  
 23 welsh\*).ti,ab,jx,in.  
 24 53 (bath or "bath's" or ((birmingham not alabama\*) or ("birmingham's" not alabama\*)  
 25 or bradford or "bradford's" or brighton or "brighton's" or bristol or "bristol's" or carlisle\* or  
 26 "carlisle's" or (cambridge not (massachusetts\* or boston\* or harvard\*)) or ("cambridge's"  
 27 not (massachusetts\* or boston\* or harvard\*)) or (canterbury not zealand\*) or  
 28 ("canterbury's" not zealand\*) or chelmsford or "chelmsford's" or chester or "chester's" or  
 29 chichester or "chichester's" or coventry or "coventry's" or derby or "derby's" or (durham not  
 30 (carolina\* or nc)) or ("durham's" not (carolina\* or nc)) or ely or "ely's" or exeter or  
 31 "exeter's" or gloucester or "gloucester's" or hereford or "hereford's" or hull or "hull's" or  
 32 lancaster or "lancaster's" or leeds\* or leicester or "leicester's" or (lincoln not nebraska\*) or  
 33 ("lincoln's" not nebraska\*) or (liverpool not (new south wales\* or nsw)) or ("liverpool's" not  
 34 (new south wales\* or nsw)) or ((london not (ontario\* or ont or toronto\*)) or ("london's" not  
 35 (ontario\* or ont or toronto\*)) or manchester or "manchester's" or (newcastle not (new  
 36 south wales\* or nsw)) or ("newcastle's" not (new south wales\* or nsw)) or norwich or  
 37 "norwich's" or nottingham or "nottingham's" or oxford or "oxford's" or peterborough or  
 38 "peterborough's" or plymouth or "plymouth's" or portsmouth or "portsmouth's" or preston  
 39 or "preston's" or ripon or "ripon's" or salford or "salford's" or salisbury or "salisbury's" or  
 40 sheffield or "sheffield's" or southampton or "southampton's" or st albans or stoke or  
 41 "stoke's" or sunderland or "sunderland's" or truro or "truro's" or wakefield or "wakefield's"  
 42 or wells or westminster or "westminster's" or winchester or "winchester's" or  
 43 wolverhampton or "wolverhampton's" or (worcester not (massachusetts\* or boston\* or  
 44 harvard\*)) or ("worcester's" not (massachusetts\* or boston\* or harvard\*)) or (york not  
 45 ("new york\*" or ny or ontario\* or ont or toronto\*)) or ("york's" not ("new york\*" or ny or  
 46 ontario\* or ont or toronto\*))))).ti,ab,in.  
 47 54 (bangor or "bangor's" or cardiff or "cardiff's" or newport or "newport's" or st asaph  
 48 or "st asaph's" or st davids or swansea or "swansea's").ti,ab,in.  
 49  
 50  
 51  
 52  
 53  
 54  
 55  
 56  
 57  
 58  
 59  
 60

1  
2  
3 55 (aberdeen or "aberdeen's" or dundee or "dundee's" or edinburgh or "edinburgh's"  
4 or glasgow or "glasgow's" or inverness or (perth not australia\*) or ("perth's" not australia\*)  
5 or stirling or "stirling's").ti,ab,in.

6  
7 56 (armagh or "armagh's" or belfast or "belfast's" or lisburn or "lisburn's" or  
8 londonderry or "londonderry's" or derry or "derry's" or newry or "newry's").ti,ab,in.

9 57 50 or 51 or 52 or 53 or 54 or 55 or 56 [UK filter]

10 58 exp animals/ not humans.sh. [excluding animals]

11 59 1 and 22 and 46

12 60 1 and 22 and 49

13 61 59 or 60

14 62 57 and 61

15 63 62 not 58

16  
17  
18  
19  
20  
21  
22  
23  
24  
25  
26  
27  
28  
29  
30  
31  
32  
33  
34  
35  
36  
37  
38  
39  
40  
41  
42  
43  
44  
45  
46  
47  
48  
49  
50  
51  
52  
53  
54  
55  
56  
57  
58  
59  
60

For peer review only



## Appendix S3.4: Search Strategies – AMED (OVID)

### AMED (Allied and Complementary Medicine) <1985 to August 2021>

1 exp Colorectal neoplasms/  
 2 ((colon\* or colorectal or rectal) adj3 (cancer\* or neoplas\* or tumor\* or tumour\* or  
 3 malignan\* or carcinoma\* or metasta\* or oncolog\*)).mp.  
 4 1 or 2  
 5 exp Socioeconomic factors/  
 6 (socio-economic or socioeconomic or socio-demographic or sociodemographic).mp.  
 7 exp education/  
 8 exp Income/  
 9 exp Health status/  
 10 exp Poverty/  
 11 (socio-economic position or socioeconomic position).mp.  
 12 inequalities.mp.  
 13 exp Social environment/  
 14 social factors.mp.  
 15 income.mp.  
 16 exp Residence characteristics/  
 17 Social class.mp.  
 18 Education.mp.  
 19 depriv\*.mp.  
 20 (equity or equitable).mp.  
 21 (inequity or inequitable).mp.  
 22 inequities.mp.  
 23 disparit\*.mp.  
 24 4 or 5 or 6 or 7 or 8 or 9 or 10 or 11 or 12 or 13 or 14 or 15 or 16 or 17 or 18 or 19 or  
 25 20 or 21 or 22  
 26 surgery.mp.  
 27 Treatment.mp.  
 28 exp Health services accessibility/  
 29 treatment disparities.mp.  
 30 exp "Delivery of health care"/  
 31 exp Primary health care/  
 32 exp Drug therapy/  
 33 chemotherapy.mp.  
 34 exp Radiotherapy/  
 35 radiotherapy.mp.  
 36 accessibility.mp.  
 37 access.mp.  
 38 pattern\$.mp.  
 39 exp palliative care/  
 40 exp Patient care/  
 41 care.mp.  
 42 investigation.mp.  
 43 exp "Quality of health care"/

1  
2  
3 42 exp Patient assessment/  
4 43 exp "Referral and consultation"/  
5 44 exp "Patient acceptance of health care"/  
6 45 receipt.mp.  
7 46 Provision.mp.  
8 47 Attendance.mp.  
9  
10 48 24 or 25 or 26 or 27 or 28 or 29 or 30 or 31 or 32 or 33 or 34 or 35 or 36 or 37 or 38  
11 or 39 or 40 or 41 or 42 or 43 or 44 or 45 or 46 or 47  
12  
13 49 ((patient\* or present\* or doctor\* or physician\* or practitioner\* or hospital\* or  
14 system\* or (primary adj care) or (secondary adj care) or total or (help adj3 seek) or pre-  
15 treatment\* or referr\* or specialist\* or consultant\* or surg\* or chemothera\* or radiothera\*  
16 or treatment\* or diagnos\*) adj5 (delay\* or interval\* or time\* or pathway\* or route\*).ti,ab.  
17  
18 50 (stage\* adj5 (diagnosis or diagnostic)).ti,ab.  
19 51 49 or 50  
20 52 3 and 23 and 48  
21 53 3 and 23 and 51  
22 54 52 or 53  
23  
24  
25  
26  
27  
28  
29  
30  
31  
32  
33  
34  
35  
36  
37  
38  
39  
40  
41  
42  
43  
44  
45  
46  
47  
48  
49  
50  
51  
52  
53  
54  
55  
56  
57  
58  
59  
60

## Appendix S3.5: Search Strategies – HMIC (OVID)

### HMIC Health Management Information Consortium <1979 to August 2021>

1 exp Colorectal cancer/  
 2 ((colon\* or colorectal or rectal) adj3 (cancer\* or neoplas\* or tumor\* or tumour\* or  
 3 malignan\* or carcinoma\* or metasta\* or oncolog\*)).af..  
 4 1 or 2  
 5 exp Socioeconomic factors/  
 6 (socio-economic or socioeconomic or socio-demographic or sociodemographic).af.  
 7 exp education/  
 8 exp Income/  
 9 exp health status/  
 10 exp Poverty/  
 11 (socio-economic position or socioeconomic position).af.  
 12 inequalities.af.  
 13 exp Social conditions/  
 14 social factors.af.  
 15 income.af.  
 16 social class.af.  
 17 education.af.  
 18 exp Health inequalities/  
 19 depriv\*.af.  
 20 (equity or equitable).af.  
 21 (inequity or inequitable).af.  
 22 inequities.af.  
 23 disparit\*.af.  
 24 4 or 5 or 6 or 7 or 8 or 9 or 10 or 11 or 12 or 13 or 14 or 15 or 16 or 17 or 18 or 19 or  
 25 20 or 21 or 22  
 26 surgery.af.  
 27 treatment.af.  
 28 exp Access to health services/  
 29 treatment disparities.af.  
 30 exp Service delivery/  
 31 exp primary care/  
 32 exp Drug therapy/  
 33 chemotherapy.af.  
 34 exp Radiotherapy/  
 35 radiotherapy.af.  
 36 accessibility.af.  
 37 access.af.  
 38 pattern\*.af.  
 39 exp Palliative care/  
 40 exp patient care/  
 41 care.af.  
 42 investigation.af.  
 43 exp "Quality of patient care"/

1  
2  
3 42 exp Patient selection/  
4 43 exp Patient eligibility/  
5 44 exp Patient referral/  
6 45 receipt.af.  
7 46 provision.af.  
8 47 attendance.af.  
9  
10 48 24 or 25 or 26 or 27 or 28 or 29 or 30 or 31 or 32 or 33 or 34 or 35 or 36 or 37 or 38  
11 or 39 or 40 or 41 or 42 or 43 or 44 or 45 or 46 or 47  
12  
13 49 exp Early diagnosis/  
14 50 exp Patient waiting time/  
15 51 ((patient\* or present\* or doctor\* or physician\* or practitioner\* or hospital\* or  
16 system\* or (primary adj care) or (secondary adj care) or total or (help adj3 seek) or pre-  
17 treatment\* or referr\* or specialist\* or consultant\* or surg\* or chemothera\* or radiothera\*  
18 or treatment\* or diagnos\*) adj5 (delay\* or interval\* or time\* or pathway\* or route\*)).mp.  
19  
20 52 (stage\* adj5 (diagnosis or diagnostic)).ti,ab.  
21  
22 53 49 or 50 or 51 or 52  
23 54 3 and 23 and 48  
24 55 3 and 23 and 53  
25 56 54 or 55  
26  
27  
28  
29  
30  
31  
32  
33  
34  
35  
36  
37  
38  
39  
40  
41  
42  
43  
44  
45  
46  
47  
48  
49  
50  
51  
52  
53  
54  
55  
56  
57  
58  
59  
60

## Appendix S3.6: Search Strategies – CENTRAL (The Cochrane Library)

**Search Name: CENTRAL Search**

**Last Saved: 01/09/2021 17:45:46**

| ID  | Search                                                                                                                                           |
|-----|--------------------------------------------------------------------------------------------------------------------------------------------------|
| #1  | MeSH descriptor: [Colorectal Neoplasms] explode all trees                                                                                        |
| #2  | ((colon* or colorectal or rectal) NEAR/3 (cancer* or neoplas* or tumor* or tumour* or malignan* or carcinoma* or metasta* or oncolog*)):ti,ab,kw |
| #3  | #1 or #2                                                                                                                                         |
| #4  | MeSH descriptor: [Socioeconomic Factors] explode all trees                                                                                       |
| #5  | ((socio-economic or socioeconomic or socio-demographic or sociodemographic)):ti,ab,kw                                                            |
| #6  | MeSH descriptor: [Education] explode all trees                                                                                                   |
| #7  | MeSH descriptor: [Income] explode all trees                                                                                                      |
| #8  | MeSH descriptor: [Health Status] explode all trees                                                                                               |
| #9  | MeSH descriptor: [Poverty] explode all trees                                                                                                     |
| #10 | ((socio-economic position or socioeconomic position)):ti,ab,kw                                                                                   |
| #11 | (inequalities):ti,ab,kw                                                                                                                          |
| #12 | MeSH descriptor: [Social Environment] explode all trees                                                                                          |
| #13 | (social factors):ti,ab,kw                                                                                                                        |
| #14 | (income):ti,ab,kw                                                                                                                                |
| #15 | MeSH descriptor: [Residence Characteristics] explode all trees                                                                                   |
| #16 | (Social class):ti,ab,kw                                                                                                                          |
| #17 | (education):ti,ab,kw                                                                                                                             |
| #18 | MeSH descriptor: [Health Status Disparities] explode all trees                                                                                   |
| #19 | (Depriv*):ti,ab,kw                                                                                                                               |
| #20 | ((equity or equitable)):ti,ab,kw                                                                                                                 |
| #21 | ((inequity or inequitable)):ti,ab,kw                                                                                                             |
| #22 | (inequities):ti,ab,kw                                                                                                                            |
| #23 | (disparit*):ti,ab,kw                                                                                                                             |
| #24 | #4 or #5 or #6 or #7 or #8 or #9 or #10 or #11 or #12 or #13 or #14 or #15 or #16 or #17 or #18 or #19 or #20 or #21 or #22 or #23               |
| #25 | (surgery):ti,ab,kw                                                                                                                               |
| #26 | (treatment):ti,ab,kw                                                                                                                             |
| #27 | MeSH descriptor: [Health Services Accessibility] explode all trees                                                                               |
| #28 | MeSH descriptor: [Healthcare Disparities] explode all trees                                                                                      |
| #29 | (treatment disparities):ti,ab,kw                                                                                                                 |
| #30 | MeSH descriptor: [Delivery of Health Care] explode all trees                                                                                     |
| #31 | MeSH descriptor: [Primary Health Care] explode all trees                                                                                         |
| #32 | MeSH descriptor: [Drug Therapy] explode all trees                                                                                                |
| #33 | (chemotherapy):ti,ab,kw                                                                                                                          |
| #34 | MeSH descriptor: [Radiotherapy] explode all trees                                                                                                |
| #35 | (radiotherapy):ti,ab,kw                                                                                                                          |
| #36 | (accessibility):ti,ab,kw                                                                                                                         |
| #37 | (access):ti,ab,kw                                                                                                                                |
| #38 | (pattern*):ti,ab,kw                                                                                                                              |

- 1  
2  
3 #49 MeSH descriptor: [Patient Care] explode all trees  
4 #40 MeSH descriptor: [Palliative Care] explode all trees  
5 #41 MeSH descriptor: [Primary Health Care] explode all trees  
6 #42 (care or investigation):ti,ab,kw  
7 #43 MeSH descriptor: [Quality of Health Care] explode all trees  
8 #44 MeSH descriptor: [Patient Selection] explode all trees  
9 #45 MeSH descriptor: [Eligibility Determination] explode all trees  
10 #46 MeSH descriptor: [Referral and Consultation] explode all trees  
11 #47 MeSH descriptor: [Patient Acceptance of Health Care] explode all trees  
12 #48 (receipt or provision or attendance):ti,ab,kw  
13 #49 #25 or #26 or #27 or #28 or #29 or #30 or #31 or #32 or #33 or #34 or #35 or #36 or  
14 #37 or #38 or #39 or #40 or #41 or #42 or #43 or #44 or #45 or #46 or #47 or #48  
15 #50 MeSH descriptor: [Early Detection of Cancer] explode all trees  
16 #51 MeSH descriptor: [Delayed Diagnosis] explode all trees  
17 #52 (((patient\* or present\* or doctor\* or physician\* or practitioner\* or hospital\* or  
18 system\* or (primary NEAR/1 care) or (secondary NEAR/1 care) or total or (help NEAR/3  
19 seek) or pre-treatment\* or referr\* or specialist\* or consultant\* or surg\* or chemothera\* or  
20 radiothera\* or treatment\* or diagnos\*) NEAR/5 (delay\* or interval\* or time\* or pathway\*  
21 or route\*)))):ti,ab,kw  
22 #53 ((stage\* NEAR/5 (diagnosis or diagnostic))):ti,ab,kw  
23 #54 #50 or #51 or #52 or #53  
24 #55 MeSH descriptor: [United Kingdom] explode all trees  
25 #56 ((national health service\* or NHS\*)):ti,ab,kw  
26 #57 ((english not ((published or publication\* or translat\* or written or language\* or  
27 speak\* or literature or citation\*) NEAR/5 english))):ti,ab,kw  
28 #58 ((gb or "g.b." or britain\* or (british\* not "british columbia") or uk or "u.k." or united  
29 kingdom\* or (england\* not "new england") or northern ireland\* or northern irish\* or  
30 scotland\* or scottish\* or ((wales or "south wales") not "new south wales") or  
31 welsh\*)):ti,ab,kw  
32 #59 ((bath or "bath's" or ((birmingham not alabama\*) or ("birmingham's" not alabama\*)  
33 or bradford or "bradford's" or brighton or "brighton's" or bristol or "bristol's" or carlisle\* or  
34 "carlisle's" or (cambridge not (massachusetts\* or boston\* or harvard\*)) or ("cambridge's"  
35 not (massachusetts\* or boston\* or harvard\*)) or (canterbury not zealand\*) or  
36 ("canterbury's" not zealand\*) or chelmsford or "chelmsford's" or chester or "chester's" or  
37 chichester or "chichester's" or coventry or "coventry's" or derby or "derby's" or (durham not  
38 (carolina\* or nc)) or ("durham's" not (carolina\* or nc)) or ely or "ely's" or exeter or  
39 "exeter's" or gloucester or "gloucester's" or hereford or "hereford's" or hull or "hull's" or  
40 lancaster or "lancaster's" or leeds\* or leicester or "leicester's" or (lincoln not nebraska\*) or  
41 ("lincoln's" not nebraska\*) or (liverpool not (new south wales\* or nsw)) or ("liverpool's" not  
42 (new south wales\* or nsw)) or ((london not (ontario\* or ont or toronto\*)) or ("london's" not  
43 (ontario\* or ont or toronto\*)) or manchester or "manchester's" or (newcastle not (new  
44 south wales\* or nsw)) or ("newcastle's" not (new south wales\* or nsw)) or norwich or  
45 "norwich's" or nottingham or "nottingham's" or oxford or "oxford's" or peterborough or  
46 "peterborough's" or plymouth or "plymouth's" or portsmouth or "portsmouth's" or preston  
47 or "preston's" or ripon or "ripon's" or salford or "salford's" or salisbury or "salisbury's" or  
48 sheffield or "sheffield's" or southampton or "southampton's" or st albans or stoke or  
49 "stoke's" or sunderland or "sunderland's" or truro or "truro's" or wakefield or "wakefield's"

1  
2  
3 or wells or westminster or "westminster's" or winchester or "winchester's" or  
4 wolverhampton or "wolverhampton's" or (worcester not (massachusetts\* or boston\* or  
5 harvard\*)) or ("worcester's" not (massachusetts\* or boston\* or harvard\*)) or (york not  
6 ("new york\*" or ny or ontario\* or ont or toronto\*)) or ("york's" not ("new york\*" or ny or  
7 ontario\* or ont or toronto\*))))):ti,ab,kw  
8  
9 #60 ((bangor or "bangor's" or cardiff or "cardiff's" or newport or "newport's" or st asaph  
10 or "st asaph's" or st davids or swansea or "swansea's")):ti,ab,kw  
11  
12 #61 ((aberdeen or "aberdeen's" or dundee or "dundee's" or edinburgh or "edinburgh's"  
13 or glasgow or "glasgow's" or inverness or (perth not australia\*) or ("perth's" not australia\*)  
14 or stirling or "stirling's")):ti,ab,kw  
15  
16 #62 ((armagh or "armagh's" or belfast or "belfast's" or lisburn or "lisburn's" or  
17 londonderry or "londonderry's" or derry or "derry's" or newry or "newry's")):ti,ab,kw  
18  
19 #63 #55 or #56 or #57 or #58 or #59 or #60 or #61 or #62  
20  
21 #64 MeSH descriptor: [Africa] explode all trees  
22  
23 #65 MeSH descriptor: [Americas] explode all trees  
24  
25 #66 MeSH descriptor: [Antarctic Regions] explode all trees  
26  
27 #67 MeSH descriptor: [Arctic Regions] explode all trees  
28  
29 #68 MeSH descriptor: [Asia] explode all trees  
30  
31 #69 MeSH descriptor: [Oceania] explode all trees  
32  
33 #70 MeSH descriptor: [United Kingdom] explode all trees  
34  
35 #71 MeSH descriptor: [Europe] explode all trees  
36  
37 #72 #64 or #65 or #66 or #67 or #68 or #69  
38  
39 #73 #70 or #71  
40  
41 #74 #72 NOT #73  
42  
43 #75 #63 NOT #74  
44  
45 #76 #3 and #24 and #49  
46  
47 #77 #3 and #24 and #54  
48  
49 #78 #76 or #77  
50  
51 #79 #78 and #75  
52  
53  
54  
55  
56  
57  
58  
59  
60

## Appendix S3.7: Search Strategies – Science Citation Index Expanded

### Science Citation Index Expanded via Web Of Science Core Collection 01/9/21.

18

#9 AND #17

17

#10 OR #11 OR #12 OR #13 OR #14 OR #15 OR #16

16

(TI=(armagh or "armagh's" or belfast or "belfast's" or lisburn or "lisburn's" or londonderry or "londonderry's" or derry or "derry's" or newry or "newry's")) OR (AB=(armagh or "armagh's" or belfast or "belfast's" or lisburn or "lisburn's" or londonderry or "londonderry's" or derry or "derry's" or newry or "newry's")) OR (AD=(armagh or "armagh's" or belfast or "belfast's" or lisburn or "lisburn's" or londonderry or "londonderry's" or derry or "derry's" or newry or "newry's"))

15

(TI=(aberdeen or "aberdeen's" or dundee or "dundee's" or edinburgh or "edinburgh's" or glasgow or "glasgow's" or inverness or (perth not australia\*) or ("perth's" not australia\*) or stirling or "stirling's")) OR (AB=(aberdeen or "aberdeen's" or dundee or "dundee's" or edinburgh or "edinburgh's" or glasgow or "glasgow's" or inverness or (perth not australia\*) or ("perth's" not australia\*) or stirling or "stirling's")) OR (AD=(aberdeen or "aberdeen's" or dundee or "dundee's" or edinburgh or "edinburgh's" or glasgow or "glasgow's" or inverness or (perth not australia\*) or ("perth's" not australia\*) or stirling or "stirling's"))

14

(TI=(bangor or "bangor's" or cardiff or "cardiff's" or newport or "newport's" or st asaph or "st asaph's" or st davids or swansea or "swansea's")) OR (AB=(bangor or "bangor's" or cardiff or "cardiff's" or newport or "newport's" or st asaph or "st asaph's" or st davids or swansea or "swansea's")) OR (AD=(bangor or "bangor's" or cardiff or "cardiff's" or newport or "newport's" or st asaph or "st asaph's" or st davids or swansea or "swansea's"))

13

(TI=(bath or "bath's" or ((birmingham not alabama\*) or ("birmingham's" not alabama\*) or bradford or "bradford's" or brighton or "brighton's" or bristol or "bristol's" or carlisle\* or "carlisle's" or (cambridge not (massachusetts\* or boston\* or harvard\*)) or ("cambridge's" not (massachusetts\* or boston\* or harvard\*)) or (canterbury not zealand\*) or ("canterbury's" not zealand\*) or chelmsford or "chelmsford's" or chester or "chester's" or chichester or "chichester's" or coventry or "coventry's" or derby or "derby's" or (durham not (carolina\* or nc)) or ("durham's" not (carolina\* or nc)) or ely or "ely's" or exeter or "exeter's" or gloucester or "gloucester's" or hereford or "hereford's" or hull or "hull's" or lancaster or "lancaster's" or leeds\* or leicester or "leicester's" or (lincoln not nebraska\*) or ("lincoln's" not nebraska\*) or (liverpool not (new south wales\* or nsw)) or ("liverpool's" not (new south wales\* or nsw)) or ((london not (ontario\* or ont or toronto\*)) or ("london's" not (ontario\* or ont or toronto\*)) or manchester or "manchester's" or (newcastle not (new south wales\* or nsw)) or ("newcastle's" not (new south wales\* or nsw)) or norwich or "norwich's" or nottingham or "nottingham's" or oxford or "oxford's" or peterborough or "peterborough's" or plymouth or "plymouth's" or portsmouth or "portsmouth's" or preston or "preston's" or ripon or "ripon's" or salford or "salford's" or salisbury or



1  
 2  
 3 "salisbury's" or sheffield or "sheffield's" or southampton or "southampton's" or st  
 4 albans or stoke or "stoke's" or sunderland or "sunderland's" or truro or "truro's" or  
 5 wakefield or "wakefield's" or wells or westminster or "westminster's" or winchester or  
 6 "winchester's" or wolverhampton or "wolverhampton's" or (worchester not  
 7 (massachusetts\* or boston\* or harvard\*)) or ("worchester's" not (massachusetts\* or  
 8 boston\* or harvard\*)) or (york not ("new york\*" or ny or ontario\* or ont or toronto\*))  
 9 or ("york's" not ("new york\*" or ny or ontario\* or ont or toronto\*)))))) OR (AB=(bath or  
 10 "bath's" or ((birmingham not alabama\*) or ("birmingham's" not alabama\*) or bradford  
 11 or "bradford's" or brighton or "brighton's" or bristol or "bristol's" or carlisle\* or  
 12 "carlisle's" or (cambridge not (massachusetts\* or boston\* or harvard\*)) or  
 13 ("cambridge's" not (massachusetts\* or boston\* or harvard\*)) or (canterbury not  
 14 zealand\*) or ("canterbury's" not zealand\*) or chelmsford or "chelmsford's" or chester  
 15 or "chester's" or chichester or "chichester's" or coventry or "coventry's" or derby or  
 16 "derby's" or (durham not (carolina\* or nc)) or ("durham's" not (carolina\* or nc)) or ely  
 17 or "ely's" or exeter or "exeter's" or gloucester or "gloucester's" or hereford or  
 18 "hereford's" or hull or "hull's" or lancaster or "lancaster's" or leeds\* or leicester or  
 19 "leicester's" or (lincoln not nebraska\*) or ("lincoln's" not nebraska\*) or (liverpool not  
 20 (new south wales\* or nsw)) or ("liverpool's" not (new south wales\* or nsw)) or  
 21 ((london not (ontario\* or ont or toronto\*)) or ("london's" not (ontario\* or ont or  
 22 toronto\*)) or manchester or "manchester's" or (newcastle not (new south wales\* or  
 23 nsw)) or ("newcastle's" not (new south wales\* or nsw)) or norwich or "norwich's" or  
 24 nottingham or "nottingham's" or oxford or "oxford's" or peterborough or  
 25 "peterborough's" or plymouth or "plymouth's" or portsmouth or "portsmouth's" or  
 26 preston or "preston's" or ripon or "ripon's" or salford or "salford's" or salisbury or  
 27 "salisbury's" or sheffield or "sheffield's" or southampton or "southampton's" or st  
 28 albans or stoke or "stoke's" or sunderland or "sunderland's" or truro or "truro's" or  
 29 wakefield or "wakefield's" or wells or westminster or "westminster's" or winchester or  
 30 "winchester's" or wolverhampton or "wolverhampton's" or (worchester not  
 31 (massachusetts\* or boston\* or harvard\*)) or ("worchester's" not (massachusetts\* or  
 32 boston\* or harvard\*)) or (york not ("new york\*" or ny or ontario\* or ont or toronto\*))  
 33 or ("york's" not ("new york\*" or ny or ontario\* or ont or toronto\*)))))) OR (AD=(bath or  
 34 "bath's" or ((birmingham not alabama\*) or ("birmingham's" not alabama\*) or bradford  
 35 or "bradford's" or brighton or "brighton's" or bristol or "bristol's" or carlisle\* or  
 36 "carlisle's" or (cambridge not (massachusetts\* or boston\* or harvard\*)) or  
 37 ("cambridge's" not (massachusetts\* or boston\* or harvard\*)) or (canterbury not  
 38 zealand\*) or ("canterbury's" not zealand\*) or chelmsford or "chelmsford's" or chester  
 39 or "chester's" or chichester or "chichester's" or coventry or "coventry's" or derby or  
 40 "derby's" or (durham not (carolina\* or nc)) or ("durham's" not (carolina\* or nc)) or ely  
 41 or "ely's" or exeter or "exeter's" or gloucester or "gloucester's" or hereford or  
 42 "hereford's" or hull or "hull's" or lancaster or "lancaster's" or leeds\* or leicester or  
 43 "leicester's" or (lincoln not nebraska\*) or ("lincoln's" not nebraska\*) or (liverpool not  
 44 (new south wales\* or nsw)) or ("liverpool's" not (new south wales\* or nsw)) or  
 45 ((london not (ontario\* or ont or toronto\*)) or ("london's" not (ontario\* or ont or  
 46 toronto\*)) or manchester or "manchester's" or (newcastle not (new south wales\* or  
 47 nsw)) or ("newcastle's" not (new south wales\* or nsw)) or norwich or "norwich's" or  
 48 nottingham or "nottingham's" or oxford or "oxford's" or peterborough or  
 49 "peterborough's" or plymouth or "plymouth's" or portsmouth or "portsmouth's" or  
 50 preston or "preston's" or ripon or "ripon's" or salford or "salford's" or salisbury or  
 51 "salisbury's" or sheffield or "sheffield's" or southampton or "southampton's" or st  
 52  
 53  
 54  
 55  
 56  
 57  
 58  
 59  
 60

1  
2  
3  
4  
5  
6  
7  
8  
9  
10  
11  
12  
13  
14  
15  
16  
17  
18  
19  
20  
21  
22  
23  
24  
25  
26  
27  
28  
29  
30  
31  
32  
33  
34  
35  
36  
37  
38  
39  
40  
41  
42  
43  
44  
45  
46  
47  
48  
49  
50  
51  
52  
53  
54  
55  
56  
57  
58  
59  
60

albans or stoke or "stoke's" or sunderland or "sunderland's" or truro or "truro's" or wakefield or "wakefield's" or wells or westminster or "westminster's" or winchester or "winchester's" or wolverhampton or "wolverhampton's" or (worcester not (massachusetts\* or boston\* or harvard\*)) or ("worcester's" not (massachusetts\* or boston\* or harvard\*)) or (york not ("new york\*" or ny or ontario\* or ont or toronto\*)) or ("york's" not ("new york\*" or ny or ontario\* or ont or toronto\*))))))

12  
11  
12  
13  
14  
15  
16  
17  
18  
19  
20  
21  
22  
23  
24  
25  
26  
27  
28  
29  
30  
31  
32  
33  
34  
35  
36  
37  
38  
39  
40  
41  
42  
43  
44  
45  
46  
47  
48  
49  
50  
51  
52  
53  
54  
55  
56  
57  
58  
59  
60

(TI=(gb or "g.b." or britain\* or (british\* not "british columbia") or uk or "u.k." or united kingdom\* or (england\* not "new england") or northern ireland\* or northern irish\* or scotland\* or scottish\* or ((wales or "south wales") not "new south wales") or welsh\*)) OR (AB=(gb or "g.b." or britain\* or (british\* not "british columbia") or uk or "u.k." or united kingdom\* or (england\* not "new england") or northern ireland\* or northern irish\* or scotland\* or scottish\* or ((wales or "south wales") not "new south wales") or welsh\*)) OR (AD=(gb or "g.b." or britain\* or (british\* not "british columbia") or uk or "u.k." or united kingdom\* or (england\* not "new england") or northern ireland\* or northern irish\* or scotland\* or scottish\* or ((wales or "south wales") not "new south wales") or welsh\*))

11  
12  
13  
14  
15  
16  
17  
18  
19  
20  
21  
22  
23  
24  
25  
26  
27  
28  
29  
30  
31  
32  
33  
34  
35  
36  
37  
38  
39  
40  
41  
42  
43  
44  
45  
46  
47  
48  
49  
50  
51  
52  
53  
54  
55  
56  
57  
58  
59  
60

(TI=(english not ((published or publication\* or translat\* or written or language\* or speak\* or literature or citation\*) near/5 english))) OR (AB=(english not ((published or publication\* or translat\* or written or language\* or speak\* or literature or citation\*) near/5 english)))

10  
11  
12  
13  
14  
15  
16  
17  
18  
19  
20  
21  
22  
23  
24  
25  
26  
27  
28  
29  
30  
31  
32  
33  
34  
35  
36  
37  
38  
39  
40  
41  
42  
43  
44  
45  
46  
47  
48  
49  
50  
51  
52  
53  
54  
55  
56  
57  
58  
59  
60

((TI=((national health service\* or NHS\*))) OR AB=((national health service\* or NHS\*))) OR AD=((national health service\* or NHS\*))

9  
10  
11  
12  
13  
14  
15  
16  
17  
18  
19  
20  
21  
22  
23  
24  
25  
26  
27  
28  
29  
30  
31  
32  
33  
34  
35  
36  
37  
38  
39  
40  
41  
42  
43  
44  
45  
46  
47  
48  
49  
50  
51  
52  
53  
54  
55  
56  
57  
58  
59  
60

#7 OR #8

8  
9  
10  
11  
12  
13  
14  
15  
16  
17  
18  
19  
20  
21  
22  
23  
24  
25  
26  
27  
28  
29  
30  
31  
32  
33  
34  
35  
36  
37  
38  
39  
40  
41  
42  
43  
44  
45  
46  
47  
48  
49  
50  
51  
52  
53  
54  
55  
56  
57  
58  
59  
60

#1 AND #2 AND #6

7  
8  
9  
10  
11  
12  
13  
14  
15  
16  
17  
18  
19  
20  
21  
22  
23  
24  
25  
26  
27  
28  
29  
30  
31  
32  
33  
34  
35  
36  
37  
38  
39  
40  
41  
42  
43  
44  
45  
46  
47  
48  
49  
50  
51  
52  
53  
54  
55  
56  
57  
58  
59  
60

#1 AND #2 AND #3

6  
7  
8  
9  
10  
11  
12  
13  
14  
15  
16  
17  
18  
19  
20  
21  
22  
23  
24  
25  
26  
27  
28  
29  
30  
31  
32  
33  
34  
35  
36  
37  
38  
39  
40  
41  
42  
43  
44  
45  
46  
47  
48  
49  
50  
51  
52  
53  
54  
55  
56  
57  
58  
59  
60

#4 or #5

5  
6  
7  
8  
9  
10  
11  
12  
13  
14  
15  
16  
17  
18  
19  
20  
21  
22  
23  
24  
25  
26  
27  
28  
29  
30  
31  
32  
33  
34  
35  
36  
37  
38  
39  
40  
41  
42  
43  
44  
45  
46  
47  
48  
49  
50  
51  
52  
53  
54  
55  
56  
57  
58  
59  
60

TS=(stage\* near/5 (diagnosis or diagnostic))

4  
5  
6  
7  
8  
9  
10  
11  
12  
13  
14  
15  
16  
17  
18  
19  
20  
21  
22  
23  
24  
25  
26  
27  
28  
29  
30  
31  
32  
33  
34  
35  
36  
37  
38  
39  
40  
41  
42  
43  
44  
45  
46  
47  
48  
49  
50  
51  
52  
53  
54  
55  
56  
57  
58  
59  
60

TS=((patient\* or present\* or doctor\* or physician\* or practitioner\* or hospital\* or system\* or (primary near/1 care) or (secondary near/1 care) or total or (help near/3 seek) or pre-treatment\* or referr\* or specialist\* or consultant\* or surg\* or chemothera\* or radiothera\* or treatment\* or diagnos\*) near/5 (delay\* or interval\* or time\* or pathway\* or route\*))

3  
4  
5  
6  
7  
8  
9  
10  
11  
12  
13  
14  
15  
16  
17  
18  
19  
20  
21  
22  
23  
24  
25  
26  
27  
28  
29  
30  
31  
32  
33  
34  
35  
36  
37  
38  
39  
40  
41  
42  
43  
44  
45  
46  
47  
48  
49  
50  
51  
52  
53  
54  
55  
56  
57  
58  
59  
60

TS=(surgery or treatment or "treatment disparities" or chemotherapy or radiotherapy or accessibility or access or pattern\* or care or investigation or receipt or provision or attendance)

2  
3  
4  
5  
6  
7  
8  
9  
10  
11  
12  
13  
14  
15  
16  
17  
18  
19  
20  
21  
22  
23  
24  
25  
26  
27  
28  
29  
30  
31  
32  
33  
34  
35  
36  
37  
38  
39  
40  
41  
42  
43  
44  
45  
46  
47  
48  
49  
50  
51  
52  
53  
54  
55  
56  
57  
58  
59  
60

TS=(socio-economic or socioeconomic or socio-demographic or sociodemographic or "socio-economic position" or "socioeconomic position" or inequalities or "social factors"

1  
2  
3 or income or "social class" or education or depriv\* or equity or equitable or inequity or  
4 inequitable or inequities or disparit\*)

5  
6 1  
7 (TS=(((colon\* or colorectal or rectal) near/3 (cancer\* or neoplas\* or tumor\* or tumour\*  
8 or malignan\* or carcinoma\* or metasta\* or oncolog\*))))  
9  
10  
11  
12  
13  
14  
15  
16  
17  
18  
19  
20  
21  
22  
23  
24  
25  
26  
27  
28  
29  
30  
31  
32  
33  
34  
35  
36  
37  
38  
39  
40  
41  
42  
43  
44  
45  
46  
47  
48  
49  
50  
51  
52  
53  
54  
55  
56  
57  
58  
59  
60

For peer review only

## Appendix S3.8: Search Strategies – CINAHL

### CINAHL Searched via EBSCO 31/8/21

| #   | Query                                                                                                                                                                                                                                                                            |
|-----|----------------------------------------------------------------------------------------------------------------------------------------------------------------------------------------------------------------------------------------------------------------------------------|
| S1  | (MH "Colorectal Neoplasms+")                                                                                                                                                                                                                                                     |
| S2  | TI ((colon* or colorectal or rectal) n3 (cancer* or neoplas* or tumor* or tumour* or malignan* or carcinoma* or metasta* or oncolog*)) or AB ((colon* or colorectal or rectal) n3 (cancer* or neoplas* or tumor* or tumour* or malignan* or carcinoma* or metasta* or oncolog*)) |
| S3  | S1 OR S2                                                                                                                                                                                                                                                                         |
| S4  | (MH "Socioeconomic Factors+")                                                                                                                                                                                                                                                    |
| S5  | TI (socio-economic or socioeconomic or socio-demographic or sociodemographic) or AB (socio-economic or socioeconomic or socio-demographic or sociodemographic)                                                                                                                   |
| S6  | (MH "Education+")                                                                                                                                                                                                                                                                |
| S7  | (MH "Income+")                                                                                                                                                                                                                                                                   |
| S8  | (MH "Health Status+")                                                                                                                                                                                                                                                            |
| S9  | (MH "Poverty+")                                                                                                                                                                                                                                                                  |
| S10 | TI (socio-economic position or socioeconomic position) or AB (socio-economic position or socioeconomic position)                                                                                                                                                                 |
| S11 | TI inequalities or AB inequalities                                                                                                                                                                                                                                               |
| S12 | (MH "Social Environment+")                                                                                                                                                                                                                                                       |
| S13 | TI (social factors) or AB (social factors)                                                                                                                                                                                                                                       |
| S14 | TI income or AB income                                                                                                                                                                                                                                                           |
| S15 | (MH "Residence Characteristics+")                                                                                                                                                                                                                                                |
| S16 | TI (social class) or AB (social class)                                                                                                                                                                                                                                           |
| S17 | TI education or AB education                                                                                                                                                                                                                                                     |
| S18 | (MH "Health Status Disparities")                                                                                                                                                                                                                                                 |
| S19 | TI (depriv*) or AB (depriv*)                                                                                                                                                                                                                                                     |
| S20 | TI (equity or equitable) or AB (equity or equitable)                                                                                                                                                                                                                             |
| S21 | TI (inequity or inequitable) or AB (inequity or inequitable)                                                                                                                                                                                                                     |
| S22 | TI inequities or AB inequities                                                                                                                                                                                                                                                   |
| S23 | TI disparit* or AB disparit*                                                                                                                                                                                                                                                     |
| S24 | (S4 OR S5 OR S6 OR S7 OR S8 OR S9 OR S10 OR S11 OR S12 OR S13 OR S14 OR S15 OR S16 OR S17 OR S18 OR S19 OR S20 OR S21 OR S22 OR S23)                                                                                                                                             |
| S25 | TI (surgery) or AB (surgery)                                                                                                                                                                                                                                                     |
| S26 | TI (treatment) or AB (treatment)                                                                                                                                                                                                                                                 |
| S27 | (MH "Health Services Accessibility+")                                                                                                                                                                                                                                            |

- 1  
2  
3  
4 S28 (MH "Healthcare Disparities")  
5 S29 TI (treatment disparities) or AB (treatment disparities)  
6  
7 S30 (MH "Health Care Delivery+")  
8  
9 S31 (MH "Primary Health Care")  
10  
11 S32 (MH "Drug Therapy+")  
12  
13 S33 TI (chemotherapy) or AB (chemotherapy)  
14  
15 S34 (MH "Radiotherapy, Adjuvant+") OR (MH "Radiotherapy+")  
16  
17 S35 TI (radiotherapy) or AB (radiotherapy)  
18  
19 S36 TI (accessibility) or AB (accessibility)  
20  
21 S37 TI (access) AB (access)  
22  
23 S38 TI (pattern\*) or AB (pattern\*)  
24  
25 S39 (MH "Patient Care+") or (MH "Palliative Care")  
26  
27 S40 TI (care) or AB (care)  
28  
29 S41 TI (investigation) or AB (investigation)  
30  
31 S42 (MH "Quality of Health Care+")  
32  
33 S43 (MH "Eligibility Determination") or (MH "Patient Selection")  
34  
35 S44 (MH "Referral and Consultation+")  
36  
37 S45 TI (("receipt") or ("patient acceptance of health care")) or AB (("receipt") or ("patient  
38 acceptance of health care"))  
39  
40 S46 TI (provision) or AB (provision)  
41  
42 S47 TI (attendance) or AB (attendance)  
43  
44 S25 OR S26 OR S27 OR S28 OR S29 OR S30 OR S31 OR S32 OR S33 OR S34 OR S35 OR  
45 S36 OR S37 OR S38 OR S39 OR S40 OR S41 OR S42 OR S43 OR S44 OR S45 OR S46 OR  
46 S47  
47  
48 S49 (MH "Early Detection of Cancer")  
49  
50 S50 (MH "Early Diagnosis+")  
51  
52 TI ( ((patient\* or present\* or doctor\* or physician\* or practitioner\* or hospital\* or system\* or  
53 (primary n1 care) or (secondary n1 care) or total or (help n1 seek) or pre-treatment\* or referr\*  
54 or specialist\* or consultant\* or surg\* or chemothera\* or radiothera\* or treatment\* or diagnos\*)  
55 n5 (delay\* or interval\* or time\* or pathway\* or route\*)) ) OR AB ( ((patient\* or present\* or  
56 doctor\* or physician\* or practitioner\* or hospital\* or system\* or (primary n1 care) or  
57 (secondary n1 care) or total or (help n1 seek) or pre-treatment\* or referr\* or specialist\* or  
58 consultant\* or surg\* or chemothera\* or radiothera\* or treatment\* or diagnos\*) n5 (delay\* or  
59 interval\* or time\* or pathway\* or route\*)) )  
60  
S51  
S52 TI ( (stage\* n5 (diagnosis or diagnostic)) ) OR AB ( (stage\* n5 (diagnosis or diagnostic)) )  
S53  
S54 S49 OR S50 OR S51 OR S52  
(MH "Great Britain") OR (MH "United Kingdom+")

1  
2  
3  
4 S55 TI ( (national health service\* or NHS\*) ) OR AB ( (national health service\* or NHS\*) ) OR AF  
5 ( (national health service\* or NHS\*) )

6  
7 S56 TI ( (english not ((published or publication\* or translat\* or written or language\* or speak\* or  
8 literature or citation\*) n5 english)) ) OR AB ( (english not ((published or publication\* or  
9 translat\* or written or language\* or speak\* or literature or citation\*) n5 english)) )

10  
11 TI ( (gb or "g.b." or britain\* or (british\* not "british columbia") or uk or "u.k." or united  
12 kingdom\* or (england\* not "new england") or northern ireland\* or northern irish\* or scotland\*  
13 or scottish\* or ((wales or "south wales") not "new south wales") or welsh\*) ) OR AB ( (gb or  
14 "g.b." or britain\* or (british\* not "british columbia") or uk or "u.k." or united kingdom\* or  
15 (england\* not "new england") or northern ireland\* or northern irish\* or scotland\* or scottish\* or  
16 ((wales or "south wales") not "new south wales") or welsh\*) ) OR AF ( (gb or "g.b." or britain\*  
17 or (british\* not "british columbia") or uk or "u.k." or united kingdom\* or (england\* not "new  
18 england") or northern ireland\* or northern irish\* or scotland\* or scottish\* or ((wales or "south  
19 wales") not "new south wales") or welsh\*) )

20  
21 S57 TI ( (bath or "bath's" or ((birmingham not alabama\*) or ("birmingham's" not alabama\*) or  
22 bradford or "bradford's" or brighton or "brighton's" or bristol or "bristol's" or carlisle\* or  
23 "carlisle's" or (cambridge not (massachusetts\* or boston\* or harvard\*)) or ("cambridge's" not  
24 (massachusetts\* or boston\* or harvard\*)) or (canterbury not zealand\*) or ("canterbury's" not  
25 zealand\*) or chelmsford or "chelmsford's" or chester or "chester's" or chichester or  
26 "chichester's" or coventry or "coventry's" or derby or "derby's" or (durham not (carolina\* or nc))  
27 or ("durham's" not (carolina\* or nc)) or ely or "ely's" or exeter or "exeter's" or gloucester or  
28 "gloucester's" or hereford or "hereford's" or hull or "hull's" or lancaster or "lancaster's" or leeds\*  
29 or leicester or "leicester's" or (lincoln not nebraska\*) or ("lincoln's" not nebraska\*) or (liverpool  
30 not (new south wales\* or nsw)) or ("liverpool's" not (new south wales\* or nsw)) or ((london not  
31 (ontario\* or ont or toronto\*)) or ("london's" not (ontario\* or ont or toronto\*)) or manchester or  
32 "manchester's" or (newcastle not (new south wales\* or nsw)) or ("newcastle's" not (new south  
33 wales\* or nsw)) or norwich or "norwich's" or nottingham or "nottingham's" or oxford or  
34 "oxford's" or peterborough or "peterborough's" or plymouth or "plymouth's" or portsmouth or  
35 "portsmouth's" or preston or "preston's" or ripon or "ripon's" or salford or "salford's" or  
36 salisbury or "salisbury's" or sheffield or "sheffield's" or southampton or "southampton's" or st  
37 albans or stoke or "stoke's" or sunderland or "sunderland's" or truro or "truro's" or wakefield or  
38 "wakefield's" or wells or westminster or "westminster's" or winchester or "winchester's" or  
39 wolverhampton or "wolverhampton's" or (worchester not (massachusetts\* or boston\* or  
40 harvard\*)) or ("worchester's" not (massachusetts\* or boston\* or harvard\*)) or (york not ("new  
41 york\*" or ny or ontario\* or ont or toronto\*)) or ("york's" not ("new york\*" or ny or ontario\* or  
42 ont or toronto\*)))) ) OR AB ( (bath or "bath's" or ((birmingham not alabama\*) or  
43 ("birmingham's" not alabama\*) or bradford or "bradford's" or brighton or "brighton's" or bristol  
44 or "bristol's" or carlisle\* or "carlisle's" or (cambridge not (massachusetts\* or boston\* or  
45 harvard\*)) or ("cambridge's" not (massachusetts\* or boston\* or harvard\*)) or (canterbury not  
46 zealand\*) or ("canterbury's" not zealand\*) or chelmsford or "chelmsford's" or chester or  
47 "chester's" or chichester or "chichester's" or coventry or "coventry's" or derby or "derby's" or  
48 (durham not (carolina\* or nc)) or ("durham's" not (carolina\* or nc)) or ely or "ely's" or exeter or  
49 "exeter's" or gloucester or "gloucester's" or hereford or "hereford's" or hull or "hull's" or  
50 lancaster or "lancaster's" or leeds\* or leicester or "leicester's" or (lincoln not nebraska\*) or  
51 ("lincoln's" not nebraska\*) or (liverpool not (new south wales\* or nsw)) or ("liverpool's" not  
52 (new south wales\* or nsw)) or ((london not (ontario\* or ont or toronto\*)) or ("london's" not  
53 (ontario\* or ont or toronto\*)) or manchester or "manchester's" or (newcastle not (new south  
54 wales\* or nsw)) or ("newcastle's" not (new south wales\* or nsw)) or norwich or "norwich's" or  
55 nottingham or "nottingham's" or oxford or "oxford's" or peterborough or "peterborough's" or  
56 plymouth or "plymouth's" or portsmouth or "portsmouth's" or preston or "preston's" or ripon or  
57 "ripon's" or salford or "salford's" or salisbury or "salisbury's" or sheffield or "sheffield's" or  
58 southampton or "southampton's" or st albans or stoke or "stoke's" or sunderland or  
59 "sunderland's" or truro or "truro's" or wakefield or "wakefield's" or wells or westminster or  
60 "westminster's" or winchester or "winchester's" or wolverhampton or "wolverhampton's" or  
61 (worchester not (massachusetts\* or boston\* or harvard\*)) or ("worchester's" not (massachusetts\*  
62 or boston\* or harvard\*)) or (york not ("new york\*" or ny or ontario\* or ont or toronto\*)) or  
63 ("york's" not ("new york\*" or ny or ontario\* or ont or toronto\*)))) ) OR AF ( (bath or "bath's"

- 1  
2  
3  
4 or ((birmingham not alabama\*) or ("birmingham's" not alabama\*) or bradford or "bradford's" or  
5 brighton or "brighton's" or bristol or "bristol's" or carlisle\* or "carlisle's" or (cambridge not  
6 (massachusetts\* or boston\* or harvard\*)) or ("cambridge's" not (massachusetts\* or boston\* or  
7 harvard\*)) or (canterbury not zealand\*) or ("canterbury's" not zealand\*) or chelmsford or  
8 "chelmsford's" or chester or "chester's" or chichester or "chichester's" or coventry or  
9 "coventry's" or derby or "derby's" or (durham not (carolina\* or nc)) or ("durham's" not  
10 (carolina\* or nc)) or ely or "ely's" or exeter or "exeter's" or gloucester or "gloucester's" or  
11 hereford or "hereford's" or hull or "hull's" or lancaster or "lancaster's" or leeds\* or leicester or  
12 "leicester's" or (lincoln not nebraska\*) or ("lincoln's" not nebraska\*) or (liverpool not (new  
13 south wales\* or nsw)) or ("liverpool's" not (new south wales\* or nsw)) or ((london not (ontario\*  
14 or ont or toronto\*)) or ("london's" not (ontario\* or ont or toronto\*)) or manchester or  
15 "manchester's" or (newcastle not (new south wales\* or nsw)) or ("newcastle's" not (new south  
16 wales\* or nsw)) or norwich or "norwich's" or nottingham or "nottingham's" or oxford or  
17 "oxford's" or peterborough or "peterborough's" or plymouth or "plymouth's" or portsmouth or  
18 "portsmouth's" or preston or "preston's" or ripon or "ripon's" or salford or "salford's" or  
19 salisbury or "salisbury's" or sheffield or "sheffield's" or southampton or "southampton's" or st  
20 albans or stoke or "stoke's" or sunderland or "sunderland's" or truro or "truro's" or wakefield or  
21 "wakefield's" or wells or westminster or "westminster's" or winchester or "winchester's" or  
22 wolverhampton or "wolverhampton's" or (worcester not (massachusetts\* or boston\* or  
23 harvard\*)) or ("worcester's" not (massachusetts\* or boston\* or harvard\*)) or (york not ("new  
24 york\*" or ny or ontario\* or ont or toronto\*)) or ("york's" not ("new york\*" or ny or ontario\* or  
25 ont or toronto\*))))))
- 26 TI ( (bangor or "bangor's" or cardiff or "cardiff's" or newport or "newport's" or st asaph or "st  
27 asaph's" or st davids or swansea or "swansea's") ) OR AB ( (bangor or "bangor's" or cardiff or  
28 "cardiff's" or newport or "newport's" or st asaph or "st asaph's" or st davids or swansea or  
29 "swansea's") ) OR AF ( (bangor or "bangor's" or cardiff or "cardiff's" or newport or "newport's"  
30 or st asaph or "st asaph's" or st davids or swansea or "swansea's") )
- 31 S59
- 32 TI ( (aberdeen or "aberdeen's" or dundee or "dundee's" or edinburgh or "edinburgh's" or  
33 glasgow or "glasgow's" or inverness or (perth not australia\*) or ("perth's" not australia\*) or  
34 stirling or "stirling's") ) OR AB ( (aberdeen or "aberdeen's" or dundee or "dundee's" or  
35 edinburgh or "edinburgh's" or glasgow or "glasgow's" or inverness or (perth not australia\*) or  
36 ("perth's" not australia\*) or stirling or "stirling's") ) OR AF ( (aberdeen or "aberdeen's" or  
37 dundee or "dundee's" or edinburgh or "edinburgh's" or glasgow or "glasgow's" or inverness or  
38 (perth not australia\*) or ("perth's" not australia\*) or stirling or "stirling's") )
- 39 S60
- 40 TI ( (armagh or "armagh's" or belfast or "belfast's" or lisburn or "lisburn's" or londonderry or  
41 "londonderry's" or derry or "derry's" or newry or "newry's") ) OR AB ( (armagh or "armagh's"  
42 or belfast or "belfast's" or lisburn or "lisburn's" or londonderry or "londonderry's" or derry or  
43 "derry's" or newry or "newry's") ) OR AF ( (armagh or "armagh's" or belfast or "belfast's" or  
44 lisburn or "lisburn's" or londonderry or "londonderry's" or derry or "derry's" or newry or  
45 "newry's") )
- 46 S61
- 47 S62 S54 OR S55 OR S56 OR S57 OR S58 OR S59 OR S60 OR S61
- 48 ((MH "Africa+") OR (MH "America+") OR (MH "North America+") OR (MH "Latin  
49 America") OR (MH "Central America+") OR (MH "Antarctic Regions") OR (MH "Arctic  
50 Regions") OR (MH "Asia+") OR (MH "Asia, Western+") OR (MH "Asia, Central+") OR (MH  
51 "Australia+") OR (MH "New Zealand")) NOT ((MH "Europe+") OR (MH "Great Britain") OR  
52 (MH "United Kingdom+"))
- 53 S63
- 54 S64 S62 NOT S63
- 55 S65 PT case report or case study
- 56 S66 PT letter
- 57 (((MH "Animals+") OR (MH "Animal Studies") OR (TI "animal model\*")) NOT (MH  
58 "human"))
- 59 S67
- 60 S68 S65 OR S66 OR S67

1  
2  
3  
4 S69 S3 AND S24 AND S48  
5 S70 S3 AND S24 AND S53  
6  
7 S71 S69 OR S70  
8  
9 S72 S64 AND S71  
10 S73 S72 NOT S68  
11  
12  
13  
14  
15  
16  
17  
18  
19  
20  
21  
22  
23  
24  
25  
26  
27  
28  
29  
30  
31  
32  
33  
34  
35  
36  
37  
38  
39  
40  
41  
42  
43  
44  
45  
46  
47  
48  
49  
50  
51  
52  
53  
54  
55  
56  
57  
58  
59  
60

For peer review only



### Appendix S3.9: Search Strategies – Others

#### NICE Evidence Search (<https://www.evidence.nhs.uk>) –

Colorectal cancer and inequal\*

Colorectal cancer and depriv\*

NB. The repeat searches did not utilise NICE Evidence Search due to the website's closure.

#### Base search (<https://www.base-search.net>)

Limits placed - Content providers as United Kingdom and Document Type set to: Text (all) and Dataset and Unknown. This meant excluding: Musical Notation, Map, Audio, Software and Image/Video.

Colorectal cancer and inequal\*

Colorectal cancer and depriv\*

#### Google Advanced Search ([https://www.google.com/advanced\\_search](https://www.google.com/advanced_search))

Colorectal cancer and inequal\*

Colorectal cancer and depriv\*

Limited to the first 5 pages of results unless the search still appeared relevant, in which case the search would have continued.

## Appendix S4: Development and Validation of the Search Strategy and Record Management

The search was developed in MEDLINE using free-text words and subject indexing terms and subsequently adapted for the other databases. Briefly, the search strategies combined different concepts:

- Colorectal cancer *and* socioeconomic inequalities *and* system interval *and* the UK
- Or, colorectal cancer *and* socioeconomic inequalities *and* treatment *and* the UK

Search filters were used to focus on UK-based studies and exclude non-human studies to improve specificity.<sup>45,46</sup> The search strategy was reviewed by SG using the Peer Review of Electronic Search Strategies for systematic reviews guideline.<sup>47</sup>

Two systematic reviews provided the initial search strategy for the treatment, interval and socioeconomic inequality concepts.<sup>48,49</sup> Further search terms were identified from search filters.<sup>50-52</sup> Thirty-five potentially relevant studies were subsequently used to identify further search terms using MeSH Analyzer, a word frequency analysis tool.<sup>53</sup>

The search strategy was tested against a set of the 35 known, potentially relevant records. The results of the draft MEDLINE search strategy found 31 of 35 potentially relevant articles. The search was subsequently refined and was able to capture one further article. However, no other changes to the strategy were possible due to a lack of possible candidate search terms in the title/abstract or subject indexing terms of the remaining three uncaptured articles.

The authors of the current systematic review also conducted an almost identical systematic review about ovarian cancer. For this reason, some of the studies used in the development process were about ovarian cancer. However, this development process enhanced the search strategy for both systematic reviews. The potentially relevant studies are referenced here. Not all were necessarily deemed eligible for inclusion in either of the final two systematic reviews. <sup>4,6-10,12-15,17-20,23-26,28,29,34-39,54-62</sup>

Search results were imported into EndNote X9,<sup>42</sup> and duplicates were removed using adapted EndNote de-duplication methods published by Bramer et al., 2016.<sup>63</sup> The remaining search results were transferred to Covidence systematic review software.<sup>64</sup>

## Appendix S5: Data items and effect measures

The following data were extracted: first author, year of publication, data source, region/country, years of diagnosis, site (colon vs rectal), stage, size of the analytical cohort, measure of socioeconomic status, and the number of socioeconomic groups. Assumptions about missing or unclear information were clearly stated.

For all included studies, data for the following outcomes were extracted:

- Measures of the system interval length, including precise definitions of the time intervals.
  - Effects of socioeconomic factors on the system interval were assessed using coefficients from regression analyses.
  - Or else rates of patients meeting targets were extracted. The odds of meeting targets amongst patients from the most deprived group compared to the least deprived group were calculated. 95% confidence intervals were calculated using RevMan 5.4.<sup>65</sup>
- Cancer-directed therapy received, including the timescale and definitions of treatment. The extracted effect measures were:
  - Adjusted estimates for the likelihood of a particular treatment for the most deprived socioeconomic groups, with 95% confidence intervals. Details of confounding variables were also extracted.
  - If unavailable, unadjusted rates were extracted. The odds of treatment amongst patients from the most deprived group compared to the least deprived group were calculated. 95% confidence intervals were calculated using RevMan 5.4.<sup>65</sup> Statistical tests of association were reported when available.

## Appendix S6: Study Risk of Bias Assessment

|                               | Selection bias     |                    |                                               |                                               | Prognostic factor measurement                                                      | Outcome measurement                          | Study confounding                                                   | Statistical reporting                          | Strength of Evidence |
|-------------------------------|--------------------|--------------------|-----------------------------------------------|-----------------------------------------------|------------------------------------------------------------------------------------|----------------------------------------------|---------------------------------------------------------------------|------------------------------------------------|----------------------|
| First author (Date published) | Inclusion criteria | Exclusion criteria | Baseline characteristics adequately described | Source and time period adequate and described | Clear and valid definition of socioeconomic status, measurement and categorisation | Clear definition and methods for the outcome | Important potential confounding factors appropriately accounted for | Appropriate analysis and all outcomes reported |                      |
| Bailey (2002)                 | High               | High               | Moderate                                      | High                                          | High                                                                               | High                                         | High                                                                | High                                           | Weak                 |
| Bharathan (2011)              | Moderate           | Moderate           | Low                                           | Moderate                                      | Moderate                                                                           | High                                         | High                                                                | High                                           | Weak                 |
| Benitez Majano (2022) [1]     | Low                | Low                | Low                                           | Moderate                                      | Low                                                                                | Low                                          | Low                                                                 | Low                                            | Strong               |
| Benitez Majano (2022) [2]     | Low                | Low                | Low                                           | Moderate                                      | Low                                                                                | Low                                          | Low                                                                 | Low                                            | Strong               |
| Boyle (2020)                  | Low                | Low                | Low                                           | Low                                           | Low                                                                                | Low                                          | Low                                                                 | Low                                            | Strong               |
| Campbell (2002)               | High               | High               | Low                                           | High                                          | Low                                                                                | Moderate                                     | Moderate                                                            | High                                           | Weak                 |
| Crawford (2012)               | Moderate           | Moderate           | High                                          | Moderate                                      | Moderate                                                                           | High                                         | Moderate                                                            | High                                           | Weak                 |
| Di Girolamo (2018)            | Low                | Low                | Low                                           | Low                                           | Low                                                                                | Low                                          | Moderate                                                            | Low                                            | Strong               |
| Fenton (2019)                 | Low                | Low                | Low                                           | Low                                           | Low                                                                                | Low                                          | Low                                                                 | Low                                            | Strong               |
| Fenton (2020)                 | Low                | Low                | Low                                           | Low                                           | Low                                                                                | Low                                          | Low                                                                 | Low                                            | Strong               |
| Harris (2009)                 | Moderate           | High               | Low                                           | High                                          | Low                                                                                | High                                         | High                                                                | High                                           | Weak                 |
| Hassan (2023)                 | Low                | Low                | Low                                           | Low                                           | Low                                                                                | Low                                          | Moderate                                                            | Low                                            | Strong               |
| Hayes (2019)                  | Low                | Moderate           | Low                                           | Moderate                                      | Low                                                                                | Moderate                                     | Low                                                                 | Low                                            | Strong               |
| Hayes (2021)                  | Low                | Low                | Low                                           | Moderate                                      | Low                                                                                | Moderate                                     | Low                                                                 | Low                                            | Strong               |
| Hole (2002)                   | Moderate           | High               | Low                                           | Moderate                                      | Moderate                                                                           | High                                         | High                                                                | High                                           | Weak                 |
| Jones (2008)                  | Moderate           | Moderate           | High                                          | Moderate                                      | Moderate                                                                           | High                                         | Moderate                                                            | Moderate                                       | Weak                 |

Appendix S6: Study Risk of Bias Assessment - CONTINUED

|                                             | Selection bias     |                    |                                               |                                               | Prognostic factor measurement                                                      | Outcome measurement                          | Study confounding                                                   | Statistical reporting                          | Strength of Evidence |
|---------------------------------------------|--------------------|--------------------|-----------------------------------------------|-----------------------------------------------|------------------------------------------------------------------------------------|----------------------------------------------|---------------------------------------------------------------------|------------------------------------------------|----------------------|
| First author (Date published)               | Inclusion criteria | Exclusion criteria | Baseline characteristics adequately described | Source and time period adequate and described | Clear and valid definition of socioeconomic status, measurement and categorisation | Clear definition and methods for the outcome | Important potential confounding factors appropriately accounted for | Appropriate analysis and all outcomes reported |                      |
| Lejeune (2010)                              | Low                | Low                | Low                                           | Low                                           | Low                                                                                | High                                         | Moderate                                                            | Moderate                                       | Moderate             |
| McLeod (1999)                               | Moderate           | Moderate           | High                                          | Moderate                                      | Low                                                                                | Low                                          | High                                                                | High                                           | Weak                 |
| Morris (2008)                               | Low                | Low                | Low                                           | Low                                           | Low                                                                                | Low                                          | Moderate                                                            | Low                                            | Strong               |
| Morris (2010)                               | Low                | Moderate           | Low                                           | Low                                           | Low                                                                                | Low                                          | Low                                                                 | Low                                            | Strong               |
| Morris (2016)                               | Moderate           | High               | Low                                           | Low                                           | Low                                                                                | Low                                          | High                                                                | High                                           | Weak                 |
| National Cancer Intelligence Network (2011) | Low                | Low                | High                                          | Low                                           | High                                                                               | Low                                          | High                                                                | High                                           | Weak                 |
| NCRAS (2018)                                | Low                | Low                | Low                                           | Low                                           | Low                                                                                | Low                                          | High                                                                | Moderate                                       | Moderate             |
| Neal (2005)                                 | High               | High               | High                                          | Moderate                                      | Low                                                                                | High                                         | High                                                                | Moderate                                       | Weak                 |
| Nicholson (2012)                            | Moderate           | Moderate           | Low                                           | High                                          | High                                                                               | Moderate                                     | Moderate                                                            | High                                           | Weak                 |
| Paterson (2014)                             | Moderate           | Moderate           | Low                                           | Moderate                                      | Low                                                                                | High                                         | Moderate                                                            | High                                           | Weak                 |
| Pearson (2019)                              | Low                | Low                | Low                                           | Low                                           | Low                                                                                | Low                                          | Low                                                                 | Low                                            | Strong               |
| Pitchforth (2002)                           | Low                | Low                | Low                                           | Moderate                                      | Moderate                                                                           | Moderate                                     | High                                                                | Moderate                                       | Moderate             |
| Pollock and Vickers (1998)                  | Moderate           | Moderate           | High                                          | High                                          | Low                                                                                | Moderate                                     | High                                                                | High                                           | Weak                 |
| Price (2020)                                | Low                | Low                | Moderate                                      | Low                                           | Low                                                                                | Low                                          | Moderate                                                            | Low                                            | Strong               |

## Appendix S6: Study Risk of Bias Assessment - CONTINUED

|                               | Selection bias     |                    |                                               |                                               | Prognostic factor measurement                                                      | Outcome measurement                          | Study confounding                                                   | Statistical reporting                          | Strength of Evidence |
|-------------------------------|--------------------|--------------------|-----------------------------------------------|-----------------------------------------------|------------------------------------------------------------------------------------|----------------------------------------------|---------------------------------------------------------------------|------------------------------------------------|----------------------|
| First author (Date published) | Inclusion criteria | Exclusion criteria | Baseline characteristics adequately described | Source and time period adequate and described | Clear and valid definition of socioeconomic status, measurement and categorisation | Clear definition and methods for the outcome | Important potential confounding factors appropriately accounted for | Appropriate analysis and all outcomes reported |                      |
| Radwan (2016)                 | Moderate           | Moderate           | Moderate                                      | Moderate                                      | Moderate                                                                           | High                                         | High                                                                | High                                           | Weak                 |
| Raine (2010)                  | Low                | Low                | Low                                           | Moderate                                      | Low                                                                                | Moderate                                     | High                                                                | High                                           | Weak                 |
| Redanial (2014)               | Low                | Low                | Low                                           | Low                                           | Low                                                                                | Low                                          | Moderate                                                            | Moderate                                       | Strong               |
| Saito (2019) [1]              | Low                | Low                | Low                                           | Low                                           | Low                                                                                | Low                                          | Low                                                                 | Low                                            | Strong               |
| Saito (2021) [2]              | Low                | Low                | Low                                           | Low                                           | Low                                                                                | Low                                          | Low                                                                 | Low                                            | Strong               |
| Shack (2009)                  | Low                | Low                | Low                                           | Moderate                                      | Low                                                                                | Moderate                                     | Low                                                                 | Moderate                                       | Strong               |
| Smith (2006)                  | Moderate           | Moderate           | Low                                           | High                                          | Low                                                                                | High                                         | High                                                                | High                                           | Weak                 |
| Taylor (2021)                 | Low                | Low                | Low                                           | Low                                           | Low                                                                                | Low                                          | Low                                                                 | Low                                            | Strong               |
| Tilney (2008)                 | Moderate           | High               | Low                                           | Moderate                                      | Low                                                                                | Low                                          | High                                                                | Moderate                                       | Weak                 |
| Tilney (2009)                 | Moderate           | Moderate           | Low                                           | High                                          | Low                                                                                | Low                                          | High                                                                | High                                           | Weak                 |
| Vallance (2018)               | Low                | Low                | Low                                           | Low                                           | Low                                                                                | Low                                          | Low                                                                 | Low                                            | Strong               |

## Appendix S7: Characteristics of Included Studies

| First Author<br>(Year)           | Data Source                               | Region/Country           | Site       | Stage      | Years Studied                                | Measure of SES<br>(No. Groups)             | Broad Outcome                                              |
|----------------------------------|-------------------------------------------|--------------------------|------------|------------|----------------------------------------------|--------------------------------------------|------------------------------------------------------------|
| <b>Bailey (2002)</b>             | Patients enrolled from six study centres. | England (Not Specified)  | Colorectal | Dukes' C   | Not recorded                                 | Economic Resources Domain - OARS OMFAQ (2) | Chemotherapy                                               |
| <b>Benitez Majano [1] (2022)</b> | Cancer Registration Data, CPRD, HES.      | England                  | Colon      | All stages | Diagnosed 2011-2015                          | IMD 2015 (5)                               | System Interval                                            |
| <b>Benitez Majano [2] (2022)</b> | Cancer Registration Data, CPRD, HES.      | England                  | Colorectal | All stages | Diagnosed 2011-2015                          | IMD 2015 (5)                               | System Interval                                            |
| <b>Bharathan (2011)</b>          | Colorectal Cancer Audit Group Database.   | Northern England         | Colorectal | All stages | Admitted/Referred to Surgical Unit 1998-2002 | IMD 2004 – without health (5)              | Surgery                                                    |
| <b>Boyle (2020)</b>              | NBOCA, HES, SACT.                         | England                  | Colon      | Stage III  | Diagnosed 2014-2017                          | IMD (5)                                    | Chemotherapy                                               |
| <b>Campbell (2002)</b>           | Case notes. Scottish Cancer Registry.     | North/Northeast Scotland | Colorectal | All stages | Diagnosed 1995-1996                          | Carstairs Index 1991 (5)                   | Chemotherapy<br>Radiotherapy<br>Surgery<br>System Interval |
| <b>Crawford (2012)</b>           | Northern and Yorkshire Cancer Registry.   | Northern England         | Colorectal | All stages | Diagnosed 1994-2002                          | IMD - without access to services (4)       | Any Treatment<br>Chemotherapy                              |
| <b>Di Girolamo (2018)</b>        | Cancer Registration Data, NBOCA, CWT.     | England                  | Colorectal | All stages | Diagnosed 2009-2013                          | IMD Assumed 2007 - Income Domain (5)       | System Interval                                            |
| <b>Fenton (2019)</b>             | CORECT-R, Cancer Registration Data, HES.  | England                  | Colorectal | All stages | Major resection for CRC in 2005-2012         | IMD 2010 – Income Domain (5)               | Liver Resection                                            |

## Appendix S7: Characteristics of Included Studies - CONTINUED

| First Author<br>(Year) | Data Source                                                    | Region/Country      | Site       | Stage                | Years Studied                               | Measure of SES<br>(No. Groups)                 | Broad Outcome                           |
|------------------------|----------------------------------------------------------------|---------------------|------------|----------------------|---------------------------------------------|------------------------------------------------|-----------------------------------------|
| <b>Fenton (2021)</b>   | CORECT-R, Cancer Registration Data, HES.                       | England             | Colorectal | All stages           | Major resection for CRC in 2005-2013        | IMD 2010 – Income Domain (5)                   | Pulmonary Resection                     |
| <b>Harris (2009)</b>   | Database of patients at an MDT                                 | Birmingham, England | Rectal     | Assumed all stages   | Diagnosed 2000-2007                         | IMD 2004 - Assumed Income Domain (5)           | Surgery                                 |
| <b>Hassan (2023)</b>   | Cancer Registration Data, ONS, SACT.                           | England             | Colon      | Stage III            | Diagnosed 2012-2017                         | IMD 2015 & 2019 (5)                            | Combination Chemotherapy                |
| <b>Hayes (2019)</b>    | Northern and Yorkshire Cancer Registry, HES.                   | Northern England    | Colon      | All stages           | Diagnosed 1999-2010                         | IMD - Income Domain (5)                        | Chemotherapy<br>Surgery                 |
| <b>Hayes (2021)</b>    | Northern and Yorkshire Cancer Registry, HES.                   | Northern England    | Colorectal | All stages           | Diagnosed 2001-2010                         | IMD 2007 & 2010 - Income Domain (5)            | System Interval                         |
| <b>Hole (2002)</b>     | Audit in eight hospitals.                                      | Central Scotland    | Colorectal | All stages           | Resection in 1991-1994                      | Carstairs Index 1991 (3)                       | Chemotherapy                            |
| <b>Jones (2008)</b>    | Yorkshire Registry and Northern and Yorkshire Cancer Registry. | Northern England    | Colorectal | All stages           | Diagnosed 1994-2002                         | IMD 2004 – without access domain (scored 0-80) | Chemotherapy<br>Radiotherapy<br>Surgery |
| <b>Lejeune (2010)</b>  | Northern and Yorkshire Cancer Registry, TCR, ECRIC.            | England             | Colorectal | All stages           | Diagnosed 1997-2000                         | Townsend Index 2001 (5)                        | Any Treatment<br>System Interval        |
| <b>McLeod (1999)</b>   | Hospital Discharge Data (SMR1).                                | Scotland            | Colorectal | All stages (assumed) | First Inpatient Treatment For CRC 1990-1994 | Carstairs Index 1999 (4)                       | Chemotherapy                            |



Appendix S7: Characteristics of Included Studies - CONTINUED

| First Author (Year) | Data Source                                 | Region/Country          | Site       | Stage                           | Years Studied                        | Measure of SES (No. Groups)                | Broad Outcome                                              |
|---------------------|---------------------------------------------|-------------------------|------------|---------------------------------|--------------------------------------|--------------------------------------------|------------------------------------------------------------|
| Morris (2008)       | Cancer Registration Data, HES.              | England                 | Rectal     | All stages who had APER or AR   | Diagnosed 1998-2004                  | IMD 2004 – Income Domain (5)               | APER vs AR                                                 |
| Morris (2010)       | Cancer Registration Data, HES.              | England                 | Colorectal | All stages                      | Major resection for CRC in 1998-2004 | IMD 2004 – Income Domain (5)               | Liver Resection                                            |
| Morris (2016)       | Cancer Registration Data, HES, RTDS.        | England                 | Rectal     | All stages post major resection | Diagnosed 2009-2010                  | IMD – Income Domain (5)                    | Radiotherapy                                               |
| Neal (2005)         | National Survey of NHS Patients: Cancer     | England (Not Specified) | Colorectal | Not recorded                    | Not recorded                         | Occupation (8)                             | System Interval                                            |
| NCIN (2011)         | Cancer Registration Data, HES.              | England                 | Colorectal | All stages                      | Diagnosed 2004-2006                  | IMD – assumed (5)                          | Surgery                                                    |
| NCRAS (2018)        | Cancer Registration Data, HES, SACT.        | England                 | Colorectal | All stages                      | Diagnosed 2013-2015                  | IMD 2015 – Income Domain (5)               | Chemotherapy<br>Radiotherapy<br>Surgery                    |
| Nicholson (2012)    | Clinical Audit Database.                    | West of Scotland        | Rectal     | All stages                      | Surgery in 2001-2005                 | Not recorded                               | APER vs AR                                                 |
| Paterson (2014)     | Southeast Scotland Cancer Network Database. | Southeast Scotland      | Colorectal | All stages                      | Diagnosed 2003-2009                  | Scottish Index of Multiple Deprivation (5) | Chemotherapy<br>Radiotherapy<br>Surgery<br>System Interval |

## Appendix S7: Characteristics of Included Studies - CONTINUED

| First Author<br>(Year)   | Data Source                                    | Region/Country         | Site       | Stage                | Years Studied                                                       | Measure of SES<br>(No. Groups)          | Broad Outcome                   |
|--------------------------|------------------------------------------------|------------------------|------------|----------------------|---------------------------------------------------------------------|-----------------------------------------|---------------------------------|
| <b>Pearson (2019)</b>    | Cancer Registration Data, CWT, DID, HES, RtD.  | England                | Colorectal | All stages           | Diagnosed 2014-2015                                                 | IMD 2015 – Income Domain (5)            | System Interval                 |
| <b>Pitchforth (2002)</b> | Scottish Cancer Registration, SMR1.            | Scotland               | Colorectal | All stages (Assumed) | Diagnosed 1992-1996                                                 | Carstairs Index (4)                     | Chemotherapy                    |
| <b>Pollock (1998)</b>    | HES, ONS.                                      | Thames Region, England | Colorectal | Not recorded         | Inpatient FCE with a CRC diagnosis in the financial years 1992-1995 | Townsend Score (10)                     | Surgery                         |
| <b>Price (2020)</b>      | CPRD, Cancer Registration Data, ONS.           | England                | Colorectal | All stages (Assumed) | Diagnosed 2006-2017                                                 | Townsend Score 2001 (5)                 | System Interval                 |
| <b>Radwan (2016)</b>     | Swansea Pelvic Oncology Group Database.        | Swansea, Wales         | Rectal     | All stages           | Pelvic exenteration in 2006-2014                                    | Welsh Index of Multiple Deprivation (4) | Chemo – radiotherapy TPE vs PPE |
| <b>Raine (2010)</b>      | HES                                            | England                | Rectal     | All stages (Assumed) | Admission for rectal cancer surgery 1999-2006                       | IMD 2004 (5)                            | AR vs APER                      |
| <b>Redanial (2014)</b>   | Northern and Yorkshire and South West Offices. | England                | Colorectal | Dukes' Stages A/B    | Diagnosed 1996-2009                                                 | IMD 2007 – Income Domain (5)            | System Interval                 |
| <b>Saito [1] (2019)</b>  | Cancer Registration Data, HES, NBOCA.          | England                | Colorectal | All stages           | Diagnosed 2010-2013                                                 | IMD 2010 – Income Domain (5)            | Surgery                         |
| <b>Saito [2] (2021)</b>  | Cancer Registration Data, HES, NBOCA.          | England                | Colon      | All stages           | Diagnosed 2010-2013                                                 | IMD 2010 – Income Domain (5)            | System Interval                 |

Appendix S7: Characteristics of Included Studies - CONTINUED

| First Author (Year) | Data Source                                                   | Region/Country    | Site       | Stage        | Years Studied                                                 | Measure of SES (No. Groups)  | Broad Outcome                           |
|---------------------|---------------------------------------------------------------|-------------------|------------|--------------|---------------------------------------------------------------|------------------------------|-----------------------------------------|
| Shack (2009)        | Northwest and Merseyside and Cheshire Cancer Registries, HES. | Northwest England | Colorectal | All stages   | Diagnosed 1997-2004                                           | IMD 2001 – Income Domain (5) | Chemotherapy<br>Surgery<br>Radiotherapy |
| Smith (2006)        | ACPGBI Bowel Cancer Database                                  | England           | Colorectal | All stages   | Diagnosed 2001-2002                                           | Townsend Score 2001 (4)      | APER vs AR                              |
| Taylor (2021)       | CORECT-R, HES, SACT.                                          | England           | Colorectal | Stage II-III | Diagnosed 2014-2015                                           | IMD 2010 – Income Domain (5) | Chemotherapy                            |
| Tilney (2008)       | HES.                                                          | England           | Colorectal | Not recorded | APER or AR surgery in 1996-2004                               | IMD 2004 (5)                 | APER vs AR                              |
| Tilney (2009)       | ACPGBI Bowel Cancer Database                                  | England           | Rectal     | Dukes’ A-C   | Diagnosed in 2000-2005                                        | IMD 2004 (5)                 | APER vs AR                              |
| Vallance (2018)     | HES, NBOCA.                                                   | England           | Colorectal | Stage IV     | Diagnosed 2011-2015 with synchronous liver-limited metastases | IMD (5)                      | Liver resection                         |

Abbreviations: ACPGBI Association of Coloproctology of Great Britain and Ireland, APER Abdominoperineal Resection, AR Anterior Resection, CORECT-R Colorectal Cancer Data Repository, CRC Colorectal Cancer, CPRD Clinical Practice Research Datalink, CWT National Cancer Waiting Times Dataset, DID Diagnostic Imaging Dataset, ECRIC Eastern Cancer Registration and Information Centre, FCE Finished Consultant Episode, HES hospital episode statistics, IMD index of multiple deprivation, NBOCA National Bowel Cancer Audit, NCIN National Cancer Intelligence Network, NCRAS National Cancer Registration and Analysis Service, OARS The Duke Older Americans Resources and Services Instrument, OMFAQ The OARS Multidimensional Functional Assessment Questionnaire, ONS Office for National Statistics, PPE Partial

1  
2  
3 Pelvic Exenteration, RtD Routes to Diagnosis, RTDS Radiotherapy Dataset, SACT systematic anti-cancer therapy dataset, SES socioeconomic status, SMR1 Scottish  
4 Morbidity Record-1, TCR Thames Cancer Registry, TPE Total Pelvic Exenteration.  
5  
6  
7  
8  
9  
10  
11  
12  
13  
14  
15  
16  
17  
18  
19  
20  
21  
22  
23  
24  
25  
26  
27  
28  
29  
30  
31  
32  
33  
34  
35  
36  
37  
38  
39  
40  
41  
42  
43  
44  
45  
46

For peer review only

Appendix S8: Results of studies reporting variations in the system interval

| First Author<br>(Year)               | Number   | Adjusted for                                        | Outcome of Interest                         | Odds ratio (95% CI) or other<br>measure                                                                                                          | Effect of<br>deprivation on<br>interval length<br>[Longer↑ Shorter↓] | Strength<br>of<br>Evidence |
|--------------------------------------|----------|-----------------------------------------------------|---------------------------------------------|--------------------------------------------------------------------------------------------------------------------------------------------------|----------------------------------------------------------------------|----------------------------|
| <b>Benitez Majano<br/>(2022) [1]</b> | 2,115    | Age   Comorbidities   GP Visits  <br>Sex   Symptoms | First presentation to<br>diagnosis interval | Quantile Regression - 50 <sup>th</sup> centile*<br>Ref adj interval 126.0 (94.5,157.5) †<br>MD adj interval 204.1 days<br>(151.0,257.3)   p=0.04 | ↑                                                                    | Strong                     |
| <b>Benitez Majano<br/>(2022) [2]</b> | C: 3,215 | Age   Comorbidities   Sex  <br>Symptoms   Test Type | Test to diagnosis<br>interval               | Quantile Regression - 50 <sup>th</sup> centile*<br>LD ref group<br>MD adj coef 0.7<br>(-2.7,4.1)   p=0.729                                       | =                                                                    | Strong                     |
|                                      |          | Age   Comorbidities   Sex  <br>Symptoms             | First presentation to<br>diagnosis interval | Quantile Regression - 50 <sup>th</sup> centile*<br>LD ref group<br>MD adj coef 91.0<br>(21.0,161.0)   p=0.028                                    | ↑                                                                    |                            |
|                                      | R: 1,621 | Age   Comorbidities   Sex  <br>Symptoms   Test Type | Test to diagnosis<br>Interval               | Quantile Regression - 50 <sup>th</sup> centile*<br>LD ref group<br>MD adj coef 0.0<br>(-4,0.4)   p=1.00                                          | =                                                                    |                            |
|                                      |          | Age   Comorbidities   Sex  <br>Symptoms             | First presentation to<br>diagnosis interval | Quantile Regression - 50 <sup>th</sup> centile*<br>LD ref group<br>MD adj coef 78.8<br>(14.8,142.7)   p=0.258                                    | =                                                                    |                            |

## Appendix S8: Results of studies reporting variations in the system interval – CONTINUED

| First Author<br>(Year)        | Number  | Adjusted for                              | Outcome of Interest                                        | Odds ratio (95% CI) or other<br>measure                        | Effect of deprivation<br>on interval length<br>[Longer↑ Shorter↓] | Strength<br>of<br>Evidence |
|-------------------------------|---------|-------------------------------------------|------------------------------------------------------------|----------------------------------------------------------------|-------------------------------------------------------------------|----------------------------|
| <b>Campbell<br/>(2002)</b>    | 653     | Distance   Presentation  <br>Stage        | Referral to treatment interval                             | Cox Regression<br>LD HR 1.0<br>MD adjusted HR 1.24 (0.93,1.67) | =                                                                 | Weak                       |
| <b>Di Girolamo<br/>(2018)</b> | 50,955  | No adjustment                             | Referral to first seen interval<br>[Within 2 weeks Y/N]    | (Derived)<br>LD OR 1.0<br>MD OR 0.80 (0.70-0.91)               | ↑                                                                 | Strong                     |
|                               | 46,702  |                                           | Referral to treatment interval<br>[Within 62 days Y/N]     | (Derived)<br>LD OR 1.0<br>MD OR 1.02 (0.95-1.10)               | =                                                                 |                            |
|                               | 116,177 |                                           | Diagnosis to treatment interval<br>[Within 31 days Y/N]    | (Derived)<br>LD OR 1.0<br>MD OR 1.28 (1.14-1.44)               | ↓                                                                 |                            |
| <b>Hayes (2021)</b>           | 19,798  | Age   Site   Stage                        | Referral to first seen interval<br>[Within 2 weeks Y/N]    | LD OR 1.0<br>MD adjusted OR 0.95 (0.87,1.03)                   | =                                                                 | Strong                     |
|                               | 29,445  | Age   First Treatment   Sex  <br>Stage    | Diagnosis to treatment interval<br>[Within 31 days Y/N]    | LD OR 1.0<br>MD adjusted OR 0.91 (0.84,0.98)                   | ↑                                                                 |                            |
|                               | 17,622  | Age   First Treatment   Stage<br>  Others | Referral to treatment interval<br>[Within 62 days Y/N]     | LD OR 1.0<br>MD adjusted OR 0.82 (0.74,0.91)                   | ↑                                                                 |                            |
| <b>Lejeune<br/>(2010)</b>     | 71,917  | Age   Stage                               | Diagnosis to treatment interval<br>[Within 1 week Y/N]     | LD OR 1.0<br>MD adjusted OR 0.78 (0.72,0.84)                   | ↑                                                                 | Moderate                   |
|                               |         |                                           | Diagnosis to treatment interval<br>[Within 1 month Y/N]    | LD OR 1.0<br>MD adjusted OR 0.84 (0.78,0.90)                   | ↑                                                                 |                            |
|                               |         |                                           | Diagnosis to treatment interval<br>[Within 2-3 months Y/N] | LD OR 1.0<br>MD adjusted OR 0.91 (0.85,0.98)                   | ↑                                                                 |                            |
|                               |         |                                           | Diagnosis to treatment interval<br>[Within 4-6 months Y/N] | LD OR 1.0<br>MD adjusted OR 1.07 (0.96,1.18)                   | =                                                                 |                            |

Appendix S8: Results of studies reporting variations in the system interval - CONTINUED

| First Author (Year) | Number  | Adjusted for                                                                     | Outcome of Interest                                                                                | Odds ratio (95% CI) or other measure                                          | Effect of deprivation on interval length [Longer↑ Shorter↓] | Strength of Evidence |
|---------------------|---------|----------------------------------------------------------------------------------|----------------------------------------------------------------------------------------------------|-------------------------------------------------------------------------------|-------------------------------------------------------------|----------------------|
| Neal (2005)         | 15,891  | Age   Ethnicity   Marital Status   Sex                                           | Symptom to diagnosis interval                                                                      | Generalised linear modelling<br>Nonsignificant result                         | =                                                           | Weak                 |
|                     |         |                                                                                  | Referral to first seen interval                                                                    | Generalised linear modelling<br>Nonsignificant result                         | =                                                           |                      |
|                     |         |                                                                                  | First seen to diagnosis interval                                                                   | Generalised linear modelling<br>F(7) = 2.247, p=0.028                         | o                                                           |                      |
| Paterson (2014)     | 4,915   | Unadjusted                                                                       | Referral to treatment interval [Within 62 days Y/N]                                                | (Derived)<br>LD OR 1.0<br>MD OR 1.14 (0.93-1.39)                              | =                                                           | Weak                 |
| Pearson (2019)      | 63,958  | Age   Comorbidities   Ethnicity   Investigations   Presentation   Sex   Stage    | Secondary care diagnostic interval [Interval longer than the median Y/N]                           | LD OR 1.0<br>MD adjusted OR 1.07 (1.00,1.13)                                  | =                                                           | Strong               |
| Price (2020)        | Unknown | Age   Sex   Time Period                                                          | First presentation to diagnosis interval                                                           | Pre-post difference-in-differences<br>MD coef 0.1 (-0.03,0.2, p=0.147)        | =                                                           | Strong               |
|                     |         |                                                                                  |                                                                                                    | Event-study difference-in-differences<br>MD coef 0.069 (0.002,0.136, p=0.043) | ↑                                                           |                      |
|                     |         |                                                                                  |                                                                                                    | Semiparametric varying-coefficient analyses<br>Significant association        | ↑                                                           |                      |
| Redanial (2014)     | 46,511  | Age   Ethnicity   Grade   Morphology   Region   Sex   Site   Stage   Time Period | Diagnosis to Treatment Interval [Amongst patients who had a resection within 62 days of diagnosis] | Linear Regression<br>LD coef 0.00<br>MD adj coef 0.21 (-0.55,0.98)            | =                                                           | Strong               |

## Appendix S8: Results of studies reporting variations in the system interval - CONTINUED

| First Author<br>(Year)      | Number | Adjusted for                                                                                              | Outcome of Interest                                                                                                         | Odds ratio (95% CI) or other<br>measure                                                          | Effect of deprivation<br>on interval length<br>[Longer↑ Shorter↓] | Strength<br>of<br>Evidence |
|-----------------------------|--------|-----------------------------------------------------------------------------------------------------------|-----------------------------------------------------------------------------------------------------------------------------|--------------------------------------------------------------------------------------------------|-------------------------------------------------------------------|----------------------------|
| <b>Saito (2021)<br/>[2]</b> | 28,452 | Age   Comorbidities   Grade<br>  Morphology   Presentation  <br>Sex   Site   Stage   Year of<br>Diagnosis | Diagnosis to Treatment Interval<br>[Time from diagnosis to major<br>resection amongst patients who had<br>elective surgery] | Linear Regression<br>LD adjusted coefficient 1.00<br>MD adjusted coefficient 0.99<br>(0.97,1.02) | =                                                                 | Strong                     |

Abbreviations: Adj adjusted, C colon, Coef coefficient, GP general practitioner, LD least deprived, MD most deprived, R rectal, Ref reference group.

\*Results also presented for the 75<sup>th</sup> centile

†The reference group was men aged 55 to 64 years old in the least deprived group with no recorded comorbidities or mental health morbidities and who had rectal bleeding or a change in bowel habit.

### Legend

|                        |                        |                                            |                                    |
|------------------------|------------------------|--------------------------------------------|------------------------------------|
| ↑ Increased likelihood | ↓ Decreased likelihood | = No significant difference between groups | ° Significant association observed |
|------------------------|------------------------|--------------------------------------------|------------------------------------|



## Appendix S9: Results – Likelihood of receipt of surgery

| First Author (Year)     | Treatment Given Within                     | Number  | Adjusted for                                                                   | Outcome of Interest                                         | Odds Ratio /Likelihood               | 95% CI (p-value)       | Effect of Deprivation on Odds of Surgery | Strength of Evidence |
|-------------------------|--------------------------------------------|---------|--------------------------------------------------------------------------------|-------------------------------------------------------------|--------------------------------------|------------------------|------------------------------------------|----------------------|
| <b>Bharathan (2011)</b> | Not recorded                               | 8,159   | Unadjusted                                                                     | Receipt of surgery [NS] (assumed part of primary treatment) | (Derived)<br>LD OR 1.0<br>MD OR 0.71 | (Derived)<br>0.51-0.97 | ↓                                        | Weak                 |
| <b>Campbell (2002)</b>  | 1 year of diagnosis                        | 653     | Age   Distance   Stage                                                         | Receipt of surgery [NS] (assumed part of primary treatment) | LD OR 1.0<br>MD OR 0.52              | 0.14-1.87              | =                                        | Weak                 |
| <b>Fenton (2019)</b>    | 3 years of primary colorectal resection    | 157,383 | Age   Comorbidities   Sex   Site   Liver Centre   Stage   Year of Resection    | Receipt of Liver Resection                                  | LD OR 1.0<br>MD OR 0.76              | 0.70-0.83              | ↓                                        | Strong               |
| <b>Fenton (2021)</b>    | 3 years of primary colorectal resection    | 80,869  | Age   Comorbidities   Sex   Site   Thoracic Centre   Stage   Year of Resection | Receipt of Pulmonary Resection                              | LD OR 1.0<br>MD OR 1.04              | 0.89-1.22              | =                                        | Strong               |
| <b>Harris (2009)</b>    | Received during the study period (assumed) | 477     | Unadjusted                                                                     | Receipt of surgery [NS] (assumed part of primary treatment) | (Derived)<br>LD OR 1.0<br>MD OR 0.32 | (Derived)<br>0.13-0.72 | ↓                                        | Weak                 |
| <b>Hayes (2019)</b>     | 12 months of diagnosis (assumed)           | 31,910  | Age   Comorbidities   Sex   Stage   Year of Diagnosis                          | Receipt of surgery [NS] (assumed part of primary treatment) | LD OR 1.0<br>MD OR 0.62              | 0.55-0.70              | ↓                                        | Strong               |

## Appendix S9: Results – Likelihood of receipt of surgery - CONTINUED

| First Author<br>(Year) | Treatment<br>Given Within                               | Number    | Adjusted for                                                       | Outcome of Interest                                               | Odds Ratio<br>/Likelihood                       | 95% CI<br>(p-value)       | Effect of<br>Deprivation on<br>Odds of Surgery | Strength of<br>Evidence |
|------------------------|---------------------------------------------------------|-----------|--------------------------------------------------------------------|-------------------------------------------------------------------|-------------------------------------------------|---------------------------|------------------------------------------------|-------------------------|
| <b>Jones (2008)</b>    | Received during<br>the study period<br>(assumed)        | C: 16,850 | Age   Sex   Stage  <br>Time to Hospital                            | Receipt of surgery [NS]<br>(assumed part of<br>primary treatment) | C: OR 0.99<br>(for a 1 unit<br>increase in IMD) | C: 0.99-1.0               | ↓                                              | Weak                    |
|                        |                                                         | R: 11,406 |                                                                    |                                                                   | R: OR 0.99<br>(for a 1 unit<br>increase in IMD) | R: 0.98-0.99              | ↓                                              |                         |
| <b>Morris (2010)</b>   | 3 years of<br>primary<br>colorectal<br>resection        | 114,155   | Age   Comorbidities  <br>Sex   Site   Stage  <br>Year of Resection | Receipt of Liver<br>Resection                                     | LD OR 1.0<br>MD OR 0.70                         | 0.61-0.80                 | ↓                                              | Strong                  |
| <b>NCIN (2011)</b>     | 30 days before<br>diagnosis to 6<br>months after        | 80,690    | Unadjusted                                                         | Receipt of major<br>resection                                     | (Derived)<br>LD OR 1.0<br>MD OR 0.84            | (Derived)<br>0.80-0.88    | ↓                                              | Weak                    |
| <b>NCRAS (2018)</b>    | C: 30 days<br>before diagnosis<br>to 6 months<br>after  | 75,552    | Unadjusted                                                         | Receipt of major<br>resection                                     | C: (Derived)<br>LD OR 1.0<br>MD OR 0.76         | C: (Derived)<br>0.72-0.80 | ↓                                              | Moderate                |
|                        | R: 30 days<br>before diagnosis<br>to 12 months<br>after | 28,136    |                                                                    |                                                                   | R: (Derived)<br>LD OR 1.0<br>MD OR 0.66         | R: (Derived)<br>0.61-0.72 | ↓                                              |                         |
| <b>Paterson (2014)</b> | Not recorded                                            | 4,915     | Age   Region   Sex  <br>Site   Stage                               | Receipt of surgery [NS]<br>(assumed part of<br>primary treatment) | LD OR 1.23<br>MD OR 1.0                         | 0.96-1.58                 | =                                              | Weak                    |

Appendix S9: Results – Likelihood of receipt of surgery - CONTINUED

| First Author (Year)               | Treatment Given Within                     | Number           | Adjusted for                                                                                    | Outcome of Interest                                                                                             | Odds Ratio /Likelihood     | 95% CI (p-value) | Effect of Deprivation on Odds of Surgery | Strength of Evidence |
|-----------------------------------|--------------------------------------------|------------------|-------------------------------------------------------------------------------------------------|-----------------------------------------------------------------------------------------------------------------|----------------------------|------------------|------------------------------------------|----------------------|
| <b>Pollock and Vickers (1998)</b> | Received during the study period           | 25,304 (assumed) | Age   Sex                                                                                       | Finished consultant episode that included therapeutic or palliative surgery (assumed part of primary treatment) | LD OR 1.0<br>MD OR 0.88    | 0.78-1.00        | =                                        | Weak                 |
| <b>Saito (2019) [1]</b>           | 30 days before diagnosis to 180 days after | C: 38,624        | Age   Comorbidities   Grade   Histology   Presentation   Sex   Site   Stage   Year of Diagnosis | Receipt of major resection<br>[Odds of <i>not</i> receiving major surgery]                                      | C: LD OR 1.0<br>MD OR 0.96 | C: 0.87-1.07     | =                                        | Strong               |
|                                   |                                            | R: 22,630        |                                                                                                 |                                                                                                                 | C: LD OR 1.0<br>MD OR 1.35 | R: 1.22-1.49     | ↓                                        |                      |
| <b>Shack (2009)</b>               | 6 months of diagnosis                      | 29,563           | Age   Comorbidities   Sex   Site   Stage                                                        | Receipt of major resection                                                                                      | LD OR 1.0<br>MD OR 1.63    | 1.17-2.26        | ↑                                        | Strong               |
| <b>Vallance (2018)</b>            | 1 year of CRC diagnosis                    | 13,656           | Age   Comorbidities   Presentation   Sex   Site   Liver Centre   Stage                          | Receipt of Liver Resection                                                                                      | LD OR 1.42<br>MD OR 1.0    | 1.18-1.70        | ↓                                        | Strong               |

Abbreviations: C colon cancer, CI confidence interval, CRC colorectal cancer, LD least deprived, MD most deprived, NS not specified, OR odds ratio, R rectal cancer.

Legend

|                        |                        |                                            |
|------------------------|------------------------|--------------------------------------------|
| ↑ Increased likelihood | ↓ Decreased likelihood | = No significant difference between groups |
|------------------------|------------------------|--------------------------------------------|

### Appendix S10: Results – Likelihood of surgical variation

| First Author<br>(Year)  | Number | Adjusted for                                                                           | Outcome of Interest                                         | Odds Ratio<br>/Likelihood            | 95% CI<br>(p-value)    | Effect of Deprivation on<br>Odds of APER vs AR<br>unless otherwise stated | Strength of<br>Evidence |
|-------------------------|--------|----------------------------------------------------------------------------------------|-------------------------------------------------------------|--------------------------------------|------------------------|---------------------------------------------------------------------------|-------------------------|
| <b>Morris (2008)</b>    | 26,097 | Age   Sex   Year of Diagnosis  <br>Stage   Surgeon Workload  <br>Presentation          | Abdominoperineal Excision<br>vs Anterior Resection          | LD OR 1.0<br>MD OR 1.37              | 1.24-1.50              | ↑                                                                         | Strong                  |
| <b>Nicholson (2012)</b> | 1,574  | Age   Stage   Sex   Surgeon<br>Workload   Presentation   Year of<br>Diagnosis   Others | Abdominoperineal Excision<br>vs Anterior Resection          | LD OR 1.0<br>MD OR 0.62              | 0.36-1.06              | =                                                                         | Weak                    |
| <b>Radwan (2016)</b>    | 120    | Unadjusted                                                                             | Total Pelvic Exenteration vs<br>Partial Pelvic Exenteration | (Derived)<br>LD OR 1.0<br>MD OR 1.75 | (Derived)<br>0.55-5.68 | =<br>[odds of TPE]                                                        | Weak                    |
| <b>Raine (2010)</b>     | 29,214 | Age   Presentation   Sex   Year of<br>Resection                                        | Anterior Resection vs<br>Abdominoperineal Excision          | LD OR 1.34<br>MD OR 1.0              | 1.22-1.47              | ↑                                                                         | Weak                    |
| <b>Smith (2006)</b>     | 2,389  | Unadjusted                                                                             | Anterior Resection vs<br>Abdominoperineal Excision          | (Derived)<br>LD OR 1.0<br>MD OR 1.39 | (Derived)<br>1.04-1.86 | ↑                                                                         | Weak                    |
| <b>Tilney (2008)</b>    | 52,643 | Age   Presentation   Sex   Year of<br>Resection                                        | Abdominoperineal Excision<br>vs Anterior Resection          | LD OR 1.0<br>MD OR 1.59              | 1.45-1.74              | ↑                                                                         | Weak                    |
| <b>Tilney (2009)</b>    | 12,128 | Neoadjuvant Therapy   Sex   Year                                                       | Abdominoperineal Excision<br>vs Anterior Resection          | LD OR 1.0<br>MD OR 1.64              | 1.36-1.97              | ↑                                                                         | Weak                    |

Abbreviations: APER Abdominoperineal Excision, AR Anterior Resection, CI confidence interval, LD least deprived, MD most deprived, OR odds ratio, TPE Total Pelvic Exenteration.

#### Legend

|                        |                        |                                            |
|------------------------|------------------------|--------------------------------------------|
| ↑ Increased likelihood | ↓ Decreased likelihood | = No significant difference between groups |
|------------------------|------------------------|--------------------------------------------|

Appendix S11: Results – Likelihood of receipt of chemotherapy

| First Author (Year) | Treatment Given Within           | Number  | Adjusted for                                                                      | Outcome of Interest                                 | Odds Ratio /Likelihood                                                    | 95% CI (p-value) | Effect of Deprivation on Odds of Chemotherapy | Strength of Evidence |
|---------------------|----------------------------------|---------|-----------------------------------------------------------------------------------|-----------------------------------------------------|---------------------------------------------------------------------------|------------------|-----------------------------------------------|----------------------|
| Bailey (2002)       | Not recorded                     | 119     | Age   Social Resources Rating                                                     | Receipt of adjuvant chemotherapy                    | Excellent/good economic resources OR 1.0<br>Mild/total impairment OR 2.13 | 0.62-7.31        | =                                             | Weak                 |
| Boyle (2020)        | 4 months of surgery              | 11,932  | Access   Age   ASA   Comorbidities   Fitness   Readmission   Sex   Stage   Others | Receipt of adjuvant chemotherapy                    | LD OR 1.36<br>MD OR 1.0                                                   | 1.15-1.60        | ↓                                             | Strong               |
| Campbell (2002)     | 1 year of diagnosis              | 653     | Age   Distance   Presentation   Region   Stage                                    | Receipt of chemotherapy                             | LD OR 1.0<br>MD OR 0.49                                                   | 0.22-1.10        | =                                             | Weak                 |
| Crawford (2012)     | 6 months of diagnosis            | Unknown | Age   Sex   Stage                                                                 | Receipt of chemotherapy in stage IV disease         | C: LD OR 1.0<br>MD OR 0.45                                                | C: 0.27-0.77     | ↓                                             | Weak                 |
|                     |                                  |         |                                                                                   |                                                     | R: LD OR 1.0<br>MD OR 0.73                                                | R: 0.36-1.50     | =                                             |                      |
| Hassan (2023)       | 4 months of surgery              | 8,750   | Age   Ethnicity   No. nodes   Sex   Size   Year of Diagnosis                      | Receipt of combination vs single agent chemotherapy | LD OR 1.0<br>MD OR 0.50                                                   | 0.42-0.59        | ↓                                             | Strong               |
| Hayes (2019)        | 12 months of diagnosis (assumed) | 24,263  | Age   Comorbidities   Sex   Stage   Year of Diagnosis                             | Chemotherapy in surgical patients                   | LD OR 1.0<br>MD OR 0.72                                                   | 0.65-0.80        | ↓                                             | Strong               |
|                     |                                  | 7,647   |                                                                                   | Chemotherapy in non-surgical patients               | LD OR 1.0<br>MD OR 0.44                                                   | 0.36-0.55        | ↓                                             |                      |

## Appendix S11: Results – Likelihood of receipt of chemotherapy - CONTINUED

| First Author<br>(Year) | Treatment<br>Given Within                         | Number    | Adjusted for                                                                                | Outcome of Interest                                       | Odds Ratio<br>/Likelihood                       | 95% CI<br>(p-value)    | Effect of<br>Deprivation on<br>Odds of<br>Chemotherapy | Strength<br>of<br>Evidence |
|------------------------|---------------------------------------------------|-----------|---------------------------------------------------------------------------------------------|-----------------------------------------------------------|-------------------------------------------------|------------------------|--------------------------------------------------------|----------------------------|
| <b>Hole (2002)</b>     | Received during<br>the study period<br>(assumed)  | 2,269     | Unadjusted                                                                                  | Receipt of adjuvant<br>therapy (presumed<br>chemotherapy) | (Derived)<br>LD OR 1.0<br>MD OR 0.31            | (Derived)<br>0.09-0.91 | ↓                                                      | Weak                       |
| <b>Jones (2008)</b>    | Received during<br>the study period<br>(assumed)  | C: 16,850 | Age   Sex   Stage  <br>Time to Hospital                                                     | Receipt of<br>chemotherapy                                | C: OR 0.99<br>(for a 1 unit increase in<br>IMD) | C: 0.98-0.99           | ↓                                                      | Weak                       |
|                        |                                                   | R: 11,406 |                                                                                             |                                                           | R: OR 0.99<br>(for a 1 unit increase in<br>IMD) | R: 0.99-1.0            | ↓                                                      |                            |
| <b>McLeod (1999)</b>   | 6 months from<br>the first<br>admission           | 7,852     | Age   Comorbidities  <br>Death   Marital Status  <br>Presentation   Rural  <br>Sex   Others | Receipt of<br>chemotherapy                                | LD OR 1.0<br>MD OR 0.73                         | 0.55-0.96              | ↓                                                      | Weak                       |
| <b>NCRAS (2018)</b>    | 31 days before<br>diagnosis to 12<br>months after | C: 75,552 | Unadjusted                                                                                  | Receipt of<br>chemotherapy                                | C: (Derived)<br>LD OR 1.0<br>MD OR 0.85         | 0.81-0.89              | ↓                                                      | Moderate                   |
|                        |                                                   | R: 28,136 |                                                                                             |                                                           | R: (Derived)<br>LD OR 1.0<br>MD OR 1.03         | 0.95-1.11              | =                                                      |                            |
| <b>Paterson (2014)</b> | Not recorded                                      | 4,915     | Age   Metastatic<br>Disease   Region   Sex<br>  Site                                        | Receipt of<br>chemotherapy                                | LD OR 1.46<br>MD OR 1.0                         | 1.16-1.83              | ↓                                                      | Weak                       |

Appendix S11: Results – Likelihood of receipt of chemotherapy - CONTINUED

| First Author (Year) | Treatment Given Within            | Number | Adjusted for                                                             | Outcome of Interest              | Odds Ratio /Likelihood  | 95% CI (p-value) | Effect of Deprivation on Odds of Chemotherapy | Strength of Evidence |
|---------------------|-----------------------------------|--------|--------------------------------------------------------------------------|----------------------------------|-------------------------|------------------|-----------------------------------------------|----------------------|
| Pitchforth (2002)   | 6 months from the first admission | 7,303  | Age   Comorbidities   Death   Presentation   Rural   Sex   Cancer Centre | Receipt of chemotherapy          | LD OR 1.0<br>MD OR 0.55 | 0.20-0.90        | ↓                                             | Weak                 |
| Shack (2009)        | 6 months of diagnosis             | 29,563 | Age   Comorbidities   Sex   Site   Stage                                 | Receipt of chemotherapy          | LD OR 1.0<br>MD OR 0.84 | 0.74-0.94        | ↓                                             | Strong               |
| Taylor (2021)       | 6 months of surgery               | 23,402 | Age   Comorbidities   Sex   Stage                                        | Receipt of adjuvant chemotherapy | LD OR 1.0<br>MD OR 0.75 | 0.67-0.85        | ↓                                             | Strong               |

Abbreviations: ASA American Society of Anaesthesiologists grade, CI confidence interval, C colon, LD least deprived, MD most deprived, OR odds ratio, R rectum.

Legend

|                        |                        |                                            |
|------------------------|------------------------|--------------------------------------------|
| ↑ Increased likelihood | ↓ Decreased likelihood | = No significant difference between groups |
|------------------------|------------------------|--------------------------------------------|

## Appendix S12: Results – Likelihood of receipt of radiotherapy

| First Author<br>(Year) | Treatment<br>Given Within                         | Number | Adjusted for                            | Outcome of Interest                                  | Odds Ratio<br>/Likelihood                    | 95% CI<br>(p-value)    | Effect of<br>Deprivation on<br>Odds of<br>Radiotherapy | Strength<br>of<br>Evidence |
|------------------------|---------------------------------------------------|--------|-----------------------------------------|------------------------------------------------------|----------------------------------------------|------------------------|--------------------------------------------------------|----------------------------|
| <b>Campbell (2002)</b> | 1 year of<br>diagnosis                            | 653    | Age   Distance   Site  <br>Stage        | Receipt of<br>radiotherapy                           | LD OR 1.0<br>MD OR 0.85                      | 0.38-1.91              | =                                                      | Weak                       |
| <b>Jones (2008)</b>    | Received during<br>the study period<br>(assumed)  | 11,406 | Age   Sex   Stage  <br>Time to Hospital | Receipt of<br>radiotherapy (rectal<br>cancer cohort) | OR 0.99<br>(for a 1 unit increase in<br>IMD) | 0.99-1.0               | =                                                      | Weak                       |
| <b>Morris (2016)</b>   | 1 year of surgery                                 | 9,201  | Unadjusted                              | Receipt of<br>radiotherapy                           | (Derived)<br>LD OR 1.0<br>MD OR 1.39         | (Derived)<br>1.21-1.60 | ↑                                                      | Weak                       |
| <b>NCRAS (2018)</b>    | 31 days before<br>diagnosis to 12<br>months after | 28,136 | Unadjusted                              | Receipt of<br>radiotherapy                           | (Derived)<br>LD OR 1.0<br>MD OR 1.33         | (Derived)<br>1.23-1.44 | ↑                                                      | Moderate                   |
| <b>Paterson (2014)</b> | Not recorded                                      | 1,345  | Unadjusted                              | Receipt of<br>neoadjuvant<br>radiotherapy            | (Derived)<br>LD OR 1.0<br>MD OR 1.15         | (Derived)<br>0.79-1.67 | =                                                      | Weak                       |
| <b>Radwan (2016)</b>   | Received during<br>the study period<br>(assumed)  | 120    | Unadjusted                              | Receipt of<br>neoadjuvant<br>chemoradiotherapy       | (Derived)<br>LD OR 1.0<br>MD OR 1.0          | N/A                    | =                                                      | Weak                       |
| <b>Shack (2009)</b>    | 6 months of<br>diagnosis                          | 29,563 | Age   Comorbidities  <br>Sex   Stage    | Receipt of<br>radiotherapy                           | LD OR 1.0<br>MD OR 0.90                      | 0.77-1.04              | =                                                      | Strong                     |

Abbreviations: CI confidence interval, LD least deprived, MD most deprived, OR odds ratio.



1  
2  
3  
4  
5  
6  
7  
8  
9  
10  
11  
12  
13  
14  
15  
16  
17  
18  
19  
20  
21  
22  
23  
24  
25  
26  
27  
28  
29  
30  
31  
32  
33  
34  
35  
36  
37  
38  
39  
40  
41  
42  
43  
44  
45  
46

Legend

|                        |                        |                                            |
|------------------------|------------------------|--------------------------------------------|
| ↑ Increased likelihood | ↓ Decreased likelihood | = No significant difference between groups |
|------------------------|------------------------|--------------------------------------------|

For peer review only

### Appendix S13: Results – Likelihood of receipt of any treatment

| First Author<br>(Year) | Treatment Given Within             | Number    | Adjusted for      | Outcome of Interest                                                                 | Odds Ratio<br>/Likelihood  | 95% CI<br>(p-value) | Effect of<br>Deprivation on<br>Odds of Any<br>Treatment | Strength<br>of<br>Evidence |
|------------------------|------------------------------------|-----------|-------------------|-------------------------------------------------------------------------------------|----------------------------|---------------------|---------------------------------------------------------|----------------------------|
| <b>Crawford (2012)</b> | 6 months of diagnosis              | C: 11,163 | Age   Sex   Stage | Receipt of any treatment<br>(chemotherapy,<br>radiotherapy, surgery NS)             | C: LD OR 1.0<br>MD OR 0.54 | C: 0.39-0.76        | ↓                                                       | Weak                       |
|                        |                                    | R: 7,058  |                   |                                                                                     | R: LD OR 1.0<br>MD OR 0.54 | R: 0.34-0.84        | ↓                                                       |                            |
| <b>Lejeune (2010)</b>  | 6 months of first contact with NHS | 71,917    | Age   Stage       | Receipt of any treatment<br>(presumed surgery,<br>chemotherapy,<br>radiotherapy NS) | LD OR 1.0<br>MD OR 0.87    | 0.82-0.92           | ↓                                                       | Moderate                   |

Abbreviations: C colon, CI confidence interval, LD least deprived, MD most deprived, NHS National Health Service, NS not specified, OR odds ratio, R rectal.

#### Legend

|                        |                        |                                            |
|------------------------|------------------------|--------------------------------------------|
| ↑ Increased likelihood | ↓ Decreased likelihood | = No significant difference between groups |
|------------------------|------------------------|--------------------------------------------|

## References

- 1 Page, M. *et al.* The PRISMA 2020 statement: An updated guideline for reporting systematic reviews. In: (2020).
- 2 Bailey, C. *et al.* Treatment decisions in older patients with colorectal cancer: the role of age and multidimensional function. *European Journal of Cancer Care* **12**, 257-262 (2003).
- 3 Hayes, L. *et al.* Age-related inequalities in colon cancer treatment persist over time: a population-based analysis. *Journal of Epidemiology and Community Health* **73**, 34 (2019).
- 4 Hayes, L. *et al.* Age-related and socioeconomic inequalities in timeliness of referral and start of treatment in colorectal cancer: a population-based analysis. *Journal of Epidemiology and Community Health* **75**, 1 (2021).
- 5 Shack, L. *What factors influence socioeconomic inequalities in colorectal cancer survival? PhD Thesis.* PhD Thesis thesis, London School of Hygiene and Tropical Medicine, (2009).
- 6 Saito, M. K., Quaresma, M., Fowler, H., Majano, S. B. & Rachet, B. Exploring socioeconomic differences in surgery and in time to elective surgery for colon cancer in England: Population-based study. *Cancer Epidemiology* **71**, 101896 (2021).
- 7 Pollock, A. M. & Vickers, N. Deprivation and emergency admissions for cancers of colorectum, lung, and breast in south east England: ecological study. *BMJ* **317**, 245 (1998).
- 8 Jones, A. P. *et al.* Travel time to hospital and treatment for breast, colon, rectum, lung, ovary and prostate cancer. *European Journal of Cancer* **44**, 992-999 (2008).
- 9 Lejeune, C. *et al.* Socio-economic disparities in access to treatment and their impact on colorectal cancer survival. *International Journal of Epidemiology* **39**, 710-717 (2010).
- 10 Di Girolamo, C. *et al.* Can we assess Cancer Waiting Time targets with cancer survival? A population-based study of individually linked data from the National Cancer Waiting Times monitoring dataset in England, 2009-2013. *PLOS ONE* **13**, e0201288 (2018).
- 11 Price, S., Zhang, X. & Spencer, A. Measuring the impact of national guidelines: What methods can be used to uncover time-varying effects for healthcare evaluations? *Social Science & Medicine* **258**, 113021 (2020).
- 12 Neal, R. D. & Allgar, V. L. Sociodemographic factors and delays in the diagnosis of six cancers: analysis of data from the 'National Survey of NHS Patients: Cancer'. *British Journal of Cancer* **92**, 1971-1975 (2005).
- 13 Pearson, C. *et al.* Establishing population-based surveillance of diagnostic timeliness using linked cancer registry and administrative data for patients with colorectal and lung cancer. *Cancer Epidemiology* **61**, 111-118 (2019).
- 14 Morris, E. *et al.* Unacceptable variation in abdominoperineal excision rates for rectal cancer: time to intervene? *Gut* **57**, 1690 (2008).
- 15 Morris, E. J. *et al.* Surgical management and outcomes of colorectal cancer liver metastases. *British Journal of Surgery* **97**, 1110-1118 (2010).
- 16 Morris, E. J. A. *et al.* Wide Variation in the Use of Radiotherapy in the Management of Surgically Treated Rectal Cancer Across the English National Health Service. *Clinical Oncology* **28**, 522-531 (2016).

- 1  
2  
3  
4 17 Boyle, J. M. *et al.* Determinants of Variation in the Use of Adjuvant Chemotherapy for Stage III Colon Cancer in England. *Clinical Oncology* **32**, e135-e144 (2020).
- 5  
6 18 Crawford, S. M., Sauerzapf, V., Haynes, R., Forman, D. & Jones, A. P. Social and geographical factors affecting access to treatment of colorectal cancer: a cancer registry study. *BMJ Open* **2**, e000410 (2012).
- 7  
8  
9 19 Vallance, A. E. *et al.* Socioeconomic differences in selection for liver resection in metastatic colorectal cancer and the impact on survival. *European Journal of Surgical Oncology* **44**, 1588-1594 (2018).
- 10  
11  
12  
13 20 Fenton, H. M. *et al.* Variation in the Use of Resection for Colorectal Cancer Liver Metastases. *Ann Surg* **270**, 892-898 (2019).
- 14  
15  
16 21 Fenton, H. M. *et al.* National variation in pulmonary metastasectomy for colorectal cancer. *Colorectal Disease* **23**, 1306-1316 (2021).
- 17  
18 22 Taylor, J. C. *et al.* Addressing the variation in adjuvant chemotherapy treatment for colorectal cancer: Can a regional intervention promote national change? *International Journal of Cancer* **148**, 845-856 (2021).
- 19  
20  
21  
22 23 Bharathan, B. *et al.* Impact of deprivation on short- and long-term outcomes after colorectal cancer surgery. *British Journal of Surgery* **98**, 854-865 (2011).
- 23  
24 24 Harris, A. R. *et al.* Socioeconomic deprivation adversely affects survival of patients with rectal cancer. (2009).
- 25  
26  
27 25 Raine, R. *et al.* Social variations in access to hospital care for patients with colorectal, breast, and lung cancer between 1999 and 2006: retrospective analysis of hospital episode statistics. *BMJ* **340**, b5479 (2010).
- 28  
29  
30 26 Redaniel, M., Martin, R., Blazeby, J., Wade, J. & Jeffreys, M. The association of time between diagnosis and major resection with poorer colorectal cancer survival: a retrospective cohort study. *BMC Cancer* **14** (2014).
- 31  
32  
33  
34 27 Smith, J. J. *et al.* Social deprivation and outcomes in colorectal cancer. *British Journal of Surgery* **93**, 1123-1131 (2006).
- 35  
36  
37 28 Tilney, H. S. *et al.* A National Perspective on the Decline of Abdominoperineal Resection for Rectal Cancer. *Annals of Surgery* **247** (2008).
- 38  
39 29 Tilney, H. *et al.* The National Bowel Cancer Project: Social Deprivation Is an Independent Predictor of Nonrestorative Rectal Cancer Surgery. *Diseases of the Colon & Rectum* **52** (2009).
- 40  
41  
42 30 Hassan, S., Miles, A., Rachet, B. & Morris, M. Variations in the Type of Adjuvant Chemotherapy Among Stage III Colon Cancer Patients in England. *Journal of Gastrointestinal Cancer* (2023).
- 43  
44  
45  
46 31 Saito, M. K. *Socioeconomic inequalities in colorectal cancer survival in England and Japan* PhD thesis, London School of Hygiene & Tropical Medicine, (2019).
- 47  
48 32 Benitez Majano, S. *et al.* Mental Health Morbidities and Time to Cancer Diagnosis Among Adults With Colon Cancer in England. *JAMA Network Open* **5**, e2238569-e2238569 (2022).
- 49  
50  
51  
52 33 Majano, S. B., Lyratzopoulos, G., Rachet, B., de Wit, N. J. & Renzi, C. Do presenting symptoms, use of pre-diagnostic endoscopy and risk of emergency cancer diagnosis vary by comorbidity burden and type in patients with colorectal cancer? *British Journal of Cancer* **126**, 652-663 (2022).
- 53  
54  
55  
56 34 Campbell, N. C. *et al.* Impact of deprivation and rural residence on treatment of colorectal and lung cancer. *British Journal of Cancer* **87**, 585-590 (2002).
- 57  
58  
59  
60

- 1  
2  
3 35 Hole, D. & McArdle, C. Impact of socioeconomic deprivation on outcome after  
4 surgery for colorectal cancer. *Br J Surgery* **89**, 586-590 (2002).  
5  
6 36 McLeod, A. Variation in the provision of chemotherapy for colorectal cancer. *Journal*  
7 *of Epidemiology and Community Health* **53**, 775 (1999).  
8  
9 37 Paterson, H. M., Mander, B. J., Muir, P., Phillips, H. A. & Wild, S. H. Deprivation and  
10 access to treatment for colorectal cancer in southeast Scotland 2003–2009.  
11 *Colorectal Disease* **16**, O51-O57 (2014).  
12  
13 38 Nicholson, G. A. *et al.* Quality of care in rectal cancer surgery. Exploring influencing  
14 factors in the West of Scotland. *Colorectal Disease* **14**, 731-739 (2012).  
15  
16 39 Pitchforth, E., Russell, E. & Van der Pol, M. Access to specialist cancer care: is it  
17 equitable? *British Journal of Cancer* **87**, 1221-1226 (2002).  
18  
19 40 Radwan, R. *et al.* Social deprivation in patients requiring pelvic exenterative surgery.  
20 *Colorectal Disease* **18**, 684-687 (2016).  
21  
22 41 Haddaway, N., Grainger, M. & Gray, C. *citation chaser: An R package and Shiny app*  
23 *for forward and backward citations chasing in academic searching.*,  
24 <https://estech.shinyapps.io/citationchaser/> (2021).  
25  
26 42 EndNote v. EndNote X9 (Clarivate, Philadelphia, PA, 2013).  
27  
28 43 Afshar, N., English, D. & Milne, R. Explaining Socio-Economic Inequalities in Cancer  
29 Survival: A Systematic Review. *Cancer Control* **28** (2021).  
30  
31 44 Woods, L. M., Rachet, B. & Coleman, M. P. Origins of socio-economic inequalities in  
32 cancer survival: a review. *Annals of Oncology* **17**, 5-19 (2006).  
33  
34 45 Ayiku, L. *et al.* The medline UK filter: development and validation of a geographic  
35 search filter to retrieve research about the UK from OVID medline. *Health*  
36 *Information & Libraries Journal* **34**, 200-216 (2017).  
37  
38 46 Ayiku, L. *et al.* The Embase UK filter: validation of a geographic search filter to  
39 retrieve research about the UK from OVID Embase. *Health Information & Libraries*  
40 *Journal* **36**, 121-133 (2019).  
41  
42 47 McGowan, J. *et al.* PRESS Peer Review of Electronic Search Strategies: 2015  
43 Guideline Statement. *Journal of Clinical Epidemiology* **75**, 40-46 (2016).  
44  
45 48 Forrest, L. F., Adams, J., Wareham, H., Rubin, G. & White, M. Socioeconomic  
46 Inequalities in Lung Cancer Treatment: Systematic Review and Meta-Analysis. *PLOS*  
47 *Medicine* **10**, e1001376 (2013).  
48  
49 49 Forrest, L. F., Sowden, S., Rubin, G., White, M. & Adams, J. Socio-economic  
50 inequalities in stage at diagnosis, and in time intervals on the lung cancer pathway  
51 from first symptom to treatment: systematic review and meta-analysis. *Thorax* **72**,  
52 430 (2017).  
53  
54 50 Prady, S. L., Uphoff, E. P., Power, M. & Golder, S. Development and validation of a  
55 search filter to identify equity-focused studies: reducing the number needed to  
56 screen. *BMC medical research methodology* **18**, 106-106 (2018).  
57  
58 51 Public Health England Knowledge and Library Services. *Finding the Evidence: Health*  
59 *inequalities, equality and diversity*,  
60 <https://cash.libraryservices.nhs.uk/search/?q=finding+the+evidence> Accessed March  
2023, (2016).  
52  
53 52 Hosking, J., Macmillan, A., Jones, R., Ameratunga, S. & Woodward, A. Searching for  
54 health equity: validation of a search filter for ethnic and socioeconomic inequalities  
55 in transport. *Systematic reviews* **8**, 94-94 (2019).

- 1  
2  
3  
4 53 Grossetta Nardini, H. & Wang, L. *The Yale MeSH Analyzer* <http://mesh.med.yale.edu/>  
5 Accessed August 2022, (2022).  
6  
7 54 Phillips, A. *et al.* Socioeconomic differences impact overall survival in advanced  
8 ovarian cancer (AOC) prior to achievement of standard therapy. *Archives of*  
9 *Gynecology and Obstetrics* **300**, 1261-1270 (2019).  
10  
11 55 Vallance, A. E. *et al.* Role of Emergency Laparoscopic Colectomy for Colorectal  
12 Cancer: A Population-based Study in England. *Ann Surg.* **270**, 172-179 (2019).  
13  
14 56 Byrne, B. E., Vincent, C. A. & Faiz, O. D. Inequalities in Implementation and Different  
15 Outcomes During the Growth of Laparoscopic Colorectal Cancer Surgery in England:  
16 A National Population-Based Study from 2002 to 2012. *World Journal of Surgery* **42**,  
17 3422-3431 (2018).  
18  
19 57 Walter, F. M. *et al.* Symptoms and patient factors associated with longer time to  
20 diagnosis for colorectal cancer: results from a prospective cohort study. *British*  
21 *journal of cancer* **115**, 533-541 (2016).  
22  
23 58 Wiggins, M. G., Shahtahmasebi, G., Aroori, S., Bowles, M. J. & Stell, D. A.  
24 Socioeconomic status influences the likelihood but not the outcome of liver  
25 resection for colorectal liver metastasis. *HPB* **17**, 150-158 (2015).  
26  
27 59 Warwick, J. *et al.* Variation in colorectal cancer treatment and survival: a cohort  
28 study covering the East Anglia region. *Colorectal Disease* **15**, 1243-1252 (2013).  
29  
30 60 Oliphant, R. *et al.* Deprivation and Colorectal Cancer Surgery: Longer-Term Survival  
31 Inequalities are Due to Differential Postoperative Mortality Between Socioeconomic  
32 Groups. *Annals of Surgical Oncology* **20**, 2132-2139 (2013).  
33  
34 61 Askari, A. *et al.* The relationship between ethnicity, social deprivation and late  
35 presentation of colorectal cancer. In: Vol. 47 88-93 (Cancer Epidemiology, 2017).  
36  
37 62 Taylor, E. F. *et al.* Population-based study of laparoscopic colorectal cancer surgery  
38 2006-2008. *The British journal of surgery* **100**, 553-560 (2013).  
39  
40 63 Bramer, W. M., Giustini, D., de Jonge, G. B., Holland, L. & Bekhuis, T. De-duplication  
41 of database search results for systematic reviews in EndNote. *Journal of the Medical*  
42 *Library Association : JMLA* **104**, 240-243 (2016).  
43  
44 64 Veritas Health Innovation Melbourne Australia. *Covidence systematic review*  
45 *software*, [www.covidence.org](http://www.covidence.org). (2021).  
46  
47 65 Review Manager (RevMan) [Computer Program]. Version 5.4. (2020).  
48  
49  
50  
51  
52  
53  
54  
55  
56  
57  
58  
59  
60

# BMJ Open

## Where are the inequalities in colorectal cancer care in a country with universal healthcare? A systematic review and narrative synthesis

|                                 |                                                                                                                                                                                                                                                                                                                                                                                                                      |
|---------------------------------|----------------------------------------------------------------------------------------------------------------------------------------------------------------------------------------------------------------------------------------------------------------------------------------------------------------------------------------------------------------------------------------------------------------------|
| Journal:                        | <i>BMJ Open</i>                                                                                                                                                                                                                                                                                                                                                                                                      |
| Manuscript ID                   | bmjopen-2023-080467.R1                                                                                                                                                                                                                                                                                                                                                                                               |
| Article Type:                   | Original research                                                                                                                                                                                                                                                                                                                                                                                                    |
| Date Submitted by the Author:   | 21-Nov-2023                                                                                                                                                                                                                                                                                                                                                                                                          |
| Complete List of Authors:       | Pickwell-Smith, Benjamin ; University of Hull; Hull and East Yorkshire Hospitals NHS Trust<br>Spencer, Katie; Leeds Institute of Health Sciences University of Leeds; Leeds Teaching Hospitals NHS Trust<br>Sadeghi, Mahboobeh Haji; University of Hull<br>Greenley, Sarah; University of Hull<br>Lind, Michael; University of Hull; Hull and East Yorkshire Hospitals NHS Trust<br>Macleod, Una; University of Hull |
| <b>Primary Subject Heading</b>: | Oncology                                                                                                                                                                                                                                                                                                                                                                                                             |
| Secondary Subject Heading:      | Public health, Health services research, Health policy, Epidemiology                                                                                                                                                                                                                                                                                                                                                 |
| Keywords:                       | SOCIAL MEDICINE, Health policy < HEALTH SERVICES ADMINISTRATION & MANAGEMENT, Adult oncology < ONCOLOGY, Epidemiology < ONCOLOGY, PUBLIC HEALTH, Systematic Review                                                                                                                                                                                                                                                   |
|                                 |                                                                                                                                                                                                                                                                                                                                                                                                                      |

SCHOLARONE™  
Manuscripts

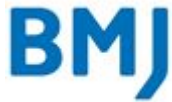

I, the Submitting Author has the right to grant and does grant on behalf of all authors of the Work (as defined in the below author licence), an exclusive licence and/or a non-exclusive licence for contributions from authors who are: i) UK Crown employees; ii) where BMJ has agreed a CC-BY licence shall apply, and/or iii) in accordance with the terms applicable for US Federal Government officers or employees acting as part of their official duties; on a worldwide, perpetual, irrevocable, royalty-free basis to BMJ Publishing Group Ltd ("BMJ") its licensees and where the relevant Journal is co-owned by BMJ to the co-owners of the Journal, to publish the Work in this journal and any other BMJ products and to exploit all rights, as set out in our [licence](#).

The Submitting Author accepts and understands that any supply made under these terms is made by BMJ to the Submitting Author unless you are acting as an employee on behalf of your employer or a postgraduate student of an affiliated institution which is paying any applicable article publishing charge ("APC") for Open Access articles. Where the Submitting Author wishes to make the Work available on an Open Access basis (and intends to pay the relevant APC), the terms of reuse of such Open Access shall be governed by a Creative Commons licence – details of these licences and which [Creative Commons](#) licence will apply to this Work are set out in our licence referred to above.

Other than as permitted in any relevant BMJ Author's Self Archiving Policies, I confirm this Work has not been accepted for publication elsewhere, is not being considered for publication elsewhere and does not duplicate material already published. I confirm all authors consent to publication of this Work and authorise the granting of this licence.



1  
2  
3 **1 Where are the inequalities in colorectal cancer care in**  
4  
5  
6 **2 a country with universal healthcare? A systematic**  
7  
8  
9  
10 **3 review and narrative synthesis**  
11  
12

13 **4 Authors**  
14

15  
16 Benjamin Pickwell-Smith<sup>1,4\*</sup>, Katie Spencer<sup>2,3</sup>, Mahboobeh Haji Sadeghi<sup>1</sup>, Sarah  
17  
18 Greenley<sup>1</sup>, Michael Lind<sup>1,4</sup> and Una Macleod<sup>1</sup>  
19  
20

21  
22 <sup>1</sup>Hull York Medical School, University of Hull, Hull, United Kingdom  
23

24  
25 <sup>2</sup>Academic Unit of Health Economics, Leeds Institute of Health Sciences, University of  
26  
27 Leeds, Leeds, United Kingdom  
28  
29

30  
31 <sup>3</sup>Leeds Cancer Centre, Leeds Teaching Hospitals NHS Trust, Leeds, United Kingdom  
32

33  
34 <sup>4</sup>Castle Hill Hospital, Hull and East Yorkshire Hospitals NHS Trust, Hull, United  
35  
36 Kingdom  
37

38 **13 Contact**  
39  
40

41  
42 \*Correspondence:  
43

44  
45 [Benjamin.Pickwell-Smith@hyms.ac.uk](mailto:Benjamin.Pickwell-Smith@hyms.ac.uk)  
46

47  
48 [07792891399](tel:07792891399)  
49

50  
51 **17 Corresponding Author ORCID Identifier**  
52

53  
54 0009-0003-1941-6444  
55  
56

57  
58  
59  
60  
19

## 1 **Abstract**

### 2 **Objective**

3 Patients diagnosed with colorectal cancer living in more deprived areas experience  
4 worse survival than those in more affluent areas. Those living in more deprived areas  
5 face barriers to accessing timely, quality healthcare. These barriers may contribute to  
6 socioeconomic inequalities in survival. We evaluated the literature for any association  
7 between socioeconomic group, hospital delay, and treatments received among patients  
8 with colorectal cancer in the United Kingdom, a country with universal healthcare.

### 9 **Design**

10 MEDLINE, EMBASE, CINAHL, CENTRAL, SCIE, AMED and PsycINFO were  
11 searched from inception to January 2023. Grey literature, including HMIC, BASE, and  
12 Google Advanced Search, and forward and backward citation searches were conducted.  
13 Two reviewers independently reviewed titles, abstracts, and full-text articles.  
14 Observational UK-based studies were included if they reported socioeconomic  
15 measures and an association with either hospital delay or treatments received. The  
16 QUIPS tool assessed bias risk, and a narrative synthesis was conducted. The review is  
17 reported to PRISMA 2020 and registered with PROSPERO [CRD42022347652].

### 18 **Results**

19 Forty-one of the 7,209 identified references were included. Twelve studies evaluated  
20 seven different hospital intervals. There was a significant association between area-level  
21 deprivation and a longer time from first presentation in primary care to diagnosis.  
22 Thirty-two studies evaluated treatments received. There were socioeconomic  
23 inequalities in surgery and chemotherapy but not radiotherapy.

### 24 **Conclusion**

1 Patients with colorectal cancer face inequalities across the cancer care continuum.  
2 Further research is needed to understand why and what evidence-based actions can  
3 reduce these inequalities in treatment. Qualitative research of patients and clinicians  
4 conducted across various settings would provide a rich understanding of the complex  
5 factors that drive these inequalities. Further research should also consider using a causal  
6 approach to future studies to considerably strengthen the interpretation. Clinicians can  
7 try and mitigate some potential causes of colorectal cancer inequalities, including  
8 signposting to financial advice and patient transport schemes.

### 9 **Trial registration**

10 PROSPERO [CRD42022347652].

### 11 **Strengths and limitations**

- 12 • The searches were extensive – conducted across eight databases, supplemented  
13 with citation searching and hand-searching websites.
- 14 • The search strategy was validated.
- 15 • The inclusion of non-peer-reviewed literature was a key strength.
- 16 • Due to heterogeneous methods, meta-analysis was not possible.

### 17 **Funding**

18 This work was funded in whole by Yorkshire Cancer Research (award reference number  
19 HEND405). Yorkshire Cancer Research has not been involved in any other aspect of the  
20 project, such as the design, data collection, analysis, or interpretation.

### 21 **Competing interests**

22 The authors declare no conflict of interest.

## 1 **Introduction**

2 Colorectal cancer is the second most common cause of cancer-related death in the  
3 United Kingdom (UK).(1) Survival has improved since the 1990s but lags behind  
4 comparable countries.(2) There are also survival gradients within countries, including  
5 those with universal healthcare, such as the UK and Australia.(3) In particular, patients  
6 living in more deprived areas experience significantly worse survival outcomes.(1, 3)  
7 Healthcare systems can contribute to these inequalities, as treatment differences likely  
8 compound differential outcomes across populations.(2)

9 Timely diagnosis and treatment are also essential, with delays associated with worse  
10 outcomes. The Aarhus statement suggested a framework for measuring these delays,  
11 categorising the patient journey into patient, doctor and system intervals.(4)

12 Specifically, the system interval was defined as the period from primary care-initiated  
13 investigations or referral to the commencement of treatment.(4) Socioeconomic  
14 circumstances can impact this interval and yet is comparatively under-researched.

15 Existing inequalities have been exacerbated by the COVID-19 pandemic, with  
16 vulnerable patient groups disproportionately affected by suboptimal care.(5) The  
17 evolution of precision medicine and the development of new technologies and surgical  
18 approaches will likely worsen existing inequalities, a process described as the “inverse  
19 equity law”.(6) Worryingly, disparities in access to precision oncology are already well  
20 documented.(7) Understanding where inequalities are in the pathways of care for  
21 patients with colorectal cancer is essential to inform policy and identify areas of further  
22 research to target evidence-based action.

23 We evaluated the literature for any association between socioeconomic group, system  
24 interval, and treatment amongst patients with colorectal cancer in the UK. By focusing  
25 exclusively on studies conducted within a single country with a universal healthcare

1 system, our systematic review homogenised the healthcare infrastructure, policy, and  
2 patient population, ensuring a more interpretable analysis of disparities in cancer care  
3 with greater scope for policy impact.

#### 4 **Methods**

5 This systematic review was registered with PROSPERO (CRD42022347652). The  
6 review is reported according to the PRISMA 2020 statement (Appendix S1).(8)

##### 7 *Patient and public involvement*

8 This study was discussed with Involve Hull, a patient and public involvement group  
9 affiliated with the author's institution. The review was considered necessary by all  
10 members of the group.

##### 11 *Eligibility criteria*

12 Published and grey-literature observational studies were considered for inclusion if  
13 relevant outcomes of patients with a primary diagnosis of colorectal cancer (ICD10  
14 C18-C20) in the UK were reported.

15 Outcomes were only included if they had been analysed by a measure of socioeconomic  
16 status [e.g., an area-based measure such as the Index of Multiple Deprivation (IMD) or  
17 individual measures such as occupation]. The relevant outcomes were defined as  
18 follows:

- 19 • The association between socioeconomic status and the length of the system interval,  
20 as defined by the Aarhus statement.(4) Any part of the system interval could have  
21 been measured.
- 22 • Or receipt of cancer-directed treatment. Studies evaluating palliative or supportive  
23 care only were excluded.

##### 24 *Information sources*

1 The following bibliographic databases were searched from inception to 26/01/2023:  
2 MEDLINE, EMBASE, AMED and PsycINFO, CINAHL, CENTRAL and Science  
3 Citation Index Expanded.

4 The grey literature was searched using HMIC, BASE, NICE Evidence Search and  
5 Google Advanced Search on 26/01/2023. In addition, twelve websites were  
6 systematically hand-searched, and backwards and forward citation searches were  
7 conducted on 30/03/2023 (details in Appendix S2).

### 8 *Search strategy*

9 The search strategies are listed in Appendix S3. The search strategy was developed and  
10 validated in conjunction with SG, an information specialist (details in Appendix S4).  
11 BPS and another reviewer (MS or KS) independently screened all titles and abstracts  
12 against the pre-determined eligibility criteria. The full texts of eligible titles and  
13 abstracts were obtained and independently screened for inclusion. Conflicts were  
14 resolved by consensus.

### 15 *Data Collection Process*

16 One researcher (BPS) extracted information from the included studies, collating the  
17 relevant data onto a data extraction form. A second author (KS) checked the extracted  
18 data, and discrepancies were reconciled by consensus. The data items and effect  
19 measures that were sought for extraction are detailed in Appendix S5.

### 20 *Study risk of bias assessment*

21 Two researchers (BPS and KS) independently evaluated the study risk of bias against  
22 domains adapted from the Quality in Prognosis Studies tool (QUIPS).(9) Each domain  
23 was judged to have a high, moderate, or low risk of bias, with the evaluations collated  
24 onto a pre-prepared form (Appendix S6).

1 Risk of bias assessments informed the narrative synthesis, with greater weight given to  
2 studies with a lower risk of bias. A study's evidence was considered "strong" if there  
3 were no high risk of bias categories, "moderate" if there was a high risk of bias in one  
4 category, and "weak" if there were two or more categories at high risk of bias.

5 However, studies were not excluded based on this.

### 6 *Synthesis methods*

7 A narrative synthesis was conducted, according to the synthesis without meta-analysis  
8 in systematic reviews reporting guideline.(10) An overall assessment of the association  
9 between socioeconomic status and each outcome was made, considering the consistency  
10 and strength of supporting evidence from each study. Coefficients were extracted based  
11 on multivariable models. Given the inherent methodological heterogeneity, diverse  
12 patient populations, varying measures of deprivation, and significant statistical  
13 heterogeneity observed across the included studies, a meta-analysis was deemed  
14 inappropriate as it could yield misleading or oversimplified results. While a meta-  
15 analysis was not conducted, forest plots were generated to visually illustrate the  
16 observed outcomes in individual studies.

## 17 **Results**

### 18 *Study Selection*

19 The database searches yielded 7,201 studies, 214 of which were retrieved for full-text  
20 screening. An additional six studies were identified from the grey literature. Overall,  
21 forty-one studies were included (Figure 1).(11)

### 22 *Study Characteristics*

23 The characteristics of the included studies are summarised in Appendix S7. The system  
24 interval was examined in twelve studies, with seven different time points evaluated,  
25 summarised in Figure 2.(12-23) Fifteen studies reported the receipt of surgery,(19, 20,

1 24-36) seven studies evaluated surgical variation,(37-43) fourteen studies reported the  
2 receipt of chemotherapy,(19, 20, 24-27, 44-51) seven reported the receipt of  
3 radiotherapy,(19, 20, 25-27, 43, 52) and two reported the receipt of any treatment.(17,  
4 46)

5 Thirty-two of the forty-one studies adjusted or stratified for at least one other factor.(12-  
6 26, 32-41, 44-49, 51) The remaining nine studies provided unadjusted rates.(27-31, 42,  
7 43, 50, 52)

#### 8 *Risk of bias in studies*

9 Assessments of the risk of bias are summarised in Figure 3 and Appendix S6. The  
10 domain most at risk of bias was study confounding, with sixteen studies at high risk of  
11 bias.(13, 27-31, 39-43, 47-50, 52) Although some of these studies conducted adjusted  
12 analyses, important factors such as stage were unaccounted for.

#### 13 **Results of studies reporting variations in the system interval**

##### 14 *Referral to first-seen interval*

15 Three studies evaluated the referral to first-seen interval.(13, 15, 18) Two studies  
16 estimated the odds of being seen by a specialist within two weeks of referral; one  
17 demonstrated reduced unadjusted odds (OR 0.80, 95% CI 0.70-0.91),(18) while there  
18 was no significant association in the other (OR 0.95, 95% CI 0.87-1.03) after adjusting  
19 for age, stage and site (colon vs rectal).(15) (Appendix S8)

20 Another study used generalised linear modelling to estimate the association between  
21 occupation and the number of days to see a specialist after referral, adjusting for age,  
22 marital status and ethnicity.(13) This study reported no significant association  
23 ( $p>0.05$ ).(13) Overall, the evidence was inconclusive for an association between  
24 deprivation and the referral to first-seen interval. (Table 1; Appendix S8)



1  
2  
3  
4  
5  
6  
7  
8  
9  
10  
11  
12  
13  
14  
15  
16  
17  
18  
19  
20  
21  
22  
23  
24  
25  
26  
27  
28  
29  
30  
31  
32  
33  
34  
35  
36  
37  
38  
39  
40  
41  
42  
43  
44  
45  
46  
47  
48  
49  
50  
51  
52  
53  
54  
55  
56  
57  
58  
59  
60

1 *First seen to diagnosis interval*

2 One study estimated the association between occupation and the number of days from  
3 the first hospital appointment to communication of diagnosis.(13) A significant  
4 association was demonstrated ( $p=0.028$ ), but no magnitude or direction of effect was  
5 provided. The evidence was, therefore, inconclusive. (Table 1; Appendix S8)

6 *Diagnosis to treatment interval*

7 Five studies evaluated the diagnosis to treatment interval.(14-18) Two estimated the  
8 number of days from diagnosis to major surgery, adjusting for; stage, sex, age, grade  
9 and morphology.(14, 16) No significant associations were demonstrated (coefficient  
10 0.99, 95% CI 0.97-1.02)(14) (coefficient 0.21, 95% CI -0.55-0.98).(16) (Appendix S8)

11 Two studies evaluated the likelihood of commencing treatment within 31 days from the  
12 date a treatment plan was agreed upon.(15, 18) One study demonstrated increased  
13 unadjusted odds (OR 1.28, 95% CI 1.14-1.44),(18) while the other presented reduced  
14 adjusted odds of patients from the most deprived areas commencing treatment within 31  
15 days (OR 0.91, 95% CI 0.84-0.98).(15) (Appendix S8)

16 Another study calculated the likelihood of treatment for the most deprived quintile  
17 across several time points. They demonstrated reduced adjusted odds of treatment  
18 within one week (OR 0.78, 95% CI 0.72-0.84), one month (OR 0.84, 95% CI 0.78-0.90)  
19 and two to three months (OR 0.91, 95% CI 0.85-0.98) but non-reduced odds at four to  
20 six months (OR 1.07, 95% CI 0.96-1.18) after the first contact with the health  
21 system.(17) (Appendix S8)

22 Overall, the evidence for an association between deprivation and length of the diagnosis  
23 to treatment interval was inconclusive. (Table 1; Appendix S8)

24 *Test to diagnosis interval / secondary care diagnostic interval*

1 One study evaluated the secondary care diagnostic interval (SCDI), defined as the  
2 period between the date of the first interaction with secondary care to the date of  
3 diagnosis.(12) This study evaluated the factors associated with an interval greater than  
4 the median, adjusting for sex, age, stage, comorbidities, ethnicity, route to diagnosis and  
5 additional diagnostic tests.(12) The odds of a longer interval were not significantly  
6 increased for patients from the most deprived quintile (OR 1.07, 95% CI 1.00-1.13).  
7 (Appendix S8)

8 Another study evaluated the time from the first investigation to cancer diagnosis.(23)  
9 The authors conducted quantile regression, adjusting for age, comorbidities, sex, test  
10 type and symptom category, focussing on the median and 75<sup>th</sup> centiles.(23) There was  
11 no significant association between deprivation and interval length (coefficient 0.7, 95%  
12 CI -2.7-4.1). (Appendix S8)

13 Overall, there was no evidence of a prolonged SCDI or test-to-diagnosis interval for  
14 patients from the most deprived background. (Table 1; Appendix S8)

#### 15 *First presentation to diagnosis interval*

16 Three studies evaluated the time from the first symptom or feature of colorectal cancer  
17 in primary care records to diagnosis.(21-23) One study demonstrated an association  
18 between deprivation and a longer interval in two of three econometric analyses (pre-to-  
19 post difference-in-differences 95% CI -0.03-0.2 & p=0.147 | event-study difference-in-  
20 differences 95% CI 0.002-0.136 & p=0.043 | semiparametric varying-coefficient  
21 analysis significance stated but not reported).(21) The other two studies conducted  
22 quantile regression, focusing on the median and 75<sup>th</sup> centiles, adjusting for age,  
23 comorbidities, sex and type of symptom.(22, 23) Both studies demonstrated an  
24 association between the most deprived quintile and a longer first presentation to  
25 diagnosis interval for patients with colon cancer (e.g. adjusted median interval of 204

1  
2  
3  
4  
5  
6  
7  
8  
9  
10  
11  
12  
13  
14  
15  
16  
17  
18  
19  
20  
21  
22  
23  
24  
25  
26  
27  
28  
29  
30  
31  
32  
33  
34  
35  
36  
37  
38  
39  
40  
41  
42  
43  
44  
45  
46  
47  
48  
49  
50  
51  
52  
53  
54  
55  
56  
57  
58  
59  
60

1 versus 126 days,  $p=0.04$ ).(22) Meanwhile, there was no such association among patients  
2 with rectal cancer,(23) possibly reflecting that patients with rectal cancer are more  
3 likely to present with localising symptoms. (Appendix S8)

4 Overall, three robust studies provided evidence that patients from the most deprived  
5 quintile experienced a longer first presentation to diagnosis interval. (Table 1; Appendix  
6 S8)

#### 7 *Symptom to diagnosis interval*

8 One study estimated the effect of occupation on the time between a patient's first  
9 symptom and diagnosis.(13) No significant effect was demonstrated, adjusting for  
10 ethnicity, age, marital status and sex ( $p>0.05$ ).(13) (Table 1; Appendix S8)

#### 11 *Referral to treatment interval*

12 Four studies evaluated the time from referral to treatment.(15, 18-20) Two studies  
13 demonstrated no significant association between deprivation and the likelihood of  
14 commencing treatment within 62 days of referral (range of ORs 1.02-1.07).(18, 19)  
15 Another study demonstrated reduced odds of patients commencing treatment within 62  
16 days of referral, adjusted for age, stage, referral interval and first treatment received  
17 (OR 0.82, 95% CI 0.74-0.91).(15) (Appendix S8)

18 Meanwhile, one study estimated hazard ratios for the time between referral and first  
19 treatment, adjusting for stage, distance and presentation.(20) There was no significant  
20 association between deprivation and time to treatment (HR 1.24, 95% CI 0.93-1.67).  
21 (Appendix S8)

22 Overall, the association between deprivation and this interval was inconclusive. (Table  
23 1; Appendix S8)

#### 24 **Results of studies reporting treatment inequalities**

1  
2  
3  
4  
5  
6  
7  
8  
9  
10  
11  
12  
13  
14  
15  
16  
17  
18  
19  
20  
21  
22  
23  
24  
25  
26  
27  
28  
29  
30  
31  
32  
33  
34  
35  
36  
37  
38  
39  
40  
41  
42  
43  
44  
45  
46  
47  
48  
49  
50  
51  
52  
53  
54  
55  
56  
57  
58  
59  
60

1 *Results of studies reporting likelihood of receipt of primary surgery*

2 The outcome of interest was primary surgery in eleven studies, here defined as resection  
3 of the tumour.(19, 20, 24-31, 36) Five studies clearly defined the outcome as a tumour  
4 resection,(25, 27-29, 36) while the received surgical procedure was not identified in the  
5 other six studies.(19, 20, 24, 26, 30, 31) (Appendix S9)

6 Across seven studies, adjustment was made for different factors: age,(19, 20, 24-26, 29,  
7 36) stage,(19, 20, 24-26, 36) sex,(19, 24-26, 29, 36) comorbidity,(24, 25, 36) site (colon  
8 vs rectum),(19, 25, 36) distance or time to hospital,(20, 26) year of diagnosis,(24, 36)  
9 region,(19) and histology, grade and presentation.(36) Meanwhile, four studies provided  
10 only rates of patients receiving surgery.(27, 28, 30, 31) (Appendix S9)

11 Six studies presented reduced odds of surgery for patients from the most deprived  
12 background (range of ORs 0.32-0.99).(24, 26-28, 30, 31) One study presented increased  
13 odds of *not* receiving surgery amongst the most deprived patients with rectal cancer  
14 (OR 1.35, 95% CI 1.22-1.49) but no significant association among patients with colon  
15 cancer (OR 0.96, 95% CI 0.87-1.07).(36) Meanwhile, three studies demonstrated no  
16 association (range of ORs 0.52-0.88).(19, 20, 29)

17 One study revealed a higher likelihood of surgery for patients from the most deprived  
18 background (OR 1.63, 95% CI 1.17-2.26).(25) Additionally, the study reported  
19 increased odds of surgery in older age groups. These findings, which were unexpected,  
20 were confirmed by consulting the author. However, it is important to note that this  
21 analysis was based on regional data from a historical cohort of colorectal cancers  
22 diagnosed between 1997 and 2004. While the reported methodology appears robust, the  
23 results of this small study are opposed to other studies (see Figure 4) and cautious  
24 interpretation is required.

1 Figure 4 displays a forest plot, which provides an overview of the findings from  
2 multiple studies investigating the likelihood of undergoing surgery for colorectal cancer.  
3 The plot reveals that a majority of studies considering primary surgery (10/12) indicate  
4 a decrease in the likelihood of surgical intervention among patients belonging to the  
5 most deprived group. Overall, the evidence strongly supports the hypothesis that  
6 patients from the most deprived group are less likely to receive surgery. (Table 1;  
7 Appendix S9)

#### 8 *Results of studies reporting likelihood of receipt of surgery for oligometastatic disease*

9 Four studies examined the receipt of surgery in presumed oligometastatic disease, all  
10 adjusted for age, stage, comorbidity, and site (colon vs. rectal).(32-35) Three studies  
11 examined the receipt of liver resection, demonstrating significantly reduced odds of  
12 resection for patients from the most deprived group (range of ORs 0.70-0.76).(32-34)  
13 One study examined the receipt of pulmonary resection, with no significant association  
14 demonstrated between deprivation and the likelihood of resection (OR 1.04, 95% CI  
15 0.89-1.22).(35) (Table 1; Appendix S9) Figure 4 displays a forest plot, providing an  
16 overview of the findings from these studies, each highlighted with an asterisk.

#### 17 *Results of studies reporting likelihood of surgical variation*

18 Seven studies evaluated variations in surgery.(37-43) Six reported rates or odds of  
19 abdominoperineal resection (APER) or anterior resection (AR).(37-42) Five studies  
20 adjusted for variables, including age,(37-40) sex,(37-41) stage,(37, 38) year of diagnosis  
21 or resection,(37-41) surgeon workload,(37, 38) and admission type.(37-40) Appendix  
22 S10 displays a forest plot, providing an overview of the findings from these studies.  
23 Five of the seven studies demonstrated that APER was significantly more likely than  
24 AR for patients from the most deprived areas (range of ORs 1.37-1.64).(37, 39-42)  
25 (Table 1; Appendix S11)

1  
2 1 Meanwhile, one study of 120 patients presented unadjusted rates of total pelvic  
3  
4 2 exenteration (TPE) compared with partial pelvic exenteration (PPE).(43) There was a  
5  
6 3 non-significant association between deprivation and the unadjusted odds of TPE (OR  
7  
8 4 1.75, 95% CI 0.55-5.68). (Table 1; Appendix S11)

11 *Results of studies reporting likelihood of receipt of chemotherapy*

12  
13  
14 6 Thirteen studies examined whether patients received any chemotherapy,(19, 20, 24-27,  
15  
16 7 44-50) eleven of which conducted adjusted analyses.(19, 20, 24-26, 44-49) Six studies  
17  
18 8 evaluated the use of adjuvant chemotherapy.(24, 44, 45, 49-51) Two studies evaluated  
19  
20 9 the use of palliative chemotherapy.(24, 46) Meanwhile, the intent of chemotherapy was  
21  
22 10 unknown in the remaining seven studies.(19, 20, 25-27, 47, 48)

23  
24  
25  
26  
27 11 Appendix S12 displays a forest plot, providing an overview of the findings from the  
28  
29 12 studies. Eight studies demonstrated reduced adjusted odds of chemotherapy for patients  
30  
31 13 from the most deprived group (range of ORs 0.44-0.99).(19, 24-26, 44, 45, 47, 48) One  
32  
33 14 study demonstrated reduced adjusted odds for patients from the most deprived group  
34  
35 15 with colon (OR 0.45, 95% CI 0.27-0.77) but not rectal cancer (OR 0.73, 95% CI 0.36-  
36  
37 16 1.50).(46) Two studies did not show a significant association between deprivation and  
38  
39 17 receipt of chemotherapy (range of ORs 0.49-2.13).(20, 49) (Appendix S13)

40  
41  
42  
43  
44 18 Meanwhile, two studies presented unadjusted rates.(27, 50) One demonstrated reduced  
45  
46 19 odds of chemotherapy for the most deprived patients with colorectal cancer (OR 0.31,  
47  
48 20 95% CI 0.09-0.91).(50) The other demonstrated reduced odds of chemotherapy for the  
49  
50 21 most deprived patients with colon (OR 0.85, 95% CI 0.81-0.89) but not rectal cancer  
51  
52 22 (OR 1.03, 95% CI 0.95-1.11).(27) (Appendix S13)

53  
54  
55  
56 23 One study examined the receipt of combination versus single-agent chemotherapy,  
57  
58 24 adjusting for age, sex, ethnicity, tumour size, lymph node yield and year of  
59  
60 25 diagnosis.(51) However, no adjustment was made for co-morbidity. Patients from the

1 most deprived area had significantly reduced odds of receiving combination  
2 chemotherapy (OR 0.50, 95% CI 0.42-0.59).(51) (Appendix S13)  
3 Five of the six studies evaluating the use of adjuvant chemotherapy demonstrated  
4 inequalities.(24, 44, 45, 50, 51) Meanwhile, both studies evaluating the use of palliative  
5 chemotherapy demonstrated similar inequalities.(24, 46) Overall, the evidence strongly  
6 supports the hypothesis that patients from the most deprived group are less likely to  
7 receive chemotherapy or combination adjuvant chemotherapy. (Table 1; Appendix S13)

#### 8 *Results of studies reporting likelihood of receipt of radiotherapy*

9 Seven studies reported receipt of radiotherapy by socioeconomic group.(19, 20, 25-27,  
10 43, 52) Two studies evaluated the use of neoadjuvant radiotherapy.(19, 43) One study  
11 evaluated patterns of pre and post-operative radiotherapy.(52) The intent of  
12 radiotherapy was unknown in four studies.(20, 25-27)  
13 Three studies conducted analyses that adjusted for important factors, including; age,(20,  
14 25, 26) stage,(20, 25, 26) sex,(25, 26) distance or journey time,(20, 26) tumour site  
15 (colon vs rectum),(20) and comorbidity.(25) None of these studies demonstrated a  
16 significant association between deprivation group and radiotherapy (range of ORs 0.85-  
17 0.99). Appendix S14 presents a forest plot, providing an overview of the findings from  
18 these studies. The remaining four studies reported unadjusted rates of radiotherapy.(19,  
19 27, 43, 52) Two of these studies demonstrated increased odds of radiotherapy for  
20 patients from the most deprived group (range of ORs 1.33-1.39).(27, 52) The other two  
21 studies looked at rates of neoadjuvant radiotherapy specifically and did not show a  
22 significant association between deprivation and odds of treatment (range of ORs 1.00-  
23 1.15).(19, 43) (Appendix S15)  
24 Overall, there was no evidence to support an association between socioeconomic status  
25 and receipt of radiotherapy. (Table 1; Appendix S15) This conclusion may depend on

1 the intent of radiotherapy and would, therefore, have been stronger if all outcomes were  
2 differentiated by intent (e.g. neoadjuvant or palliative).

3 *Results of studies reporting receipt of any treatment*

4 Two studies evaluated the likelihood of any treatment by deprivation quintile, adjusting  
5 for age,(17, 46) sex(46) and stage.(17, 46) It was assumed this meant receiving surgery,  
6 radiotherapy, or chemotherapy. However, these outcomes needed to be more clearly  
7 defined. For the most socioeconomically deprived quintile, both studies reported  
8 significantly reduced odds of any treatment within six months of diagnosis(46) or six  
9 months of the first contact with the NHS (range of ORs 0.54-0.87).(17) (Table 1;  
10 Appendix S16)

11



| Specific outcome reported                              | Overall assessment/conclusion                                                                      | No. studies (no. subjects) | Studies demonstrating adverse effect of deprivation | Studies demonstrating protective effect of deprivation | Studies demonstrating no impact of deprivation | Further information                                                         |
|--------------------------------------------------------|----------------------------------------------------------------------------------------------------|----------------------------|-----------------------------------------------------|--------------------------------------------------------|------------------------------------------------|-----------------------------------------------------------------------------|
| Referral to first seen interval                        | Inconclusive impact of deprivation on the length of the referral to first seen interval            | 3 (86,644)                 | 1 Strong(18)                                        | -                                                      | 1 Strong(15)<br>1 Weak(13)                     | Appendix S8: Results of studies reporting variations in the system interval |
| First seen to diagnosis interval                       | Inconclusive impact of deprivation on the length of the first seen to diagnosis interval           | 1 (15,891)                 | -                                                   | 1 Weak(13)                                             | -                                              |                                                                             |
| Referral to treatment interval                         | Inconclusive impact of deprivation on the length of the referral to treatment interval             | 4 (69,892)                 | 1 Strong(15)                                        | -                                                      | 1 Strong(18)<br>2 Weak(19, 20)                 |                                                                             |
| Diagnosis to treatment interval                        | Inconclusive impact of deprivation on the length of the diagnosis to treatment interval            | 5 (292,502)                | 1 Strong(15)<br>1 Moderate(17)                      | 1 Strong(18)                                           | 2 Strong(14, 16)                               |                                                                             |
| Test to diagnosis / secondary care diagnostic interval | No impact of deprivation on the length of the test to diagnosis/secondary care diagnostic interval | 2 (68,794)                 | -                                                   | -                                                      | 2 Strong(12, 23)                               |                                                                             |
| First presentation to diagnosis interval               | Deprivation associated with increased length of the first presentation to diagnosis interval       | 3 (at least 6,951)         | 3 Strong*(21-23)                                    | -                                                      | 1 Strong*(23)                                  |                                                                             |
| Symptom to diagnosis interval                          | Inconclusive impact of deprivation on the length of the symptom to diagnosis interval              | 1 (15,891)                 | -                                                   | -                                                      | 1 Weak(13)                                     |                                                                             |

Table 1: Narrative synthesis – assessment of the relationship between deprivation, the system interval and treatment received

| Specific outcome reported                         | Overall assessment/conclusion                                                           | No. studies (no. subjects) | Studies demonstrating adverse effect of deprivation                            | Studies demonstrating protective effect of deprivation | Studies demonstrating no impact of deprivation | Further information                                            |
|---------------------------------------------------|-----------------------------------------------------------------------------------------|----------------------------|--------------------------------------------------------------------------------|--------------------------------------------------------|------------------------------------------------|----------------------------------------------------------------|
| Likelihood of receipt of surgery                  | Strong evidence for reduced surgery with increasing deprivation.                        | 11 (374,869)               | 2 Strong*(24, 36)<br>1 Moderate(27)<br>4 Weak(26, 28, 30, 31)                  | 1 Strong(25)                                           | 1 Strong*(36)<br>3 Weak(19, 20, 29)            | Appendix S9: Results – Likelihood of receipt of surgery        |
| Likelihood of receipt of liver resection          | Strong evidence for reduced liver resection with increasing deprivation                 | 3 (285,194)                | 3 Strong(32-34)                                                                | -                                                      | -                                              | Appendix S9: Results – Likelihood of receipt of surgery        |
| Likelihood of receipt of pulmonary resection      | No impact of deprivation on likelihood of pulmonary resection                           | 1 (80,869)                 | -                                                                              | -                                                      | 1 Strong(35)                                   | Appendix S9: Results – Likelihood of receipt of surgery        |
| Likelihood of receipt of APER                     | Strong evidence for increased likelihood of APER vs. AR with increasing deprivation     | 6 (128,946)                | 1 Strong(37)<br>4 Weak(39-42)                                                  | -                                                      | 1 Weak(38)                                     | Appendix S11: Results – Likelihood of surgical variation       |
| Likelihood of receipt of TPE                      | No impact of deprivation on likelihood of TPE vs. PPE with increasing deprivation       | 1 (120)                    | -                                                                              | -                                                      | 1 Weak(43)                                     | Appendix S11: Results – Likelihood of surgical variation       |
| Likelihood of receipt of chemotherapy             | Strong evidence for reduced chemotherapy with increasing deprivation                    | 13 (251,862)               | 4 Strong(24, 25, 44, 45)<br>2 Moderate*(27, 47)<br>5 Weak*(19, 26, 46, 48, 50) | -                                                      | 1 Moderate*(27)<br>3 Weak*(20, 46, 49)         | Appendix S13: Results – Likelihood of receipt of chemotherapy  |
| Likelihood of receipt of combination chemotherapy | Strong evidence for reduced use of combination chemotherapy with increasing deprivation | 1 (8,750)                  | 1 Strong(51)                                                                   | -                                                      | -                                              | Appendix S13: Results – Likelihood of receipt of chemotherapy  |
| Likelihood of receipt of radiotherapy             | No impact of deprivation on likelihood of radiotherapy                                  | 7 (79,053)                 | -                                                                              | 1 Moderate(27)<br>1 Weak(52)                           | 1 Strong(25)<br>4 Weak(19, 20, 26, 43)         | Appendix S15: Results – Likelihood of receipt of radiotherapy  |
| Likelihood of receipt of any treatment            | Moderate evidence for reduced any treatment with increasing deprivation                 | 2 (90,138)                 | 1 Moderate(17)<br>1 Weak(46)                                                   | -                                                      | -                                              | Appendix S16: Results – Likelihood of receipt of any treatment |

Table 1: Narrative synthesis – assessment of the relationship between deprivation, the system interval and treatment received - CONTINUED

\*Studies represented in more than one column due to different conclusions depending on the underlying cancer type (colon vs. rectal cancer).(23, 27, 36, 46)

## 1 **Discussion**

### 2 *Main Findings*

3 This is the first systematic review to evaluate what is already known about the  
4 relationship between socioeconomic status, the system interval, and the treatment that  
5 patients with colorectal cancer receive.

### 6 *Diagnostic and treatment delays*

7 There were seven intervals evaluated. The evidence for system delays was generally  
8 inconclusive, given substantial heterogeneity in methods and outcomes. However, there  
9 was substantial evidence that the first presentation to diagnosis interval was longer for  
10 patients from the most deprived background, depending on the underlying site. The  
11 underlying reasons require further elucidation using qualitative studies. This would help  
12 us understand the extent to which these delays are driven by patient or healthcare factors  
13 and how these can be addressed. Possible causes include missed appointments due to  
14 competing demands such as employment or care responsibilities. (53, 54) Other reasons  
15 might include complex transport and travel arrangements causing difficulties in  
16 attending appointments. (53, 54)

### 17 *Surgery in the management of colorectal cancer*

18 There was strong evidence for inequalities in primary surgery. However, most studies  
19 had limitations; few adjusted for stage, most combined colon and rectal cancers, and  
20 many included patients diagnosed before 2010.

21 There was also strong and consistent evidence that patients from the most deprived  
22 areas were less likely to undergo a liver resection and were more likely to undergo an  
23 APER than anterior resection. APER is associated with a worse quality of life and is  
24 generally considered less preferable if a less deforming surgery is possible.

1  
2 1 Despite adjustment, socioeconomic inequalities were frequently observed. This suggests  
3  
4 2 the presence of uncaptured factors such as co-morbidity or frailty. There may also have  
5  
6 3 been variations in access to specialist care, financial and employment factors, patient  
7  
8 4 choice, health-seeking behaviours and health literacy, all of which warrant further  
9  
10 5 investigation.(55-57)

#### 6 *Chemotherapy in the management of colorectal cancer*

7 There was strong evidence that patients from more deprived areas were less likely to  
8 receive chemotherapy or combination adjuvant chemotherapy. Trust in clinicians,  
9 financial and employment factors, social support, adequate communication and  
10 provision of information are critical in influencing the use of chemotherapy.(58-61)  
11 These, amongst other uncaptured factors such as comorbidity or frailty, could be  
12 responsible for the observed inequalities.

#### 13 *Radiotherapy in the management of rectal cancer*

14 There was no evidence that patients from more deprived areas were less likely to  
15 receive radiotherapy. The absence of observed inequalities could reflect the nature of  
16 this outpatient treatment and the availability of patient transport. This is compared with,  
17 for example, surgery, which necessitates hospital admission and prolonged time away  
18 from work and social support. A lung cancer study similarly demonstrated a greater  
19 likelihood of radiotherapy but a reduced likelihood of surgery amongst less affluent  
20 patients.(62)

#### 21 **Strengths and weaknesses**

22 This systematic review identified many studies and employed a robust methodology.  
23 The process of identifying search terms was thorough, and the search was validated.  
24 The searches were extensive, conducted across eight databases, supplemented with  
25 citation searching and a thorough examination of the grey literature. These additional

1 search methods identified six studies.(27, 28, 35, 36, 44, 52) Inclusion of non-peer-  
2 reviewed literature was also a key strength of this review.(25, 27, 28, 36)  
3 The included studies were, however, heterogeneous in the methodology and populations  
4 studied. Out of forty-one studies, only fifteen included patients diagnosed after  
5 2010.(12, 14, 18, 21-23, 27, 32, 33, 35, 36, 43-45, 51) Of the six studies evaluating the  
6 system interval in patients diagnosed since 2010, four demonstrated some  
7 inequalities.(18, 21-23) Meanwhile, seven out of the nine studies that evaluated  
8 inequalities in treatments amongst patients diagnosed after 2010 demonstrated the  
9 presence of inequalities.(27, 32, 33, 36, 44, 45, 51) Therefore, although most studies  
10 included patients from over a decade ago, inequalities persisted in recent cohorts despite  
11 a national focus on reducing inequalities.

12 Another limitation was that studies frequently analysed colorectal cancer as a single  
13 disease despite differences in presentation and management. Significantly, no study  
14 utilised causal inference approaches, exemplified by an absence of reported directed  
15 acyclic graphs.(63) The methods used could have introduced a bias known as the “table  
16 2 fallacy”, whereby estimates from regression models are mistakenly interpreted.(63)  
17 Using a causal approach to future studies would considerably strengthen the  
18 interpretation and, thus, meaningfully impact policy.(64)

### 19 **Implications for policy and practice**

20 Due to significant heterogeneity across studies, we could not firmly conclude whether  
21 patients from more deprived backgrounds systematically experience longer system  
22 intervals. However, COVID-19 detrimentally impacted cancer diagnostic activity for  
23 most patients, especially those in deprived areas.(5) It is important to ensure measures  
24 are in place to monitor the system interval for patients most at risk of delays.(5)

1 There was strong evidence of socioeconomic inequalities in surgery and chemotherapy.  
2 Some inequalities may partly be due to wording in clinical guidelines. For example, the  
3 National Institute for Health and Care Excellence advises that primary surgery for  
4 colorectal cancer is “offered” (a strong recommendation); the same guideline advises  
5 liver resection be “considered” (less certain benefit).(65) Similarly, adjuvant  
6 chemotherapy can be estimated to reduce the risk of death in stage III disease by 10-  
7 15%. However, there is a significant risk of long-term toxicity. Patients must carefully  
8 weigh the potential harms and benefits of these less strongly recommended treatments.  
9 Shared-decision making is vital. Inequalities will result when some patients experience  
10 better shared-decision making and can cover the costs of additional treatment, such as  
11 time off work.(66)

12 Clinicians can mitigate some of the effects of deprivation. Such strategies may include  
13 referring patients for pre-rehabilitation, tailored communication, and ensuring patients  
14 are aware of appropriate financial support and transport schemes.(66)

15 Further studies are needed to evaluate for inequalities in novel treatments. In the era of  
16 precision oncology and an ever-increasing armamentarium of novel treatments, the  
17 marginal benefits of new therapies mustn’t just be experienced by the most affluent. A  
18 prostate cancer study exemplified this, demonstrating that patients from more deprived  
19 backgrounds living at greater distances from specialist centres were significantly less  
20 likely to receive robotic prostatectomy.(67) If we accept the benefit of newer surgical  
21 technology and techniques, such as robotic surgery, these should be available for all  
22 patients no matter where they live.

### 23 **Future research**

24 Further research evaluating the whole of the system interval is needed. Further research  
25 should also aim to understand why deprivation is associated with a reduced likelihood

1 of chemotherapy and surgery. In particular, observational research of recent cohorts  
2 should utilise causal inference. Beyond this, qualitative research will be of great value  
3 in gaining a richer insight into the causes and drivers of these inequalities.

#### 4 **Conclusions**

5 Despite a healthcare system that provides free healthcare at the point of access, there  
6 were unexplained socioeconomic inequalities in surgery, chemotherapy and aspects of  
7 the system interval. Further research is needed to understand the variations in treatment  
8 between socioeconomic groups.

9 Differences in patient selection for treatment have been linked with worse colorectal  
10 cancer survival within and between countries, with evidence of improved outcomes  
11 when care is aligned with optimal pathways.(68) Eliminating inequalities could narrow  
12 survival gaps within and between countries. These findings will interest policymakers,  
13 clinicians and researchers worldwide, as inequalities in cancer care and outcomes of  
14 different socioeconomic groups have been recognised across healthcare jurisdictions.

#### 15 **Figure Captions**

16 Figure 1: PRISMA flow diagram of included studies.

17 Figure 2: Time intervals evaluated in the included studies. The blue dotted line indicates  
18 the system interval defined by the Aarhus statement. Studies that included any aspect of  
19 this system interval were included, even if the interval commenced before the system  
20 interval defined here.

21 Figure 3: Risk of bias in the included studies. For each element the proportion of studies  
22 with high, moderate and low risk of bias is illustrated.

23 Figure 4: Forest plot demonstrating the odds of receipt of surgery in the most deprived  
24 versus the least deprived patient group.

#### 25 **Additional Information**

#### 26 **Acknowledgements**

27 Not applicable.

## 1 **Authors' Contributions**

2 BPS – conceptualisation, developed search strategy, screening, data curation and formal  
3 analysis, project administration and writing – original draft.

4 KS – conceptualisation, screening, data curation and formal analysis, review of the  
5 manuscript

6 MS – screening and review of the manuscript

7 SG – developed the search strategy and manuscript review.

8 ML – conceptualisation, supervision, review of the manuscript

9 UM – conceptualisation, developed search strategy, screening, data curation and formal  
10 analysis, supervision, and manuscript review.

## 11 **Ethics Approval and Consent to Participate**

12 This systematic review synthesises previously published data and does not include new  
13 data that requires ethical approval and consent.

## 14 **Consent for Publication**

15 Not applicable.

## 16 **Data Availability**

17 This published article and its supplementary information files include all data generated  
18 or analysed during this study.

## 19 **Competing Interests**

20 The authors declare no conflict of interest.

21



## References

1. Cancer Research UK. Bowel cancer statistics: Bowel cancer mortality. Online [Available from: <https://www.cancerresearchuk.org/health-professional/cancer-statistics/statistics-by-cancer-type/bowel-cancer#heading-Zero>].
2. Araghi M, Arnold M, Rutherford MJ, Guren MG, Cabasag CJ, Bardot A, et al. Colon and rectal cancer survival in seven high-income countries 2010–2014: variation by age and stage at diagnosis (the ICBP SURVMARK-2 project). *Gut*. 2020;gutjnl-2020-320625.
3. Afshar N, English DR, Blakely T, Thursfield V, Farrugia H, Giles GG, et al. Differences in cancer survival by area-level socio-economic disadvantage: A population-based study using cancer registry data. *PLOS ONE*. 2020;15(1):e0228551.
4. Weller D, Vedsted P, Rubin G, Walter FM, Emery J, Scott S, et al. The Aarhus statement: improving design and reporting of studies on early cancer diagnosis. *British Journal of Cancer*. 2012;106(7):1262-7.
5. Watt T, Sullivan R, Aggarwal A. Primary care and cancer: an analysis of the impact and inequalities of the COVID-19 pandemic on patient pathways. *BMJ Open*. 2022;12(3):e059374.
6. Lyratzopoulos G, Barbiere JM, Rachet B, Baum M, Thompson MR, Coleman MP. Changes over time in socioeconomic inequalities in breast and rectal cancer survival in England and Wales during a 32-year period (1973–2004): the potential role of health care. *Annals of Oncology*. 2011;22(7):1661-6.
7. Martin AR, Kanai M, Kamatani Y, Okada Y, Neale BM, Daly MJ. Clinical use of current polygenic risk scores may exacerbate health disparities. *Nature Genetics*. 2019;51(4):584-91.
8. Page MJ, McKenzie JE, Bossuyt PM, Boutron I, Hoffmann TC, Mulrow CD, et al. The PRISMA 2020 statement: an updated guideline for reporting systematic reviews. *BMJ*. 2021;372:n71.
9. Hayden JA, van der Windt DA, Cartwright JL, Côté P, Bombardier C. Assessing Bias in Studies of Prognostic Factors. *Annals of Internal Medicine*. 2013;158(4):280-6.
10. Campbell M, McKenzie JE, Sowden A, Katikireddi SV, Brennan SE, Ellis S, et al. Synthesis without meta-analysis (SWiM) in systematic reviews: reporting guideline. *BMJ*. 2020;368:l6890.
11. Haddaway NR, Page MJ, Pritchard CC, McGuinness LA. PRISMA2020: An R package and Shiny app for producing PRISMA 2020-compliant flow diagrams, with interactivity for optimised digital transparency and Open Synthesis. *Campbell Systematic Reviews*. 2022;18(2):e1230.
12. Pearson C, Fraser J, Peake M, Valori R, Poirier V, Coupland VH, et al. Establishing population-based surveillance of diagnostic timeliness using linked cancer registry and administrative data for patients with colorectal and lung cancer. *Cancer Epidemiology*. 2019;61:111-8.
13. Neal RD, Allgar VL. Sociodemographic factors and delays in the diagnosis of six cancers: analysis of data from the ‘National Survey of NHS Patients: Cancer’. *British Journal of Cancer*. 2005;92(11):1971-5.
14. Saito MK, Quaresma M, Fowler H, Majano SB, Rachet B. Exploring socioeconomic differences in surgery and in time to elective surgery for colon cancer in England: Population-based study. *Cancer Epidemiology*. 2021;71:101896.
15. Hayes L, Adams J, McCallum I, Forrest L, Hidajat M, White M, et al. Age-related and socioeconomic inequalities in timeliness of referral and start of treatment in colorectal cancer: a population-based analysis. *Journal of Epidemiology and Community Health*. 2021;75(1):1.

16. Redaniel M, Martin R, Blazeby J, Wade J, Jeffreys M. The association of time between diagnosis and major resection with poorer colorectal cancer survival: a retrospective cohort study. *BMC Cancer*. 2014;14.
17. Lejeune C, Sassi F, Ellis L, Godward S, Mak V, Day M, et al. Socio-economic disparities in access to treatment and their impact on colorectal cancer survival. *International Journal of Epidemiology*. 2010;39(3):710-7.
18. Di Girolamo C, Walters S, Gildea C, Benitez Majano S, Rachet B, Morris M. Can we assess Cancer Waiting Time targets with cancer survival? A population-based study of individually linked data from the National Cancer Waiting Times monitoring dataset in England, 2009-2013. *PLOS ONE*. 2018;13(8):e0201288.
19. Paterson HM, Mander BJ, Muir P, Phillips HA, Wild SH. Deprivation and access to treatment for colorectal cancer in southeast Scotland 2003–2009. *Colorectal Disease*. 2014;16(2):O51-O7.
20. Campbell NC, Elliott AM, Sharp L, Ritchie LD, Cassidy J, Little J. Impact of deprivation and rural residence on treatment of colorectal and lung cancer. *British Journal of Cancer*. 2002;87(6):585-90.
21. Price S, Zhang X, Spencer A. Measuring the impact of national guidelines: What methods can be used to uncover time-varying effects for healthcare evaluations? *Social Science & Medicine*. 2020;258:113021.
22. Benitez Majano S, Lyratzopoulos G, de Wit NJ, White B, Rachet B, Helsper C, et al. Mental Health Morbidities and Time to Cancer Diagnosis Among Adults With Colon Cancer in England. *JAMA Network Open*. 2022;5(10):e2238569-e.
23. Majano SB, Lyratzopoulos G, Rachet B, de Wit NJ, Renzi C. Do presenting symptoms, use of pre-diagnostic endoscopy and risk of emergency cancer diagnosis vary by comorbidity burden and type in patients with colorectal cancer? *British Journal of Cancer*. 2022;126(4):652-63.
24. Hayes L, Forrest L, Adams J, Hidajat M, Ben-Shlomo Y, White M, et al. Age-related inequalities in colon cancer treatment persist over time: a population-based analysis. *Journal of Epidemiology and Community Health*. 2019;73(1):34.
25. Shack L. What factors influence socioeconomic inequalities in colorectal cancer survival? PhD Thesis. <https://researchonline.lshtm.ac.uk>: London School of Hygiene and Tropical Medicine; 2009.
26. Jones AP, Haynes R, Sauerzapf V, Crawford SM, Zhao H, Forman D. Travel time to hospital and treatment for breast, colon, rectum, lung, ovary and prostate cancer. *European Journal of Cancer*. 2008;44(7):992-9.
27. National Cancer Registration and Analysis Service. Chemotherapy, Radiotherapy and Surgical Tumour Resections in England. Workbook 1: "Chemotherapy, Radiotherapy and Tumour Resection by Tumour and Patient Characteristics in England, 2013-2015". National Cancer Registration and Analysis Service Website. 2018 [Accessed October 2022]. Available from: [http://www.ncin.org.uk/cancer\\_type\\_and\\_topic\\_specific\\_work/topic\\_specific\\_work/main\\_cancer\\_treatments](http://www.ncin.org.uk/cancer_type_and_topic_specific_work/topic_specific_work/main_cancer_treatments).
28. National Cancer Intelligence Network. Major surgical resections England, 2004-2006. National Cancer Registration and Analysis Service Website. 2011 [Accessed October 2022]. Available from: [http://www.ncin.org.uk/publications/reports/reports\\_archive](http://www.ncin.org.uk/publications/reports/reports_archive).
29. Pollock AM, Vickers N. Deprivation and emergency admissions for cancers of colorectum, lung, and breast in south east England: ecological study. *BMJ*. 1998;317(7153):245.
30. Bharathan B, Welfare M, Borowski DW, Mills SJ, Steen IN, Kelly SB, et al. Impact of deprivation on short- and long-term outcomes after colorectal cancer surgery. *British Journal of Surgery*. 2011;98(6):854-65.

- 1  
2  
3  
4  
5  
6  
7  
8  
9  
10  
11  
12  
13  
14  
15  
16  
17  
18  
19  
20  
21  
22  
23  
24  
25  
26  
27  
28  
29  
30  
31  
32  
33  
34  
35  
36  
37  
38  
39  
40  
41  
42  
43  
44  
45  
46  
47  
48  
49  
50  
51  
52  
53  
54  
55  
56  
57  
58  
59  
60
31. Harris AR, Bowley Dm Fau - Stannard A, Stannard A Fau - Kurrimboccus S, Kurrimboccus S Fau - Geh JI, Geh Ji Fau - Karandikar S, Karandikar S. Socioeconomic deprivation adversely affects survival of patients with rectal cancer. 2009(1365-2168 (Electronic)).
32. Vallance AE, van der Meulen J, Kuryba A, Braun M, Jayne DG, Hill J, et al. Socioeconomic differences in selection for liver resection in metastatic colorectal cancer and the impact on survival. *European Journal of Surgical Oncology*. 2018;44(10):1588-94.
33. Fenton HM, Taylor JC, Lodge JPA, Toogood GJ, Finan PJ, Young AL, et al. Variation in the Use of Resection for Colorectal Cancer Liver Metastases. *Ann Surg*. 2019;270(5):892-8.
34. Morris EJ, Forman D Fau - Thomas JD, Thomas Jd Fau - Quirke P, Quirke P Fau - Taylor EF, Taylor Ef Fau - Fairley L, Fairley L Fau - Cottier B, et al. Surgical management and outcomes of colorectal cancer liver metastases. *British Journal of Surgery*. 2010;97(7):1110-8.
35. Fenton HM, Finan PJ, Milton R, Shackcloth M, Taylor JC, Treasure T, et al. National variation in pulmonary metastasectomy for colorectal cancer. *Colorectal Disease*. 2021;23(6):1306-16.
36. Saito MK. Socioeconomic inequalities in colorectal cancer survival in England and Japan [PhD]: London School of Hygiene & Tropical Medicine; 2019.
37. Morris E, Quirke P, Thomas JD, Fairley L, Cottier B, Forman D. Unacceptable variation in abdominoperineal excision rates for rectal cancer: time to intervene? *Gut*. 2008;57(12):1690.
38. Nicholson GA, Morrison DS, Finlay IG, Diamant RH, Horgan PG, Molloy RG. Quality of care in rectal cancer surgery. Exploring influencing factors in the West of Scotland. *Colorectal Disease*. 2012;14(6):731-9.
39. Tilney HS, Heriot AG, Purkayastha S, Antoniou A, Aylin P, Darzi AW, et al. A National Perspective on the Decline of Abdominoperineal Resection for Rectal Cancer. *Annals of Surgery*. 2008;247(1).
40. Raine R, Wong W, Scholes S, Ashton C, Obichere A, Ambler G. Social variations in access to hospital care for patients with colorectal, breast, and lung cancer between 1999 and 2006: retrospective analysis of hospital episode statistics. *BMJ*. 2010;340:b5479.
41. Tilney H, Lovegrove RE, Smith JJ, Thompson MR, Tekkis PP, on behalf of the Association of Coloproctology of Great Britain and I. The National Bowel Cancer Project: Social Deprivation Is an Independent Predictor of Nonrestorative Rectal Cancer Surgery. *Diseases of the Colon & Rectum*. 2009;52(6).
42. Smith JJ, Tilney HS, Heriot AG, Darzi AW, Forbes H, Thompson MR, et al. Social deprivation and outcomes in colorectal cancer. *British Journal of Surgery*. 2006;93(9):1123-31.
43. Radwan R, Coyne P, Jones HA-O, Evans M, Davies M, Harris D, et al. Social deprivation in patients requiring pelvic exenterative surgery. *Colorectal Disease*. 2016;18:684-7.
44. Taylor JC, Swinson D, Seligmann JF, Birch RJ, Dewdney A, Brown V, et al. Addressing the variation in adjuvant chemotherapy treatment for colorectal cancer: Can a regional intervention promote national change? *International Journal of Cancer*. 2021;148(4):845-56.
45. Boyle JM, Kuryba A, Cowling TE, Aggarwal A, Hill J, van der Meulen J, et al. Determinants of Variation in the Use of Adjuvant Chemotherapy for Stage III Colon Cancer in England. *Clinical Oncology*. 2020;32(5):e135-e44.

- 1
  - 2
  - 3
  - 4
  - 5
  - 6
  - 7
  - 8
  - 9
  - 10
  - 11
  - 12
  - 13
  - 14
  - 15
  - 16
  - 17
  - 18
  - 19
  - 20
  - 21
  - 22
  - 23
  - 24
  - 25
  - 26
  - 27
  - 28
  - 29
  - 30
  - 31
  - 32
  - 33
  - 34
  - 35
  - 36
  - 37
  - 38
  - 39
  - 40
  - 41
  - 42
  - 43
  - 44
  - 45
  - 46
  - 47
  - 48
  - 49
  - 50
  - 51
  - 52
  - 53
  - 54
  - 55
  - 56
  - 57
  - 58
  - 59
  - 60
46. Crawford SM, Sauerzapf V, Haynes R, Forman D, Jones AP. Social and geographical factors affecting access to treatment of colorectal cancer: a cancer registry study. *BMJ Open*. 2012;2(2):e000410.
47. Pitchforth E, Russell E, Van der Pol M. Access to specialist cancer care: is it equitable? *British Journal of Cancer*. 2002;87(11):1221-6.
48. McLeod A. Variation in the provision of chemotherapy for colorectal cancer. *Journal of Epidemiology and Community Health*. 1999;53(12):775.
49. Bailey C, Corner J, Addington-Hall J, Kumar D, Nelson M, Haviland J. Treatment decisions in older patients with colorectal cancer: the role of age and multidimensional function. *European Journal of Cancer Care*. 2003;12(3):257-62.
50. Hole D, McArdle C. Impact of socioeconomic deprivation on outcome after surgery for colorectal cancer. *Br J Surgery*. 2002;89:586-90.
51. Hassan S, Miles A, Rachet B, Morris M. Variations in the Type of Adjuvant Chemotherapy Among Stage III Colon Cancer Patients in England. *Journal of Gastrointestinal Cancer*. 2023.
52. Morris EJA, Finan PJ, Spencer K, Geh I, Crellin A, Quirke P, et al. Wide Variation in the Use of Radiotherapy in the Management of Surgically Treated Rectal Cancer Across the English National Health Service. *Clinical Oncology*. 2016;28(8):522-31.
53. Laura J, Karl A, Rebecca S, Steven O, Una M, Geoff H, et al. Non-attendance at urgent referral appointments for suspected cancer: a qualitative study to gain understanding from patients and GPs. *British Journal of General Practice*. 2019;69(689):e850.
54. Wilson R, Winnard Y. Causes, impacts and possible mitigation of non-attendance of appointments within the National Health Service: a literature review. *Journal of Health Organization and Management*. 2022;36(7):892-911.
55. Azzani M, Roslani AC, Su TT. The perceived cancer-related financial hardship among patients and their families: a systematic review. *Supportive Care in Cancer*. 2015;23(3):889-98.
56. Ngan TT, Tien TH, Donnelly M, O'Neill C. Financial toxicity among cancer patients, survivors and their families in the United Kingdom: a scoping review. *Journal of Public Health*. 2023:fdad143.
57. Holden CE, Wheelwright S, Harle A, Wagland R. The role of health literacy in cancer care: A mixed studies systematic review. *PLOS ONE*. 2021;16(11):e0259815.
58. Andrews C, Childers TC, Wiseman KD, Lawhon V, Ingram S, Smith ML, et al. Facilitators and barriers to reducing chemotherapy for early-stage breast cancer: a qualitative analysis of interviews with patients and patient advocates. *BMC Cancer*. 2022;22(1):141.
59. Cavalli-Björkman N, Glimelius B, Strang P. Equal cancer treatment regardless of education level and family support? A qualitative study of oncologists' decision-making. *BMJ Open*. 2012;2(4):e001248.
60. Amalraj S, Starkweather C, Nguyen C, Naeim A. Health literacy, communication, and treatment decision-making in older cancer patients. *Oncology (Williston Park, NY)*. 2009;23(4):369-75.
61. Busch EL, Martin C, Dewalt DA, Sandler RS. Functional Health Literacy, Chemotherapy Decisions, and Outcomes among a Colorectal Cancer Cohort. *Cancer Control*. 2015;22(1):95-101.
62. Tataru D, Spencer K, Bates A, Wiczorek A, Jack RH, Peake MD, et al. Variation in geographical treatment intensity affects survival of non-small cell lung cancer patients in England. *Cancer Epidemiology*. 2018;57:13-23.
63. Tennant PWG, Murray EJ, Arnold KF, Berrie L, Fox MP, Gadd SC, et al. Use of directed acyclic graphs (DAGs) to identify confounders in applied health research:

- 1  
2 review and recommendations. *International Journal of Epidemiology*. 2021;50(2):620-  
3 32.
- 4 64. Mark P, Margaret W, Sally JM, Hilary G, Matt E. Evidence for public health  
5 policy on inequalities: 1: The reality according to policymakers. *Journal of*  
6 *Epidemiology and Community Health*. 2004;58(10):811.
- 7 65. National Institute for Health and Care Excellence (NICE). Colorectal cancer.  
8 NICE guideline [NG151]. 2020.
- 9 66. Fitch MI, Sharp L, Hanly P, Longo CJ. Experiencing financial toxicity  
10 associated with cancer in publicly funded healthcare systems: a systematic review of  
11 qualitative studies. *Journal of Cancer Survivorship*. 2022;16(2):314-28.
- 12 67. Aggarwal A, Han L, Tree A, Lewis D, Roques T, Sangar V, et al. Impact of  
13 centralization of prostate cancer services on the choice of radical treatment. *BJU*  
14 *International*. 2023;131(1):53-62.
- 15 68. te Marvelde L, McNair P, Whitfield K, Autier P, Boyle P, Sullivan R, et al.  
16 Alignment with Indices of A Care Pathway Is Associated with Improved Survival: An  
17 Observational Population-based Study in Colon Cancer Patients. *EClinicalMedicine*.  
18 2019;15:42-50.
- 19  
20  
21  
22  
23  
24  
25  
26  
27  
28  
29  
30  
31  
32  
33  
34  
35  
36  
37  
38  
39  
40  
41  
42  
43  
44  
45  
46  
47  
48  
49  
50  
51  
52  
53  
54  
55  
56  
57  
58  
59  
60

### Identification of new studies via databases and registers

### Identification of new studies via other methods

1  
2  
3  
4  
5  
6  
7  
8  
9  
10  
11  
12  
13  
14  
15  
16  
17  
18  
19  
20  
21  
22  
23  
24  
25  
26  
27  
28  
29  
30  
31  
32  
33  
34  
35  
36  
37  
38  
39  
40  
41  
42  
43  
44  
45  
46  
47  
48  
49  
50  
51  
52  
53  
54  
55  
56  
57  
58  
59  
60

Identification

Screening

Included

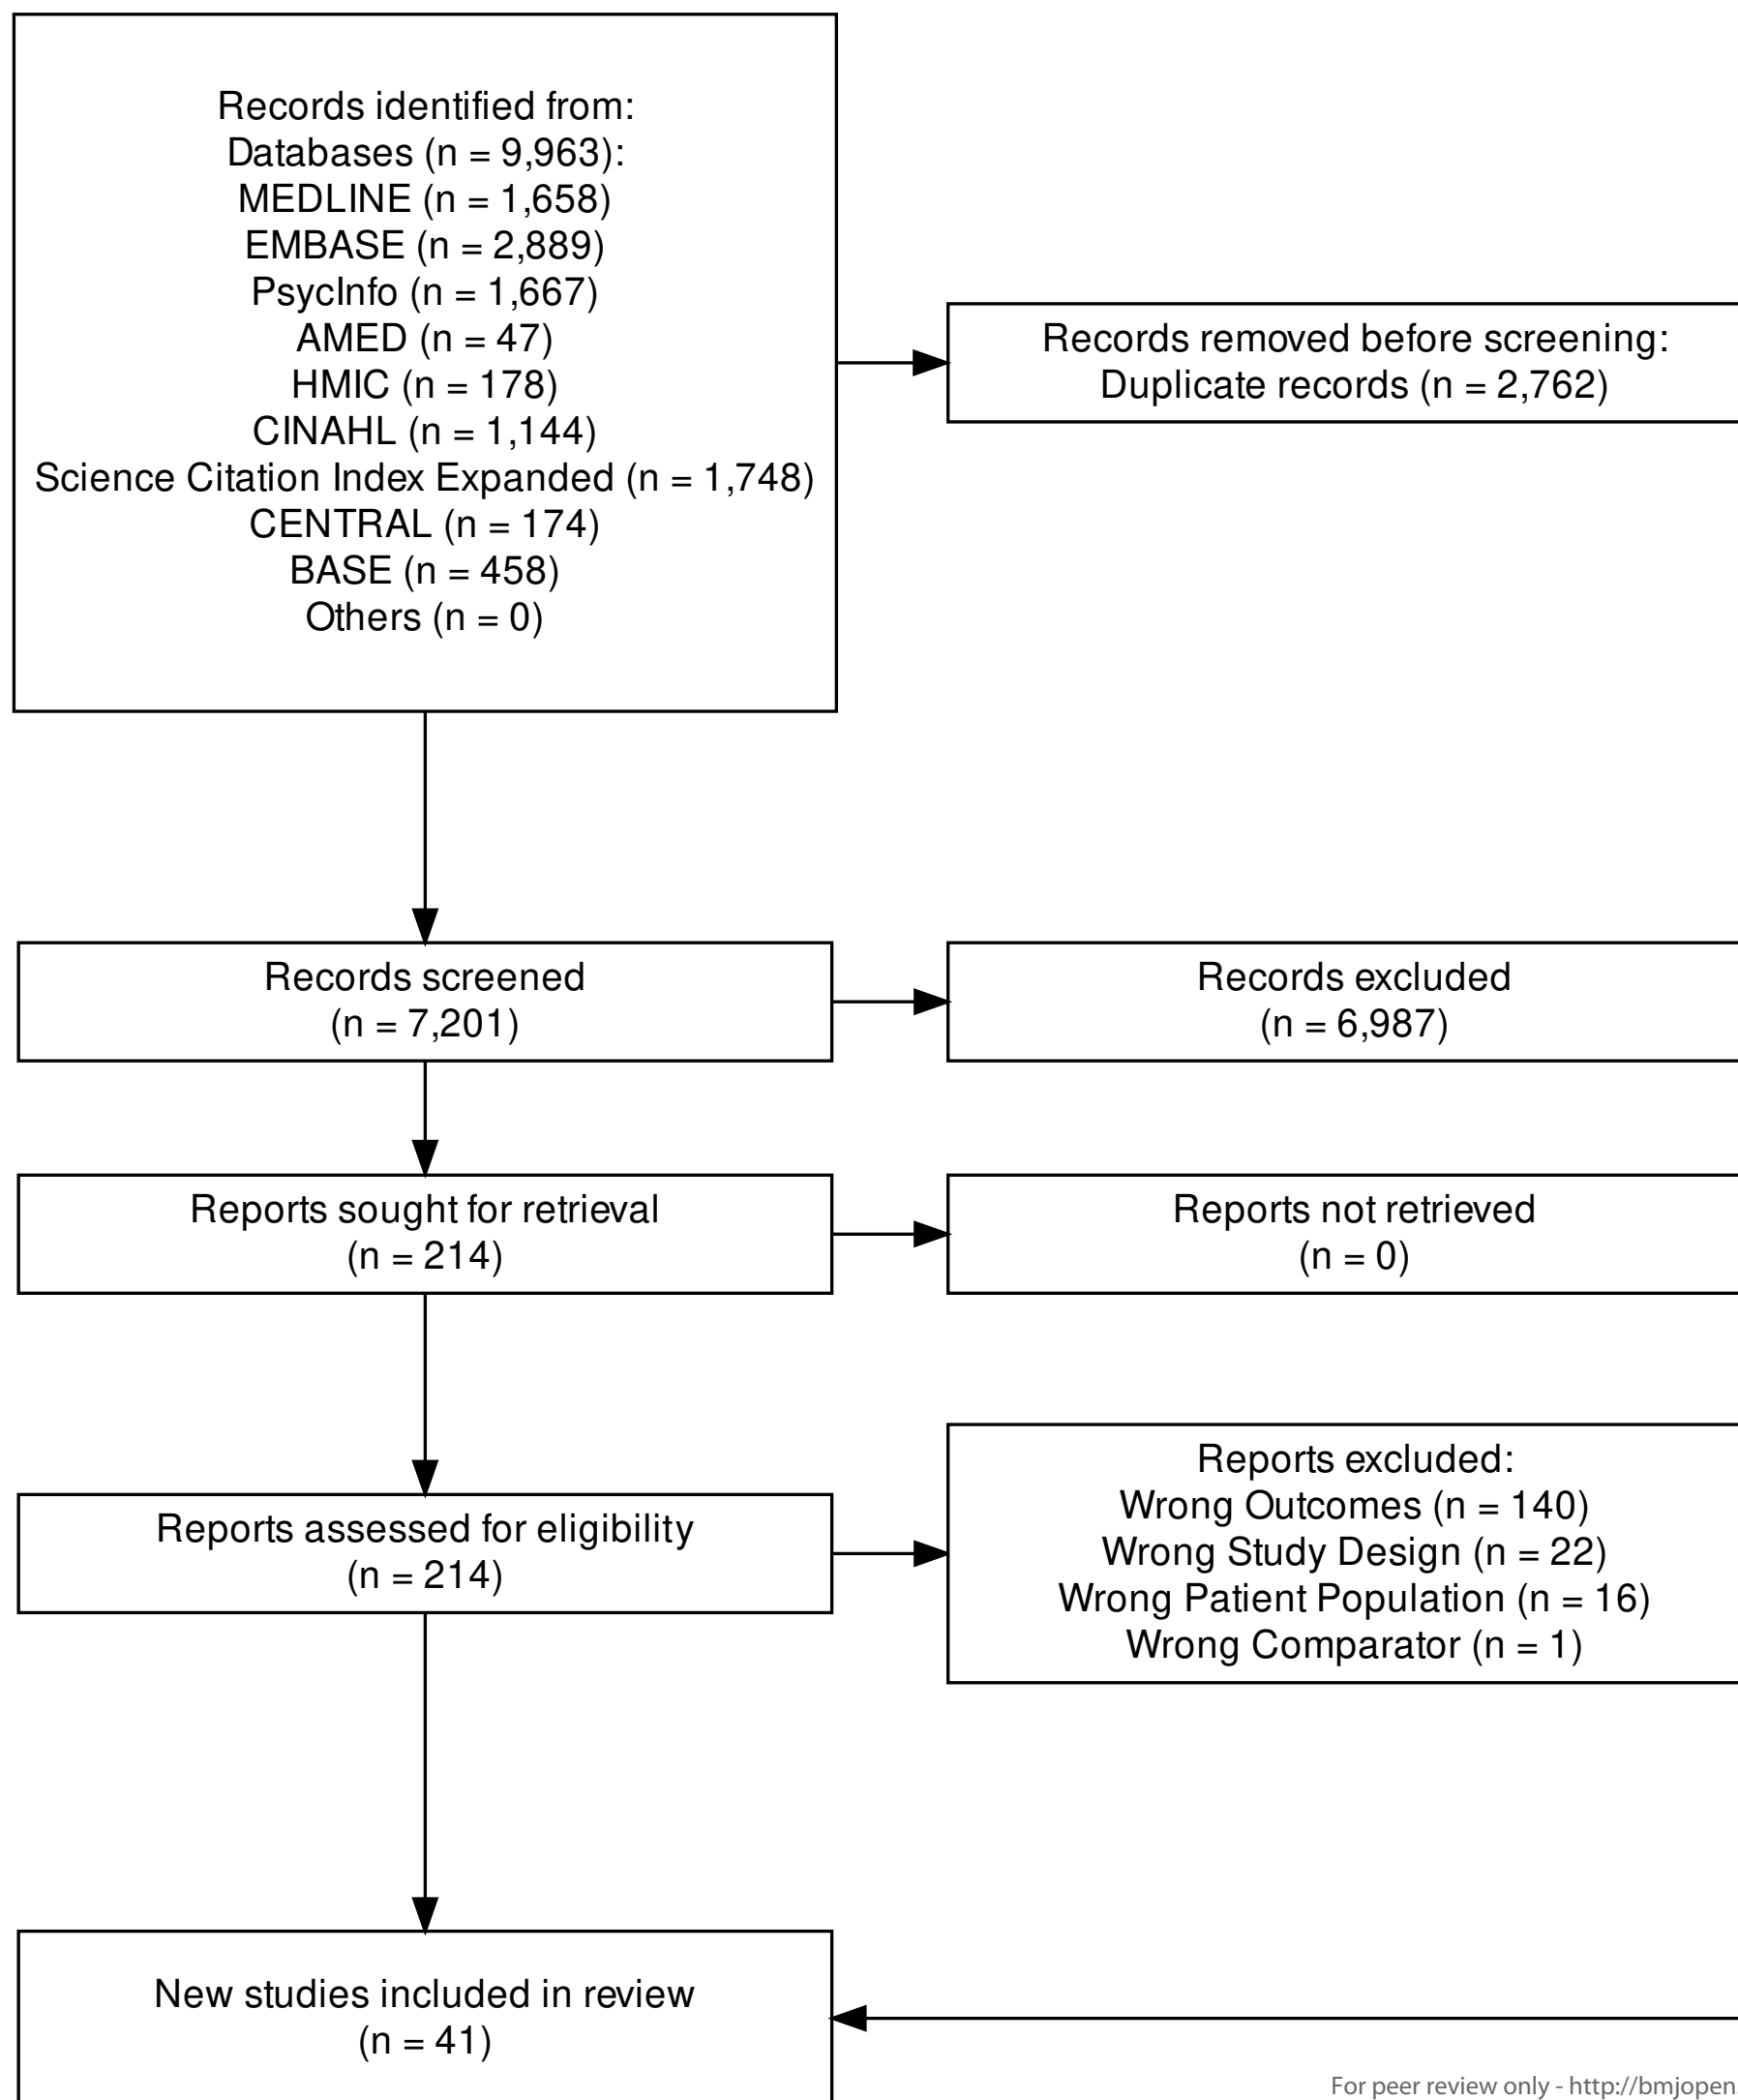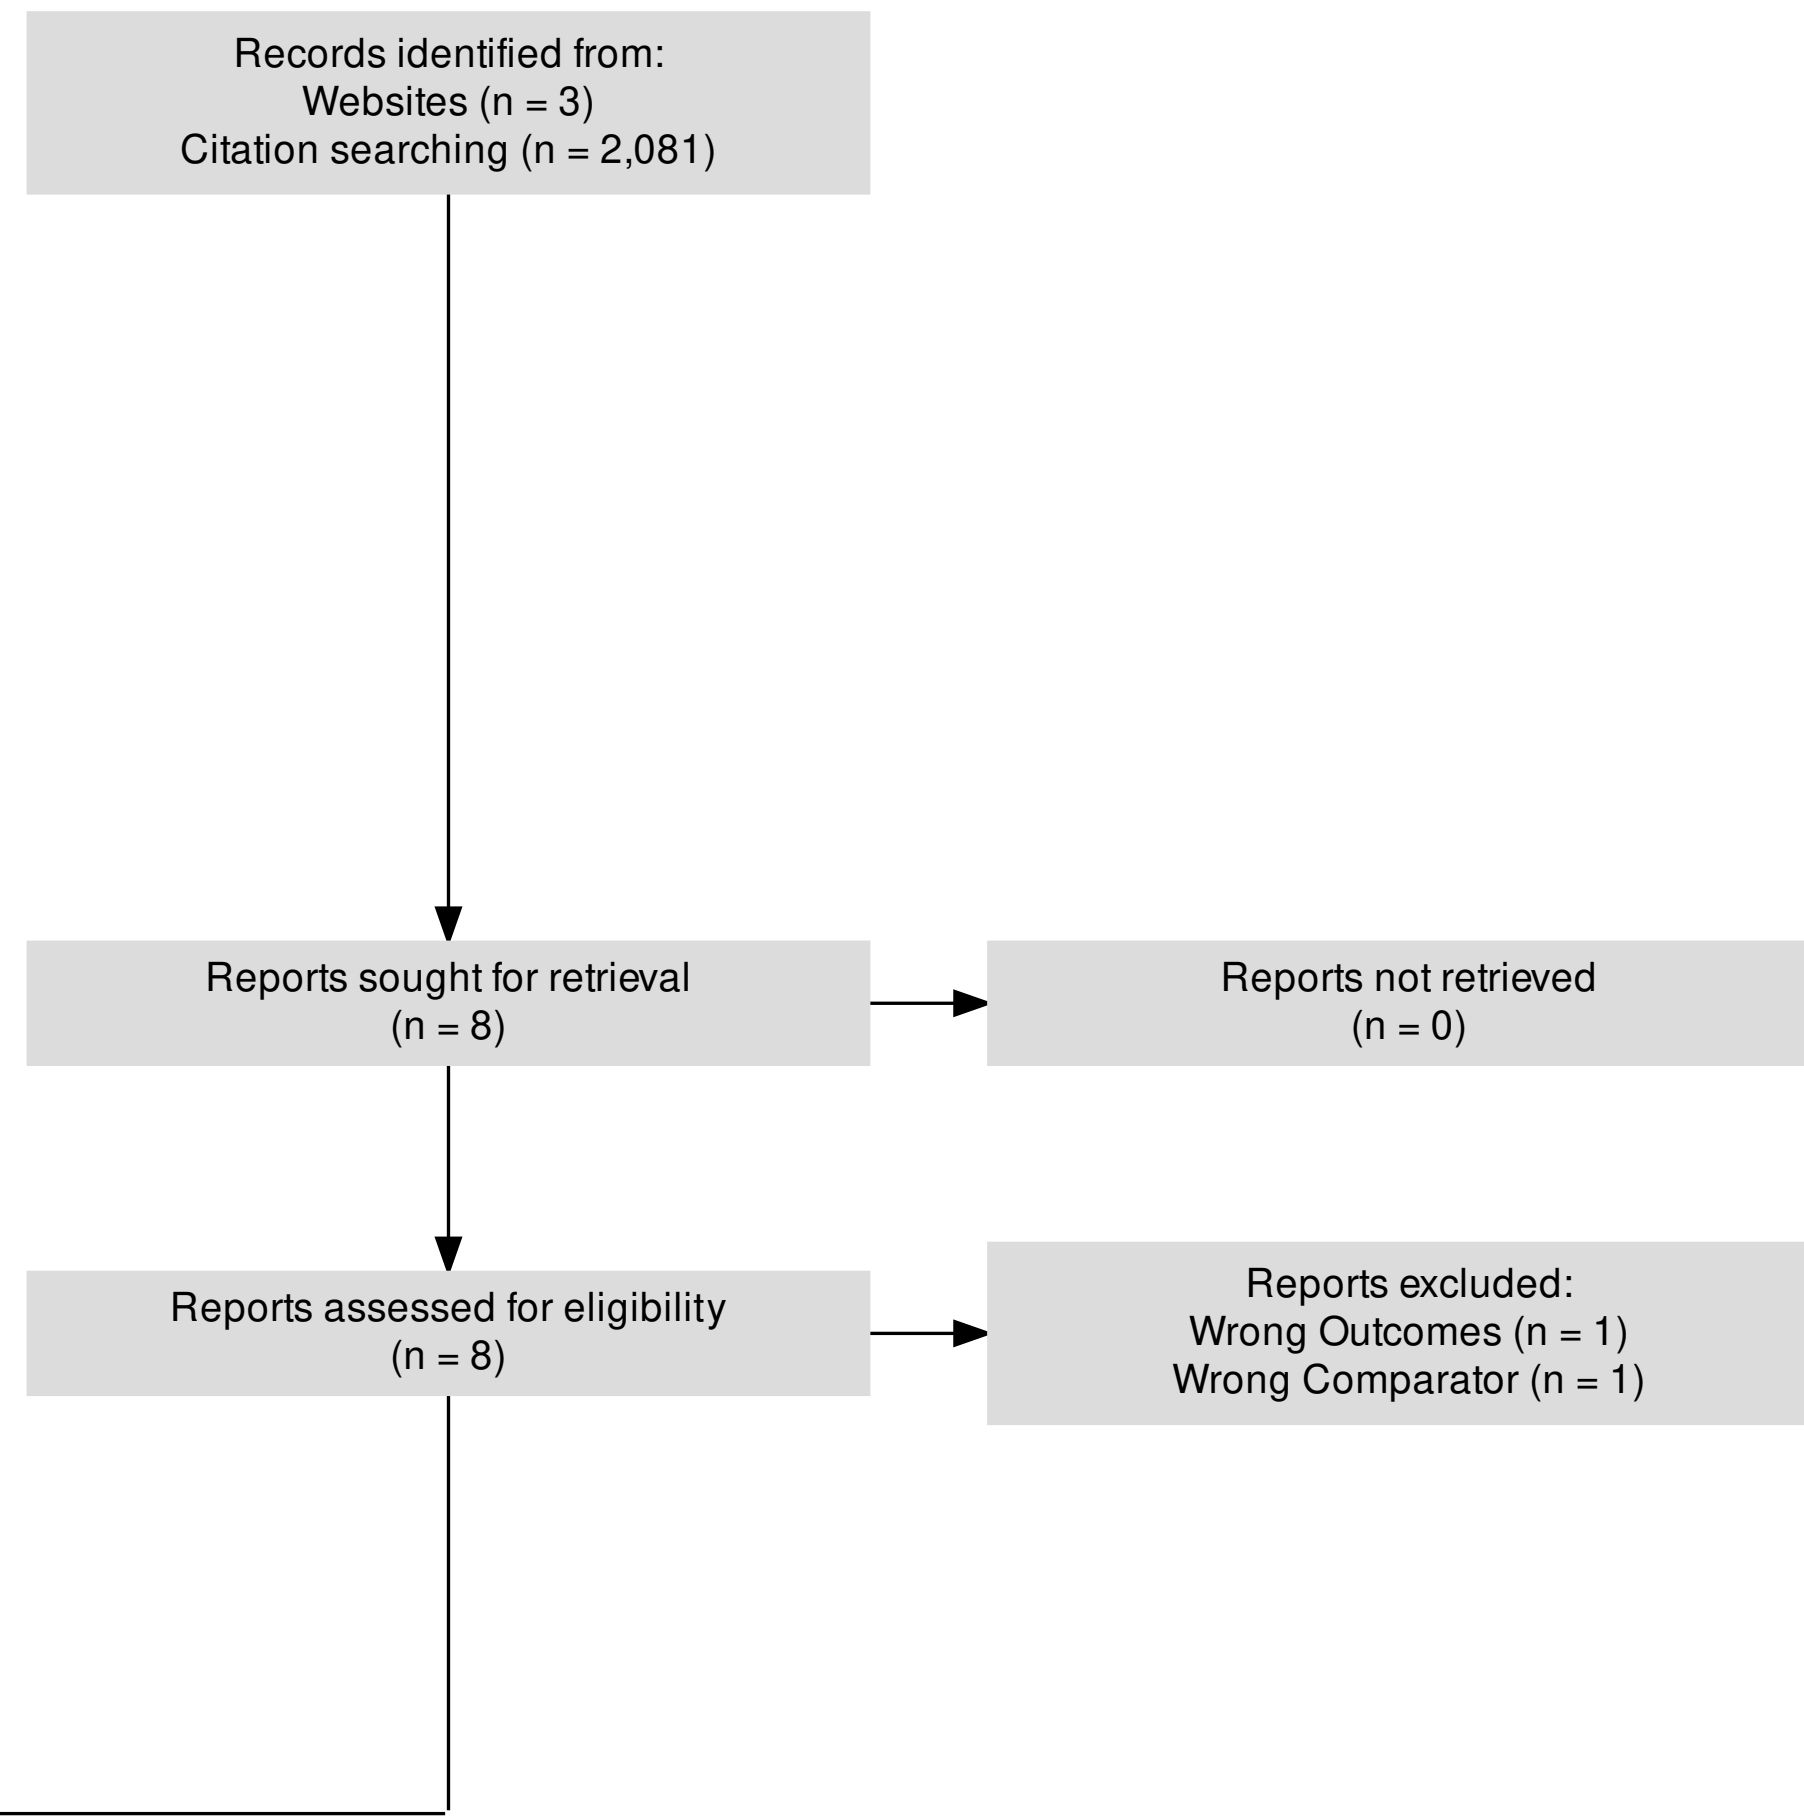

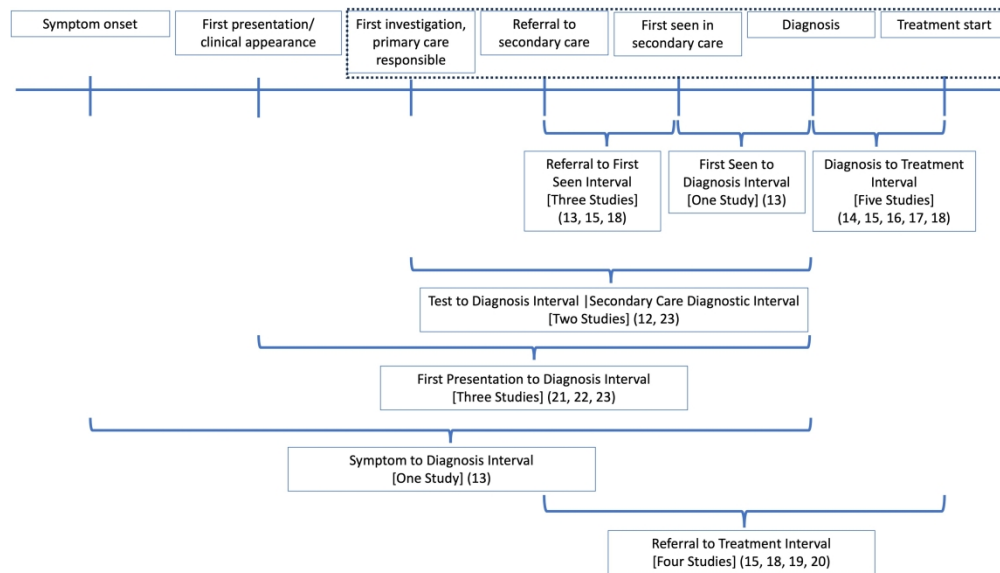

Time intervals evaluated in the included studies. The blue dotted line indicates the system interval defined by the Aarhus statement.(4) Studies that included any aspect of this system interval were included, even if the interval commenced before the system interval defined here.

331x190mm (300 x 300 DPI)

1  
2  
3  
4  
5  
6  
7  
8  
9  
10  
11  
12  
13  
14  
15  
16  
17  
18  
19  
20  
21  
22  
23  
24  
25  
26  
27  
28  
29  
30  
31  
32  
33  
34  
35  
36  
37  
38  
39  
40  
41  
42  
43  
44  
45  
46  
47  
48  
49  
50  
51  
52  
53  
54  
55  
56  
57  
58  
59  
60

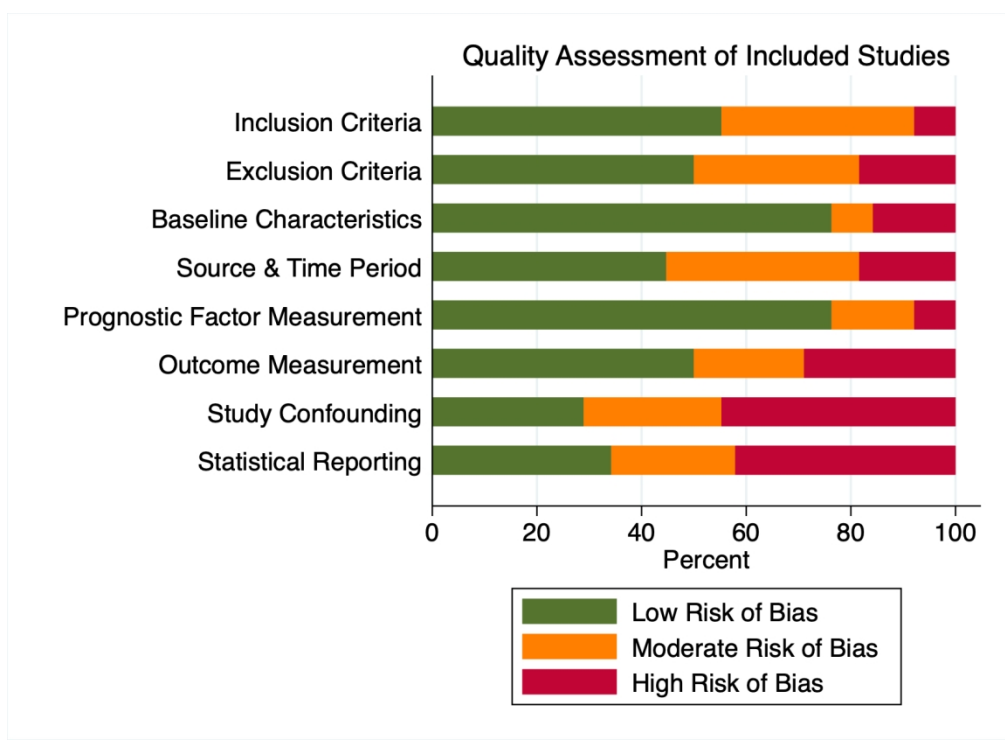

Risk of bias in the included studies. For each element the proportion of studies with high, moderate and low risk of bias is illustrated.

297x215mm (144 x 144 DPI)



1  
2  
3  
4  
5  
6  
7  
8  
9  
10  
11  
12  
13  
14  
15  
16  
17  
18  
19  
20  
21  
22  
23  
24  
25  
26  
27  
28  
29  
30  
31  
32  
33  
34  
35  
36  
37  
38  
39  
40  
41  
42  
43  
44  
45  
46  
47  
48  
49  
50  
51  
52  
53  
54  
55  
56  
57  
58  
59  
60

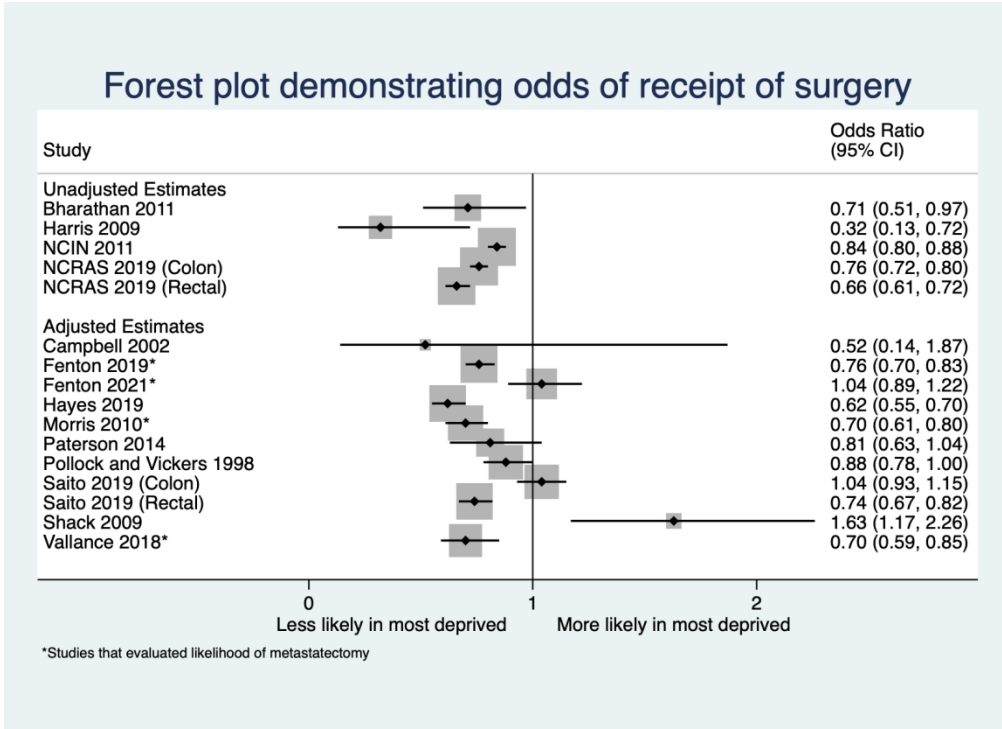

Forest plot demonstrating the odds of receipt of surgery in the most deprived versus the least deprived patient group.

297x215mm (144 x 144 DPI)

# Where are the inequalities in colorectal cancer care in a country with universal healthcare? A systematic review and narrative synthesis

## Appendix

Benjamin Pickwell-Smith, Katie Spencer, Mahboobeh Haji Sadeghi, Sarah Greenley, Mike Lind, Una Macleod

### *Contents*

Appendix S1: PRISMA Statement Checklist – Page 2-4

Appendix S2: List of Hand-Searched Sources and Details of Citation Searches – Page 5

Appendix S3: Search Strategies – Page 6-31

- Appendix S3.1 – MEDLINE – Page 6-8
- Appendix S3.2 – EMBASE – Page 9-11
- Appendix S3.3 – PsycINFO – Page 12-14
- Appendix S3.4 – AMED – Page 15-16
- Appendix S3.5 – HMIC- Page 17-18
- Appendix S3.6 – CENTRAL – Page 19-21
- Appendix S3.7 – Science Citation Index Expanded – Page 22-25
- Appendix S3.8 – CINAHL – Page 26-30
- Appendix S3.9 – Others – Page 31

Appendix S4: Development and Validation of the Search and Record Management – Page 32

Appendix S5: Data Items and Effect Measures – Page 33

Appendix S6: Study Risk of Bias Assessment – Page 34-36

Appendix S7: Characteristics of Included Studies – Page 37-42

Appendix S8: Results – Association between Socioeconomic Status and the System Interval – Page 43-46

Appendix S9: Results – Likelihood of Receipt of Surgery – Page 47-49

Appendix S10: Likelihood of surgical variation - forest plot – Page 50

Appendix S11: Results – Likelihood of Surgical Variation – Page 51

Appendix S12: Likelihood of receipt of chemotherapy – forest plot – Page 52

Appendix S13: Results – Likelihood of Receipt of Chemotherapy – Page 53-55

Appendix S14: Likelihood of receipt of radiotherapy – forest plot – Page 56

Appendix S15: Results – Likelihood of Receipt of Radiotherapy – Page 57-58

Appendix S16: Results – Likelihood of Receipt of Any Treatment – Page 59

References – Page 60-63

Appendix S1: PRISMA Statement Checklist<sup>1</sup>

| Section/topic           | Item # | Checklist item                                                                                                                                                                                                                                                                                       | Reported on page # |
|-------------------------|--------|------------------------------------------------------------------------------------------------------------------------------------------------------------------------------------------------------------------------------------------------------------------------------------------------------|--------------------|
| <b>TITLE</b>            |        |                                                                                                                                                                                                                                                                                                      |                    |
| Title                   | 1      | Identify the report as a systematic review.                                                                                                                                                                                                                                                          | 1                  |
| <b>ABSTRACT</b>         |        |                                                                                                                                                                                                                                                                                                      |                    |
| Abstract                | 2      | As per PRISMA 2020 for Abstracts checklist                                                                                                                                                                                                                                                           | 2-3                |
| <b>INTRODUCTION</b>     |        |                                                                                                                                                                                                                                                                                                      |                    |
| Rationale               | 3      | Describe the rationale for the review in the context of what is already known.                                                                                                                                                                                                                       | 4-5                |
| Objectives              | 4      | Provide an explicit statement of the objective(s) or question(s) the review addresses.                                                                                                                                                                                                               | 5                  |
| <b>METHODS</b>          |        |                                                                                                                                                                                                                                                                                                      |                    |
| Eligibility criteria    | 5      | Specify the inclusion and exclusion criteria for the review and how studies were grouped for the syntheses.                                                                                                                                                                                          | 5-6                |
| Information sources     | 6      | Specify all databases, registers, websites, organisations, reference lists and other sources searched or consulted to identify studies. Specify the date when each source was last searched or consulted.                                                                                            | 6, Appendix S2     |
| Search strategy         | 7      | Present the full search strategies for all databases, registers, and websites, including any filters and limits used.                                                                                                                                                                                | Appendix S3        |
| Study selection         | 8      | Specify the methods used to decide whether a study met the inclusion criteria of the review, including how many reviewers screened each record and each report retrieved, whether they worked independently, and if applicable, details of automation tools used in the process.                     | 6                  |
| Data collection process | 9      | Specify the methods used to collect data from reports, including how many reviewers collected data from each report, whether they worked independently, any processes for obtaining or confirming data from study investigators, and if applicable, details of automation tools used in the process. | 6                  |
| Data items              | 10a    | List and define all outcomes for which data were sought. Specify whether all results that were compatible with each outcome domain in each study were sought (e.g. for all measures, time points, analyses), and if not, the methods used to decide which results to collect.                        | Appendix S5        |
|                         | 10b    | List and define all other variables for which data were sought (e.g. participant and intervention characteristics, funding sources). Describe any assumptions made about any missing or unclear information.                                                                                         | Appendix S5        |

1  
2  
3  
4  
5  
6  
7  
8  
9  
10  
11  
12  
13  
14  
15  
16  
17  
18  
19  
20  
21  
22  
23  
24  
25  
26  
27  
28  
29  
30  
31  
32  
33  
34  
35  
36  
37  
38  
39  
40  
41  
42  
43  
44  
45  
46

|                               |     |                                                                                                                                                                                                                                                                   |                          |
|-------------------------------|-----|-------------------------------------------------------------------------------------------------------------------------------------------------------------------------------------------------------------------------------------------------------------------|--------------------------|
| Study risk of bias assessment | 11  | Specify the methods used to assess risk of bias in the included studies, including details of the tool(s) used, how many reviewers assessed each study and whether they worked independently, and if applicable, details of automation tools used in the process. | 7                        |
| Effect measures               | 12  | Specify for each outcome the effect measure(s) (e.g. risk ratio, mean difference) used in the synthesis or presentation of results.                                                                                                                               | Appendix S5              |
| Synthesis methods             | 13a | Describe the processes used to decide which studies were eligible for each synthesis (e.g. tabulating the study intervention characteristics and comparing against the planned groups for each synthesis (item #5)).                                              | 7                        |
|                               | 13b | Describe any methods required to prepare the data for presentation or synthesis, such as handling of missing summary statistics, or data conversions.                                                                                                             | Appendix S5              |
|                               | 13c | Describe any methods used to tabulate or visually display results of individual studies and syntheses.                                                                                                                                                            | Appendix S5              |
|                               | 13d | Describe any methods used to synthesize results and provide a rationale for the choice(s). If meta-analysis was performed, describe the model(s), method(s) to identify the presence and extent of statistical heterogeneity, and software package(s) used.       | 7                        |
|                               | 13e | Describe any methods used to explore possible causes of heterogeneity among study results (e.g. subgroup analysis, meta-regression).                                                                                                                              | N/A                      |
|                               | 13f | Describe any sensitivity analyses conducted to assess robustness of the synthesized results.                                                                                                                                                                      | N/A                      |
| Reporting bias assessment     | 14  | Describe any methods used to assess risk of bias due to missing results in a synthesis (arising from reporting biases).                                                                                                                                           | N/A                      |
| Certainty assessment          | 15  | Describe any methods used to assess certainty (or confidence) in the body of evidence for an outcome.                                                                                                                                                             | 7                        |
| <b>RESULTS</b>                |     |                                                                                                                                                                                                                                                                   |                          |
| Study selection               | 16a | Describe the results of the search and selection process, from the number of records identified in the search to the number of studies included in the review, ideally using a flow diagram.                                                                      | 8, Figure 1              |
|                               | 16b | Cite studies that might appear to meet the inclusion criteria, but which were excluded, and explain why they were excluded.                                                                                                                                       | N/A                      |
| Study characteristics         | 17  | Cite each included study and present its characteristics.                                                                                                                                                                                                         | 8, Figure 2, Appendix S7 |
| Risk of bias within studies   | 18  | Present assessments of risk of bias for each included study.                                                                                                                                                                                                      | 8, Figure 3, Appendix S6 |
| Results of individual         | 19  | For all outcomes, present, for each study: (a) summary statistics for each group (where appropriate) and                                                                                                                                                          | 8-15, Appendix S8-       |

|                                                |     |                                                                                                                                                                                                                                                                                      |                          |
|------------------------------------------------|-----|--------------------------------------------------------------------------------------------------------------------------------------------------------------------------------------------------------------------------------------------------------------------------------------|--------------------------|
| studies                                        |     | (b) an effect estimate and its precision (e.g. confidence/credible interval), ideally using structured tables or plots.                                                                                                                                                              | S13                      |
| Results of syntheses                           | 20a | For each synthesis, briefly summarise the characteristics and risk of bias among contributing studies.                                                                                                                                                                               | 8, Figure 3, Appendix S6 |
|                                                | 20b | Present results of all statistical syntheses conducted. If meta-analysis was done, present for each the summary estimate and its precision (e.g. confidence/credible interval) and measures of statistical heterogeneity. If comparing groups, describe the direction of the effect. | 8-15, Appendix S8-S13    |
|                                                | 20c | Present results of all investigations of possible causes of heterogeneity among study results.                                                                                                                                                                                       | N/A                      |
|                                                | 20d | Present results of all sensitivity analyses conducted to assess the robustness of the synthesized results.                                                                                                                                                                           | N/A                      |
| Reporting biases                               | 21  | Present assessments of risk of bias due to missing results (arising from reporting biases) for each synthesis assessed.                                                                                                                                                              | N/A                      |
| Certainty of evidence                          | 22  | Present assessments of certainty (or confidence) in the body of evidence for each outcome assessed.                                                                                                                                                                                  | 8-15, Table 1            |
| <b>DISCUSSION</b>                              |     |                                                                                                                                                                                                                                                                                      |                          |
| Discussion                                     | 23a | Provide a general interpretation of the results in the context of other evidence.                                                                                                                                                                                                    | 18-22                    |
|                                                | 23b | Discuss any limitations of the evidence included in the review.                                                                                                                                                                                                                      | 18-22                    |
|                                                | 23c | Discuss any limitations of the review processes used.                                                                                                                                                                                                                                | 18-22                    |
|                                                | 23d | Discuss implications of the results for practice, policy, and future research.                                                                                                                                                                                                       | 18-22                    |
| <b>Other Information</b>                       |     |                                                                                                                                                                                                                                                                                      |                          |
| Registration and protocol                      | 24a | Provide registration information for the review, including register name and registration number, or state that the review was not registered.                                                                                                                                       | 2, 5                     |
|                                                | 24b | Indicate where the review protocol can be accessed, or state that a protocol was not prepared.                                                                                                                                                                                       | 5                        |
|                                                | 24c | Describe and explain any amendments to information provided at registration or in the protocol.                                                                                                                                                                                      | N/A                      |
| Support                                        | 25  | Describe sources of financial or non-financial support for the review, and the role of the funders or sponsors in the review.                                                                                                                                                        | 3,4                      |
| Competing interests                            | 26  | Declare any competing interests of review authors.                                                                                                                                                                                                                                   | 23                       |
| Availability of data, code and other materials | 27  | Report which of the following are publicly available and where they can be found: template data collection forms; data extracted from included studies; data used for all analyses; analytic code; any other materials used in the review.                                           | 23                       |

## Appendix S2: List of Hand-Searched Online Sources and Details of Citation Searches

The following websites were hand-searched on 30/03/2023:

- The National Cancer Registration and Analysis Service (<http://www.ncin.org.uk/home>)
- Cancer Research UK (<https://www.cancerresearchuk.org/>)
- Macmillan Cancer Support (<https://www.macmillan.org.uk>)
- The King's Fund (<https://www.kingsfund.org.uk/>)
- Office for Health Improvement and Disparities (<https://www.gov.uk/government/organisations/office-for-health-improvement-and-disparities>)
- National Bowel Cancer Audit (<https://www.nboca.org.uk>)
- Bowel Cancer UK (<https://www.bowelcanceruk.org.uk>)
- National Health Service England (<https://www.england.nhs.uk/about/equality/equality-hub/>)
- The Association of Coloproctology of Great Britain & Ireland (<https://www.acpgbi.org.uk>)
- NHS Digital (<https://digital.nhs.uk>)
- Health Data Insight CIC (<https://healthdatainsight.org.uk>)
- National Disease Registration Service (<https://www.ndrs.nhs.uk>)

The automated tool 'citationchaser' conducted forward and backward citation searches on thirty-nine included studies where a digital object identifier was available.<sup>2-40</sup>

These searches identified 838 unique records using backwards searching and 1,628 unique records using forwards searching.<sup>41</sup> These records were then screened by BPS in EndNote X9.<sup>42</sup>

The bibliographies of two systematic reviews were also examined for relevant articles.<sup>43,44</sup>

### Appendix S3.1: Search Strategies – MEDLINE (OVID)

Initial searches were conducted on 31<sup>st</sup> August 2021. Repeat searches were conducted across all databases on 26/01/2023, limited to date of database entry between 20/08/2021 to 26/01/2023.

#### Ovid MEDLINE(R) ALL <1946 to August 31, 2021>

1 exp Colorectal Neoplasms/  
 2 ((colon\* or colorectal or rectal) adj3 (cancer\* or neoplas\* or tumor\* or tumour\* or  
 3 malignan\* or carcinoma\* or metasta\* or oncolog\*)).mp  
 4 or/1-2 [cancer population of interest]  
 5 exp Socioeconomic Factors/  
 6 (socio-economic or socioeconomic or socio-demographic or sociodemographic).mp  
 7 exp Education, Continuing/ or Education/  
 8 exp Income/  
 9 exp Health Status/  
 10 exp Poverty/  
 11 (socio-economic position or socioeconomic position).mp.  
 12 inequalities.mp.  
 13 exp Social Environment/  
 14 social factors.mp.  
 15 income.mp.  
 16 exp Residence Characteristics/  
 17 Social class.mp.  
 18 Education.mp.  
 19 exp Health Status Disparities/  
 20 depriv\*.mp.  
 21 (equity or equitable).mp.  
 22 (inequity or inequitable).mp.  
 23 inequities.mp.  
 24 disparit\*.mp.  
 25 or/4-23 [inequality concept]  
 26 surgery.mp.  
 27 Treatment.mp.  
 28 exp Health Services Accessibility/  
 29 exp Healthcare Disparities/  
 30 treatment disparities.mp.  
 31 exp "Delivery of Health Care"/  
 32 exp Primary Health Care/  
 33 exp Drug Therapy/  
 34 chemotherapy.mp.  
 35 Radiotherapy/ or Radiotherapy, Adjuvant/  
 36 radiotherapy.mp.  
 37 accessibility.mp.

1  
 2  
 3 37 access.mp.  
 4 38 pattern\$.mp.  
 5 39 palliative care/ or Patient care/ or Primary Health care/  
 6 40 care.mp.  
 7 41 investigation.mp.  
 8 42 exp "Quality of Health Care"/  
 9 43 exp Patient Selection/ or exp Eligibility Determination/  
 10 44 exp "Referral and Consultation"/  
 11 45 Receipt.mp. or exp "Patient Acceptance of Health Care"/  
 12 46 Provision.mp.  
 13 47 Attendance.mp.  
 14 48 25 or 26 or 27 or 28 or 29 or 30 or 31 or 32 or 33 or 34 or 35 or 36 or 37 or 38 or 39  
 15 or 40 or 41 or 42 or 43 or 44 or 45 or 46 or 47 [treatment concept]  
 16 49 exp "Early Detection of Cancer"/  
 17 50 exp Delayed Diagnosis/  
 18 51 ((patient\* or present\* or doctor\* or physician\* or practitioner\* or hospital\* or  
 19 system\* or (primary adj care) or (secondary adj care) or total or (help adj3 seek) or pre-  
 20 treatment\* or referr\* or specialist\* or consultant\* or surg\* or chemothera\* or radiothera\*  
 21 or treatment\* or diagnos\*) adj5 (delay\* or interval\* or time\* or pathway\* or route\*)).ti,ab.  
 22 52 (stage\* adj5 (diagnosis or diagnostic)).ti,ab.  
 23 53 49 or 50 or 51 or 52 [interval filter]  
 24 54 exp United Kingdom/  
 25 55 (national health service\* or NHS\*).ti,ab,in.  
 26 56 (english not ((published or publication\* or translat\* or written or language\* or  
 27 speak\* or literature or citation\*) adj5 english)).ti,ab.  
 28 57 (gb or "g.b." or britain\* or (british\* not "british columbia") or uk or "u.k." or united  
 29 kingdom\* or (england\* not "new england") or northern ireland\* or northern irish\* or  
 30 scotland\* or scottish\* or ((wales or "south wales") not "new south wales") or  
 31 welsh\*).ti,ab,jw,in.  
 32 58 (bath or "bath's" or ((birmingham not alabama\*) or ("birmingham's" not alabama\*)  
 33 or bradford or "bradford's" or brighton or "brighton's" or bristol or "bristol's" or carlisle\* or  
 34 "carlisle's" or (cambridge not (massachusetts\* or boston\* or harvard\*)) or ("cambridge's"  
 35 not (massachusetts\* or boston\* or harvard\*)) or (canterbury not zealand\*) or  
 36 ("canterbury's" not zealand\*) or chelmsford or "chelmsford's" or chester or "chester's" or  
 37 chichester or "chichester's" or coventry or "coventry's" or derby or "derby's" or (durham not  
 38 (carolina\* or nc)) or ("durham's" not (carolina\* or nc)) or ely or "ely's" or exeter or  
 39 "exeter's" or gloucester or "gloucester's" or hereford or "hereford's" or hull or "hull's" or  
 40 lancaster or "lancaster's" or leeds\* or leicester or "leicester's" or (lincoln not nebraska\*) or  
 41 ("lincoln's" not nebraska\*) or (liverpool not (new south wales\* or nsw)) or ("liverpool's" not  
 42 (new south wales\* or nsw)) or ((london not (ontario\* or ont or toronto\*)) or ("london's" not  
 43 (ontario\* or ont or toronto\*)) or manchester or "manchester's" or (newcastle not (new  
 44 south wales\* or nsw)) or ("newcastle's" not (new south wales\* or nsw)) or norwich or  
 45 "norwich's" or nottingham or "nottingham's" or oxford or "oxford's" or peterborough or  
 46 "peterborough's" or plymouth or "plymouth's" or portsmouth or "portsmouth's" or preston  
 47 or "preston's" or ripon or "ripon's" or salford or "salford's" or salisbury or "salisbury's" or  
 48 sheffield or "sheffield's" or southampton or "southampton's" or st albans or stoke or  
 49 "stoke's" or sunderland or "sunderland's" or truro or "truro's" or wakefield or "wakefield's"  
 50  
 51  
 52  
 53  
 54  
 55  
 56  
 57  
 58  
 59  
 60



1  
2  
3 or wells or westminster or "westminster's" or winchester or "winchester's" or  
4 wolverhampton or "wolverhampton's" or (worcester not (massachusetts\* or boston\* or  
5 harvard\*)) or ("worcester's" not (massachusetts\* or boston\* or harvard\*)) or (york not  
6 ("new york\*" or ny or ontario\* or ont or toronto\*)) or ("york's" not ("new york\*" or ny or  
7 ontario\* or ont or toronto\*))))).ti,ab,in.

8  
9 59 (bangor or "bangor's" or cardiff or "cardiff's" or newport or "newport's" or st asaph  
10 or "st asaph's" or st davids or swansea or "swansea's").ti,ab,in.

11  
12 60 (aberdeen or "aberdeen's" or dundee or "dundee's" or edinburgh or "edinburgh's"  
13 or glasgow or "glasgow's" or inverness or (perth not australia\*) or ("perth's" not australia\*)  
14 or stirling or "stirling's").ti,ab,in.

15  
16 61 (armagh or "armagh's" or belfast or "belfast's" or lisburn or "lisburn's" or  
17 londonderry or "londonderry's" or derry or "derry's" or newry or "newry's").ti,ab,in.

18  
19 62 54 or 55 or 56 or 57 or 58 or 59 or 60 or 61

20  
21 63 (exp africa/ or exp americas/ or exp Antarctic regions/ or exp arctic regions/ or exp  
22 asia/ or exp oceania/) not (exp great britain/ or europe/)

23  
24 64 62 not 63 [NICE UK filter]

25  
26 65 case reports.pt.

27  
28 66 news.pt.

29  
30 67 letter.pt.

31  
32 68 comment.pt.

33  
34 69 exp animals/ not humans.sh.

35  
36 70 65 or 66 or 67 or 68 or 69 [excluding animals and unwanted publication types]

37  
38 71 3 and 24 and 48

39  
40 72 3 and 24 and 53

41  
42 73 71 or 72

43  
44 74 64 and 73

45  
46 75 74 not 70

## Appendix S3.2: Search Strategies – EMBASE (OVID)

### OVID Embase <1974 to 2021 August 31>

1 exp colorectal tumor/  
 2 ((colon\* or colorectal or rectal) adj3 (cancer\* or neoplas\* or tumor\* or tumour\* or  
 3 malignan\* or carcinoma\* or metasta\* or oncolog\*)).mp.  
 4 1 or 2 [cancer population of interest]  
 5 exp socioeconomic/  
 6 (socio-economic or socioeconomic or socio-demographic or sociodemographic).mp.  
 7 exp education/  
 8 exp income/  
 9 exp health status/  
 10 exp poverty/  
 11 (socioeconomic position or socio-economic position).mp.  
 12 inequalities.mp.  
 13 exp social environment/  
 14 social factors.mp.  
 15 income.mp.  
 16 exp demography/  
 17 social class.mp.  
 18 education.mp.  
 19 exp health disparity/  
 20 depriv\*.mp.  
 21 (equity or equitable).mp.  
 22 (inequity or inequitable).mp.  
 23 inequities.mp.  
 24 disparit\*.mp.  
 25 4 or 5 or 6 or 7 or 8 or 9 or 10 or 11 or 12 or 13 or 14 or 15 or 16 or 17 or 18 or 19 or  
 26 20 or 21 or 22 or 23 or 23 [inequality concept]  
 27 surgery.mp.  
 28 treatment.mp.  
 29 exp health care access/  
 30 exp health care disparity/  
 31 treatment disparities.mp.  
 32 exp health care delivery/  
 33 exp primary health care/  
 34 exp drug therapy/  
 35 chemotherapy.mp.  
 36 adjuvant radiotherapy/ or radiotherapy/  
 37 radiotherapy.mp.  
 38 accessibility.mp.  
 39 access.mp.  
 40 pattern\*.mp.  
 41 palliative therapy/ or patient care/ or primary health care/  
 42 care.mp.  
 43 investigation.mp.

1  
 2  
 3 42 exp health care quality/  
 4 43 exp patient selection/99092  
 5 44 exp patient referral/ or exp consultation/  
 6 45 receipt.mp. or exp "Patient attitude"/  
 7 46 provision.mp.  
 8 47 attendance.mp.  
 9  
 10 48 25 or 26 or 27 or 28 or 29 or 30 or 31 or 32 or 33 or 34 or 35 or 36 or 37 or 38 or 39  
 11 or 40 or 41 or 42 or 43 or 44 or 45 or 46 or 47 [treatment concept]  
 12  
 13 49 exp early cancer diagnosis/  
 14 50 exp delayed diagnosis/  
 15 51 ((patient\* or present\* or doctor\* or physician\* or practitioner\* or hospital\* or  
 16 system\* or (primary adj care) or (secondary adj care) or total or (help adj3 seek) or pre-  
 17 treatment\* or referr\* or specialist\* or consultant\* or surg\* or chemothera\* or radiothera\*  
 18 or treatment\* or diagnos\*) adj5 (delay\* or interval\* or time\* or pathway\* or route\*)).ti,ab.  
 19 52 (stage\* adj5 (diagnosis or diagnostic)).ti,ab.  
 20 53 49 or 50 or 51 or 52 [interval filter]  
 21  
 22 54 exp United Kingdom/  
 23 55 (national health service\* or nhs\*).ti,ab,in,ad.  
 24 56 (english not ((published or publication\* or translat\* or written or language\* or  
 25 speak\* or literature or citation\*) adj5 english)).ti,ab.  
 26 57 (gb or "g.b." or britain\* or (british\* not "british columbia") or uk or "u.k." or united  
 27 kingdom\* or (england\* not "new england") or northern ireland\* or northern irish\* or  
 28 scotland\* or scottish\* or ((wales or "south wales") not "new south wales") or  
 29 welsh\*).ti,ab,jx,in,ad.  
 30 58 (bath or "bath's" or ((birmingham not alabama\*) or ("birmingham's" not alabama\*)  
 31 or bradford or "bradford's" or brighton or "brighton's" or bristol or "bristol's" or carlisle\* or  
 32 "carlisle's" or (cambridge not (massachusetts\* or boston\* or harvard\*)) or ("cambridge's"  
 33 not (massachusetts\* or boston\* or harvard\*)) or (canterbury not zealand\*) or  
 34 ("canterbury's" not zealand\*) or chelmsford or "chelmsford's" or chester or "chester's" or  
 35 chichester or "chichester's" or coventry or "coventry's" or derby or "derby's" or (durham not  
 36 (carolina\* or nc)) or ("durham's" not (carolina\* or nc)) or ely or "ely's" or exeter or  
 37 "exeter's" or gloucester or "gloucester's" or hereford or "hereford's" or hull or "hull's" or  
 38 lancaster or "lancaster's" or leeds\* or leicester or "leicester's" or (lincoln not nebraska\*) or  
 39 ("lincoln's" not nebraska\*) or (liverpool not (new south wales\* or nsw)) or ("liverpool's" not  
 40 (new south wales\* or nsw)) or ((london not (ontario\* or ont or toronto\*)) or ("london's" not  
 41 (ontario\* or ont or toronto\*)) or manchester or "manchester's" or (newcastle not (new  
 42 south wales\* or nsw)) or ("newcastle's" not (new south wales\* or nsw)) or norwich or  
 43 "norwich's" or nottingham or "nottingham's" or oxford or "oxford's" or peterborough or  
 44 "peterborough's" or plymouth or "plymouth's" or portsmouth or "portsmouth's" or preston  
 45 or "preston's" or ripon or "ripon's" or salford or "salford's" or salisbury or "salisbury's" or  
 46 sheffield or "sheffield's" or southampton or "southampton's" or st albans or stoke or  
 47 "stoke's" or sunderland or "sunderland's" or truro or "truro's" or wakefield or "wakefield's"  
 48 or wells or westminster or "westminster's" or winchester or "winchester's" or  
 49 wolverhampton or "wolverhampton's" or (worcester not (massachusetts\* or boston\* or  
 50 harvard\*)) or ("worcester's" not (massachusetts\* or boston\* or harvard\*)) or (york not  
 51 ("new york\*" or ny or ontario\* or ont or toronto\*)) or ("york's" not ("new york\*" or ny or  
 52 ontario\* or ont or toronto\*))))).ti,ab,in,ad.  
 53  
 54  
 55  
 56  
 57  
 58  
 59  
 60

1  
2  
3  
4 59 (bangor or "bangor's" or cardiff or "cardiff's" or newport or "newport's" or st asaph  
5 or "st asaph's" or st davids or swansea or "swansea's").ti,ab,in,ad.  
6 60 (aberdeen or "aberdeen's" or dundee or "dundee's" or edinburgh or "edinburgh's"  
7 or glasgow or "glasgow's" or inverness or (perth not australia\*) or ("perth's" not australia\*)  
8 or stirling or "stirling's").ti,ab,in,ad.  
9 61 (armagh or "armagh's" or belfast or "belfast's" or lisburn or "lisburn's" or  
10 londonderry or "londonderry's" or derry or "derry's" or newry or "newry's").ti,ab,in,ad.  
11 62 54 or 55 or 56 or 57 or 58 or 59 or 60 or 61  
12 63 (exp "arctic and antarctic"/ or exp oceanic regions/ or exp western hemisphere/ or  
13 exp africa/ or exp asia/ or exp "australia and new zealand"/) not (exp united kingdom/ or  
14 europe/)  
15 64 62 not 63 [NICE UK Filter]  
16 65 letter.pt.  
17 66 (animal\* not human\*).sh,hw.  
18 67 65 or 66 [excluding animals and unwanted publication types]  
19 68 3 and 24 and 48  
20 69 3 and 24 and 53  
21 70 68 or 69  
22 71 64 and 70  
23 72 71 not 67  
24 73 limit 72 to conference abstract status  
25 74 limit 73 to dd=20200831-20210831  
26 75 72 not 73  
27 76 74 or 75  
28  
29  
30  
31  
32  
33  
34  
35  
36  
37  
38  
39  
40  
41  
42  
43  
44  
45  
46  
47  
48  
49  
50  
51  
52  
53  
54  
55  
56  
57  
58  
59  
60

### Appendix S3.3: Search Strategies – PsycINFO (OVID)

#### OVID APA Psycinfo <1806 to August Week 4 2021>

1 ((colon\* or colorectal or rectal) adj3 (cancer\* or neoplas\* or tumor\* or tumour\* or  
 2 malignan\* or carcinoma\* or metasta\* or oncolog\*)).af. [cancer population of interest]  
 3 exp Socioeconomic Factors/  
 4 (socio-economic or socioeconomic or socio-demographic or sociodemographic).af.  
 5 exp Education/  
 6 exp Income Level/ or exp "Income (Economic)"/  
 7 exp Health Status/  
 8 exp Poverty/  
 9 (socio-economic position or socioeconomic position).af.  
 10 inequalities.af.  
 11 exp Social Environments/  
 12 social factors.af.  
 13 income.af.  
 14 exp Neighborhoods/ or exp Urban Environments/ or exp Housing/  
 15 social class.af.  
 16 education.af.  
 17 exp Health Disparities/  
 18 depriv\*.af.  
 19 (equity or equitable).af.  
 20 (inequity or inequitable).af.  
 21 inequities.af.  
 22 disparit\*.af.  
 23 2 or 3 or 4 or 5 or 6 or 7 or 8 or 9 or 10 or 11 or 12 or 13 or 14 or 15 or 16 or 17 or 18  
 24 or 19 or 20 or 21 [inequality concept]  
 25 surgery.af.  
 26 Treatment.af.  
 27 exp Health Care Utilization/ or exp Health Care Delivery/ or exp Health Care Access/  
 28 or exp Treatment Barriers/  
 29 treatment disparities.af.  
 30 exp Health Care Services/  
 31 exp Primary Health Care/  
 32 exp Drug Therapy/  
 33 chemotherapy.af.  
 34 exp Radiation Therapy/  
 35 exp Chemotherapy/  
 36 radiotherapy.af.  
 37 accessibility.af.  
 38 access.af.  
 39 pattern\$.af.  
 40 exp Palliative Care/  
 care.af.  
 investigation.af.  
 exp "Quality of Care"/ or exp "Quality of Services"/

1  
 2  
 3 41 exp Patient Selection/  
 4 42 exp Decision Making/  
 5 43 receipt.af.  
 6 44 provision.af.  
 7 45 attendance.af.  
 8  
 9 46 23 or 24 or 25 or 26 or 27 or 28 or 29 or 30 or 31 or 32 or 33 or 34 or 35 or 36 or 37  
 10 or 38 or 39 or 40 or 41 or 42 or 43 or 44 or 45 [treatment concept]  
 11 47 ((patient\* or present\* or doctor\* or physician\* or practitioner\* or hospital\* or  
 12 system\* or (primary adj care) or (secondary adj care) or total or (help adj3 seek) or pre-  
 13 treatment\* or referr\* or specialist\* or consultant\* or surg\* or chemothera\* or radiothera\*  
 14 or treatment\* or diagnos\*) adj5 (delay\* or interval\* or time\* or pathway\* or route\*).ti,ab.  
 15 48 (stage\* adj5 (diagnosis or diagnostic)).ti,ab.  
 16 49 47 or 48 [interval concept]  
 17 50 (national health service\* or NHS\*).ti,ab,in.  
 18 51 (english not ((published or publication\* or translat\* or written or language\* or  
 19 speak\* or literature or citation\*) adj5 english)).ti,ab.  
 20 52 (gb or "g.b." or britain\* or (british\* not "british columbia") or uk or "u.k." or united  
 21 kingdom\* or (england\* not "new england") or northern ireland\* or northern irish\* or  
 22 scotland\* or scottish\* or ((wales or "south wales") not "new south wales") or  
 23 welsh\*).ti,ab,jx,in.  
 24 53 (bath or "bath's" or ((birmingham not alabama\*) or ("birmingham's" not alabama\*)  
 25 or bradford or "bradford's" or brighton or "brighton's" or bristol or "bristol's" or carlisle\* or  
 26 "carlisle's" or (cambridge not (massachusetts\* or boston\* or harvard\*)) or ("cambridge's"  
 27 not (massachusetts\* or boston\* or harvard\*)) or (canterbury not zealand\*) or  
 28 ("canterbury's" not zealand\*) or chelmsford or "chelmsford's" or chester or "chester's" or  
 29 chichester or "chichester's" or coventry or "coventry's" or derby or "derby's" or (durham not  
 30 (carolina\* or nc)) or ("durham's" not (carolina\* or nc)) or ely or "ely's" or exeter or  
 31 "exeter's" or gloucester or "gloucester's" or hereford or "hereford's" or hull or "hull's" or  
 32 lancaster or "lancaster's" or leeds\* or leicester or "leicester's" or (lincoln not nebraska\*) or  
 33 ("lincoln's" not nebraska\*) or (liverpool not (new south wales\* or nsw)) or ("liverpool's" not  
 34 (new south wales\* or nsw)) or ((london not (ontario\* or ont or toronto\*)) or ("london's" not  
 35 (ontario\* or ont or toronto\*)) or manchester or "manchester's" or (newcastle not (new  
 36 south wales\* or nsw)) or ("newcastle's" not (new south wales\* or nsw)) or norwich or  
 37 "norwich's" or nottingham or "nottingham's" or oxford or "oxford's" or peterborough or  
 38 "peterborough's" or plymouth or "plymouth's" or portsmouth or "portsmouth's" or preston  
 39 or "preston's" or ripon or "ripon's" or salford or "salford's" or salisbury or "salisbury's" or  
 40 sheffield or "sheffield's" or southampton or "southampton's" or st albans or stoke or  
 41 "stoke's" or sunderland or "sunderland's" or truro or "truro's" or wakefield or "wakefield's"  
 42 or wells or westminster or "westminster's" or winchester or "winchester's" or  
 43 wolverhampton or "wolverhampton's" or (worcester not (massachusetts\* or boston\* or  
 44 harvard\*)) or ("worcester's" not (massachusetts\* or boston\* or harvard\*)) or (york not  
 45 ("new york\*" or ny or ontario\* or ont or toronto\*)) or ("york's" not ("new york\*" or ny or  
 46 ontario\* or ont or toronto\*))))).ti,ab,in.  
 47 54 (bangor or "bangor's" or cardiff or "cardiff's" or newport or "newport's" or st asaph  
 48 or "st asaph's" or st davids or swansea or "swansea's").ti,ab,in.  
 49  
 50  
 51  
 52  
 53  
 54  
 55  
 56  
 57  
 58  
 59  
 60

1  
2  
3 55 (aberdeen or "aberdeen's" or dundee or "dundee's" or edinburgh or "edinburgh's"  
4 or glasgow or "glasgow's" or inverness or (perth not australia\*) or ("perth's" not australia\*)  
5 or stirling or "stirling's").ti,ab,in.

6  
7 56 (armagh or "armagh's" or belfast or "belfast's" or lisburn or "lisburn's" or  
8 londonderry or "londonderry's" or derry or "derry's" or newry or "newry's").ti,ab,in.

9 57 50 or 51 or 52 or 53 or 54 or 55 or 56 [UK filter]

10 58 exp animals/ not humans.sh. [excluding animals]

11 59 1 and 22 and 46

12 60 1 and 22 and 49

13 61 59 or 60

14 62 57 and 61

15 63 62 not 58

16  
17  
18  
19  
20  
21  
22  
23  
24  
25  
26  
27  
28  
29  
30  
31  
32  
33  
34  
35  
36  
37  
38  
39  
40  
41  
42  
43  
44  
45  
46  
47  
48  
49  
50  
51  
52  
53  
54  
55  
56  
57  
58  
59  
60

For peer review only

## Appendix S3.4: Search Strategies – AMED (OVID)

### AMED (Allied and Complementary Medicine) <1985 to August 2021>

1 exp Colorectal neoplasms/  
 2 ((colon\* or colorectal or rectal) adj3 (cancer\* or neoplas\* or tumor\* or tumour\* or  
 3 malignan\* or carcinoma\* or metasta\* or oncolog\*)).mp.  
 4 1 or 2  
 5 exp Socioeconomic factors/  
 6 (socio-economic or socioeconomic or socio-demographic or sociodemographic).mp.  
 7 exp education/  
 8 exp Income/  
 9 exp Health status/  
 10 exp Poverty/  
 11 (socio-economic position or socioeconomic position).mp.  
 12 inequalities.mp.  
 13 exp Social environment/  
 14 social factors.mp.  
 15 income.mp.  
 16 exp Residence characteristics/  
 17 Social class.mp.  
 18 Education.mp.  
 19 depriv\*.mp.  
 20 (equity or equitable).mp.  
 21 (inequity or inequitable).mp.  
 22 inequities.mp.  
 23 disparit\*.mp.  
 24 4 or 5 or 6 or 7 or 8 or 9 or 10 or 11 or 12 or 13 or 14 or 15 or 16 or 17 or 18 or 19 or  
 25 20 or 21 or 22  
 26 surgery.mp.  
 27 Treatment.mp.  
 28 exp Health services accessibility/  
 29 treatment disparities.mp.  
 30 exp "Delivery of health care"/  
 31 exp Primary health care/  
 32 exp Drug therapy/  
 33 chemotherapy.mp.  
 34 exp Radiotherapy/  
 35 radiotherapy.mp.  
 36 accessibility.mp.  
 37 access.mp.  
 38 pattern\$.mp.  
 39 exp palliative care/  
 40 exp Patient care/  
 41 care.mp.  
 42 investigation.mp.  
 43 exp "Quality of health care"/



1  
2  
3 42 exp Patient assessment/  
4 43 exp "Referral and consultation"/  
5 44 exp "Patient acceptance of health care"/  
6 receipt.mp.  
7 45  
8 46 Provision.mp.  
9 47 Attendance.mp.  
10 48 24 or 25 or 26 or 27 or 28 or 29 or 30 or 31 or 32 or 33 or 34 or 35 or 36 or 37 or 38  
11 or 39 or 40 or 41 or 42 or 43 or 44 or 45 or 46 or 47  
12 49 ((patient\* or present\* or doctor\* or physician\* or practitioner\* or hospital\* or  
13 system\* or (primary adj care) or (secondary adj care) or total or (help adj3 seek) or pre-  
14 treatment\* or referr\* or specialist\* or consultant\* or surg\* or chemothera\* or radiothera\*  
15 or treatment\* or diagnos\*) adj5 (delay\* or interval\* or time\* or pathway\* or route\*).ti,ab.  
16 50 (stage\* adj5 (diagnosis or diagnostic)).ti,ab.  
17 51 49 or 50  
18 52 3 and 23 and 48  
19 53 3 and 23 and 51  
20 54 52 or 53  
21  
22  
23  
24  
25  
26  
27  
28  
29  
30  
31  
32  
33  
34  
35  
36  
37  
38  
39  
40  
41  
42  
43  
44  
45  
46  
47  
48  
49  
50  
51  
52  
53  
54  
55  
56  
57  
58  
59  
60

## Appendix S3.5: Search Strategies – HMIC (OVID)

### HMIC Health Management Information Consortium <1979 to August 2021>

1 exp Colorectal cancer/  
 2 ((colon\* or colorectal or rectal) adj3 (cancer\* or neoplas\* or tumor\* or tumour\* or  
 3 malignan\* or carcinoma\* or metasta\* or oncolog\*)).af..  
 4 1 or 2  
 5 exp Socioeconomic factors/  
 6 (socio-economic or socioeconomic or socio-demographic or sociodemographic).af.  
 7 exp education/  
 8 exp Income/  
 9 exp health status/  
 10 exp Poverty/  
 11 (socio-economic position or socioeconomic position).af.  
 12 inequalities.af.  
 13 exp Social conditions/  
 14 social factors.af.  
 15 income.af.  
 16 social class.af.  
 17 education.af.  
 18 exp Health inequalities/  
 19 depriv\*.af.  
 20 (equity or equitable).af.  
 21 (inequity or inequitable).af.  
 22 inequities.af.  
 23 disparit\*.af.  
 24 4 or 5 or 6 or 7 or 8 or 9 or 10 or 11 or 12 or 13 or 14 or 15 or 16 or 17 or 18 or 19 or  
 25 20 or 21 or 22  
 26 surgery.af.  
 27 treatment.af.  
 28 exp Access to health services/  
 29 treatment disparities.af.  
 30 exp Service delivery/  
 31 exp primary care/  
 32 exp Drug therapy/  
 33 chemotherapy.af.  
 34 exp Radiotherapy/  
 35 radiotherapy.af.  
 36 accessibility.af.  
 37 access.af.  
 38 pattern\*.af.  
 39 exp Palliative care/  
 40 exp patient care/  
 41 care.af.  
 42 investigation.af.  
 43 exp "Quality of patient care"/

1  
2  
3 42 exp Patient selection/  
4 43 exp Patient eligibility/  
5 44 exp Patient referral/  
6 45 receipt.af.  
7 46 provision.af.  
8 47 attendance.af.  
9  
10 48 24 or 25 or 26 or 27 or 28 or 29 or 30 or 31 or 32 or 33 or 34 or 35 or 36 or 37 or 38  
11 or 39 or 40 or 41 or 42 or 43 or 44 or 45 or 46 or 47  
12  
13 49 exp Early diagnosis/  
14 50 exp Patient waiting time/  
15 51 ((patient\* or present\* or doctor\* or physician\* or practitioner\* or hospital\* or  
16 system\* or (primary adj care) or (secondary adj care) or total or (help adj3 seek) or pre-  
17 treatment\* or referr\* or specialist\* or consultant\* or surg\* or chemothera\* or radiothera\*  
18 or treatment\* or diagnos\*) adj5 (delay\* or interval\* or time\* or pathway\* or route\*)).mp.  
19  
20 52 (stage\* adj5 (diagnosis or diagnostic)).ti,ab.  
21  
22 53 49 or 50 or 51 or 52  
23 54 3 and 23 and 48  
24 55 3 and 23 and 53  
25 56 54 or 55  
26  
27  
28  
29  
30  
31  
32  
33  
34  
35  
36  
37  
38  
39  
40  
41  
42  
43  
44  
45  
46  
47  
48  
49  
50  
51  
52  
53  
54  
55  
56  
57  
58  
59  
60

## Appendix S3.6: Search Strategies – CENTRAL (The Cochrane Library)

**Search Name: CENTRAL Search**

**Last Saved: 01/09/2021 17:45:46**

| ID  | Search                                                                                                                                           |
|-----|--------------------------------------------------------------------------------------------------------------------------------------------------|
| #1  | MeSH descriptor: [Colorectal Neoplasms] explode all trees                                                                                        |
| #2  | ((colon* or colorectal or rectal) NEAR/3 (cancer* or neoplas* or tumor* or tumour* or malignan* or carcinoma* or metasta* or oncolog*)):ti,ab,kw |
| #3  | #1 or #2                                                                                                                                         |
| #4  | MeSH descriptor: [Socioeconomic Factors] explode all trees                                                                                       |
| #5  | ((socio-economic or socioeconomic or socio-demographic or sociodemographic)):ti,ab,kw                                                            |
| #6  | MeSH descriptor: [Education] explode all trees                                                                                                   |
| #7  | MeSH descriptor: [Income] explode all trees                                                                                                      |
| #8  | MeSH descriptor: [Health Status] explode all trees                                                                                               |
| #9  | MeSH descriptor: [Poverty] explode all trees                                                                                                     |
| #10 | ((socio-economic position or socioeconomic position)):ti,ab,kw                                                                                   |
| #11 | (inequalities):ti,ab,kw                                                                                                                          |
| #12 | MeSH descriptor: [Social Environment] explode all trees                                                                                          |
| #13 | (social factors):ti,ab,kw                                                                                                                        |
| #14 | (income):ti,ab,kw                                                                                                                                |
| #15 | MeSH descriptor: [Residence Characteristics] explode all trees                                                                                   |
| #16 | (Social class):ti,ab,kw                                                                                                                          |
| #17 | (education):ti,ab,kw                                                                                                                             |
| #18 | MeSH descriptor: [Health Status Disparities] explode all trees                                                                                   |
| #19 | (Depriv*):ti,ab,kw                                                                                                                               |
| #20 | ((equity or equitable)):ti,ab,kw                                                                                                                 |
| #21 | ((inequity or inequitable)):ti,ab,kw                                                                                                             |
| #22 | (inequities):ti,ab,kw                                                                                                                            |
| #23 | (disparit*):ti,ab,kw                                                                                                                             |
| #24 | #4 or #5 or #6 or #7 or #8 or #9 or #10 or #11 or #12 or #13 or #14 or #15 or #16 or #17 or #18 or #19 or #20 or #21 or #22 or #23               |
| #25 | (surgery):ti,ab,kw                                                                                                                               |
| #26 | (treatment):ti,ab,kw                                                                                                                             |
| #27 | MeSH descriptor: [Health Services Accessibility] explode all trees                                                                               |
| #28 | MeSH descriptor: [Healthcare Disparities] explode all trees                                                                                      |
| #29 | (treatment disparities):ti,ab,kw                                                                                                                 |
| #30 | MeSH descriptor: [Delivery of Health Care] explode all trees                                                                                     |
| #31 | MeSH descriptor: [Primary Health Care] explode all trees                                                                                         |
| #32 | MeSH descriptor: [Drug Therapy] explode all trees                                                                                                |
| #33 | (chemotherapy):ti,ab,kw                                                                                                                          |
| #34 | MeSH descriptor: [Radiotherapy] explode all trees                                                                                                |
| #35 | (radiotherapy):ti,ab,kw                                                                                                                          |
| #36 | (accessibility):ti,ab,kw                                                                                                                         |
| #37 | (access):ti,ab,kw                                                                                                                                |
| #38 | (pattern*):ti,ab,kw                                                                                                                              |

- 1  
2  
3 #49 MeSH descriptor: [Patient Care] explode all trees  
4 #40 MeSH descriptor: [Palliative Care] explode all trees  
5 #41 MeSH descriptor: [Primary Health Care] explode all trees  
6 #42 (care or investigation):ti,ab,kw  
7 #43 MeSH descriptor: [Quality of Health Care] explode all trees  
8 #44 MeSH descriptor: [Patient Selection] explode all trees  
9 #45 MeSH descriptor: [Eligibility Determination] explode all trees  
10 #46 MeSH descriptor: [Referral and Consultation] explode all trees  
11 #47 MeSH descriptor: [Patient Acceptance of Health Care] explode all trees  
12 #48 (receipt or provision or attendance):ti,ab,kw  
13 #49 #25 or #26 or #27 or #28 or #29 or #30 or #31 or #32 or #33 or #34 or #35 or #36 or  
14 #37 or #38 or #39 or #40 or #41 or #42 or #43 or #44 or #45 or #46 or #47 or #48  
15 #50 MeSH descriptor: [Early Detection of Cancer] explode all trees  
16 #51 MeSH descriptor: [Delayed Diagnosis] explode all trees  
17 #52 (((patient\* or present\* or doctor\* or physician\* or practitioner\* or hospital\* or  
18 system\* or (primary NEAR/1 care) or (secondary NEAR/1 care) or total or (help NEAR/3  
19 seek) or pre-treatment\* or referr\* or specialist\* or consultant\* or surg\* or chemothera\* or  
20 radiothera\* or treatment\* or diagnos\*) NEAR/5 (delay\* or interval\* or time\* or pathway\*  
21 or route\*)))):ti,ab,kw  
22 #53 ((stage\* NEAR/5 (diagnosis or diagnostic))):ti,ab,kw  
23 #54 #50 or #51 or #52 or #53  
24 #55 MeSH descriptor: [United Kingdom] explode all trees  
25 #56 ((national health service\* or NHS\*)):ti,ab,kw  
26 #57 ((english not ((published or publication\* or translat\* or written or language\* or  
27 speak\* or literature or citation\*) NEAR/5 english))):ti,ab,kw  
28 #58 ((gb or "g.b." or britain\* or (british\* not "british columbia") or uk or "u.k." or united  
29 kingdom\* or (england\* not "new england") or northern ireland\* or northern irish\* or  
30 scotland\* or scottish\* or ((wales or "south wales") not "new south wales") or  
31 welsh\*)):ti,ab,kw  
32 #59 ((bath or "bath's" or ((birmingham not alabama\*) or ("birmingham's" not alabama\*)  
33 or bradford or "bradford's" or brighton or "brighton's" or bristol or "bristol's" or carlisle\* or  
34 "carlisle's" or (cambridge not (massachusetts\* or boston\* or harvard\*)) or ("cambridge's"  
35 not (massachusetts\* or boston\* or harvard\*)) or (canterbury not zealand\*) or  
36 ("canterbury's" not zealand\*) or chelmsford or "chelmsford's" or chester or "chester's" or  
37 chichester or "chichester's" or coventry or "coventry's" or derby or "derby's" or (durham not  
38 (carolina\* or nc)) or ("durham's" not (carolina\* or nc)) or ely or "ely's" or exeter or  
39 "exeter's" or gloucester or "gloucester's" or hereford or "hereford's" or hull or "hull's" or  
40 lancaster or "lancaster's" or leeds\* or leicester or "leicester's" or (lincoln not nebraska\*) or  
41 ("lincoln's" not nebraska\*) or (liverpool not (new south wales\* or nsw)) or ("liverpool's" not  
42 (new south wales\* or nsw)) or ((london not (ontario\* or ont or toronto\*)) or ("london's" not  
43 (ontario\* or ont or toronto\*)) or manchester or "manchester's" or (newcastle not (new  
44 south wales\* or nsw)) or ("newcastle's" not (new south wales\* or nsw)) or norwich or  
45 "norwich's" or nottingham or "nottingham's" or oxford or "oxford's" or peterborough or  
46 "peterborough's" or plymouth or "plymouth's" or portsmouth or "portsmouth's" or preston  
47 or "preston's" or ripon or "ripon's" or salford or "salford's" or salisbury or "salisbury's" or  
48 sheffield or "sheffield's" or southampton or "southampton's" or st albans or stoke or  
49 "stoke's" or sunderland or "sunderland's" or truro or "truro's" or wakefield or "wakefield's"

1  
2  
3 or wells or westminster or "westminster's" or winchester or "winchester's" or  
4 wolverhampton or "wolverhampton's" or (worcester not (massachusetts\* or boston\* or  
5 harvard\*)) or ("worcester's" not (massachusetts\* or boston\* or harvard\*)) or (york not  
6 ("new york\*" or ny or ontario\* or ont or toronto\*)) or ("york's" not ("new york\*" or ny or  
7 ontario\* or ont or toronto\*))))):ti,ab,kw  
8  
9 #60 ((bangor or "bangor's" or cardiff or "cardiff's" or newport or "newport's" or st asaph  
10 or "st asaph's" or st davids or swansea or "swansea's")):ti,ab,kw  
11  
12 #61 ((aberdeen or "aberdeen's" or dundee or "dundee's" or edinburgh or "edinburgh's"  
13 or glasgow or "glasgow's" or inverness or (perth not australia\*) or ("perth's" not australia\*)  
14 or stirling or "stirling's")):ti,ab,kw  
15  
16 #62 ((armagh or "armagh's" or belfast or "belfast's" or lisburn or "lisburn's" or  
17 londonderry or "londonderry's" or derry or "derry's" or newry or "newry's")):ti,ab,kw  
18  
19 #63 #55 or #56 or #57 or #58 or #59 or #60 or #61 or #62  
20 #64 MeSH descriptor: [Africa] explode all trees  
21 #65 MeSH descriptor: [Americas] explode all trees  
22 #66 MeSH descriptor: [Antarctic Regions] explode all trees  
23 #67 MeSH descriptor: [Arctic Regions] explode all trees  
24 #68 MeSH descriptor: [Asia] explode all trees  
25 #69 MeSH descriptor: [Oceania] explode all trees  
26 #70 MeSH descriptor: [United Kingdom] explode all trees  
27 #71 MeSH descriptor: [Europe] explode all trees  
28 #72 #64 or #65 or #66 or #67 or #68 or #69  
29 #73 #70 or #71  
30 #74 #72 NOT #73  
31 #75 #63 NOT #74  
32 #76 #3 and #24 and #49  
33 #77 #3 and #24 and #54  
34 #78 #76 or #77  
35 #79 #78 and #75  
36  
37  
38  
39  
40  
41  
42  
43  
44  
45  
46  
47  
48  
49  
50  
51  
52  
53  
54  
55  
56  
57  
58  
59  
60

## Appendix S3.7: Search Strategies – Science Citation Index Expanded

### Science Citation Index Expanded via Web Of Science Core Collection 01/9/21.

18

#9 AND #17

17

#10 OR #11 OR #12 OR #13 OR #14 OR #15 OR #16

16

(TI=(armagh or "armagh's" or belfast or "belfast's" or lisburn or "lisburn's" or londonderry or "londonderry's" or derry or "derry's" or newry or "newry's")) OR (AB=(armagh or "armagh's" or belfast or "belfast's" or lisburn or "lisburn's" or londonderry or "londonderry's" or derry or "derry's" or newry or "newry's")) OR (AD=(armagh or "armagh's" or belfast or "belfast's" or lisburn or "lisburn's" or londonderry or "londonderry's" or derry or "derry's" or newry or "newry's"))

15

(TI=(aberdeen or "aberdeen's" or dundee or "dundee's" or edinburgh or "edinburgh's" or glasgow or "glasgow's" or inverness or (perth not australia\*) or ("perth's" not australia\*) or stirling or "stirling's")) OR (AB=(aberdeen or "aberdeen's" or dundee or "dundee's" or edinburgh or "edinburgh's" or glasgow or "glasgow's" or inverness or (perth not australia\*) or ("perth's" not australia\*) or stirling or "stirling's")) OR (AD=(aberdeen or "aberdeen's" or dundee or "dundee's" or edinburgh or "edinburgh's" or glasgow or "glasgow's" or inverness or (perth not australia\*) or ("perth's" not australia\*) or stirling or "stirling's"))

14

(TI=(bangor or "bangor's" or cardiff or "cardiff's" or newport or "newport's" or st asaph or "st asaph's" or st davids or swansea or "swansea's")) OR (AB=(bangor or "bangor's" or cardiff or "cardiff's" or newport or "newport's" or st asaph or "st asaph's" or st davids or swansea or "swansea's")) OR (AD=(bangor or "bangor's" or cardiff or "cardiff's" or newport or "newport's" or st asaph or "st asaph's" or st davids or swansea or "swansea's"))

13

(TI=(bath or "bath's" or ((birmingham not alabama\*) or ("birmingham's" not alabama\*) or bradford or "bradford's" or brighton or "brighton's" or bristol or "bristol's" or carlisle\* or "carlisle's" or (cambridge not (massachusetts\* or boston\* or harvard\*)) or ("cambridge's" not (massachusetts\* or boston\* or harvard\*)) or (canterbury not zealand\*) or ("canterbury's" not zealand\*) or chelmsford or "chelmsford's" or chester or "chester's" or chichester or "chichester's" or coventry or "coventry's" or derby or "derby's" or (durham not (carolina\* or nc)) or ("durham's" not (carolina\* or nc)) or ely or "ely's" or exeter or "exeter's" or gloucester or "gloucester's" or hereford or "hereford's" or hull or "hull's" or lancaster or "lancaster's" or leeds\* or leicester or "leicester's" or (lincoln not nebraska\*) or ("lincoln's" not nebraska\*) or (liverpool not (new south wales\* or nsw)) or ("liverpool's" not (new south wales\* or nsw)) or ((london not (ontario\* or ont or toronto\*)) or ("london's" not (ontario\* or ont or toronto\*)) or manchester or "manchester's" or (newcastle not (new south wales\* or nsw)) or ("newcastle's" not (new south wales\* or nsw)) or norwich or "norwich's" or nottingham or "nottingham's" or oxford or "oxford's" or peterborough or "peterborough's" or plymouth or "plymouth's" or portsmouth or "portsmouth's" or preston or "preston's" or ripon or "ripon's" or salford or "salford's" or salisbury or

1  
2  
3 "salisbury's" or sheffield or "sheffield's" or southampton or "southampton's" or st  
4 albans or stoke or "stoke's" or sunderland or "sunderland's" or truro or "truro's" or  
5 wakefield or "wakefield's" or wells or westminster or "westminster's" or winchester or  
6 "winchester's" or wolverhampton or "wolverhampton's" or (worchester not  
7 (massachusetts\* or boston\* or harvard\*)) or ("worchester's" not (massachusetts\* or  
8 boston\* or harvard\*)) or (york not ("new york\*" or ny or ontario\* or ont or toronto\*))  
9 or ("york's" not ("new york\*" or ny or ontario\* or ont or toronto\*)))) OR (AB=(bath or  
10 "bath's" or ((birmingham not alabama\*) or ("birmingham's" not alabama\*) or bradford  
11 or "bradford's" or brighton or "brighton's" or bristol or "bristol's" or carlisle\* or  
12 "carlisle's" or (cambridge not (massachusetts\* or boston\* or harvard\*)) or  
13 ("cambridge's" not (massachusetts\* or boston\* or harvard\*)) or (canterbury not  
14 zealand\*) or ("canterbury's" not zealand\*) or chelmsford or "chelmsford's" or chester  
15 or "chester's" or chichester or "chichester's" or coventry or "coventry's" or derby or  
16 "derby's" or (durham not (carolina\* or nc)) or ("durham's" not (carolina\* or nc)) or ely  
17 or "ely's" or exeter or "exeter's" or gloucester or "gloucester's" or hereford or  
18 "hereford's" or hull or "hull's" or lancaster or "lancaster's" or leeds\* or leicester or  
19 "leicester's" or (lincoln not nebraska\*) or ("lincoln's" not nebraska\*) or (liverpool not  
20 (new south wales\* or nsw)) or ("liverpool's" not (new south wales\* or nsw)) or  
21 ((london not (ontario\* or ont or toronto\*)) or ("london's" not (ontario\* or ont or  
22 toronto\*)) or manchester or "manchester's" or (newcastle not (new south wales\* or  
23 nsw)) or ("newcastle's" not (new south wales\* or nsw)) or norwich or "norwich's" or  
24 nottingham or "nottingham's" or oxford or "oxford's" or peterborough or  
25 "peterborough's" or plymouth or "plymouth's" or portsmouth or "portsmouth's" or  
26 preston or "preston's" or ripon or "ripon's" or salford or "salford's" or salisbury or  
27 "salisbury's" or sheffield or "sheffield's" or southampton or "southampton's" or st  
28 albans or stoke or "stoke's" or sunderland or "sunderland's" or truro or "truro's" or  
29 wakefield or "wakefield's" or wells or westminster or "westminster's" or winchester or  
30 "winchester's" or wolverhampton or "wolverhampton's" or (worchester not  
31 (massachusetts\* or boston\* or harvard\*)) or ("worchester's" not (massachusetts\* or  
32 boston\* or harvard\*)) or (york not ("new york\*" or ny or ontario\* or ont or toronto\*))  
33 or ("york's" not ("new york\*" or ny or ontario\* or ont or toronto\*)))) OR (AD=(bath or  
34 "bath's" or ((birmingham not alabama\*) or ("birmingham's" not alabama\*) or bradford  
35 or "bradford's" or brighton or "brighton's" or bristol or "bristol's" or carlisle\* or  
36 "carlisle's" or (cambridge not (massachusetts\* or boston\* or harvard\*)) or  
37 ("cambridge's" not (massachusetts\* or boston\* or harvard\*)) or (canterbury not  
38 zealand\*) or ("canterbury's" not zealand\*) or chelmsford or "chelmsford's" or chester  
39 or "chester's" or chichester or "chichester's" or coventry or "coventry's" or derby or  
40 "derby's" or (durham not (carolina\* or nc)) or ("durham's" not (carolina\* or nc)) or ely  
41 or "ely's" or exeter or "exeter's" or gloucester or "gloucester's" or hereford or  
42 "hereford's" or hull or "hull's" or lancaster or "lancaster's" or leeds\* or leicester or  
43 "leicester's" or (lincoln not nebraska\*) or ("lincoln's" not nebraska\*) or (liverpool not  
44 (new south wales\* or nsw)) or ("liverpool's" not (new south wales\* or nsw)) or  
45 ((london not (ontario\* or ont or toronto\*)) or ("london's" not (ontario\* or ont or  
46 toronto\*)) or manchester or "manchester's" or (newcastle not (new south wales\* or  
47 nsw)) or ("newcastle's" not (new south wales\* or nsw)) or norwich or "norwich's" or  
48 nottingham or "nottingham's" or oxford or "oxford's" or peterborough or  
49 "peterborough's" or plymouth or "plymouth's" or portsmouth or "portsmouth's" or  
50 preston or "preston's" or ripon or "ripon's" or salford or "salford's" or salisbury or  
51 "salisbury's" or sheffield or "sheffield's" or southampton or "southampton's" or st  
52  
53  
54  
55  
56  
57  
58  
59  
60



1  
2  
3 albens or stoke or "stoke's" or sunderland or "sunderland's" or truro or "truro's" or  
4 wakefield or "wakefield's" or wells or westminster or "westminster's" or winchester or  
5 "winchester's" or wolverhampton or "wolverhampton's" or (worcester not  
6 (massachusetts\* or boston\* or harvard\*)) or ("worcester's" not (massachusetts\* or  
7 boston\* or harvard\*)) or (york not ("new york\*" or ny or ontario\* or ont or toronto\*))  
8 or ("york's" not ("new york\*" or ny or ontario\* or ont or toronto\*))))))

9  
10 12

11 (TI=(gb or "g.b." or britain\* or (british\* not "british columbia") or uk or "u.k." or united  
12 kingdom\* or (england\* not "new england") or northern ireland\* or northern irish\* or  
13 scotland\* or scottish\* or ((wales or "south wales") not "new south wales") or welsh\*))  
14 OR (AB=(gb or "g.b." or britain\* or (british\* not "british columbia") or uk or "u.k." or  
15 united kingdom\* or (england\* not "new england") or northern ireland\* or northern  
16 irish\* or scotland\* or scottish\* or ((wales or "south wales") not "new south wales") or  
17 welsh\*)) OR (AD=(gb or "g.b." or britain\* or (british\* not "british columbia") or uk or  
18 "u.k." or united kingdom\* or (england\* not "new england") or northern ireland\* or  
19 northern irish\* or scotland\* or scottish\* or ((wales or "south wales") not "new south  
20 wales") or welsh\*))

21  
22 11

23 (TI=(english not ((published or publication\* or translat\* or written or language\* or  
24 speak\* or literature or citation\*) near/5 english))) OR (AB=(english not ((published or  
25 publication\* or translat\* or written or language\* or speak\* or literature or citation\*)  
26 near/5 english)))

27  
28 10

29 ((TI=((national health service\* or NHS\*)) OR AB=((national health service\* or NHS\*))  
30 OR AD=((national health service\* or NHS\*))

31  
32 9

33 #7 OR #8

34  
35 8

36 #1 AND #2 AND #6

37  
38 7

39 #1 AND #2 AND #3

40  
41 6

42 #4 or #5

43  
44 5

45 TS=(stage\* near/5 (diagnosis or diagnostic))

46  
47 4

48 TS=((patient\* or present\* or doctor\* or physician\* or practitioner\* or hospital\* or  
49 system\* or (primary near/1 care) or (secondary near/1 care) or total or (help near/3  
50 seek) or pre-treatment\* or referr\* or specialist\* or consultant\* or surg\* or chemothera\*  
51 or radiothera\* or treatment\* or diagnos\*) near/5 (delay\* or interval\* or time\* or  
52 pathway\* or route\*))

53  
54 3

55 TS=(surgery or treatment or "treatment disparities" or chemotherapy or radiotherapy  
56 or accessibility or access or pattern\* or care or investigation or receipt or provision or  
57 attendance)

58  
59 2

60 TS=(socio-economic or socioeconomic or socio-demographic or sociodemographic or  
"socio-economic position" or "socioeconomic position" or inequalities or "social factors"

1  
2  
3 or income or "social class" or education or depriv\* or equity or equitable or inequity or  
4 inequitable or inequities or disparit\*)

5  
6 1  
7 (TS=(((colon\* or colorectal or rectal) near/3 (cancer\* or neoplas\* or tumor\* or tumour\*  
8 or malignan\* or carcinoma\* or metasta\* or oncolog\*))))  
9  
10  
11  
12  
13  
14  
15  
16  
17  
18  
19  
20  
21  
22  
23  
24  
25  
26  
27  
28  
29  
30  
31  
32  
33  
34  
35  
36  
37  
38  
39  
40  
41  
42  
43  
44  
45  
46  
47  
48  
49  
50  
51  
52  
53  
54  
55  
56  
57  
58  
59  
60

For peer review only

## Appendix S3.8: Search Strategies – CINAHL

### CINAHL Searched via EBSCO 31/8/21

| #   | Query                                                                                                                                                                                                                                                                            |
|-----|----------------------------------------------------------------------------------------------------------------------------------------------------------------------------------------------------------------------------------------------------------------------------------|
| S1  | (MH "Colorectal Neoplasms+")                                                                                                                                                                                                                                                     |
| S2  | TI ((colon* or colorectal or rectal) n3 (cancer* or neoplas* or tumor* or tumour* or malignan* or carcinoma* or metasta* or oncolog*)) or AB ((colon* or colorectal or rectal) n3 (cancer* or neoplas* or tumor* or tumour* or malignan* or carcinoma* or metasta* or oncolog*)) |
| S3  | S1 OR S2                                                                                                                                                                                                                                                                         |
| S4  | (MH "Socioeconomic Factors+")                                                                                                                                                                                                                                                    |
| S5  | TI (socio-economic or socioeconomic or socio-demographic or sociodemographic) or AB (socio-economic or socioeconomic or socio-demographic or sociodemographic)                                                                                                                   |
| S6  | (MH "Education+")                                                                                                                                                                                                                                                                |
| S7  | (MH "Income+")                                                                                                                                                                                                                                                                   |
| S8  | (MH "Health Status+")                                                                                                                                                                                                                                                            |
| S9  | (MH "Poverty+")                                                                                                                                                                                                                                                                  |
| S10 | TI (socio-economic position or socioeconomic position) or AB (socio-economic position or socioeconomic position)                                                                                                                                                                 |
| S11 | TI inequalities or AB inequalities                                                                                                                                                                                                                                               |
| S12 | (MH "Social Environment+")                                                                                                                                                                                                                                                       |
| S13 | TI (social factors) or AB (social factors)                                                                                                                                                                                                                                       |
| S14 | TI income or AB income                                                                                                                                                                                                                                                           |
| S15 | (MH "Residence Characteristics+")                                                                                                                                                                                                                                                |
| S16 | TI (social class) or AB (social class)                                                                                                                                                                                                                                           |
| S17 | TI education or AB education                                                                                                                                                                                                                                                     |
| S18 | (MH "Health Status Disparities")                                                                                                                                                                                                                                                 |
| S19 | TI (depriv*) or AB (depriv*)                                                                                                                                                                                                                                                     |
| S20 | TI (equity or equitable) or AB (equity or equitable)                                                                                                                                                                                                                             |
| S21 | TI (inequity or inequitable) or AB (inequity or inequitable)                                                                                                                                                                                                                     |
| S22 | TI inequities or AB inequities                                                                                                                                                                                                                                                   |
| S23 | TI disparit* or AB disparit*                                                                                                                                                                                                                                                     |
| S24 | (S4 OR S5 OR S6 OR S7 OR S8 OR S9 OR S10 OR S11 OR S12 OR S13 OR S14 OR S15 OR S16 OR S17 OR S18 OR S19 OR S20 OR S21 OR S22 OR S23)                                                                                                                                             |
| S25 | TI (surgery) or AB (surgery)                                                                                                                                                                                                                                                     |
| S26 | TI (treatment) or AB (treatment)                                                                                                                                                                                                                                                 |

|    |     |                                                                                                                      |
|----|-----|----------------------------------------------------------------------------------------------------------------------|
| 1  |     |                                                                                                                      |
| 2  |     |                                                                                                                      |
| 3  |     |                                                                                                                      |
| 4  | S27 | (MH "Health Services Accessibility+")                                                                                |
| 5  | S28 | (MH "Healthcare Disparities")                                                                                        |
| 6  |     |                                                                                                                      |
| 7  | S29 | TI (treatment disparities) or AB (treatment disparities)                                                             |
| 8  |     |                                                                                                                      |
| 9  | S30 | (MH "Health Care Delivery+")                                                                                         |
| 10 | S31 | (MH "Primary Health Care")                                                                                           |
| 11 |     |                                                                                                                      |
| 12 | S32 | (MH "Drug Therapy+")                                                                                                 |
| 13 |     |                                                                                                                      |
| 14 | S33 | TI (chemotherapy) or AB (chemotherapy)                                                                               |
| 15 | S34 | (MH "Radiotherapy, Adjuvant+") OR (MH "Radiotherapy+")                                                               |
| 16 |     |                                                                                                                      |
| 17 | S35 | TI (radiotherapy) or AB (radiotherapy)                                                                               |
| 18 |     |                                                                                                                      |
| 19 | S36 | TI (accessibility) or AB (accessibility)                                                                             |
| 20 |     |                                                                                                                      |
| 21 | S37 | TI (access) AB (access)                                                                                              |
| 22 | S38 | TI (pattern*) or AB (pattern*)                                                                                       |
| 23 |     |                                                                                                                      |
| 24 | S39 | (MH "Patient Care+") or (MH "Palliative Care")                                                                       |
| 25 |     |                                                                                                                      |
| 26 | S40 | TI (care) or AB (care)                                                                                               |
| 27 |     |                                                                                                                      |
| 28 | S41 | TI (investigation) or AB (investigation)                                                                             |
| 29 | S42 | (MH "Quality of Health Care+")                                                                                       |
| 30 |     |                                                                                                                      |
| 31 | S43 | (MH "Eligibility Determination") or (MH "Patient Selection")                                                         |
| 32 |     |                                                                                                                      |
| 33 | S44 | (MH "Referral and Consultation+")                                                                                    |
| 34 |     |                                                                                                                      |
| 35 | S45 | TI ("receipt") or ("patient acceptance of health care")) or AB ("receipt") or ("patient acceptance of health care")) |
| 36 |     |                                                                                                                      |
| 37 | S46 | TI (provision) or AB (provision)                                                                                     |
| 38 |     |                                                                                                                      |
| 39 | S47 | TI (attendance) or AB (attendance)                                                                                   |
| 40 |     |                                                                                                                      |
| 41 |     | S25 OR S26 OR S27 OR S28 OR S29 OR S30 OR S31 OR S32 OR S33 OR S34 OR                                                |
| 42 | S48 | S35 OR S36 OR S37 OR S38 OR S39 OR S40 OR S41 OR S42 OR S43 OR S44 OR                                                |
| 43 |     | S45 OR S46 OR S47                                                                                                    |
| 44 | S49 | (MH "Early Detection of Cancer")                                                                                     |
| 45 |     |                                                                                                                      |
| 46 | S50 | (MH "Early Diagnosis+")                                                                                              |
| 47 |     |                                                                                                                      |
| 48 |     | TI ( ((patient* or present* or doctor* or physician* or practitioner* or hospital* or                                |
| 49 |     | system* or (primary n1 care) or (secondary n1 care) or total or (help n1 seek) or pre-                               |
| 50 |     | treatment* or referr* or specialist* or consultant* or surg* or chemothera* or radiothera*                           |
| 51 |     | or treatment* or diagnos*) n5 (delay* or interval* or time* or pathway* or route*)) ) OR                             |
| 52 |     | AB ( ((patient* or present* or doctor* or physician* or practitioner* or hospital* or                                |
| 53 |     | system* or (primary n1 care) or (secondary n1 care) or total or (help n1 seek) or pre-                               |
| 54 | S51 | treatment* or referr* or specialist* or consultant* or surg* or chemothera* or radiothera*                           |
| 55 |     | or treatment* or diagnos*) n5 (delay* or interval* or time* or pathway* or route*)) )                                |
| 56 |     |                                                                                                                      |
| 57 | S52 | TI ( (stage* n5 (diagnosis or diagnostic)) ) OR AB ( (stage* n5 (diagnosis or                                        |
| 58 |     | diagnostic)) )                                                                                                       |
| 59 | S53 | S49 OR S50 OR S51 OR S52                                                                                             |
| 60 |     |                                                                                                                      |

- 1  
2  
3  
4 S54 (MH "Great Britain") OR (MH "United Kingdom+")
- 5  
6 S55 TI ( (national health service\* or NHS\*) ) OR AB ( (national health service\* or NHS\*) )  
7 OR AF ( (national health service\* or NHS\*) )
- 8  
9 S56 TI ( (english not ((published or publication\* or translat\* or written or language\* or  
10 speak\* or literature or citation\*) n5 english)) ) OR AB ( (english not ((published or  
11 publication\* or translat\* or written or language\* or speak\* or literature or citation\*) n5  
12 english)) )
- 13  
14 S57 TI ( (gb or "g.b." or britain\* or (british\* not "british columbia") or uk or "u.k." or united  
15 kingdom\* or (england\* not "new england") or northern ireland\* or northern irish\* or  
16 scotland\* or scottish\* or ((wales or "south wales") not "new south wales") or welsh\* )  
17 OR AB ( (gb or "g.b." or britain\* or (british\* not "british columbia") or uk or "u.k." or  
18 united kingdom\* or (england\* not "new england") or northern ireland\* or northern irish\*  
19 or scotland\* or scottish\* or ((wales or "south wales") not "new south wales") or welsh\* ) )  
20 OR AF ( (gb or "g.b." or britain\* or (british\* not "british columbia") or uk or "u.k." or  
21 united kingdom\* or (england\* not "new england") or northern ireland\* or northern irish\*  
22 or scotland\* or scottish\* or ((wales or "south wales") not "new south wales") or welsh\* ) )
- 23  
24 TI ( (bath or "bath's" or ((birmingham not alabama\*) or ("birmingham's" not alabama\*)  
25 or bradford or "bradford's" or brighton or "brighton's" or bristol or "bristol's" or carlisle\*  
26 or "carlisle's" or (cambridge not (massachusetts\* or boston\* or harvard\*)) or  
27 ("cambridge's" not (massachusetts\* or boston\* or harvard\*)) or (canterbury not  
28 zealand\*) or ("canterbury's" not zealand\*) or chelmsford or "chelmsford's" or chester or  
29 "chester's" or chichester or "chichester's" or coventry or "coventry's" or derby or  
30 "derby's" or (durham not (carolina\* or nc)) or ("durham's" not (carolina\* or nc)) or ely or  
31 "ely's" or exeter or "exeter's" or gloucester or "gloucester's" or hereford or "hereford's"  
32 or hull or "hull's" or lancaster or "lancaster's" or leeds\* or leicester or "leicester's" or  
33 (lincoln not nebraska\*) or ("lincoln's" not nebraska\*) or (liverpool not (new south wales\*  
34 or nsw)) or ("liverpool's" not (new south wales\* or nsw)) or ((london not (ontario\* or ont  
35 or toronto\*)) or ("london's" not (ontario\* or ont or toronto\*)) or manchester or  
36 "manchester's" or (newcastle not (new south wales\* or nsw)) or ("newcastle's" not (new  
37 south wales\* or nsw)) or norwich or "norwich's" or nottingham or "nottingham's" or  
38 oxford or "oxford's" or peterborough or "peterborough's" or plymouth or "plymouth's" or  
39 portsmouth or "portsmouth's" or preston or "preston's" or ripon or "ripon's" or salford or  
40 "salford's" or salisbury or "salisbury's" or sheffield or "sheffield's" or southampton or  
41 "southampton's" or st albans or stoke or "stoke's" or sunderland or "sunderland's" or  
42 truro or "truro's" or wakefield or "wakefield's" or wells or westminster or "westminster's"  
43 or winchester or "winchester's" or wolverhampton or "wolverhampton's" or (worcester  
44 not (massachusetts\* or boston\* or harvard\*)) or ("worcester's" not (massachusetts\* or  
45 boston\* or harvard\*)) or (york not ("new york\*" or ny or ontario\* or ont or toronto\*)) or  
46 ("york's" not ("new york\*" or ny or ontario\* or ont or toronto\*)))) ) OR AB ( (bath or  
47 "bath's" or ((birmingham not alabama\*) or ("birmingham's" not alabama\*) or bradford or  
48 "bradford's" or brighton or "brighton's" or bristol or "bristol's" or carlisle\* or "carlisle's" or  
49 (cambridge not (massachusetts\* or boston\* or harvard\*)) or ("cambridge's" not  
50 (massachusetts\* or boston\* or harvard\*)) or (canterbury not zealand\*) or  
51 ("canterbury's" not zealand\*) or chelmsford or "chelmsford's" or chester or "chester's"  
52 or chichester or "chichester's" or coventry or "coventry's" or derby or "derby's" or  
53 (durham not (carolina\* or nc)) or ("durham's" not (carolina\* or nc)) or ely or "ely's" or  
54 exeter or "exeter's" or gloucester or "gloucester's" or hereford or "hereford's" or hull or  
55 "hull's" or lancaster or "lancaster's" or leeds\* or leicester or "leicester's" or (lincoln not  
56 nebraska\*) or ("lincoln's" not nebraska\*) or (liverpool not (new south wales\* or nsw)) or  
57 ("liverpool's" not (new south wales\* or nsw)) or ((london not (ontario\* or ont or  
58 toronto\*)) or ("london's" not (ontario\* or ont or toronto\*)) or manchester or  
59 "manchester's" or (newcastle not (new south wales\* or nsw)) or ("newcastle's" not (new  
60 south wales\* or nsw)) or norwich or "norwich's" or nottingham or "nottingham's" or  
61 oxford or "oxford's" or peterborough or "peterborough's" or plymouth or "plymouth's" or  
62 portsmouth or "portsmouth's" or preston or "preston's" or ripon or "ripon's" or salford or  
63 "salford's" or salisbury or "salisbury's" or sheffield or "sheffield's" or southampton or

1  
2  
3  
4  
5  
6  
7  
8  
9  
10  
11  
12  
13  
14  
15  
16  
17  
18  
19  
20  
21  
22  
23  
24  
25  
26  
27  
28  
29  
30  
31  
32  
33  
34  
35  
36  
37  
38  
39  
40  
41  
42  
43  
44  
45  
46  
47  
48  
49  
50  
51  
52  
53  
54  
55  
56  
57  
58  
59  
60

"southampton's" or st albans or stoke or "stoke's" or sunderland or "sunderland's" or truro or "truro's" or wakefield or "wakefield's" or wells or westminster or "westminster's" or winchester or "winchester's" or wolverhampton or "wolverhampton's" or (worchester not (massachusetts\* or boston\* or harvard\*)) or ("worchester's" not (massachusetts\* or boston\* or harvard\*)) or (york not ("new york\*" or ny or ontario\* or ont or toronto\*)) or ("york's" not ("new york\*" or ny or ontario\* or ont or toronto\*)))) ) OR AF ( (bath or "bath's" or ((birmingham not alabama\*) or ("birmingham's" not alabama\*) or bradford or "bradford's" or brighton or "brighton's" or bristol or "bristol's" or carlisle\* or "carlisle's" or (cambridge not (massachusetts\* or boston\* or harvard\*)) or ("cambridge's" not (massachusetts\* or boston\* or harvard\*)) or (canterbury not zealand\*) or ("canterbury's" not zealand\*) or chelmsford or "chelmsford's" or chester or "chester's" or chichester or "chichester's" or coventry or "coventry's" or derby or "derby's" or (durham not (carolina\* or nc)) or ("durham's" not (carolina\* or nc)) or ely or "ely's" or exeter or "exeter's" or gloucester or "gloucester's" or hereford or "hereford's" or hull or "hull's" or lancaster or "lancaster's" or leeds\* or leicester or "leicester's" or (lincoln not nebraska\*) or ("lincoln's" not nebraska\*) or (liverpool not (new south wales\* or nsw)) or ("liverpool's" not (new south wales\* or nsw)) or ((london not (ontario\* or ont or toronto\*)) or ("london's" not (ontario\* or ont or toronto\*)) or manchester or "manchester's" or (newcastle not (new south wales\* or nsw)) or ("newcastle's" not (new south wales\* or nsw)) or norwich or "norwich's" or nottingham or "nottingham's" or oxford or "oxford's" or peterborough or "peterborough's" or plymouth or "plymouth's" or portsmouth or "portsmouth's" or preston or "preston's" or ripon or "ripon's" or salford or "salford's" or salisbury or "salisbury's" or sheffield or "sheffield's" or southampton or "southampton's" or st albans or stoke or "stoke's" or sunderland or "sunderland's" or truro or "truro's" or wakefield or "wakefield's" or wells or westminster or "westminster's" or winchester or "winchester's" or wolverhampton or "wolverhampton's" or (worchester not (massachusetts\* or boston\* or harvard\*)) or ("worchester's" not (massachusetts\* or boston\* or harvard\*)) or (york not ("new york\*" or ny or ontario\* or ont or toronto\*)) or ("york's" not ("new york\*" or ny or ontario\* or ont or toronto\*)))) )

TI ( (bangor or "bangor's" or cardiff or "cardiff's" or newport or "newport's" or st asaph or "st asaph's" or st davids or swansea or "swansea's") ) OR AB ( (bangor or "bangor's" or cardiff or "cardiff's" or newport or "newport's" or st asaph or "st asaph's" or st davids or swansea or "swansea's") ) OR AF ( (bangor or "bangor's" or cardiff or "cardiff's" or newport or "newport's" or st asaph or "st asaph's" or st davids or swansea or "swansea's") )

S59

TI ( (aberdeen or "aberdeen's" or dundee or "dundee's" or edinburgh or "edinburgh's" or glasgow or "glasgow's" or inverness or (perth not australia\*) or ("perth's" not australia\*) or stirling or "stirling's") ) OR AB ( (aberdeen or "aberdeen's" or dundee or "dundee's" or edinburgh or "edinburgh's" or glasgow or "glasgow's" or inverness or (perth not australia\*) or ("perth's" not australia\*) or stirling or "stirling's") ) OR AF ( (aberdeen or "aberdeen's" or dundee or "dundee's" or edinburgh or "edinburgh's" or glasgow or "glasgow's" or inverness or (perth not australia\*) or ("perth's" not australia\*) or stirling or "stirling's") )

S60

TI ( (armagh or "armagh's" or belfast or "belfast's" or lisburn or "lisburn's" or londonderry or "londonderry's" or derry or "derry's" or newry or "newry's") ) OR AB ( (armagh or "armagh's" or belfast or "belfast's" or lisburn or "lisburn's" or londonderry or "londonderry's" or derry or "derry's" or newry or "newry's") ) OR AF ( (armagh or "armagh's" or belfast or "belfast's" or lisburn or "lisburn's" or londonderry or "londonderry's" or derry or "derry's" or newry or "newry's") )

S61

S62

S54 OR S55 OR S56 OR S57 OR S58 OR S59 OR S60 OR S61

((MH "Africa+") OR (MH "America+") OR (MH "North America+") OR (MH "Latin America") OR (MH "Central America+") OR (MH "Antarctic Regions") OR (MH "Arctic Regions") OR (MH "Asia+") OR (MH "Asia, Western+") OR (MH "Asia, Central+") OR (MH "Australia+") OR (MH "New Zealand")) NOT ((MH "Europe+") OR (MH "Great Britain") OR (MH "United Kingdom+"))

S63

1  
2  
3  
4 S64 S62 NOT S63  
5 S65 PT case report or case study  
6  
7 S66 PT letter  
8  
9 (((MH "Animals+") OR (MH "Animal Studies") OR (TI "animal model\*")) NOT (MH  
10 S67 "human"))  
11 S68 S65 OR S66 OR S67  
12  
13 S69 S3 AND S24 AND S48  
14  
15 S70 S3 AND S24 AND S53  
16  
17 S71 S69 OR S70  
18 S72 S64 AND S71  
19  
20 S73 S72 NOT S68  
21  
22  
23  
24  
25  
26  
27  
28  
29  
30  
31  
32  
33  
34  
35  
36  
37  
38  
39  
40  
41  
42  
43  
44  
45  
46  
47  
48  
49  
50  
51  
52  
53  
54  
55  
56  
57  
58  
59  
60

### Appendix S3.9: Search Strategies – Others

#### NICE Evidence Search (<https://www.evidence.nhs.uk>) –

Colorectal cancer and inequal\*

Colorectal cancer and depriv\*

NB. The repeat searches did not utilise NICE Evidence Search due to the website's closure.

#### Base search (<https://www.base-search.net>)

Limits placed - Content providers as United Kingdom and Document Type set to: Text (all) and Dataset and Unknown. This meant excluding: Musical Notation, Map, Audio, Software and Image/Video.

Colorectal cancer and inequal\*

Colorectal cancer and depriv\*

#### Google Advanced Search ([https://www.google.com/advanced\\_search](https://www.google.com/advanced_search))

Colorectal cancer and inequal\*

Colorectal cancer and depriv\*

Limited to the first 5 pages of results unless the search still appeared relevant, in which case the search would have continued.



## Appendix S4: Development and Validation of the Search Strategy and Record Management

The search was developed in MEDLINE using free-text words and subject indexing terms and subsequently adapted for the other databases. Briefly, the search strategies combined different concepts:

- Colorectal cancer *and* socioeconomic inequalities *and* system interval *and* the UK
- Or, colorectal cancer *and* socioeconomic inequalities *and* treatment *and* the UK

Search filters were used to focus on UK-based studies and exclude non-human studies to improve specificity.<sup>45,46</sup> The search strategy was reviewed by SG using the Peer Review of Electronic Search Strategies for systematic reviews guideline.<sup>47</sup>

Two systematic reviews provided the initial search strategy for the treatment, interval and socioeconomic inequality concepts.<sup>48,49</sup> Further search terms were identified from search filters.<sup>50-52</sup> Thirty-five potentially relevant studies were subsequently used to identify further search terms using MeSH Analyzer, a word frequency analysis tool.<sup>53</sup>

The search strategy was tested against a set of the 35 known, potentially relevant records. The results of the draft MEDLINE search strategy found 31 of 35 potentially relevant articles.

The search was subsequently refined and was able to capture one further article. However, no other changes to the strategy were possible due to a lack of possible candidate search terms in the title/abstract or subject indexing terms of the remaining three uncaptured articles.

The authors of the current systematic review also conducted an almost identical systematic review about ovarian cancer. For this reason, some of the studies used in the development process were about ovarian cancer. However, this development process enhanced the search strategy for both systematic reviews. The potentially relevant studies are referenced here. Not all were necessarily deemed eligible for inclusion in either of the final two systematic reviews.<sup>4,6-10,12-15,17-20,23-26,28,29,34-39,54-62</sup>

Search results were imported into EndNote X9,<sup>42</sup> and duplicates were removed using adapted EndNote de-duplication methods published by Bramer et al., 2016.<sup>63</sup> The remaining search results were transferred to Covidence systematic review software.<sup>64</sup>

## Appendix S5: Data items and effect measures

The following data were extracted: first author, year of publication, data source, region/country, years of diagnosis, site (colon vs rectal), stage, size of the analytical cohort, measure of socioeconomic status, and the number of socioeconomic groups. Assumptions about missing or unclear information were clearly stated.

For all included studies, data for the following outcomes were extracted:

- Measures of the system interval length, including precise definitions of the time intervals.
  - Effects of socioeconomic factors on the system interval were assessed using coefficients from regression analyses.
  - Or else rates of patients meeting targets were extracted. The odds of meeting targets amongst patients from the most deprived group compared to the least deprived group were calculated. 95% confidence intervals were calculated using RevMan 5.4.<sup>65</sup>
- Cancer-directed therapy received, including the timescale and definitions of treatment. The extracted effect measures were:
  - Adjusted estimates for the likelihood of a particular treatment for the most deprived socioeconomic groups, with 95% confidence intervals. Details of confounding variables were also extracted.
  - If unavailable, unadjusted rates were extracted. The odds of treatment amongst patients from the most deprived group compared to the least deprived group were calculated. 95% confidence intervals were calculated using RevMan 5.4.<sup>65</sup> Statistical tests of association were reported when available.

## Appendix S6: Study Risk of Bias Assessment

|                               | Selection bias     |                    |                                               |                                               | Prognostic factor measurement                                                      | Outcome measurement                          | Study confounding                                                   | Statistical reporting                          | Strength of Evidence |
|-------------------------------|--------------------|--------------------|-----------------------------------------------|-----------------------------------------------|------------------------------------------------------------------------------------|----------------------------------------------|---------------------------------------------------------------------|------------------------------------------------|----------------------|
| First author (Date published) | Inclusion criteria | Exclusion criteria | Baseline characteristics adequately described | Source and time period adequate and described | Clear and valid definition of socioeconomic status, measurement and categorisation | Clear definition and methods for the outcome | Important potential confounding factors appropriately accounted for | Appropriate analysis and all outcomes reported |                      |
| Bailey (2002)                 | High               | High               | Moderate                                      | High                                          | High                                                                               | High                                         | High                                                                | High                                           | Weak                 |
| Bharathan (2011)              | Moderate           | Moderate           | Low                                           | Moderate                                      | Moderate                                                                           | High                                         | High                                                                | High                                           | Weak                 |
| Benitez Majano (2022) [1]     | Low                | Low                | Low                                           | Moderate                                      | Low                                                                                | Low                                          | Low                                                                 | Low                                            | Strong               |
| Benitez Majano (2022) [2]     | Low                | Low                | Low                                           | Moderate                                      | Low                                                                                | Low                                          | Low                                                                 | Low                                            | Strong               |
| Boyle (2020)                  | Low                | Low                | Low                                           | Low                                           | Low                                                                                | Low                                          | Low                                                                 | Low                                            | Strong               |
| Campbell (2002)               | High               | High               | Low                                           | High                                          | Low                                                                                | Moderate                                     | Moderate                                                            | High                                           | Weak                 |
| Crawford (2012)               | Moderate           | Moderate           | High                                          | Moderate                                      | Moderate                                                                           | High                                         | Moderate                                                            | High                                           | Weak                 |
| Di Girolamo (2018)            | Low                | Low                | Low                                           | Low                                           | Low                                                                                | Low                                          | Moderate                                                            | Low                                            | Strong               |
| Fenton (2019)                 | Low                | Low                | Low                                           | Low                                           | Low                                                                                | Low                                          | Low                                                                 | Low                                            | Strong               |
| Fenton (2020)                 | Low                | Low                | Low                                           | Low                                           | Low                                                                                | Low                                          | Low                                                                 | Low                                            | Strong               |
| Harris (2009)                 | Moderate           | High               | Low                                           | High                                          | Low                                                                                | High                                         | High                                                                | High                                           | Weak                 |
| Hassan (2023)                 | Low                | Low                | Low                                           | Low                                           | Low                                                                                | Low                                          | Moderate                                                            | Low                                            | Strong               |
| Hayes (2019)                  | Low                | Moderate           | Low                                           | Moderate                                      | Low                                                                                | Moderate                                     | Low                                                                 | Low                                            | Strong               |
| Hayes (2021)                  | Low                | Low                | Low                                           | Moderate                                      | Low                                                                                | Moderate                                     | Low                                                                 | Low                                            | Strong               |
| Hole (2002)                   | Moderate           | High               | Low                                           | Moderate                                      | Moderate                                                                           | High                                         | High                                                                | High                                           | Weak                 |
| Jones (2008)                  | Moderate           | Moderate           | High                                          | Moderate                                      | Moderate                                                                           | High                                         | Moderate                                                            | Moderate                                       | Weak                 |

Appendix S6: Study Risk of Bias Assessment - CONTINUED

|                                             | Selection bias     |                    |                                               |                                               | Prognostic factor measurement                                                      | Outcome measurement                          | Study confounding                                                   | Statistical reporting                          | Strength of Evidence |
|---------------------------------------------|--------------------|--------------------|-----------------------------------------------|-----------------------------------------------|------------------------------------------------------------------------------------|----------------------------------------------|---------------------------------------------------------------------|------------------------------------------------|----------------------|
| First author (Date published)               | Inclusion criteria | Exclusion criteria | Baseline characteristics adequately described | Source and time period adequate and described | Clear and valid definition of socioeconomic status, measurement and categorisation | Clear definition and methods for the outcome | Important potential confounding factors appropriately accounted for | Appropriate analysis and all outcomes reported |                      |
| Lejeune (2010)                              | Low                | Low                | Low                                           | Low                                           | Low                                                                                | High                                         | Moderate                                                            | Moderate                                       | Moderate             |
| McLeod (1999)                               | Moderate           | Moderate           | High                                          | Moderate                                      | Low                                                                                | Low                                          | High                                                                | High                                           | Weak                 |
| Morris (2008)                               | Low                | Low                | Low                                           | Low                                           | Low                                                                                | Low                                          | Moderate                                                            | Low                                            | Strong               |
| Morris (2010)                               | Low                | Moderate           | Low                                           | Low                                           | Low                                                                                | Low                                          | Low                                                                 | Low                                            | Strong               |
| Morris (2016)                               | Moderate           | High               | Low                                           | Low                                           | Low                                                                                | Low                                          | High                                                                | High                                           | Weak                 |
| National Cancer Intelligence Network (2011) | Low                | Low                | High                                          | Low                                           | High                                                                               | Low                                          | High                                                                | High                                           | Weak                 |
| NCRAS (2018)                                | Low                | Low                | Low                                           | Low                                           | Low                                                                                | Low                                          | High                                                                | Moderate                                       | Moderate             |
| Neal (2005)                                 | High               | High               | High                                          | Moderate                                      | Low                                                                                | High                                         | High                                                                | Moderate                                       | Weak                 |
| Nicholson (2012)                            | Moderate           | Moderate           | Low                                           | High                                          | High                                                                               | Moderate                                     | Moderate                                                            | High                                           | Weak                 |
| Paterson (2014)                             | Moderate           | Moderate           | Low                                           | Moderate                                      | Low                                                                                | High                                         | Moderate                                                            | High                                           | Weak                 |
| Pearson (2019)                              | Low                | Low                | Low                                           | Low                                           | Low                                                                                | Low                                          | Low                                                                 | Low                                            | Strong               |
| Pitchforth (2002)                           | Low                | Low                | Low                                           | Moderate                                      | Moderate                                                                           | Moderate                                     | High                                                                | Moderate                                       | Moderate             |
| Pollock and Vickers (1998)                  | Moderate           | Moderate           | High                                          | High                                          | Low                                                                                | Moderate                                     | High                                                                | High                                           | Weak                 |
| Price (2020)                                | Low                | Low                | Moderate                                      | Low                                           | Low                                                                                | Low                                          | Moderate                                                            | Low                                            | Strong               |

## Appendix S6: Study Risk of Bias Assessment - CONTINUED

|                               | Selection bias     |                    |                                               |                                               | Prognostic factor measurement                                                      | Outcome measurement                          | Study confounding                                                   | Statistical reporting                          | Strength of Evidence |
|-------------------------------|--------------------|--------------------|-----------------------------------------------|-----------------------------------------------|------------------------------------------------------------------------------------|----------------------------------------------|---------------------------------------------------------------------|------------------------------------------------|----------------------|
| First author (Date published) | Inclusion criteria | Exclusion criteria | Baseline characteristics adequately described | Source and time period adequate and described | Clear and valid definition of socioeconomic status, measurement and categorisation | Clear definition and methods for the outcome | Important potential confounding factors appropriately accounted for | Appropriate analysis and all outcomes reported |                      |
| Radwan (2016)                 | Moderate           | Moderate           | Moderate                                      | Moderate                                      | Moderate                                                                           | High                                         | High                                                                | High                                           | Weak                 |
| Raine (2010)                  | Low                | Low                | Low                                           | Moderate                                      | Low                                                                                | Moderate                                     | High                                                                | High                                           | Weak                 |
| Redanial (2014)               | Low                | Low                | Low                                           | Low                                           | Low                                                                                | Low                                          | Moderate                                                            | Moderate                                       | Strong               |
| Saito (2019) [1]              | Low                | Low                | Low                                           | Low                                           | Low                                                                                | Low                                          | Low                                                                 | Low                                            | Strong               |
| Saito (2021) [2]              | Low                | Low                | Low                                           | Low                                           | Low                                                                                | Low                                          | Low                                                                 | Low                                            | Strong               |
| Shack (2009)                  | Low                | Low                | Low                                           | Moderate                                      | Low                                                                                | Moderate                                     | Low                                                                 | Moderate                                       | Strong               |
| Smith (2006)                  | Moderate           | Moderate           | Low                                           | High                                          | Low                                                                                | High                                         | High                                                                | High                                           | Weak                 |
| Taylor (2021)                 | Low                | Low                | Low                                           | Low                                           | Low                                                                                | Low                                          | Low                                                                 | Low                                            | Strong               |
| Tilney (2008)                 | Moderate           | High               | Low                                           | Moderate                                      | Low                                                                                | Low                                          | High                                                                | Moderate                                       | Weak                 |
| Tilney (2009)                 | Moderate           | Moderate           | Low                                           | High                                          | Low                                                                                | Low                                          | High                                                                | High                                           | Weak                 |
| Vallance (2018)               | Low                | Low                | Low                                           | Low                                           | Low                                                                                | Low                                          | Low                                                                 | Low                                            | Strong               |

Appendix S7: Characteristics of Included Studies

| First Author (Year)       | Data Source                               | Region/Country           | Site       | Stage      | Years Studied                                | Measure of SES (No. Groups)                | Broad Outcome                                              |
|---------------------------|-------------------------------------------|--------------------------|------------|------------|----------------------------------------------|--------------------------------------------|------------------------------------------------------------|
| Bailey (2002)             | Patients enrolled from six study centres. | England (Not Specified)  | Colorectal | Dukes' C   | Not recorded                                 | Economic Resources Domain - OARS OMFAQ (2) | Chemotherapy                                               |
| Benitez Majano [1] (2022) | Cancer Registration Data, CPRD, HES.      | England                  | Colon      | All stages | Diagnosed 2011-2015                          | IMD 2015 (5)                               | System Interval                                            |
| Benitez Majano [2] (2022) | Cancer Registration Data, CPRD, HES.      | England                  | Colorectal | All stages | Diagnosed 2011-2015                          | IMD 2015 (5)                               | System Interval                                            |
| Bharathan (2011)          | Colorectal Cancer Audit Group Database.   | Northern England         | Colorectal | All stages | Admitted/Referred to Surgical Unit 1998-2002 | IMD 2004 – without health (5)              | Surgery                                                    |
| Boyle (2020)              | NBOCA, HES, SACT.                         | England                  | Colon      | Stage III  | Diagnosed 2014-2017                          | IMD (5)                                    | Chemotherapy                                               |
| Campbell (2002)           | Case notes. Scottish Cancer Registry.     | North/Northeast Scotland | Colorectal | All stages | Diagnosed 1995-1996                          | Carstairs Index 1991 (5)                   | Chemotherapy<br>Radiotherapy<br>Surgery<br>System Interval |
| Crawford (2012)           | Northern and Yorkshire Cancer Registry.   | Northern England         | Colorectal | All stages | Diagnosed 1994-2002                          | IMD - without access to services (4)       | Any Treatment<br>Chemotherapy                              |
| Di Girolamo (2018)        | Cancer Registration Data, NBOCA, CWT.     | England                  | Colorectal | All stages | Diagnosed 2009-2013                          | IMD Assumed 2007 - Income Domain (5)       | System Interval                                            |
| Fenton (2019)             | CORECT-R, Cancer Registration Data, HES.  | England                  | Colorectal | All stages | Major resection for CRC in 2005-2012         | IMD 2010 – Income Domain (5)               | Liver Resection                                            |

## Appendix S7: Characteristics of Included Studies - CONTINUED

| First Author<br>(Year) | Data Source                                                    | Region/Country      | Site       | Stage                | Years Studied                               | Measure of SES<br>(No. Groups)                 | Broad Outcome                           |
|------------------------|----------------------------------------------------------------|---------------------|------------|----------------------|---------------------------------------------|------------------------------------------------|-----------------------------------------|
| <b>Fenton (2021)</b>   | CORECT-R, Cancer Registration Data, HES.                       | England             | Colorectal | All stages           | Major resection for CRC in 2005-2013        | IMD 2010 – Income Domain (5)                   | Pulmonary Resection                     |
| <b>Harris (2009)</b>   | Database of patients at an MDT                                 | Birmingham, England | Rectal     | Assumed all stages   | Diagnosed 2000-2007                         | IMD 2004 - Assumed Income Domain (5)           | Surgery                                 |
| <b>Hassan (2023)</b>   | Cancer Registration Data, ONS, SACT.                           | England             | Colon      | Stage III            | Diagnosed 2012-2017                         | IMD 2015 & 2019 (5)                            | Combination Chemotherapy                |
| <b>Hayes (2019)</b>    | Northern and Yorkshire Cancer Registry, HES.                   | Northern England    | Colon      | All stages           | Diagnosed 1999-2010                         | IMD - Income Domain (5)                        | Chemotherapy<br>Surgery                 |
| <b>Hayes (2021)</b>    | Northern and Yorkshire Cancer Registry, HES.                   | Northern England    | Colorectal | All stages           | Diagnosed 2001-2010                         | IMD 2007 & 2010 - Income Domain (5)            | System Interval                         |
| <b>Hole (2002)</b>     | Audit in eight hospitals.                                      | Central Scotland    | Colorectal | All stages           | Resection in 1991-1994                      | Carstairs Index 1991 (3)                       | Chemotherapy                            |
| <b>Jones (2008)</b>    | Yorkshire Registry and Northern and Yorkshire Cancer Registry. | Northern England    | Colorectal | All stages           | Diagnosed 1994-2002                         | IMD 2004 – without access domain (scored 0-80) | Chemotherapy<br>Radiotherapy<br>Surgery |
| <b>Lejeune (2010)</b>  | Northern and Yorkshire Cancer Registry, TCR, ECRIC.            | England             | Colorectal | All stages           | Diagnosed 1997-2000                         | Townsend Index 2001 (5)                        | Any Treatment<br>System Interval        |
| <b>McLeod (1999)</b>   | Hospital Discharge Data (SMR1).                                | Scotland            | Colorectal | All stages (assumed) | First Inpatient Treatment For CRC 1990-1994 | Carstairs Index 1999 (4)                       | Chemotherapy                            |

Appendix S7: Characteristics of Included Studies - CONTINUED

| First Author (Year) | Data Source                                 | Region/Country          | Site       | Stage                           | Years Studied                        | Measure of SES (No. Groups)                | Broad Outcome                                              |
|---------------------|---------------------------------------------|-------------------------|------------|---------------------------------|--------------------------------------|--------------------------------------------|------------------------------------------------------------|
| Morris (2008)       | Cancer Registration Data, HES.              | England                 | Rectal     | All stages who had APER or AR   | Diagnosed 1998-2004                  | IMD 2004 – Income Domain (5)               | APER vs AR                                                 |
| Morris (2010)       | Cancer Registration Data, HES.              | England                 | Colorectal | All stages                      | Major resection for CRC in 1998-2004 | IMD 2004 – Income Domain (5)               | Liver Resection                                            |
| Morris (2016)       | Cancer Registration Data, HES, RTDS.        | England                 | Rectal     | All stages post major resection | Diagnosed 2009-2010                  | IMD – Income Domain (5)                    | Radiotherapy                                               |
| Neal (2005)         | National Survey of NHS Patients: Cancer     | England (Not Specified) | Colorectal | Not recorded                    | Not recorded                         | Occupation (8)                             | System Interval                                            |
| NCIN (2011)         | Cancer Registration Data, HES.              | England                 | Colorectal | All stages                      | Diagnosed 2004-2006                  | IMD – assumed (5)                          | Surgery                                                    |
| NCRAS (2018)        | Cancer Registration Data, HES, SACT.        | England                 | Colorectal | All stages                      | Diagnosed 2013-2015                  | IMD 2015 – Income Domain (5)               | Chemotherapy<br>Radiotherapy<br>Surgery                    |
| Nicholson (2012)    | Clinical Audit Database.                    | West of Scotland        | Rectal     | All stages                      | Surgery in 2001-2005                 | Not recorded                               | APER vs AR                                                 |
| Paterson (2014)     | Southeast Scotland Cancer Network Database. | Southeast Scotland      | Colorectal | All stages                      | Diagnosed 2003-2009                  | Scottish Index of Multiple Deprivation (5) | Chemotherapy<br>Radiotherapy<br>Surgery<br>System Interval |



## Appendix S7: Characteristics of Included Studies - CONTINUED

| First Author<br>(Year)   | Data Source                                    | Region/Country         | Site       | Stage                | Years Studied                                                       | Measure of SES<br>(No. Groups)          | Broad Outcome                   |
|--------------------------|------------------------------------------------|------------------------|------------|----------------------|---------------------------------------------------------------------|-----------------------------------------|---------------------------------|
| <b>Pearson (2019)</b>    | Cancer Registration Data, CWT, DID, HES, RtD.  | England                | Colorectal | All stages           | Diagnosed 2014-2015                                                 | IMD 2015 – Income Domain (5)            | System Interval                 |
| <b>Pitchforth (2002)</b> | Scottish Cancer Registration, SMR1.            | Scotland               | Colorectal | All stages (Assumed) | Diagnosed 1992-1996                                                 | Carstairs Index (4)                     | Chemotherapy                    |
| <b>Pollock (1998)</b>    | HES, ONS.                                      | Thames Region, England | Colorectal | Not recorded         | Inpatient FCE with a CRC diagnosis in the financial years 1992-1995 | Townsend Score (10)                     | Surgery                         |
| <b>Price (2020)</b>      | CPRD, Cancer Registration Data, ONS.           | England                | Colorectal | All stages (Assumed) | Diagnosed 2006-2017                                                 | Townsend Score 2001 (5)                 | System Interval                 |
| <b>Radwan (2016)</b>     | Swansea Pelvic Oncology Group Database.        | Swansea, Wales         | Rectal     | All stages           | Pelvic exenteration in 2006-2014                                    | Welsh Index of Multiple Deprivation (4) | Chemo – radiotherapy TPE vs PPE |
| <b>Raine (2010)</b>      | HES                                            | England                | Rectal     | All stages (Assumed) | Admission for rectal cancer surgery 1999-2006                       | IMD 2004 (5)                            | AR vs APER                      |
| <b>Redanial (2014)</b>   | Northern and Yorkshire and South West Offices. | England                | Colorectal | Dukes' Stages A/B    | Diagnosed 1996-2009                                                 | IMD 2007 – Income Domain (5)            | System Interval                 |
| <b>Saito [1] (2019)</b>  | Cancer Registration Data, HES, NBOCA.          | England                | Colorectal | All stages           | Diagnosed 2010-2013                                                 | IMD 2010 – Income Domain (5)            | Surgery                         |
| <b>Saito [2] (2021)</b>  | Cancer Registration Data, HES, NBOCA.          | England                | Colon      | All stages           | Diagnosed 2010-2013                                                 | IMD 2010 – Income Domain (5)            | System Interval                 |

Appendix S7: Characteristics of Included Studies - CONTINUED

| First Author (Year) | Data Source                                                   | Region/Country    | Site       | Stage        | Years Studied                                                 | Measure of SES (No. Groups)  | Broad Outcome                           |
|---------------------|---------------------------------------------------------------|-------------------|------------|--------------|---------------------------------------------------------------|------------------------------|-----------------------------------------|
| Shack (2009)        | Northwest and Merseyside and Cheshire Cancer Registries, HES. | Northwest England | Colorectal | All stages   | Diagnosed 1997-2004                                           | IMD 2001 – Income Domain (5) | Chemotherapy<br>Surgery<br>Radiotherapy |
| Smith (2006)        | ACPGBI Bowel Cancer Database                                  | England           | Colorectal | All stages   | Diagnosed 2001-2002                                           | Townsend Score 2001 (4)      | APER vs AR                              |
| Taylor (2021)       | CORECT-R, HES, SACT.                                          | England           | Colorectal | Stage II-III | Diagnosed 2014-2015                                           | IMD 2010 – Income Domain (5) | Chemotherapy                            |
| Tilney (2008)       | HES.                                                          | England           | Colorectal | Not recorded | APER or AR surgery in 1996-2004                               | IMD 2004 (5)                 | APER vs AR                              |
| Tilney (2009)       | ACPGBI Bowel Cancer Database                                  | England           | Rectal     | Dukes’ A-C   | Diagnosed in 2000-2005                                        | IMD 2004 (5)                 | APER vs AR                              |
| Vallance (2018)     | HES, NBOCA.                                                   | England           | Colorectal | Stage IV     | Diagnosed 2011-2015 with synchronous liver-limited metastases | IMD (5)                      | Liver resection                         |

Abbreviations: ACPGBI Association of Coloproctology of Great Britain and Ireland, APER Abdominoperineal Resection, AR Anterior Resection, CORECT-R Colorectal Cancer Data Repository, CRC Colorectal Cancer, CPRD Clinical Practice Research Datalink, CWT National Cancer Waiting Times Dataset, DID Diagnostic Imaging Dataset, ECRIC Eastern Cancer Registration and Information Centre, FCE Finished Consultant Episode, HES hospital episode statistics, IMD index of multiple deprivation, NBOCA National Bowel Cancer Audit, NCIN National Cancer Intelligence Network, NCRAS National Cancer Registration and Analysis Service, OARS The Duke Older Americans Resources and Services Instrument, OMFAQ The OARS Multidimensional Functional Assessment Questionnaire, ONS Office for National Statistics, PPE Partial

1  
2  
3 Pelvic Exenteration, RtD Routes to Diagnosis, RTDS Radiotherapy Dataset, SACT systematic anti-cancer therapy dataset, SES socioeconomic status, SMR1 Scottish  
4 Morbidity Record-1, TCR Thames Cancer Registry, TPE Total Pelvic Exenteration.  
5  
6  
7  
8  
9  
10  
11  
12  
13  
14  
15  
16  
17  
18  
19  
20  
21  
22  
23  
24  
25  
26  
27  
28  
29  
30  
31  
32  
33  
34  
35  
36  
37  
38  
39  
40  
41  
42  
43  
44  
45  
46

For peer review only

Appendix S8: Results of studies reporting variations in the system interval

| First Author<br>(Year)               | Number   | Adjusted for                                        | Outcome of Interest                         | Odds ratio (95% CI) or other<br>measure                                                                                                          | Effect of<br>deprivation on<br>interval length<br>[Longer↑ Shorter↓] | Strength<br>of<br>Evidence |
|--------------------------------------|----------|-----------------------------------------------------|---------------------------------------------|--------------------------------------------------------------------------------------------------------------------------------------------------|----------------------------------------------------------------------|----------------------------|
| <b>Benitez Majano<br/>(2022) [1]</b> | 2,115    | Age   Comorbidities   GP Visits  <br>Sex   Symptoms | First presentation to<br>diagnosis interval | Quantile Regression - 50 <sup>th</sup> centile*<br>Ref adj interval 126.0 (94.5,157.5) †<br>MD adj interval 204.1 days<br>(151.0,257.3)   p=0.04 | ↑                                                                    | Strong                     |
| <b>Benitez Majano<br/>(2022) [2]</b> | C: 3,215 | Age   Comorbidities   Sex  <br>Symptoms   Test Type | Test to diagnosis<br>interval               | Quantile Regression - 50 <sup>th</sup> centile*<br>LD ref group<br>MD adj coef 0.7<br>(-2.7,4.1)   p=0.729                                       | =                                                                    | Strong                     |
|                                      |          | Age   Comorbidities   Sex  <br>Symptoms             | First presentation to<br>diagnosis interval | Quantile Regression - 50 <sup>th</sup> centile*<br>LD ref group<br>MD adj coef 91.0<br>(21.0,161.0)   p=0.028                                    | ↑                                                                    |                            |
|                                      | R: 1,621 | Age   Comorbidities   Sex  <br>Symptoms   Test Type | Test to diagnosis<br>Interval               | Quantile Regression - 50 <sup>th</sup> centile*<br>LD ref group<br>MD adj coef 0.0<br>(-4,0.4)   p=1.00                                          | =                                                                    |                            |
|                                      |          | Age   Comorbidities   Sex  <br>Symptoms             | First presentation to<br>diagnosis interval | Quantile Regression - 50 <sup>th</sup> centile*<br>LD ref group<br>MD adj coef 78.8<br>(14.8,142.7)   p=0.258                                    | =                                                                    |                            |

## Appendix S8: Results of studies reporting variations in the system interval – CONTINUED

| First Author<br>(Year)        | Number  | Adjusted for                              | Outcome of Interest                                        | Odds ratio (95% CI) or other<br>measure                        | Effect of deprivation<br>on interval length<br>[Longer↑ Shorter↓] | Strength<br>of<br>Evidence |
|-------------------------------|---------|-------------------------------------------|------------------------------------------------------------|----------------------------------------------------------------|-------------------------------------------------------------------|----------------------------|
| <b>Campbell<br/>(2002)</b>    | 653     | Distance   Presentation  <br>Stage        | Referral to treatment interval                             | Cox Regression<br>LD HR 1.0<br>MD adjusted HR 1.24 (0.93,1.67) | =                                                                 | Weak                       |
| <b>Di Girolamo<br/>(2018)</b> | 50,955  | No adjustment                             | Referral to first seen interval<br>[Within 2 weeks Y/N]    | (Derived)<br>LD OR 1.0<br>MD OR 0.80 (0.70-0.91)               | ↑                                                                 | Strong                     |
|                               | 46,702  |                                           | Referral to treatment interval<br>[Within 62 days Y/N]     | (Derived)<br>LD OR 1.0<br>MD OR 1.02 (0.95-1.10)               | =                                                                 |                            |
|                               | 116,177 |                                           | Diagnosis to treatment interval<br>[Within 31 days Y/N]    | (Derived)<br>LD OR 1.0<br>MD OR 1.28 (1.14-1.44)               | ↓                                                                 |                            |
| <b>Hayes (2021)</b>           | 19,798  | Age   Site   Stage                        | Referral to first seen interval<br>[Within 2 weeks Y/N]    | LD OR 1.0<br>MD adjusted OR 0.95 (0.87,1.03)                   | =                                                                 | Strong                     |
|                               | 29,445  | Age   First Treatment   Sex  <br>Stage    | Diagnosis to treatment interval<br>[Within 31 days Y/N]    | LD OR 1.0<br>MD adjusted OR 0.91 (0.84,0.98)                   | ↑                                                                 |                            |
|                               | 17,622  | Age   First Treatment   Stage<br>  Others | Referral to treatment interval<br>[Within 62 days Y/N]     | LD OR 1.0<br>MD adjusted OR 0.82 (0.74,0.91)                   | ↑                                                                 |                            |
| <b>Lejeune<br/>(2010)</b>     | 71,917  | Age   Stage                               | Diagnosis to treatment interval<br>[Within 1 week Y/N]     | LD OR 1.0<br>MD adjusted OR 0.78 (0.72,0.84)                   | ↑                                                                 | Moderate                   |
|                               |         |                                           | Diagnosis to treatment interval<br>[Within 1 month Y/N]    | LD OR 1.0<br>MD adjusted OR 0.84 (0.78,0.90)                   | ↑                                                                 |                            |
|                               |         |                                           | Diagnosis to treatment interval<br>[Within 2-3 months Y/N] | LD OR 1.0<br>MD adjusted OR 0.91 (0.85,0.98)                   | ↑                                                                 |                            |
|                               |         |                                           | Diagnosis to treatment interval<br>[Within 4-6 months Y/N] | LD OR 1.0<br>MD adjusted OR 1.07 (0.96,1.18)                   | =                                                                 |                            |

Appendix S8: Results of studies reporting variations in the system interval - CONTINUED

| First Author<br>(Year) | Number  | Adjusted for                                                                           | Outcome of Interest                                                                                      | Odds ratio (95% CI) or other<br>measure                                              | Effect of deprivation<br>on interval length<br>[Longer↑ Shorter↓] | Strength<br>of<br>Evidence |
|------------------------|---------|----------------------------------------------------------------------------------------|----------------------------------------------------------------------------------------------------------|--------------------------------------------------------------------------------------|-------------------------------------------------------------------|----------------------------|
| Neal (2005)            | 15,891  | Age   Ethnicity   Marital<br>Status   Sex                                              | Symptom to diagnosis interval                                                                            | Generalised linear modelling<br>Nonsignificant result                                | =                                                                 | Weak                       |
|                        |         |                                                                                        | Referral to first seen interval                                                                          | Generalised linear modelling<br>Nonsignificant result                                | =                                                                 |                            |
|                        |         |                                                                                        | First seen to diagnosis interval                                                                         | Generalised linear modelling<br>F(7) = 2.247, p=0.028                                | o                                                                 |                            |
| Paterson<br>(2014)     | 4,915   | Unadjusted                                                                             | Referral to treatment interval<br>[Within 62 days Y/N]                                                   | (Derived)<br>LD OR 1.0<br>MD OR 1.14 (0.93-1.39)                                     | =                                                                 | Weak                       |
| Pearson<br>(2019)      | 63,958  | Age   Comorbidities  <br>Ethnicity   Investigations  <br>Presentation   Sex   Stage    | Secondary care diagnostic interval<br>[Interval longer than the median Y/N]                              | LD OR 1.0<br>MD adjusted OR 1.07 (1.00,1.13)                                         | =                                                                 | Strong                     |
| Price (2020)           | Unknown | Age   Sex   Time Period                                                                | First presentation to diagnosis<br>interval                                                              | Pre-post difference-in-differences<br>MD coef 0.1<br>(-0.03,0.2, p=0.147)            | =                                                                 | Strong                     |
|                        |         |                                                                                        |                                                                                                          | Event-study difference-in-<br>differences<br>MD coef 0.069<br>(0.002,0.136, p=0.043) | ↑                                                                 |                            |
|                        |         |                                                                                        |                                                                                                          | Semiparametric varying-coefficient<br>analyses<br>Significant association            | ↑                                                                 |                            |
| Redanial<br>(2014)     | 46,511  | Age   Ethnicity   Grade  <br>Morphology   Region   Sex  <br>Site   Stage   Time Period | Diagnosis to Treatment Interval<br>[Amongst patients who had a<br>resection within 62 days of diagnosis] | Linear Regression<br>LD coef 0.00<br>MD adj coef 0.21<br>(-0.55,0.98)                | =                                                                 | Strong                     |

### Appendix S8: Results of studies reporting variations in the system interval - CONTINUED

| First Author<br>(Year)     | Number | Adjusted for                                                                                              | Outcome of Interest                                                                                                         | Odds ratio (95% CI) or other<br>measure                                                          | Effect of deprivation<br>on interval length<br>[Longer↑ Shorter↓] | Strength<br>of<br>Evidence |
|----------------------------|--------|-----------------------------------------------------------------------------------------------------------|-----------------------------------------------------------------------------------------------------------------------------|--------------------------------------------------------------------------------------------------|-------------------------------------------------------------------|----------------------------|
| <b>Saito (2021)</b><br>[2] | 28,452 | Age   Comorbidities   Grade<br>  Morphology   Presentation  <br>Sex   Site   Stage   Year of<br>Diagnosis | Diagnosis to Treatment Interval<br>[Time from diagnosis to major<br>resection amongst patients who had<br>elective surgery] | Linear Regression<br>LD adjusted coefficient 1.00<br>MD adjusted coefficient 0.99<br>(0.97,1.02) | =                                                                 | Strong                     |

Abbreviations: Adj adjusted, C colon, Coef coefficient, GP general practitioner, LD least deprived, MD most deprived, R rectal, Ref reference group.

\*Results also presented for the 75<sup>th</sup> centile

†The reference group was men aged 55 to 64 years old in the least deprived group with no recorded comorbidities or mental health morbidities and who had rectal bleeding or a change in bowel habit.

#### Legend

|                        |                        |                                            |                                    |
|------------------------|------------------------|--------------------------------------------|------------------------------------|
| ↑ Increased likelihood | ↓ Decreased likelihood | = No significant difference between groups | ° Significant association observed |
|------------------------|------------------------|--------------------------------------------|------------------------------------|

Appendix S9: Results – Likelihood of receipt of surgery

| First Author (Year)     | Treatment Given Within                     | Number  | Adjusted for                                                                   | Outcome of Interest                                         | Odds Ratio /Likelihood               | 95% CI (p-value)       | Effect of Deprivation on Odds of Surgery | Strength of Evidence |
|-------------------------|--------------------------------------------|---------|--------------------------------------------------------------------------------|-------------------------------------------------------------|--------------------------------------|------------------------|------------------------------------------|----------------------|
| <b>Bharathan (2011)</b> | Not recorded                               | 8,159   | Unadjusted                                                                     | Receipt of surgery [NS] (assumed part of primary treatment) | (Derived)<br>LD OR 1.0<br>MD OR 0.71 | (Derived)<br>0.51-0.97 | ↓                                        | Weak                 |
| <b>Campbell (2002)</b>  | 1 year of diagnosis                        | 653     | Age   Distance   Stage                                                         | Receipt of surgery [NS] (assumed part of primary treatment) | LD OR 1.0<br>MD OR 0.52              | 0.14-1.87              | =                                        | Weak                 |
| <b>Fenton (2019)</b>    | 3 years of primary colorectal resection    | 157,383 | Age   Comorbidities   Sex   Site   Liver Centre   Stage   Year of Resection    | Receipt of Liver Resection                                  | LD OR 1.0<br>MD OR 0.76              | 0.70-0.83              | ↓                                        | Strong               |
| <b>Fenton (2021)</b>    | 3 years of primary colorectal resection    | 80,869  | Age   Comorbidities   Sex   Site   Thoracic Centre   Stage   Year of Resection | Receipt of Pulmonary Resection                              | LD OR 1.0<br>MD OR 1.04              | 0.89-1.22              | =                                        | Strong               |
| <b>Harris (2009)</b>    | Received during the study period (assumed) | 477     | Unadjusted                                                                     | Receipt of surgery [NS] (assumed part of primary treatment) | (Derived)<br>LD OR 1.0<br>MD OR 0.32 | (Derived)<br>0.13-0.72 | ↓                                        | Weak                 |
| <b>Hayes (2019)</b>     | 12 months of diagnosis (assumed)           | 31,910  | Age   Comorbidities   Sex   Stage   Year of Diagnosis                          | Receipt of surgery [NS] (assumed part of primary treatment) | LD OR 1.0<br>MD OR 0.62              | 0.55-0.70              | ↓                                        | Strong               |



## Appendix S9: Results – Likelihood of receipt of surgery - CONTINUED

| First Author<br>(Year) | Treatment<br>Given Within                               | Number    | Adjusted for                                                       | Outcome of Interest                                               | Odds Ratio<br>/Likelihood                       | 95% CI<br>(p-value)       | Effect of<br>Deprivation on<br>Odds of Surgery | Strength of<br>Evidence |
|------------------------|---------------------------------------------------------|-----------|--------------------------------------------------------------------|-------------------------------------------------------------------|-------------------------------------------------|---------------------------|------------------------------------------------|-------------------------|
| <b>Jones (2008)</b>    | Received during<br>the study period<br>(assumed)        | C: 16,850 | Age   Sex   Stage  <br>Time to Hospital                            | Receipt of surgery [NS]<br>(assumed part of<br>primary treatment) | C: OR 0.99<br>(for a 1 unit<br>increase in IMD) | C: 0.99-1.0               | ↓                                              | Weak                    |
|                        |                                                         | R: 11,406 |                                                                    |                                                                   | R: OR 0.99<br>(for a 1 unit<br>increase in IMD) | R: 0.98-0.99              | ↓                                              |                         |
| <b>Morris (2010)</b>   | 3 years of<br>primary<br>colorectal<br>resection        | 114,155   | Age   Comorbidities  <br>Sex   Site   Stage  <br>Year of Resection | Receipt of Liver<br>Resection                                     | LD OR 1.0<br>MD OR 0.70                         | 0.61-0.80                 | ↓                                              | Strong                  |
| <b>NCIN (2011)</b>     | 30 days before<br>diagnosis to 6<br>months after        | 80,690    | Unadjusted                                                         | Receipt of major<br>resection                                     | (Derived)<br>LD OR 1.0<br>MD OR 0.84            | (Derived)<br>0.80-0.88    | ↓                                              | Weak                    |
| <b>NCRAS (2018)</b>    | C: 30 days<br>before diagnosis<br>to 6 months<br>after  | 75,552    | Unadjusted                                                         | Receipt of major<br>resection                                     | C: (Derived)<br>LD OR 1.0<br>MD OR 0.76         | C: (Derived)<br>0.72-0.80 | ↓                                              | Moderate                |
|                        | R: 30 days<br>before diagnosis<br>to 12 months<br>after | 28,136    |                                                                    |                                                                   | R: (Derived)<br>LD OR 1.0<br>MD OR 0.66         | R: (Derived)<br>0.61-0.72 | ↓                                              |                         |
| <b>Paterson (2014)</b> | Not recorded                                            | 4,915     | Age   Region   Sex  <br>Site   Stage                               | Receipt of surgery [NS]<br>(assumed part of<br>primary treatment) | LD OR 1.23<br>MD OR 1.0                         | 0.96-1.58                 | =                                              | Weak                    |

Appendix S9: Results – Likelihood of receipt of surgery - CONTINUED

| First Author (Year)               | Treatment Given Within                     | Number           | Adjusted for                                                                                    | Outcome of Interest                                                                                             | Odds Ratio /Likelihood     | 95% CI (p-value) | Effect of Deprivation on Odds of Surgery | Strength of Evidence |
|-----------------------------------|--------------------------------------------|------------------|-------------------------------------------------------------------------------------------------|-----------------------------------------------------------------------------------------------------------------|----------------------------|------------------|------------------------------------------|----------------------|
| <b>Pollock and Vickers (1998)</b> | Received during the study period           | 25,304 (assumed) | Age   Sex                                                                                       | Finished consultant episode that included therapeutic or palliative surgery (assumed part of primary treatment) | LD OR 1.0<br>MD OR 0.88    | 0.78-1.00        | =                                        | Weak                 |
| <b>Saito (2019) [1]</b>           | 30 days before diagnosis to 180 days after | C: 38,624        | Age   Comorbidities   Grade   Histology   Presentation   Sex   Site   Stage   Year of Diagnosis | Receipt of major resection<br>[Odds of <i>not</i> receiving major surgery]                                      | C: LD OR 1.0<br>MD OR 0.96 | C: 0.87-1.07     | =                                        | Strong               |
|                                   |                                            | R: 22,630        |                                                                                                 |                                                                                                                 | R: LD OR 1.0<br>MD OR 1.35 | R: 1.22-1.49     | ↓                                        |                      |
| <b>Shack (2009)</b>               | 6 months of diagnosis                      | 29,563           | Age   Comorbidities   Sex   Site   Stage                                                        | Receipt of major resection                                                                                      | LD OR 1.0<br>MD OR 1.63    | 1.17-2.26        | ↑                                        | Strong               |
| <b>Vallance (2018)</b>            | 1 year of CRC diagnosis                    | 13,656           | Age   Comorbidities   Presentation   Sex   Site   Liver Centre   Stage                          | Receipt of Liver Resection                                                                                      | LD OR 1.42<br>MD OR 1.0    | 1.18-1.70        | ↓                                        | Strong               |

Abbreviations: C colon cancer, CI confidence interval, CRC colorectal cancer, LD least deprived, MD most deprived, NS not specified, OR odds ratio, R rectal cancer.

Legend

|                        |                        |                                            |
|------------------------|------------------------|--------------------------------------------|
| ↑ Increased likelihood | ↓ Decreased likelihood | = No significant difference between groups |
|------------------------|------------------------|--------------------------------------------|

Appendix S10: Likelihood of surgical variation - forest plot

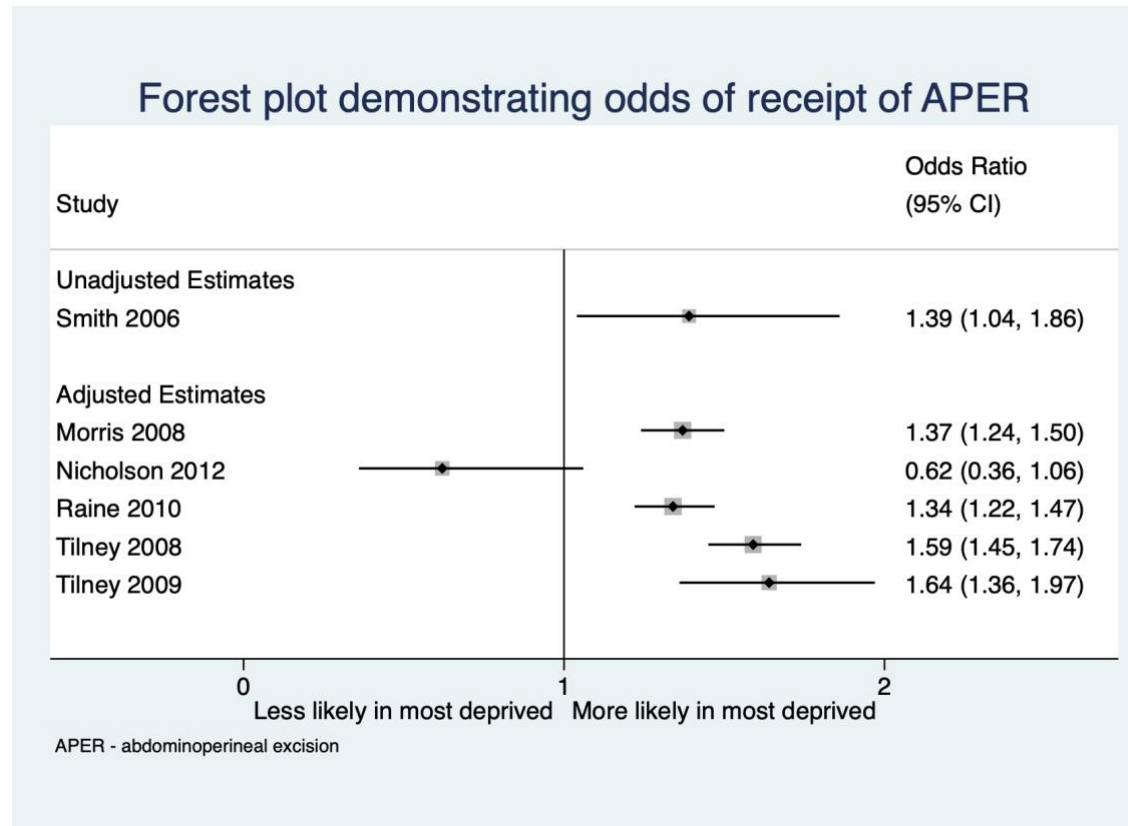

Forest plot demonstrating the odds of receipt of abdominoperineal excision of the rectum versus anterior resection in the most deprived versus the least deprived patient group.

Appendix S11: Results – Likelihood of surgical variation

| First Author (Year) | Number | Adjusted for                                                                     | Outcome of Interest                                      | Odds Ratio /Likelihood               | 95% CI (p-value)       | Effect of Deprivation on Odds of APER vs AR unless otherwise stated | Strength of Evidence |
|---------------------|--------|----------------------------------------------------------------------------------|----------------------------------------------------------|--------------------------------------|------------------------|---------------------------------------------------------------------|----------------------|
| Morris (2008)       | 26,097 | Age   Sex   Year of Diagnosis   Stage   Surgeon Workload   Presentation          | Abdominoperineal Excision vs Anterior Resection          | LD OR 1.0<br>MD OR 1.37              | 1.24-1.50              | ↑                                                                   | Strong               |
| Nicholson (2012)    | 1,574  | Age   Stage   Sex   Surgeon Workload   Presentation   Year of Diagnosis   Others | Abdominoperineal Excision vs Anterior Resection          | LD OR 1.0<br>MD OR 0.62              | 0.36-1.06              | =                                                                   | Weak                 |
| Radwan (2016)       | 120    | Unadjusted                                                                       | Total Pelvic Exenteration vs Partial Pelvic Exenteration | (Derived)<br>LD OR 1.0<br>MD OR 1.75 | (Derived)<br>0.55-5.68 | =<br>[odds of TPE]                                                  | Weak                 |
| Raine (2010)        | 29,214 | Age   Presentation   Sex   Year of Resection                                     | Anterior Resection vs Abdominoperineal Excision          | LD OR 1.34<br>MD OR 1.0              | 1.22-1.47              | ↑                                                                   | Weak                 |
| Smith (2006)        | 2,389  | Unadjusted                                                                       | Abdominoperineal Excision vs Anterior Resection          | (Derived)<br>LD OR 1.0<br>MD OR 1.39 | (Derived)<br>1.04-1.86 | ↑                                                                   | Weak                 |
| Tilney (2008)       | 52,643 | Age   Presentation   Sex   Year of Resection                                     | Abdominoperineal Excision vs Anterior Resection          | LD OR 1.0<br>MD OR 1.59              | 1.45-1.74              | ↑                                                                   | Weak                 |
| Tilney (2009)       | 12,128 | Neoadjuvant Therapy   Sex   Year                                                 | Abdominoperineal Excision vs Anterior Resection          | LD OR 1.0<br>MD OR 1.64              | 1.36-1.97              | ↑                                                                   | Weak                 |

Abbreviations: APER Abdominoperineal Excision, AR Anterior Resection, CI confidence interval, LD least deprived, MD most deprived, OR odds ratio, TPE Total Pelvic Exenteration.

Legend

|                        |                        |                                            |
|------------------------|------------------------|--------------------------------------------|
| ↑ Increased likelihood | ↓ Decreased likelihood | = No significant difference between groups |
|------------------------|------------------------|--------------------------------------------|

Appendix S12: Likelihood of receipt of chemotherapy – forest plot

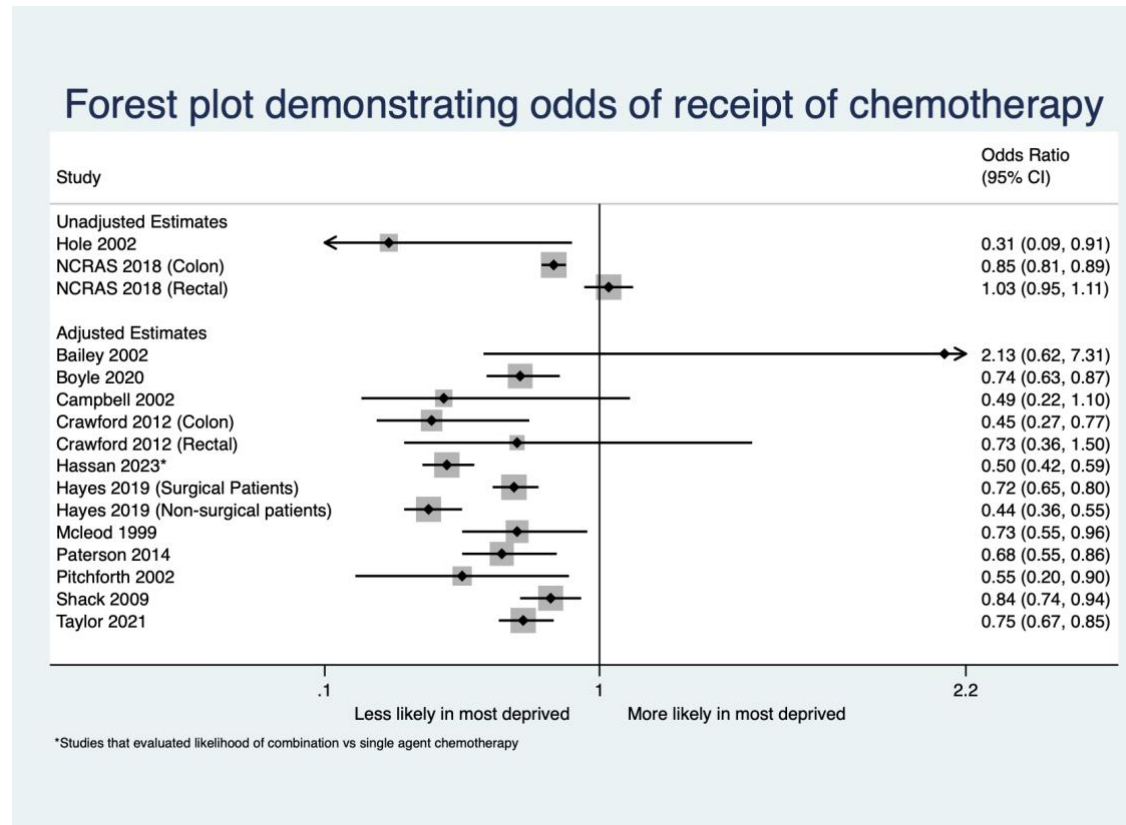

Forest plot demonstrating the odds of receipt of chemotherapy in the most deprived versus the least deprived patient group.

Appendix S13: Results – Likelihood of receipt of chemotherapy

| First Author (Year) | Treatment Given Within           | Number  | Adjusted for                                                                      | Outcome of Interest                                 | Odds Ratio /Likelihood                                                    | 95% CI (p-value) | Effect of Deprivation on Odds of Chemotherapy | Strength of Evidence |
|---------------------|----------------------------------|---------|-----------------------------------------------------------------------------------|-----------------------------------------------------|---------------------------------------------------------------------------|------------------|-----------------------------------------------|----------------------|
| Bailey (2002)       | Not recorded                     | 119     | Age   Social Resources Rating                                                     | Receipt of adjuvant chemotherapy                    | Excellent/good economic resources OR 1.0<br>Mild/total impairment OR 2.13 | 0.62-7.31        | =                                             | Weak                 |
| Boyle (2020)        | 4 months of surgery              | 11,932  | Access   Age   ASA   Comorbidities   Fitness   Readmission   Sex   Stage   Others | Receipt of adjuvant chemotherapy                    | LD OR 1.36<br>MD OR 1.0                                                   | 1.15-1.60        | ↓                                             | Strong               |
| Campbell (2002)     | 1 year of diagnosis              | 653     | Age   Distance   Presentation   Region   Stage                                    | Receipt of chemotherapy                             | LD OR 1.0<br>MD OR 0.49                                                   | 0.22-1.10        | =                                             | Weak                 |
| Crawford (2012)     | 6 months of diagnosis            | Unknown | Age   Sex   Stage                                                                 | Receipt of chemotherapy in stage IV disease         | C: LD OR 1.0<br>MD OR 0.45                                                | C: 0.27-0.77     | ↓                                             | Weak                 |
|                     |                                  |         |                                                                                   |                                                     | R: LD OR 1.0<br>MD OR 0.73                                                | R: 0.36-1.50     | =                                             |                      |
| Hassan (2023)       | 4 months of surgery              | 8,750   | Age   Ethnicity   No. nodes   Sex   Size   Year of Diagnosis                      | Receipt of combination vs single agent chemotherapy | LD OR 1.0<br>MD OR 0.50                                                   | 0.42-0.59        | ↓                                             | Strong               |
| Hayes (2019)        | 12 months of diagnosis (assumed) | 24,263  | Age   Comorbidities   Sex   Stage   Year of Diagnosis                             | Chemotherapy in surgical patients                   | LD OR 1.0<br>MD OR 0.72                                                   | 0.65-0.80        | ↓                                             | Strong               |
|                     |                                  | 7,647   |                                                                                   | Chemotherapy in non-surgical patients               | LD OR 1.0<br>MD OR 0.44                                                   | 0.36-0.55        | ↓                                             |                      |

## Appendix S13: Results – Likelihood of receipt of chemotherapy - CONTINUED

| First Author<br>(Year) | Treatment<br>Given Within                         | Number    | Adjusted for                                                                                | Outcome of Interest                                       | Odds Ratio<br>/Likelihood                       | 95% CI<br>(p-value)    | Effect of<br>Deprivation on<br>Odds of<br>Chemotherapy | Strength<br>of<br>Evidence |
|------------------------|---------------------------------------------------|-----------|---------------------------------------------------------------------------------------------|-----------------------------------------------------------|-------------------------------------------------|------------------------|--------------------------------------------------------|----------------------------|
| <b>Hole (2002)</b>     | Received during<br>the study period<br>(assumed)  | 2,269     | Unadjusted                                                                                  | Receipt of adjuvant<br>therapy (presumed<br>chemotherapy) | (Derived)<br>LD OR 1.0<br>MD OR 0.31            | (Derived)<br>0.09-0.91 | ↓                                                      | Weak                       |
| <b>Jones (2008)</b>    | Received during<br>the study period<br>(assumed)  | C: 16,850 | Age   Sex   Stage  <br>Time to Hospital                                                     | Receipt of<br>chemotherapy                                | C: OR 0.99<br>(for a 1 unit increase in<br>IMD) | C: 0.98-0.99           | ↓                                                      | Weak                       |
|                        |                                                   | R: 11,406 |                                                                                             |                                                           | R: OR 0.99<br>(for a 1 unit increase in<br>IMD) | R: 0.99-1.0            | ↓                                                      |                            |
| <b>McLeod (1999)</b>   | 6 months from<br>the first<br>admission           | 7,852     | Age   Comorbidities  <br>Death   Marital Status  <br>Presentation   Rural  <br>Sex   Others | Receipt of<br>chemotherapy                                | LD OR 1.0<br>MD OR 0.73                         | 0.55-0.96              | ↓                                                      | Weak                       |
| <b>NCRAS (2018)</b>    | 31 days before<br>diagnosis to 12<br>months after | C: 75,552 | Unadjusted                                                                                  | Receipt of<br>chemotherapy                                | C: (Derived)<br>LD OR 1.0<br>MD OR 0.85         | 0.81-0.89              | ↓                                                      | Moderate                   |
|                        |                                                   | R: 28,136 |                                                                                             |                                                           | R: (Derived)<br>LD OR 1.0<br>MD OR 1.03         | 0.95-1.11              | =                                                      |                            |
| <b>Paterson (2014)</b> | Not recorded                                      | 4,915     | Age   Metastatic<br>Disease   Region   Sex<br>  Site                                        | Receipt of<br>chemotherapy                                | LD OR 1.46<br>MD OR 1.0                         | 1.16-1.83              | ↓                                                      | Weak                       |

Appendix S13: Results – Likelihood of receipt of chemotherapy - CONTINUED

| First Author (Year) | Treatment Given Within            | Number | Adjusted for                                                             | Outcome of Interest              | Odds Ratio /Likelihood  | 95% CI (p-value) | Effect of Deprivation on Odds of Chemotherapy | Strength of Evidence |
|---------------------|-----------------------------------|--------|--------------------------------------------------------------------------|----------------------------------|-------------------------|------------------|-----------------------------------------------|----------------------|
| Pitchforth (2002)   | 6 months from the first admission | 7,303  | Age   Comorbidities   Death   Presentation   Rural   Sex   Cancer Centre | Receipt of chemotherapy          | LD OR 1.0<br>MD OR 0.55 | 0.20-0.90        | ↓                                             | Weak                 |
| Shack (2009)        | 6 months of diagnosis             | 29,563 | Age   Comorbidities   Sex   Site   Stage                                 | Receipt of chemotherapy          | LD OR 1.0<br>MD OR 0.84 | 0.74-0.94        | ↓                                             | Strong               |
| Taylor (2021)       | 6 months of surgery               | 23,402 | Age   Comorbidities   Sex   Stage                                        | Receipt of adjuvant chemotherapy | LD OR 1.0<br>MD OR 0.75 | 0.67-0.85        | ↓                                             | Strong               |

Abbreviations: ASA American Society of Anaesthesiologists grade, CI confidence interval, C colon, LD least deprived, MD most deprived, OR odds ratio, R rectum.

Legend

|                        |                        |                                            |
|------------------------|------------------------|--------------------------------------------|
| ↑ Increased likelihood | ↓ Decreased likelihood | = No significant difference between groups |
|------------------------|------------------------|--------------------------------------------|



Appendix S14: Likelihood of receipt of radiotherapy – forest plot

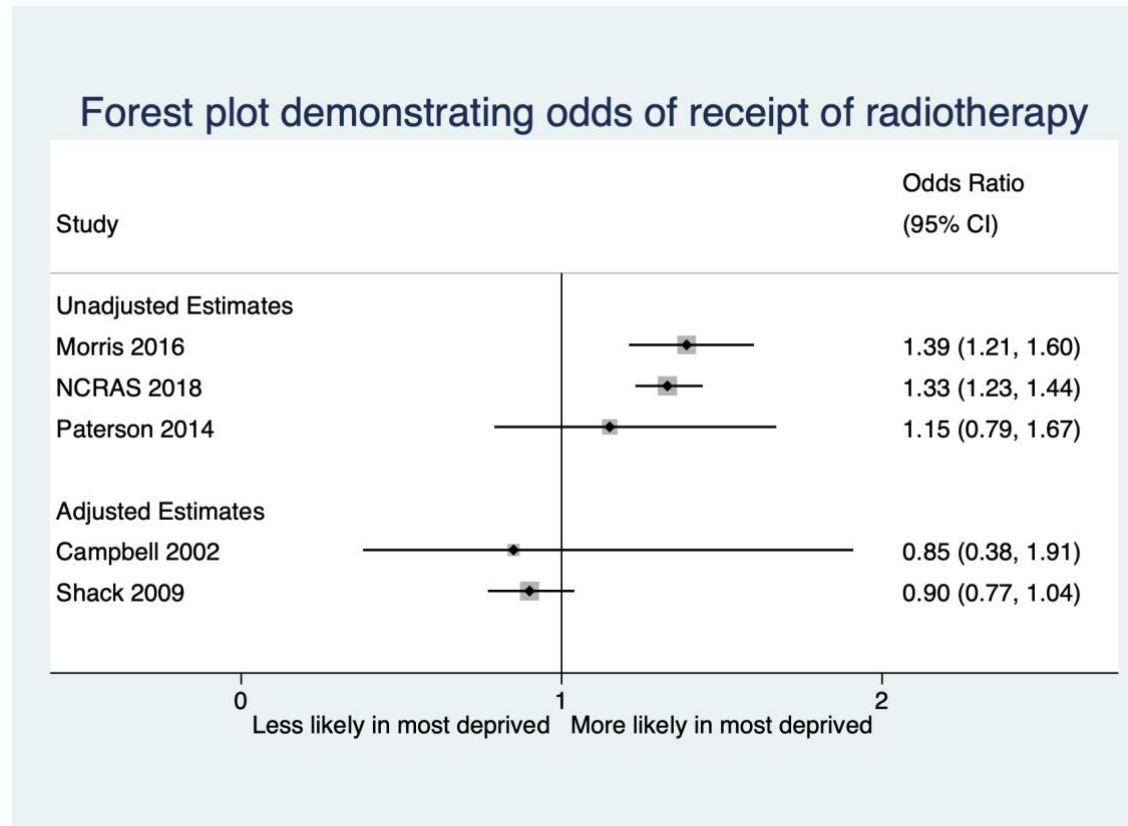

Forest plot demonstrating the odds of receipt of radiotherapy in the most deprived versus the least deprived patient group.

Appendix S15: Results – Likelihood of receipt of radiotherapy

| First Author (Year)    | Treatment Given Within                      | Number | Adjusted for                         | Outcome of Interest                            | Odds Ratio /Likelihood                    | 95% CI (p-value)       | Effect of Deprivation on Odds of Radiotherapy | Strength of Evidence |
|------------------------|---------------------------------------------|--------|--------------------------------------|------------------------------------------------|-------------------------------------------|------------------------|-----------------------------------------------|----------------------|
| <b>Campbell (2002)</b> | 1 year of diagnosis                         | 653    | Age   Distance   Site   Stage        | Receipt of radiotherapy                        | LD OR 1.0<br>MD OR 0.85                   | 0.38-1.91              | =                                             | Weak                 |
| <b>Jones (2008)</b>    | Received during the study period (assumed)  | 11,406 | Age   Sex   Stage   Time to Hospital | Receipt of radiotherapy (rectal cancer cohort) | OR 0.99<br>(for a 1 unit increase in IMD) | 0.99-1.0               | =                                             | Weak                 |
| <b>Morris (2016)</b>   | 1 year of surgery                           | 9,201  | Unadjusted                           | Receipt of radiotherapy                        | (Derived)<br>LD OR 1.0<br>MD OR 1.39      | (Derived)<br>1.21-1.60 | ↑                                             | Weak                 |
| <b>NCRAS (2018)</b>    | 31 days before diagnosis to 12 months after | 28,136 | Unadjusted                           | Receipt of radiotherapy                        | (Derived)<br>LD OR 1.0<br>MD OR 1.33      | (Derived)<br>1.23-1.44 | ↑                                             | Moderate             |
| <b>Paterson (2014)</b> | Not recorded                                | 1,345  | Unadjusted                           | Receipt of neoadjuvant radiotherapy            | (Derived)<br>LD OR 1.0<br>MD OR 1.15      | (Derived)<br>0.79-1.67 | =                                             | Weak                 |
| <b>Radwan (2016)</b>   | Received during the study period (assumed)  | 120    | Unadjusted                           | Receipt of neoadjuvant chemoradiotherapy       | (Derived)<br>LD OR 1.0<br>MD OR 1.0       | N/A                    | =                                             | Weak                 |
| <b>Shack (2009)</b>    | 6 months of diagnosis                       | 29,563 | Age   Comorbidities   Sex   Stage    | Receipt of radiotherapy                        | LD OR 1.0<br>MD OR 0.90                   | 0.77-1.04              | =                                             | Strong               |

Abbreviations: CI confidence interval, LD least deprived, MD most deprived, OR odds ratio.

## Legend

|                        |                        |                                            |
|------------------------|------------------------|--------------------------------------------|
| ↑ Increased likelihood | ↓ Decreased likelihood | = No significant difference between groups |
|------------------------|------------------------|--------------------------------------------|

For peer review only

Appendix S16: Results – Likelihood of receipt of any treatment

| First Author (Year) | Treatment Given Within             | Number    | Adjusted for      | Outcome of Interest                                                        | Odds Ratio /Likelihood     | 95% CI (p-value) | Effect of Deprivation on Odds of Any Treatment | Strength of Evidence |
|---------------------|------------------------------------|-----------|-------------------|----------------------------------------------------------------------------|----------------------------|------------------|------------------------------------------------|----------------------|
| Crawford (2012)     | 6 months of diagnosis              | C: 11,163 | Age   Sex   Stage | Receipt of any treatment (chemotherapy, radiotherapy, surgery NS)          | C: LD OR 1.0<br>MD OR 0.54 | C: 0.39-0.76     | ↓                                              | Weak                 |
|                     |                                    | R: 7,058  |                   |                                                                            | R: LD OR 1.0<br>MD OR 0.54 | R: 0.34-0.84     | ↓                                              |                      |
| Lejeune (2010)      | 6 months of first contact with NHS | 71,917    | Age   Stage       | Receipt of any treatment (presumed surgery, chemotherapy, radiotherapy NS) | LD OR 1.0<br>MD OR 0.87    | 0.82-0.92        | ↓                                              | Moderate             |

Abbreviations: C colon, CI confidence interval, LD least deprived, MD most deprived, NHS National Health Service, NS not specified, OR odds ratio, R rectal.

Legend

|                        |                        |                                            |
|------------------------|------------------------|--------------------------------------------|
| ↑ Increased likelihood | ↓ Decreased likelihood | = No significant difference between groups |
|------------------------|------------------------|--------------------------------------------|

## References

- 1 Page, M. *et al.* The PRISMA 2020 statement: An updated guideline for reporting systematic reviews. In: (2020).
- 2 Bailey, C. *et al.* Treatment decisions in older patients with colorectal cancer: the role of age and multidimensional function. *European Journal of Cancer Care* **12**, 257-262 (2003).
- 3 Hayes, L. *et al.* Age-related inequalities in colon cancer treatment persist over time: a population-based analysis. *Journal of Epidemiology and Community Health* **73**, 34 (2019).
- 4 Hayes, L. *et al.* Age-related and socioeconomic inequalities in timeliness of referral and start of treatment in colorectal cancer: a population-based analysis. *Journal of Epidemiology and Community Health* **75**, 1 (2021).
- 5 Shack, L. *What factors influence socioeconomic inequalities in colorectal cancer survival? PhD Thesis.* PhD Thesis thesis, London School of Hygiene and Tropical Medicine, (2009).
- 6 Saito, M. K., Quaresma, M., Fowler, H., Majano, S. B. & Rachet, B. Exploring socioeconomic differences in surgery and in time to elective surgery for colon cancer in England: Population-based study. *Cancer Epidemiology* **71**, 101896 (2021).
- 7 Pollock, A. M. & Vickers, N. Deprivation and emergency admissions for cancers of colorectum, lung, and breast in south east England: ecological study. *BMJ* **317**, 245 (1998).
- 8 Jones, A. P. *et al.* Travel time to hospital and treatment for breast, colon, rectum, lung, ovary and prostate cancer. *European Journal of Cancer* **44**, 992-999 (2008).
- 9 Lejeune, C. *et al.* Socio-economic disparities in access to treatment and their impact on colorectal cancer survival. *International Journal of Epidemiology* **39**, 710-717 (2010).
- 10 Di Girolamo, C. *et al.* Can we assess Cancer Waiting Time targets with cancer survival? A population-based study of individually linked data from the National Cancer Waiting Times monitoring dataset in England, 2009-2013. *PLOS ONE* **13**, e0201288 (2018).
- 11 Price, S., Zhang, X. & Spencer, A. Measuring the impact of national guidelines: What methods can be used to uncover time-varying effects for healthcare evaluations? *Social Science & Medicine* **258**, 113021 (2020).
- 12 Neal, R. D. & Allgar, V. L. Sociodemographic factors and delays in the diagnosis of six cancers: analysis of data from the 'National Survey of NHS Patients: Cancer'. *British Journal of Cancer* **92**, 1971-1975 (2005).
- 13 Pearson, C. *et al.* Establishing population-based surveillance of diagnostic timeliness using linked cancer registry and administrative data for patients with colorectal and lung cancer. *Cancer Epidemiology* **61**, 111-118 (2019).
- 14 Morris, E. *et al.* Unacceptable variation in abdominoperineal excision rates for rectal cancer: time to intervene? *Gut* **57**, 1690 (2008).
- 15 Morris, E. J. *et al.* Surgical management and outcomes of colorectal cancer liver metastases. *British Journal of Surgery* **97**, 1110-1118 (2010).
- 16 Morris, E. J. A. *et al.* Wide Variation in the Use of Radiotherapy in the Management of Surgically Treated Rectal Cancer Across the English National Health Service. *Clinical Oncology* **28**, 522-531 (2016).

- 1  
2  
3  
4 17 Boyle, J. M. *et al.* Determinants of Variation in the Use of Adjuvant Chemotherapy for Stage III Colon Cancer in England. *Clinical Oncology* **32**, e135-e144 (2020).
- 5  
6 18 Crawford, S. M., Sauerzapf, V., Haynes, R., Forman, D. & Jones, A. P. Social and geographical factors affecting access to treatment of colorectal cancer: a cancer registry study. *BMJ Open* **2**, e000410 (2012).
- 7  
8  
9 19 Vallance, A. E. *et al.* Socioeconomic differences in selection for liver resection in metastatic colorectal cancer and the impact on survival. *European Journal of Surgical Oncology* **44**, 1588-1594 (2018).
- 10  
11  
12  
13 20 Fenton, H. M. *et al.* Variation in the Use of Resection for Colorectal Cancer Liver Metastases. *Ann Surg* **270**, 892-898 (2019).
- 14  
15  
16 21 Fenton, H. M. *et al.* National variation in pulmonary metastasectomy for colorectal cancer. *Colorectal Disease* **23**, 1306-1316 (2021).
- 17  
18 22 Taylor, J. C. *et al.* Addressing the variation in adjuvant chemotherapy treatment for colorectal cancer: Can a regional intervention promote national change? *International Journal of Cancer* **148**, 845-856 (2021).
- 19  
20  
21  
22 23 Bharathan, B. *et al.* Impact of deprivation on short- and long-term outcomes after colorectal cancer surgery. *British Journal of Surgery* **98**, 854-865 (2011).
- 23  
24 24 Harris, A. R. *et al.* Socioeconomic deprivation adversely affects survival of patients with rectal cancer. (2009).
- 25  
26  
27 25 Raine, R. *et al.* Social variations in access to hospital care for patients with colorectal, breast, and lung cancer between 1999 and 2006: retrospective analysis of hospital episode statistics. *BMJ* **340**, b5479 (2010).
- 28  
29  
30 26 Redaniel, M., Martin, R., Blazeby, J., Wade, J. & Jeffreys, M. The association of time between diagnosis and major resection with poorer colorectal cancer survival: a retrospective cohort study. *BMC Cancer* **14** (2014).
- 31  
32  
33  
34 27 Smith, J. J. *et al.* Social deprivation and outcomes in colorectal cancer. *British Journal of Surgery* **93**, 1123-1131 (2006).
- 35  
36  
37 28 Tilney, H. S. *et al.* A National Perspective on the Decline of Abdominoperineal Resection for Rectal Cancer. *Annals of Surgery* **247** (2008).
- 38  
39 29 Tilney, H. *et al.* The National Bowel Cancer Project: Social Deprivation Is an Independent Predictor of Nonrestorative Rectal Cancer Surgery. *Diseases of the Colon & Rectum* **52** (2009).
- 40  
41  
42  
43 30 Hassan, S., Miles, A., Rachet, B. & Morris, M. Variations in the Type of Adjuvant Chemotherapy Among Stage III Colon Cancer Patients in England. *Journal of Gastrointestinal Cancer* (2023).
- 44  
45  
46  
47 31 Saito, M. K. *Socioeconomic inequalities in colorectal cancer survival in England and Japan* PhD thesis, London School of Hygiene & Tropical Medicine, (2019).
- 48  
49 32 Benitez Majano, S. *et al.* Mental Health Morbidities and Time to Cancer Diagnosis Among Adults With Colon Cancer in England. *JAMA Network Open* **5**, e2238569-e2238569 (2022).
- 50  
51  
52  
53 33 Majano, S. B., Lyratzopoulos, G., Rachet, B., de Wit, N. J. & Renzi, C. Do presenting symptoms, use of pre-diagnostic endoscopy and risk of emergency cancer diagnosis vary by comorbidity burden and type in patients with colorectal cancer? *British Journal of Cancer* **126**, 652-663 (2022).
- 54  
55  
56  
57 34 Campbell, N. C. *et al.* Impact of deprivation and rural residence on treatment of colorectal and lung cancer. *British Journal of Cancer* **87**, 585-590 (2002).
- 58  
59  
60

- 1  
2  
3 35 Hole, D. & McArdle, C. Impact of socioeconomic deprivation on outcome after  
4 surgery for colorectal cancer. *Br J Surgery* **89**, 586-590 (2002).
- 5  
6 36 McLeod, A. Variation in the provision of chemotherapy for colorectal cancer. *Journal*  
7 *of Epidemiology and Community Health* **53**, 775 (1999).
- 8  
9 37 Paterson, H. M., Mander, B. J., Muir, P., Phillips, H. A. & Wild, S. H. Deprivation and  
10 access to treatment for colorectal cancer in southeast Scotland 2003–2009.  
11 *Colorectal Disease* **16**, O51-O57 (2014).
- 12  
13 38 Nicholson, G. A. *et al.* Quality of care in rectal cancer surgery. Exploring influencing  
14 factors in the West of Scotland. *Colorectal Disease* **14**, 731-739 (2012).
- 15  
16 39 Pitchforth, E., Russell, E. & Van der Pol, M. Access to specialist cancer care: is it  
17 equitable? *British Journal of Cancer* **87**, 1221-1226 (2002).
- 18  
19 40 Radwan, R. *et al.* Social deprivation in patients requiring pelvic exenterative surgery.  
20 *Colorectal Disease* **18**, 684-687 (2016).
- 21  
22 41 Haddaway, N., Grainger, M. & Gray, C. *citation chaser: An R package and Shiny app*  
23 *for forward and backward citations chasing in academic searching.*,  
24 <https://estech.shinyapps.io/citationchaser/> (2021).
- 25  
26 42 EndNote v. EndNote X9 (Clarivate, Philadelphia, PA, 2013).
- 27  
28 43 Afshar, N., English, D. & Milne, R. Explaining Socio-Economic Inequalities in Cancer  
29 Survival: A Systematic Review. *Cancer Control* **28** (2021).
- 30  
31 44 Woods, L. M., Rachet, B. & Coleman, M. P. Origins of socio-economic inequalities in  
32 cancer survival: a review. *Annals of Oncology* **17**, 5-19 (2006).
- 33  
34 45 Ayiku, L. *et al.* The medline UK filter: development and validation of a geographic  
35 search filter to retrieve research about the UK from OVID medline. *Health*  
36 *Information & Libraries Journal* **34**, 200-216 (2017).
- 37  
38 46 Ayiku, L. *et al.* The Embase UK filter: validation of a geographic search filter to  
39 retrieve research about the UK from OVID Embase. *Health Information & Libraries*  
40 *Journal* **36**, 121-133 (2019).
- 41  
42 47 McGowan, J. *et al.* PRESS Peer Review of Electronic Search Strategies: 2015  
43 Guideline Statement. *Journal of Clinical Epidemiology* **75**, 40-46 (2016).
- 44  
45 48 Forrest, L. F., Adams, J., Wareham, H., Rubin, G. & White, M. Socioeconomic  
46 Inequalities in Lung Cancer Treatment: Systematic Review and Meta-Analysis. *PLOS*  
47 *Medicine* **10**, e1001376 (2013).
- 48  
49 49 Forrest, L. F., Sowden, S., Rubin, G., White, M. & Adams, J. Socio-economic  
50 inequalities in stage at diagnosis, and in time intervals on the lung cancer pathway  
51 from first symptom to treatment: systematic review and meta-analysis. *Thorax* **72**,  
52 430 (2017).
- 53  
54 50 Prady, S. L., Uphoff, E. P., Power, M. & Golder, S. Development and validation of a  
55 search filter to identify equity-focused studies: reducing the number needed to  
56 screen. *BMC medical research methodology* **18**, 106-106 (2018).
- 57  
58 51 Public Health England Knowledge and Library Services. *Finding the Evidence: Health*  
59 *inequalities, equality and diversity*,  
60 <https://cash.libraryservices.nhs.uk/search/?q=finding+the+evidence> Accessed March  
2023, (2016).
- 52  
53 52 Hosking, J., Macmillan, A., Jones, R., Ameratunga, S. & Woodward, A. Searching for  
54 health equity: validation of a search filter for ethnic and socioeconomic inequalities  
55 in transport. *Systematic reviews* **8**, 94-94 (2019).

- 1  
2  
3 53 Grossetta Nardini, H. & Wang, L. *The Yale MeSH Analyzer* <http://mesh.med.yale.edu/>  
4 Accessed August 2022, (2022).  
5  
6 54 Phillips, A. *et al.* Socioeconomic differences impact overall survival in advanced  
7 ovarian cancer (AOC) prior to achievement of standard therapy. *Archives of*  
8 *Gynecology and Obstetrics* **300**, 1261-1270 (2019).  
9  
10 55 Vallance, A. E. *et al.* Role of Emergency Laparoscopic Colectomy for Colorectal  
11 Cancer: A Population-based Study in England. *Ann Surg.* **270**, 172-179 (2019).  
12  
13 56 Byrne, B. E., Vincent, C. A. & Faiz, O. D. Inequalities in Implementation and Different  
14 Outcomes During the Growth of Laparoscopic Colorectal Cancer Surgery in England:  
15 A National Population-Based Study from 2002 to 2012. *World Journal of Surgery* **42**,  
16 3422-3431 (2018).  
17  
18 57 Walter, F. M. *et al.* Symptoms and patient factors associated with longer time to  
19 diagnosis for colorectal cancer: results from a prospective cohort study. *British*  
20 *journal of cancer* **115**, 533-541 (2016).  
21  
22 58 Wiggins, M. G., Shahtahmasebi, G., Aroori, S., Bowles, M. J. & Stell, D. A.  
23 Socioeconomic status influences the likelihood but not the outcome of liver  
24 resection for colorectal liver metastasis. *HPB* **17**, 150-158 (2015).  
25  
26 59 Warwick, J. *et al.* Variation in colorectal cancer treatment and survival: a cohort  
27 study covering the East Anglia region. *Colorectal Disease* **15**, 1243-1252 (2013).  
28  
29 60 Oliphant, R. *et al.* Deprivation and Colorectal Cancer Surgery: Longer-Term Survival  
30 Inequalities are Due to Differential Postoperative Mortality Between Socioeconomic  
31 Groups. *Annals of Surgical Oncology* **20**, 2132-2139 (2013).  
32  
33 61 Askari, A. *et al.* The relationship between ethnicity, social deprivation and late  
34 presentation of colorectal cancer. In: Vol. 47 88-93 (Cancer Epidemiology, 2017).  
35  
36 62 Taylor, E. F. *et al.* Population-based study of laparoscopic colorectal cancer surgery  
37 2006-2008. *The British journal of surgery* **100**, 553-560 (2013).  
38  
39 63 Bramer, W. M., Giustini, D., de Jonge, G. B., Holland, L. & Bekhuis, T. De-duplication  
40 of database search results for systematic reviews in EndNote. *Journal of the Medical*  
41 *Library Association : JMLA* **104**, 240-243 (2016).  
42  
43 64 Veritas Health Innovation Melbourne Australia. *Covidence systematic review*  
44 *software*, [www.covidence.org](http://www.covidence.org). (2021).  
45  
46 65 Review Manager (RevMan) [Computer Program]. Version 5.4. (2020).  
47  
48  
49  
50  
51  
52  
53  
54  
55  
56  
57  
58  
59  
60
