# Supplementary material for: Where are the inequalities in colorectal cancer care in a country with universal healthcare? A systematic review and narrative synthesis
Source: PubMed Central journal article supplement — BMJ Open. 2024 Jan 3;14(1):e080467. doi: 10.1136/bmjopen-2023-080467 (PMC10773363; doi:10.1136/bmjopen-2023-080467), 2024-01-03
Supplement: bmjopen-2023-080467supp001.pdf [file bmjopen-2023-080467supp001.pdf]

## **Where are the inequalities in colorectal cancer care in a country with universal healthcare? A systematic review and narrative synthesis**

### **Appendix**

Benjamin Pickwell-Smith, Katie Spencer, Mahboobeh Haji Sadeghi, Sarah Greenley, Mike Lind, Una Macleod

#### *Contents*

Appendix S1: PRISMA Statement Checklist – Page 2-4

Appendix S2: List of Hand-Searched Sources and Details of Citation Searches – Page 5

Appendix S3: Search Strategies – Page 6-31

- Appendix S3.1 – MEDLINE – Page 6-8
- Appendix S3.2 – EMBASE – Page 9-11
- Appendix S3.3 – PsycINFO – Page 12-14
- Appendix S3.4 – AMED – Page 15-16
- Appendix S3.5 – HMIC- Page 17-18
- Appendix S3.6 – CENTRAL – Page 19-21
- Appendix S3.7 – Science Citation Index Expanded – Page 22-25
- Appendix S3.8 – CINAHL – Page 26-30
- Appendix S3.9 – Others – Page 31

Appendix S4: Development and Validation of the Search and Record Management – Page 32

Appendix S5: Data Items and Effect Measures – Page 33

Appendix S6: Study Risk of Bias Assessment – Page 34-36

Appendix S7: Characteristics of Included Studies – Page 37-42

Appendix S8: Results – Association between Socioeconomic Status and the System Interval – Page 43-46

Appendix S9: Results – Likelihood of Receipt of Surgery – Page 47-49

Appendix S10: Likelihood of surgical variation - forest plot – Page 50

Appendix S11: Results – Likelihood of Surgical Variation – Page 51

Appendix S12: Likelihood of receipt of chemotherapy – forest plot – Page 52

Appendix S13: Results – Likelihood of Receipt of Chemotherapy – Page 53-55

Appendix S14: Likelihood of receipt of radiotherapy – forest plot – Page 56

Appendix S15: Results – Likelihood of Receipt of Radiotherapy – Page 57-58

Appendix S16: Results – Likelihood of Receipt of Any Treatment – Page 59

References – Page 60-63

**Appendix S1: PRISMA Statement Checklist<sup>1</sup>**

| Section/topic           | Item # | Checklist item                                                                                                                                                                                                                                                                                       | Reported on page # |
|-------------------------|--------|------------------------------------------------------------------------------------------------------------------------------------------------------------------------------------------------------------------------------------------------------------------------------------------------------|--------------------|
| <b>TITLE</b>            |        |                                                                                                                                                                                                                                                                                                      |                    |
| Title                   | 1      | Identify the report as a systematic review.                                                                                                                                                                                                                                                          | 1                  |
| <b>ABSTRACT</b>         |        |                                                                                                                                                                                                                                                                                                      |                    |
| Abstract                | 2      | As per PRISMA 2020 for Abstracts checklist                                                                                                                                                                                                                                                           | 2-3                |
| <b>INTRODUCTION</b>     |        |                                                                                                                                                                                                                                                                                                      |                    |
| Rationale               | 3      | Describe the rationale for the review in the context of what is already known.                                                                                                                                                                                                                       | 4-5                |
| Objectives              | 4      | Provide an explicit statement of the objective(s) or question(s) the review addresses.                                                                                                                                                                                                               | 5                  |
| <b>METHODS</b>          |        |                                                                                                                                                                                                                                                                                                      |                    |
| Eligibility criteria    | 5      | Specify the inclusion and exclusion criteria for the review and how studies were grouped for the syntheses.                                                                                                                                                                                          | 5-6                |
| Information sources     | 6      | Specify all databases, registers, websites, organisations, reference lists and other sources searched or consulted to identify studies. Specify the date when each source was last searched or consulted.                                                                                            | 6, Appendix S2     |
| Search strategy         | 7      | Present the full search strategies for all databases, registers, and websites, including any filters and limits used.                                                                                                                                                                                | Appendix S3        |
| Study selection         | 8      | Specify the methods used to decide whether a study met the inclusion criteria of the review, including how many reviewers screened each record and each report retrieved, whether they worked independently, and if applicable, details of automation tools used in the process.                     | 6                  |
| Data collection process | 9      | Specify the methods used to collect data from reports, including how many reviewers collected data from each report, whether they worked independently, any processes for obtaining or confirming data from study investigators, and if applicable, details of automation tools used in the process. | 6                  |
| Data items              | 10a    | List and define all outcomes for which data were sought. Specify whether all results that were compatible with each outcome domain in each study were sought (e.g. for all measures, time points, analyses), and if not, the methods used to decide which results to collect.                        | Appendix S5        |
|                         | 10b    | List and define all other variables for which data were sought (e.g. participant and intervention characteristics, funding sources). Describe any assumptions made about any missing or unclear information.                                                                                         | Appendix S5        |

|                               |     |                                                                                                                                                                                                                                                                   |                          |
|-------------------------------|-----|-------------------------------------------------------------------------------------------------------------------------------------------------------------------------------------------------------------------------------------------------------------------|--------------------------|
| Study risk of bias assessment | 11  | Specify the methods used to assess risk of bias in the included studies, including details of the tool(s) used, how many reviewers assessed each study and whether they worked independently, and if applicable, details of automation tools used in the process. | 7                        |
| Effect measures               | 12  | Specify for each outcome the effect measure(s) (e.g. risk ratio, mean difference) used in the synthesis or presentation of results.                                                                                                                               | Appendix S5              |
| Synthesis methods             | 13a | Describe the processes used to decide which studies were eligible for each synthesis (e.g. tabulating the study intervention characteristics and comparing against the planned groups for each synthesis (item #5)).                                              | 7                        |
|                               | 13b | Describe any methods required to prepare the data for presentation or synthesis, such as handling of missing summary statistics, or data conversions.                                                                                                             | Appendix S5              |
|                               | 13c | Describe any methods used to tabulate or visually display results of individual studies and syntheses.                                                                                                                                                            | Appendix S5              |
|                               | 13d | Describe any methods used to synthesize results and provide a rationale for the choice(s). If meta-analysis was performed, describe the model(s), method(s) to identify the presence and extent of statistical heterogeneity, and software package(s) used.       | 7                        |
|                               | 13e | Describe any methods used to explore possible causes of heterogeneity among study results (e.g. subgroup analysis, meta-regression).                                                                                                                              | N/A                      |
|                               | 13f | Describe any sensitivity analyses conducted to assess robustness of the synthesized results.                                                                                                                                                                      | N/A                      |
| Reporting bias assessment     | 14  | Describe any methods used to assess risk of bias due to missing results in a synthesis (arising from reporting biases).                                                                                                                                           | N/A                      |
| Certainty assessment          | 15  | Describe any methods used to assess certainty (or confidence) in the body of evidence for an outcome.                                                                                                                                                             | 7                        |
| <b>RESULTS</b>                |     |                                                                                                                                                                                                                                                                   |                          |
| Study selection               | 16a | Describe the results of the search and selection process, from the number of records identified in the search to the number of studies included in the review, ideally using a flow diagram.                                                                      | 8, Figure 1              |
|                               | 16b | Cite studies that might appear to meet the inclusion criteria, but which were excluded, and explain why they were excluded.                                                                                                                                       | N/A                      |
| Study characteristics         | 17  | Cite each included study and present its characteristics.                                                                                                                                                                                                         | 8, Figure 2, Appendix S7 |
| Risk of bias within studies   | 18  | Present assessments of risk of bias for each included study.                                                                                                                                                                                                      | 8, Figure 3, Appendix S6 |
| Results of individual         | 19  | For all outcomes, present, for each study: (a) summary statistics for each group (where appropriate) and                                                                                                                                                          | 8-15, Appendix S8-       |

|                                                |     |                                                                                                                                                                                                                                                                                      |                          |
|------------------------------------------------|-----|--------------------------------------------------------------------------------------------------------------------------------------------------------------------------------------------------------------------------------------------------------------------------------------|--------------------------|
| studies                                        |     | (b) an effect estimate and its precision (e.g. confidence/credible interval), ideally using structured tables or plots.                                                                                                                                                              | S13                      |
| Results of syntheses                           | 20a | For each synthesis, briefly summarise the characteristics and risk of bias among contributing studies.                                                                                                                                                                               | 8, Figure 3, Appendix S6 |
|                                                | 20b | Present results of all statistical syntheses conducted. If meta-analysis was done, present for each the summary estimate and its precision (e.g. confidence/credible interval) and measures of statistical heterogeneity. If comparing groups, describe the direction of the effect. | 8-15, Appendix S8-S13    |
|                                                | 20c | Present results of all investigations of possible causes of heterogeneity among study results.                                                                                                                                                                                       | N/A                      |
|                                                | 20d | Present results of all sensitivity analyses conducted to assess the robustness of the synthesized results.                                                                                                                                                                           | N/A                      |
| Reporting biases                               | 21  | Present assessments of risk of bias due to missing results (arising from reporting biases) for each synthesis assessed.                                                                                                                                                              | N/A                      |
| Certainty of evidence                          | 22  | Present assessments of certainty (or confidence) in the body of evidence for each outcome assessed.                                                                                                                                                                                  | 8-15, Table 1            |
| <b>DISCUSSION</b>                              |     |                                                                                                                                                                                                                                                                                      |                          |
| Discussion                                     | 23a | Provide a general interpretation of the results in the context of other evidence.                                                                                                                                                                                                    | 18-22                    |
|                                                | 23b | Discuss any limitations of the evidence included in the review.                                                                                                                                                                                                                      | 18-22                    |
|                                                | 23c | Discuss any limitations of the review processes used.                                                                                                                                                                                                                                | 18-22                    |
|                                                | 23d | Discuss implications of the results for practice, policy, and future research.                                                                                                                                                                                                       | 18-22                    |
| <b>Other Information</b>                       |     |                                                                                                                                                                                                                                                                                      |                          |
| Registration and protocol                      | 24a | Provide registration information for the review, including register name and registration number, or state that the review was not registered.                                                                                                                                       | 2, 5                     |
|                                                | 24b | Indicate where the review protocol can be accessed, or state that a protocol was not prepared.                                                                                                                                                                                       | 5                        |
|                                                | 24c | Describe and explain any amendments to information provided at registration or in the protocol.                                                                                                                                                                                      | N/A                      |
| Support                                        | 25  | Describe sources of financial or non-financial support for the review, and the role of the funders or sponsors in the review.                                                                                                                                                        | 3,4                      |
| Competing interests                            | 26  | Declare any competing interests of review authors.                                                                                                                                                                                                                                   | 23                       |
| Availability of data, code and other materials | 27  | Report which of the following are publicly available and where they can be found: template data collection forms; data extracted from included studies; data used for all analyses; analytic code; any other materials used in the review.                                           | 23                       |

## Appendix S2: List of Hand-Searched Online Sources and Details of Citation Searches

The following websites were hand-searched on 30/03/2023:

- The National Cancer Registration and Analysis Service (<http://www.ncin.org.uk/home>)
- Cancer Research UK (<https://www.cancerresearchuk.org/>)
- Macmillan Cancer Support (<https://www.macmillan.org.uk>)
- The King's Fund (<https://www.kingsfund.org.uk/>)
- Office for Health Improvement and Disparities (<https://www.gov.uk/government/organisations/office-for-health-improvement-and-disparities>)
- National Bowel Cancer Audit (<https://www.nboca.org.uk>)
- Bowel Cancer UK (<https://www.bowelcanceruk.org.uk>)
- National Health Service England (<https://www.england.nhs.uk/about/equality/equality-hub/>)
- The Association of Coloproctology of Great Britain & Ireland (<https://www.acpgbi.org.uk>)
- NHS Digital (<https://digital.nhs.uk>)
- Health Data Insight CIC (<https://healthdatainsight.org.uk>)
- National Disease Registration Service (<https://www.ndrs.nhs.uk>)

The automated tool 'citationchaser' conducted forward and backward citation searches on thirty-nine included studies where a digital object identifier was available.<sup>2-40</sup>

These searches identified 838 unique records using backwards searching and 1,628 unique records using forwards searching.<sup>41</sup> These records were then screened by BPS in EndNote X9.<sup>42</sup>

The bibliographies of two systematic reviews were also examined for relevant articles.<sup>43,44</sup>

### Appendix S3.1: Search Strategies – MEDLINE (OVID)

Initial searches were conducted on 31<sup>st</sup> August 2021. Repeat searches were conducted across all databases on 26/01/2023, limited to date of database entry between 20/08/2021 to 26/01/2023.

#### Ovid MEDLINE(R) ALL <1946 to August 31, 2021>

```
1      exp Colorectal Neoplasms/
2      ((colon* or colorectal or rectal) adj3 (cancer* or neoplas* or tumor* or tumour* or
malignan* or carcinoma* or metasta* or oncolog*)).mp
3      or/1-2 [cancer population of interest]
4      exp Socioeconomic Factors/
5      (socio-economic or socioeconomic or socio-demographic or sociodemographic).mp
6      exp Education, Continuing/ or Education/
7      exp Income/
8      exp Health Status/
9      exp Poverty/
10     (socio-economic position or socioeconomic position).mp.
11     inequalities.mp.
12     exp Social Environment/
13     social factors.mp.
14     income.mp.
15     exp Residence Characteristics/
16     Social class.mp.
17     Education.mp.
18     exp Health Status Disparities/
19     depriv*.mp.
20     (equity or equitable).mp.
21     (inequity or inequitable).mp.
22     inequities.mp.
23     disparit*.mp.
24     or/4-23 [inequality concept]
25     surgery.mp.
26     Treatment.mp.
27     exp Health Services Accessibility/
28     exp Healthcare Disparities/
29     treatment disparities.mp.
30     exp "Delivery of Health Care"/
31     exp Primary Health Care/
32     exp Drug Therapy/
33     chemotherapy.mp.
34     Radiotherapy/ or Radiotherapy, Adjuvant/
35     radiotherapy.mp.
36     accessibility.mp.
```

37 access.mp.  
38 pattern\$.mp.  
39 palliative care/ or Patient care/ or Primary Health care/  
40 care.mp.  
41 investigation.mp.  
42 exp "Quality of Health Care"/  
43 exp Patient Selection/ or exp Eligibility Determination/  
44 exp "Referral and Consultation"/  
45 Receipt.mp. or exp "Patient Acceptance of Health Care"/  
46 Provision.mp.  
47 Attendance.mp.  
48 25 or 26 or 27 or 28 or 29 or 30 or 31 or 32 or 33 or 34 or 35 or 36 or 37 or 38 or 39  
or 40 or 41 or 42 or 43 or 44 or 45 or 46 or 47 [treatment concept]  
49 exp "Early Detection of Cancer"/  
50 exp Delayed Diagnosis/  
51 ((patient\* or present\* or doctor\* or physician\* or practitioner\* or hospital\* or  
system\* or (primary adj care) or (secondary adj care) or total or (help adj3 seek) or pre-  
treatment\* or referr\* or specialist\* or consultant\* or surg\* or chemothera\* or radiothera\*  
or treatment\* or diagnos\*) adj5 (delay\* or interval\* or time\* or pathway\* or route\*)).ti,ab.  
52 (stage\* adj5 (diagnosis or diagnostic)).ti,ab.  
53 49 or 50 or 51 or 52 [interval filter]  
54 exp United Kingdom/  
55 (national health service\* or NHS\*).ti,ab,in.  
56 (english not ((published or publication\* or translat\* or written or language\* or  
speak\* or literature or citation\*) adj5 english)).ti,ab.  
57 (gb or "g.b." or britain\* or (british\* not "british columbia") or uk or "u.k." or united  
kingdom\* or (england\* not "new england") or northern ireland\* or northern irish\* or  
scotland\* or scottish\* or ((wales or "south wales") not "new south wales") or  
welsh\*).ti,ab,jw,in.  
58 (bath or "bath's" or ((birmingham not alabama\*) or ("birmingham's" not alabama\*)  
or bradford or "bradford's" or brighton or "brighton's" or bristol or "bristol's" or carlisle\* or  
"carlisle's" or (cambridge not (massachusetts\* or boston\* or harvard\*)) or ("cambridge's"  
not (massachusetts\* or boston\* or harvard\*)) or (canterbury not zealand\*) or  
("canterbury's" not zealand\*) or chelmsford or "chelmsford's" or chester or "chester's" or  
chichester or "chichester's" or coventry or "coventry's" or derby or "derby's" or (durham not  
(carolina\* or nc)) or ("durham's" not (carolina\* or nc)) or ely or "ely's" or exeter or  
"exeter's" or gloucester or "gloucester's" or hereford or "hereford's" or hull or "hull's" or  
lancaster or "lancaster's" or leeds\* or leicester or "leicester's" or (lincoln not nebraska\*) or  
("lincoln's" not nebraska\*) or (liverpool not (new south wales\* or nsw)) or ("liverpool's" not  
(new south wales\* or nsw)) or ((london not (ontario\* or ont or toronto\*)) or ("london's" not  
(ontario\* or ont or toronto\*)) or manchester or "manchester's" or (newcastle not (new  
south wales\* or nsw)) or ("newcastle's" not (new south wales\* or nsw)) or norwich or  
"norwich's" or nottingham or "nottingham's" or oxford or "oxford's" or peterborough or  
"peterborough's" or plymouth or "plymouth's" or portsmouth or "portsmouth's" or preston  
or "preston's" or ripon or "ripon's" or salford or "salford's" or salisbury or "salisbury's" or  
sheffield or "sheffield's" or southampton or "southampton's" or st albans or stoke or  
"stoke's" or sunderland or "sunderland's" or truro or "truro's" or wakefield or "wakefield's"

or wells or westminster or "westminster's" or winchester or "winchester's" or wolverhampton or "wolverhampton's" or (worchester not (massachusetts\* or boston\* or harvard\*)) or ("worchester's" not (massachusetts\* or boston\* or harvard\*)) or (york not ("new york\*" or ny or ontario\* or ont or toronto\*)) or ("york's" not ("new york\*" or ny or ontario\* or ont or toronto\*))))).ti,ab,in.

59 (bangor or "bangor's" or cardiff or "cardiff's" or newport or "newport's" or st asaph or "st asaph's" or st davids or swansea or "swansea's").ti,ab,in.

60 (aberdeen or "aberdeen's" or dundee or "dundee's" or edinburgh or "edinburgh's" or glasgow or "glasgow's" or inverness or (perth not australia\*) or ("perth's" not australia\*) or stirling or "stirling's").ti,ab,in.

61 (armagh or "armagh's" or belfast or "belfast's" or lisburn or "lisburn's" or londonderry or "londonderry's" or derry or "derry's" or newry or "newry's").ti,ab,in.

62 54 or 55 or 56 or 57 or 58 or 59 or 60 or 61

63 (exp africa/ or exp americas/ or exp Antarctic regions/ or exp arctic regions/ or exp asia/ or exp oceania/) not (exp great britain/ or europe/)

64 62 not 63 [NICE UK filter]

65 case reports.pt.

66 news.pt.

67 letter.pt.

68 comment.pt.

69 exp animals/ not humans.sh.

70 65 or 66 or 67 or 68 or 69 [excluding animals and unwanted publication types]

71 3 and 24 and 48

72 3 and 24 and 53

73 71 or 72

74 64 and 73

75 74 not 70



## Appendix S3.2: Search Strategies – EMBASE (OVID)

### OVID Embase <1974 to 2021 August 31>

- 1 exp colorectal tumor/
- 2 ((colon\* or colorectal or rectal) adj3 (cancer\* or neoplas\* or tumor\* or tumour\* or malignan\* or carcinoma\* or metasta\* or oncolog\*)).mp.
- 3 1 or 2 [cancer population of interest]
- 4 exp socioeconomics/
- 5 (socio-economic or socioeconomic or socio-demographic or sociodemographic).mp.
- 6 exp education/
- 7 exp income/
- 8 exp health status/
- 9 exp poverty/
- 10 (socioeconomic position or socio-economic position).mp.
- 11 inequalities.mp.
- 12 exp social environment/
- 13 social factors.mp.
- 14 income.mp.
- 15 exp demography/
- 16 social class.mp.
- 17 education.mp.
- 18 exp health disparity/
- 19 depriv\*.mp.
- 20 (equity or equitable).mp.
- 21 (inequity or inequitable).mp.
- 22 inequities.mp.
- 23 disparit\*.mp.
- 24 4 or 5 or 6 or 7 or 8 or 9 or 10 or 11 or 12 or 13 or 14 or 15 or 16 or 17 or 18 or 19 or 20 or 21 or 22 or 23 or 23 [inequality concept]
- 25 surgery.mp.
- 26 treatment.mp.
- 27 exp health care access/
- 28 exp health care disparity/
- 29 treatment disparities.mp.
- 30 exp health care delivery/
- 31 exp primary health care/
- 32 exp drug therapy/
- 33 chemotherapy.mp.
- 34 adjuvant radiotherapy/ or radiotherapy/
- 35 radiotherapy.mp.
- 36 accessibility.mp.
- 37 access.mp.
- 38 pattern\*.mp.
- 39 palliative therapy/ or patient care/ or primary health care/
- 40 care.mp.
- 41 investigation.mp.

42 exp health care quality/  
43 exp patient selection/99092  
44 exp patient referral/ or exp consultation/  
45 receipt.mp. or exp "Patient attitude"/  
46 provision.mp.  
47 attendance.mp.  
48 25 or 26 or 27 or 28 or 29 or 30 or 31 or 32 or 33 or 34 or 35 or 36 or 37 or 38 or 39  
or 40 or 41 or 42 or 43 or 44 or 45 or 46 or 47 [treatment concept]  
49 exp early cancer diagnosis/  
50 exp delayed diagnosis/  
51 ((patient\* or present\* or doctor\* or physician\* or practitioner\* or hospital\* or  
system\* or (primary adj care) or (secondary adj care) or total or (help adj3 seek) or pre-  
treatment\* or refer\* or specialist\* or consultant\* or surg\* or chemothera\* or radiothera\*  
or treatment\* or diagnos\*) adj5 (delay\* or interval\* or time\* or pathway\* or route\*)).ti,ab.  
52 (stage\* adj5 (diagnosis or diagnostic)).ti,ab.  
53 49 or 50 or 51 or 52 [interval filter]  
54 exp United Kingdom/  
55 (national health service\* or nhs\*).ti,ab,in,ad.  
56 (english not ((published or publication\* or translat\* or written or language\* or  
speak\* or literature or citation\*) adj5 english)).ti,ab.  
57 (gb or "g.b." or britain\* or (british\* not "british columbia") or uk or "u.k." or united  
kingdom\* or (england\* not "new england") or northern ireland\* or northern irish\* or  
scotland\* or scottish\* or ((wales or "south wales") not "new south wales") or  
welsh\*).ti,ab,jx,in,ad.  
58 (bath or "bath's" or ((birmingham not alabama\*) or ("birmingham's" not alabama\*)  
or bradford or "bradford's" or brighton or "brighton's" or bristol or "bristol's" or carlisle\* or  
"carlisle's" or (cambridge not (massachusetts\* or boston\* or harvard\*)) or ("cambridge's"  
not (massachusetts\* or boston\* or harvard\*)) or (canterbury not zealand\*) or  
("canterbury's" not zealand\*) or chelmsford or "chelmsford's" or chester or "chester's" or  
chichester or "chichester's" or coventry or "coventry's" or derby or "derby's" or (durham not  
(carolina\* or nc)) or ("durham's" not (carolina\* or nc)) or ely or "ely's" or exeter or  
"exeter's" or gloucester or "gloucester's" or hereford or "hereford's" or hull or "hull's" or  
lancaster or "lancaster's" or leeds\* or leicester or "leicester's" or (lincoln not nebraska\*) or  
("lincoln's" not nebraska\*) or (liverpool not (new south wales\* or nsw)) or ("liverpool's" not  
(new south wales\* or nsw)) or ((london not (ontario\* or ont or toronto\*)) or ("london's" not  
(ontario\* or ont or toronto\*)) or manchester or "manchester's" or (newcastle not (new  
south wales\* or nsw)) or ("newcastle's" not (new south wales\* or nsw)) or norwich or  
"norwich's" or nottingham or "nottingham's" or oxford or "oxford's" or peterborough or  
"peterborough's" or plymouth or "plymouth's" or portsmouth or "portsmouth's" or preston  
or "preston's" or ripon or "ripon's" or salford or "salford's" or salisbury or "salisbury's" or  
sheffield or "sheffield's" or southampton or "southampton's" or st albans or stoke or  
"stoke's" or sunderland or "sunderland's" or truro or "truro's" or wakefield or "wakefield's"  
or wells or westminster or "westminster's" or winchester or "winchester's" or  
wolverhampton or "wolverhampton's" or (worcester not (massachusetts\* or boston\* or  
harvard\*)) or ("worcester's" not (massachusetts\* or boston\* or harvard\*)) or (york not  
("new york\*" or ny or ontario\* or ont or toronto\*)) or ("york's" not ("new york\*" or ny or  
ontario\* or ont or toronto\*))))).ti,ab,in,ad.

- 59 (bangor or "bangor's" or cardiff or "cardiff's" or newport or "newport's" or st asaph or "st asaph's" or st davids or swansea or "swansea's").ti,ab,in,ad.
- 60 (aberdeen or "aberdeen's" or dundee or "dundee's" or edinburgh or "edinburgh's" or glasgow or "glasgow's" or inverness or (perth not australia\*) or ("perth's" not australia\*) or stirling or "stirling's").ti,ab,in,ad.
- 61 (armagh or "armagh's" or belfast or "belfast's" or lisburn or "lisburn's" or londonderry or "londonderry's" or derry or "derry's" or newry or "newry's").ti,ab,in,ad.
- 62 54 or 55 or 56 or 57 or 58 or 59 or 60 or 61
- 63 (exp "arctic and antarctic"/ or exp oceanic regions/ or exp western hemisphere/ or exp africa/ or exp asia/ or exp "australia and new zealand"/) not (exp united kingdom/ or europe/)
- 64 62 not 63 [NICE UK Filter]
- 65 letter.pt.
- 66 (animal\* not human\*).sh,hw.
- 67 65 or 66 [excluding animals and unwanted publication types]
- 68 3 and 24 and 48
- 69 3 and 24 and 53
- 70 68 or 69
- 71 64 and 70
- 72 71 not 67
- 73 limit 72 to conference abstract status
- 74 limit 73 to dd=20200831-20210831
- 75 72 not 73
- 76 74 or 75

### Appendix S3.3: Search Strategies – PsycINFO (OVID)

#### OVID APA Psycinfo <1806 to August Week 4 2021>

1 ((colon\* or colorectal or rectal) adj3 (cancer\* or neoplas\* or tumor\* or tumour\* or malignan\* or carcinoma\* or metasta\* or oncolog\*)).af. [cancer population of interest]  
2 exp Socioeconomic Factors/  
3 (socio-economic or socioeconomic or socio-demographic or sociodemographic).af.  
4 exp Education/  
5 exp Income Level/ or exp "Income (Economic)"/  
6 exp Health Status/  
7 exp Poverty/  
8 (socio-economic position or socioeconomic position).af.  
9 inequalities.af.  
10 exp Social Environments/  
11 social factors.af.  
12 income.af.  
13 exp Neighborhoods/ or exp Urban Environments/ or exp Housing/  
14 social class.af.  
15 education.af.  
16 exp Health Disparities/  
17 depriv\*.af.  
18 (equity or equitable).af.  
19 (inequity or inequitable).af.  
20 inequities.af.  
21 disparit\*.af.  
22 2 or 3 or 4 or 5 or 6 or 7 or 8 or 9 or 10 or 11 or 12 or 13 or 14 or 15 or 16 or 17 or 18  
or 19 or 20 or 21 [inequality concept]  
23 surgery.af.  
24 Treatment.af.  
25 exp Health Care Utilization/ or exp Health Care Delivery/ or exp Health Care Access/  
or exp Treatment Barriers/  
26 treatment disparities.af.  
27 exp Health Care Services/  
28 exp Primary Health Care/  
29 exp Drug Therapy/  
30 chemotherapy.af.  
31 exp Radiation Therapy/  
32 exp Chemotherapy/  
33 radiotherapy.af.  
34 accessibility.af.  
35 access.af.  
36 pattern\$.af.  
37 exp Palliative Care/  
38 care.af.  
39 investigation.af.  
40 exp "Quality of Care"/ or exp "Quality of Services"/

- 41 exp Patient Selection/  
42 exp Decision Making/  
43 receipt.af.  
44 provision.af.  
45 attendance.af.  
46 23 or 24 or 25 or 26 or 27 or 28 or 29 or 30 or 31 or 32 or 33 or 34 or 35 or 36 or 37  
or 38 or 39 or 40 or 41 or 42 or 43 or 44 or 45 [treatment concept]  
47 ((patient\* or present\* or doctor\* or physician\* or practitioner\* or hospital\* or  
system\* or (primary adj care) or (secondary adj care) or total or (help adj3 seek) or pre-  
treatment\* or referr\* or specialist\* or consultant\* or surg\* or chemothera\* or radiothera\*  
or treatment\* or diagnos\*) adj5 (delay\* or interval\* or time\* or pathway\* or route\*)).ti,ab.  
48 (stage\* adj5 (diagnosis or diagnostic)).ti,ab.  
49 47 or 48 [interval concept]  
50 (national health service\* or NHS\*).ti,ab,in.  
51 (english not ((published or publication\* or translat\* or written or language\* or  
speak\* or literature or citation\*) adj5 english)).ti,ab.  
52 (gb or "g.b." or britain\* or (british\* not "british columbia") or uk or "u.k." or united  
kingdom\* or (england\* not "new england") or northern ireland\* or northern irish\* or  
scotland\* or scottish\* or ((wales or "south wales") not "new south wales") or  
welsh\*).ti,ab,jx,in.  
53 (bath or "bath's" or ((birmingham not alabama\*) or ("birmingham's" not alabama\*)  
or bradford or "bradford's" or brighton or "brighton's" or bristol or "bristol's" or carlisle\* or  
"carlisle's" or (cambridge not (massachusetts\* or boston\* or harvard\*)) or ("cambridge's"  
not (massachusetts\* or boston\* or harvard\*)) or (canterbury not zealand\*) or  
("canterbury's" not zealand\*) or chelmsford or "chelmsford's" or chester or "chester's" or  
chichester or "chichester's" or coventry or "coventry's" or derby or "derby's" or (durham not  
(carolina\* or nc)) or ("durham's" not (carolina\* or nc)) or ely or "ely's" or exeter or  
"exeter's" or gloucester or "gloucester's" or hereford or "hereford's" or hull or "hull's" or  
lancaster or "lancaster's" or leeds\* or leicester or "leicester's" or (lincoln not nebraska\*) or  
("lincoln's" not nebraska\*) or (liverpool not (new south wales\* or nsw)) or ("liverpool's" not  
(new south wales\* or nsw)) or ((london not (ontario\* or ont or toronto\*)) or ("london's" not  
(ontario\* or ont or toronto\*)) or manchester or "manchester's" or (newcastle not (new  
south wales\* or nsw)) or ("newcastle's" not (new south wales\* or nsw)) or norwich or  
"norwich's" or nottingham or "nottingham's" or oxford or "oxford's" or peterborough or  
"peterborough's" or plymouth or "plymouth's" or portsmouth or "portsmouth's" or preston  
or "preston's" or ripon or "ripon's" or salford or "salford's" or salisbury or "salisbury's" or  
sheffield or "sheffield's" or southampton or "southampton's" or st albans or stoke or  
"stoke's" or sunderland or "sunderland's" or truro or "truro's" or wakefield or "wakefield's"  
or wells or westminster or "westminster's" or winchester or "winchester's" or  
wolverhampton or "wolverhampton's" or (worcester not (massachusetts\* or boston\* or  
harvard\*)) or ("worcester's" not (massachusetts\* or boston\* or harvard\*)) or (york not  
("new york\*" or ny or ontario\* or ont or toronto\*)) or ("york's" not ("new york\*" or ny or  
ontario\* or ont or toronto\*))))).ti,ab,in.  
54 (bangor or "bangor's" or cardiff or "cardiff's" or newport or "newport's" or st asaph  
or "st asaph's" or st davids or swansea or "swansea's").ti,ab,in.

- 55 (aberdeen or "aberdeen's" or dundee or "dundee's" or edinburgh or "edinburgh's" or glasgow or "glasgow's" or inverness or (perth not australia\*) or ("perth's" not australia\*) or stirling or "stirling's").ti,ab,in.
- 56 (armagh or "armagh's" or belfast or "belfast's" or lisburn or "lisburn's" or londonderry or "londonderry's" or derry or "derry's" or newry or "newry's").ti,ab,in.
- 57 50 or 51 or 52 or 53 or 54 or 55 or 56 [UK filter]
- 58 exp animals/ not humans.sh. [excluding animals]
- 59 1 and 22 and 46
- 60 1 and 22 and 49
- 61 59 or 60
- 62 57 and 61
- 63 62 not 58

### Appendix S3.4: Search Strategies – AMED (OVID)

#### AMED (Allied and Complementary Medicine) <1985 to August 2021>

1 exp Colorectal neoplasms/  
2 ((colon\* or colorectal or rectal) adj3 (cancer\* or neoplas\* or tumor\* or tumour\* or malignan\* or carcinoma\* or metasta\* or oncolog\*)).mp.  
3 1 or 2  
4 exp Socioeconomic factors/  
5 (socio-economic or socioeconomic or socio-demographic or sociodemographic).mp.  
6 exp education/  
7 exp Income/  
8 exp Health status/  
9 exp Poverty/  
10 (socio-economic position or socioeconomic position).mp.  
11 inequalities.mp.  
12 exp Social environment/  
13 social factors.mp.  
14 income.mp.  
15 exp Residence characteristics/  
16 Social class.mp.  
17 Education.mp.  
18 depriv\*.mp.  
19 (equity or equitable).mp.  
20 (inequity or inequitable).mp.  
21 inequities.mp.  
22 disparit\*.mp.  
23 4 or 5 or 6 or 7 or 8 or 9 or 10 or 11 or 12 or 13 or 14 or 15 or 16 or 17 or 18 or 19 or  
20 or 21 or 22  
24 surgery.mp.  
25 Treatment.mp.  
26 exp Health services accessibility/  
27 treatment disparities.mp.  
28 exp "Delivery of health care"/  
29 exp Primary health care/  
30 exp Drug therapy/  
31 chemotherapy.mp.  
32 exp Radiotherapy/  
33 radiotherapy.mp.  
34 accessibility.mp.  
35 access.mp.  
36 pattern\$.mp.  
37 exp palliative care/  
38 exp Patient care/  
39 care.mp.  
40 investigation.mp.  
41 exp "Quality of health care"/

42 exp Patient assessment/  
43 exp "Referral and consultation"/  
44 exp "Patient acceptance of health care"/  
45 receipt.mp.  
46 Provision.mp.  
47 Attendance.mp.  
48 24 or 25 or 26 or 27 or 28 or 29 or 30 or 31 or 32 or 33 or 34 or 35 or 36 or 37 or 38  
or 39 or 40 or 41 or 42 or 43 or 44 or 45 or 46 or 47  
49 ((patient\* or present\* or doctor\* or physician\* or practitioner\* or hospital\* or  
system\* or (primary adj care) or (secondary adj care) or total or (help adj3 seek) or pre-  
treatment\* or referr\* or specialist\* or consultant\* or surg\* or chemothera\* or radiothera\*  
or treatment\* or diagnos\*) adj5 (delay\* or interval\* or time\* or pathway\* or route\*)).ti,ab.  
50 (stage\* adj5 (diagnosis or diagnostic)).ti,ab.  
51 49 or 50  
52 3 and 23 and 48  
53 3 and 23 and 51  
54 52 or 53



### Appendix S3.5: Search Strategies – HMIC (OVID)

#### HMIC Health Management Information Consortium <1979 to August 2021>

1 exp Colorectal cancer/  
2 ((colon\* or colorectal or rectal) adj3 (cancer\* or neoplas\* or tumor\* or tumour\* or malignan\* or carcinoma\* or metasta\* or oncolog\*)).af..  
3 1 or 2  
4 exp Socioeconomic factors/  
5 (socio-economic or socioeconomic or socio-demographic or sociodemographic).af.  
6 exp education/  
7 exp Income/  
8 exp health status/  
9 exp Poverty/  
10 (socio-economic position or socioeconomic position).af.  
11 inequalities.af.  
12 exp Social conditions/  
13 social factors.af.  
14 income.af.  
15 social class.af.  
16 education.af.  
17 exp Health inequalities/  
18 depriv\*.af.  
19 (equity or equitable).af.  
20 (inequity or inequitable).af.  
21 inequities.af.  
22 disparit\*.af.  
23 4 or 5 or 6 or 7 or 8 or 9 or 10 or 11 or 12 or 13 or 14 or 15 or 16 or 17 or 18 or 19 or  
20 or 21 or 22  
24 surgery.af.  
25 treatment.af.  
26 exp Access to health services/  
27 treatment disparities.af.  
28 exp Service delivery/  
29 exp primary care/  
30 exp Drug therapy/  
31 chemotherapy.af.  
32 exp Radiotherapy/  
33 radiotherapy.af.  
34 accessibility.af.  
35 access.af.  
36 pattern\*.af.  
37 exp Palliative care/  
38 exp patient care/  
39 care.af.  
40 investigation.af.  
41 exp "Quality of patient care"/

42 exp Patient selection/  
43 exp Patient eligibility/  
44 exp Patient referral/  
45 receipt.af.  
46 provision.af.  
47 attendance.af.  
48 24 or 25 or 26 or 27 or 28 or 29 or 30 or 31 or 32 or 33 or 34 or 35 or 36 or 37 or 38  
or 39 or 40 or 41 or 42 or 43 or 44 or 45 or 46 or 47  
49 exp Early diagnosis/  
50 exp Patient waiting time/  
51 ((patient\* or present\* or doctor\* or physician\* or practitioner\* or hospital\* or  
system\* or (primary adj care) or (secondary adj care) or total or (help adj3 seek) or pre-  
treatment\* or referr\* or specialist\* or consultant\* or surg\* or chemothera\* or radiothera\*  
or treatment\* or diagnos\*) adj5 (delay\* or interval\* or time\* or pathway\* or route\*)).mp.  
52 (stage\* adj5 (diagnosis or diagnostic)).ti,ab.  
53 49 or 50 or 51 or 52  
54 3 and 23 and 48  
55 3 and 23 and 53  
56 54 or 55

## Appendix S3.6: Search Strategies – CENTRAL (The Cochrane Library)

**Search Name: CENTRAL Search**

**Last Saved: 01/09/2021 17:45:46**

ID Search

#1 MeSH descriptor: [Colorectal Neoplasms] explode all trees

#2 (((colon\* or colorectal or rectal) NEAR/3 (cancer\* or neoplas\* or tumor\* or tumour\* or malignan\* or carcinoma\* or metasta\* or oncolog\*))) :ti,ab,kw

#3 #1 or #2

#4 MeSH descriptor: [Socioeconomic Factors] explode all trees

#5 ((socio-economic or socioeconomic or socio-demographic or sociodemographic)) :ti,ab,kw

#6 MeSH descriptor: [Education] explode all trees

#7 MeSH descriptor: [Income] explode all trees

#8 MeSH descriptor: [Health Status] explode all trees

#9 MeSH descriptor: [Poverty] explode all trees

#10 ((socio-economic position or socioeconomic position)) :ti,ab,kw

#11 (inequalities) :ti,ab,kw

#12 MeSH descriptor: [Social Environment] explode all trees

#13 (social factors) :ti,ab,kw

#14 (income) :ti,ab,kw

#15 MeSH descriptor: [Residence Characteristics] explode all trees

#16 (Social class) :ti,ab,kw

#17 (education) :ti,ab,kw

#18 MeSH descriptor: [Health Status Disparities] explode all trees

#19 (Depriv\*) :ti,ab,kw

#20 ((equity or equitable)) :ti,ab,kw

#21 ((inequity or inequitable)) :ti,ab,kw

#22 (inequities) :ti,ab,kw

#23 (disparit\*) :ti,ab,kw

#24 #4 or #5 or #6 or #7 or #8 or #9 or #10 or #11 or #12 or #13 or #14 or #15 or #16 or #17 or #18 or #19 or #20 or #21 or #22 or #23

#25 (surgery) :ti,ab,kw

#26 (treatment) :ti,ab,kw

#27 MeSH descriptor: [Health Services Accessibility] explode all trees

#28 MeSH descriptor: [Healthcare Disparities] explode all trees

#29 (treatment disparities) :ti,ab,kw

#30 MeSH descriptor: [Delivery of Health Care] explode all trees

#31 MeSH descriptor: [Primary Health Care] explode all trees

#32 MeSH descriptor: [Drug Therapy] explode all trees

#33 (chemotherapy) :ti,ab,kw

#34 MeSH descriptor: [Radiotherapy] explode all trees

#35 (radiotherapy) :ti,ab,kw

#36 (accessibility) :ti,ab,kw

#37 (access) :ti,ab,kw

#38 (pattern\*) :ti,ab,kw

- #49 MeSH descriptor: [Patient Care] explode all trees
- #40 MeSH descriptor: [Palliative Care] explode all trees
- #41 MeSH descriptor: [Primary Health Care] explode all trees
- #42 (care or investigation):ti,ab,kw
- #43 MeSH descriptor: [Quality of Health Care] explode all trees
- #44 MeSH descriptor: [Patient Selection] explode all trees
- #45 MeSH descriptor: [Eligibility Determination] explode all trees
- #46 MeSH descriptor: [Referral and Consultation] explode all trees
- #47 MeSH descriptor: [Patient Acceptance of Health Care] explode all trees
- #48 (receipt or provision or attendance):ti,ab,kw
- #49 #25 or #26 or #27 or #28 or #29 or #30 or #31 or #32 or #33 or #34 or #35 or #36 or #37 or #38 or #39 or #40 or #41 or #42 or #43 or #44 or #45 or #46 or #47 or #48
- #50 MeSH descriptor: [Early Detection of Cancer] explode all trees
- #51 MeSH descriptor: [Delayed Diagnosis] explode all trees
- #52 (((patient\* or present\* or doctor\* or physician\* or practitioner\* or hospital\* or system\* or (primary NEAR/1 care) or (secondary NEAR/1 care) or total or (help NEAR/3 seek) or pre-treatment\* or referr\* or specialist\* or consultant\* or surg\* or chemothera\* or radiothera\* or treatment\* or diagnos\*) NEAR/5 (delay\* or interval\* or time\* or pathway\* or route\*)):ti,ab,kw
- #53 ((stage\* NEAR/5 (diagnosis or diagnostic)):ti,ab,kw
- #54 #50 or #51 or #52 or #53
- #55 MeSH descriptor: [United Kingdom] explode all trees
- #56 ((national health service\* or NHS\*)):ti,ab,kw
- #57 ((english not ((published or publication\* or translat\* or written or language\* or speak\* or literature or citation\*) NEAR/5 english)):ti,ab,kw
- #58 ((gb or "g.b." or britain\* or (british\* not "british columbia") or uk or "u.k." or united kingdom\* or (england\* not "new england") or northern ireland\* or northern irish\* or scotland\* or scottish\* or ((wales or "south wales") not "new south wales") or welsh\*)):ti,ab,kw
- #59 ((bath or "bath's" or ((birmingham not alabama\*) or ("birmingham's" not alabama\*) or bradford or "bradford's" or brighton or "brighton's" or bristol or "bristol's" or carlisle\* or "carlisle's" or (cambridge not (massachusetts\* or boston\* or harvard\*)) or ("cambridge's" not (massachusetts\* or boston\* or harvard\*)) or (canterbury not zealand\*) or ("canterbury's" not zealand\*) or chelmsford or "chelmsford's" or chester or "chester's" or chichester or "chichester's" or coventry or "coventry's" or derby or "derby's" or (durham not (carolina\* or nc)) or ("durham's" not (carolina\* or nc)) or ely or "ely's" or exeter or "exeter's" or gloucester or "gloucester's" or hereford or "hereford's" or hull or "hull's" or lancaster or "lancaster's" or leeds\* or leicester or "leicester's" or (lincoln not nebraska\*) or ("lincoln's" not nebraska\*) or (liverpool not (new south wales\* or nsw)) or ("liverpool's" not (new south wales\* or nsw)) or ((london not (ontario\* or ont or toronto\*)) or ("london's" not (ontario\* or ont or toronto\*)) or manchester or "manchester's" or (newcastle not (new south wales\* or nsw)) or ("newcastle's" not (new south wales\* or nsw)) or norwich or "norwich's" or nottingham or "nottingham's" or oxford or "oxford's" or peterborough or "peterborough's" or plymouth or "plymouth's" or portsmouth or "portsmouth's" or preston or "preston's" or ripon or "ripon's" or salford or "salford's" or salisbury or "salisbury's" or sheffield or "sheffield's" or southampton or "southampton's" or st albans or stoke or "stoke's" or sunderland or "sunderland's" or truro or "truro's" or wakefield or "wakefield's"

or wells or westminster or "westminster's" or winchester or "winchester's" or wolverhampton or "wolverhampton's" or (worcester not (massachusetts\* or boston\* or harvard\*)) or ("worcester's" not (massachusetts\* or boston\* or harvard\*)) or (york not ("new york\*" or ny or ontario\* or ont or toronto\*)) or ("york's" not ("new york\*" or ny or ontario\* or ont or toronto\*))))):ti,ab,kw

#60 ((bangor or "bangor's" or cardiff or "cardiff's" or newport or "newport's" or st asaph or "st asaph's" or st davids or swansea or "swansea's")):ti,ab,kw

#61 ((aberdeen or "aberdeen's" or dundee or "dundee's" or edinburgh or "edinburgh's" or glasgow or "glasgow's" or inverness or (perth not australia\*) or ("perth's" not australia\*) or stirling or "stirling's")):ti,ab,kw

#62 ((armagh or "armagh's" or belfast or "belfast's" or lisburn or "lisburn's" or londonderry or "londonderry's" or derry or "derry's" or newry or "newry's")):ti,ab,kw

#63 #55 or #56 or #57 or #58 or #59 or #60 or #61 or #62

#64 MeSH descriptor: [Africa] explode all trees

#65 MeSH descriptor: [Americas] explode all trees

#66 MeSH descriptor: [Antarctic Regions] explode all trees

#67 MeSH descriptor: [Arctic Regions] explode all trees

#68 MeSH descriptor: [Asia] explode all trees

#69 MeSH descriptor: [Oceania] explode all trees

#70 MeSH descriptor: [United Kingdom] explode all trees

#71 MeSH descriptor: [Europe] explode all trees

#72 #64 or #65 or #66 or #67 or #68 or #69

#73 #70 or #71

#74 #72 NOT #73

#75 #63 NOT #74

#76 #3 and #24 and #49

#77 #3 and #24 and #54

#78 #76 or #77

#79 #78 and #75

### Appendix S3.7: Search Strategies – Science Citation Index Expanded

#### Science Citation Index Expanded via Web Of Science Core Collection 01/9/21.

18

#9 AND #17

17

#10 OR #11 OR #12 OR #13 OR #14 OR #15 OR #16

16

(TI=(armagh or "armagh's" or belfast or "belfast's" or lisburn or "lisburn's" or londonderry or "londonderry's" or derry or "derry's" or newry or "newry's")) OR (AB=(armagh or "armagh's" or belfast or "belfast's" or lisburn or "lisburn's" or londonderry or "londonderry's" or derry or "derry's" or newry or "newry's")) OR (AD=(armagh or "armagh's" or belfast or "belfast's" or lisburn or "lisburn's" or londonderry or "londonderry's" or derry or "derry's" or newry or "newry's"))

15

(TI=(aberdeen or "aberdeen's" or dundee or "dundee's" or edinburgh or "edinburgh's" or glasgow or "glasgow's" or inverness or (perth not australia\*) or ("perth's" not australia\*) or stirling or "stirling's")) OR (AB=(aberdeen or "aberdeen's" or dundee or "dundee's" or edinburgh or "edinburgh's" or glasgow or "glasgow's" or inverness or (perth not australia\*) or ("perth's" not australia\*) or stirling or "stirling's")) OR (AD=(aberdeen or "aberdeen's" or dundee or "dundee's" or edinburgh or "edinburgh's" or glasgow or "glasgow's" or inverness or (perth not australia\*) or ("perth's" not australia\*) or stirling or "stirling's"))

14

(TI=(bangor or "bangor's" or cardiff or "cardiff's" or newport or "newport's" or st asaph or "st asaph's" or st davids or swansea or "swansea's")) OR (AB=(bangor or "bangor's" or cardiff or "cardiff's" or newport or "newport's" or st asaph or "st asaph's" or st davids or swansea or "swansea's")) OR (AD=(bangor or "bangor's" or cardiff or "cardiff's" or newport or "newport's" or st asaph or "st asaph's" or st davids or swansea or "swansea's"))

13

(TI=(bath or "bath's" or ((birmingham not alabama\*) or ("birmingham's" not alabama\*) or bradford or "bradford's" or brighton or "brighton's" or bristol or "bristol's" or carlisle\* or "carlisle's" or (cambridge not (massachusetts\* or boston\* or harvard\*)) or ("cambridge's" not (massachusetts\* or boston\* or harvard\*)) or (canterbury not zealand\*) or ("canterbury's" not zealand\*) or chelmsford or "chelmsford's" or chester or "chester's" or chichester or "chichester's" or coventry or "coventry's" or derby or "derby's" or (durham not (carolina\* or nc)) or ("durham's" not (carolina\* or nc)) or ely or "ely's" or exeter or "exeter's" or gloucester or "gloucester's" or hereford or "hereford's" or hull or "hull's" or lancaster or "lancaster's" or leeds\* or leicester or "leicester's" or (lincoln not nebraska\*) or ("lincoln's" not nebraska\*) or (liverpool not (new south wales\* or nsw)) or ("liverpool's" not (new south wales\* or nsw)) or ((london not (ontario\* or ont or toronto\*)) or ("london's" not (ontario\* or ont or toronto\*)) or manchester or "manchester's" or (newcastle not (new south wales\* or nsw)) or ("newcastle's" not (new south wales\* or nsw)) or norwich or "norwich's" or nottingham or "nottingham's" or oxford or "oxford's" or peterborough or "peterborough's" or plymouth or "plymouth's" or portsmouth or "portsmouth's" or preston or "preston's" or ripon or "ripon's" or salford or "salford's" or salisbury or

"salisbury's" or sheffield or "sheffield's" or southampton or "southampton's" or st albans or stoke or "stoke's" or sunderland or "sunderland's" or truro or "truro's" or wakefield or "wakefield's" or wells or westminster or "westminster's" or winchester or "winchester's" or wolverhampton or "wolverhampton's" or (worchester not (massachusetts\* or boston\* or harvard\*)) or ("worchester's" not (massachusetts\* or boston\* or harvard\*)) or (york not ("new york\*" or ny or ontario\* or ont or toronto\*)) or ("york's" not ("new york\*" or ny or ontario\* or ont or toronto\*)))) OR (AB=(bath or "bath's" or ((birmingham not alabama\*) or ("birmingham's" not alabama\*) or bradford or "bradford's" or brighton or "brighton's" or bristol or "bristol's" or carlisle\* or "carlisle's" or (cambridge not (massachusetts\* or boston\* or harvard\*)) or ("cambridge's" not (massachusetts\* or boston\* or harvard\*)) or (canterbury not zealand\*) or ("canterbury's" not zealand\*) or chelmsford or "chelmsford's" or chester or "chester's" or chichester or "chichester's" or coventry or "coventry's" or derby or "derby's" or (durham not (carolina\* or nc)) or ("durham's" not (carolina\* or nc)) or ely or "ely's" or exeter or "exeter's" or gloucester or "gloucester's" or hereford or "hereford's" or hull or "hull's" or lancaster or "lancaster's" or leeds\* or leicester or "leicester's" or (lincoln not nebraska\*) or ("lincoln's" not nebraska\*) or (liverpool not (new south wales\* or nsw)) or ("liverpool's" not (new south wales\* or nsw)) or ((london not (ontario\* or ont or toronto\*)) or ("london's" not (ontario\* or ont or toronto\*)) or manchester or "manchester's" or (newcastle not (new south wales\* or nsw)) or ("newcastle's" not (new south wales\* or nsw)) or norwich or "norwich's" or nottingham or "nottingham's" or oxford or "oxford's" or peterborough or "peterborough's" or plymouth or "plymouth's" or portsmouth or "portsmouth's" or preston or "preston's" or ripon or "ripon's" or salford or "salford's" or salisbury or "salisbury's" or sheffield or "sheffield's" or southampton or "southampton's" or st albans or stoke or "stoke's" or sunderland or "sunderland's" or truro or "truro's" or wakefield or "wakefield's" or wells or westminster or "westminster's" or winchester or "winchester's" or wolverhampton or "wolverhampton's" or (worchester not (massachusetts\* or boston\* or harvard\*)) or ("worchester's" not (massachusetts\* or boston\* or harvard\*)) or (york not ("new york\*" or ny or ontario\* or ont or toronto\*)) or ("york's" not ("new york\*" or ny or ontario\* or ont or toronto\*)))) OR (AD=(bath or "bath's" or ((birmingham not alabama\*) or ("birmingham's" not alabama\*) or bradford or "bradford's" or brighton or "brighton's" or bristol or "bristol's" or carlisle\* or "carlisle's" or (cambridge not (massachusetts\* or boston\* or harvard\*)) or ("cambridge's" not (massachusetts\* or boston\* or harvard\*)) or (canterbury not zealand\*) or ("canterbury's" not zealand\*) or chelmsford or "chelmsford's" or chester or "chester's" or chichester or "chichester's" or coventry or "coventry's" or derby or "derby's" or (durham not (carolina\* or nc)) or ("durham's" not (carolina\* or nc)) or ely or "ely's" or exeter or "exeter's" or gloucester or "gloucester's" or hereford or "hereford's" or hull or "hull's" or lancaster or "lancaster's" or leeds\* or leicester or "leicester's" or (lincoln not nebraska\*) or ("lincoln's" not nebraska\*) or (liverpool not (new south wales\* or nsw)) or ("liverpool's" not (new south wales\* or nsw)) or ((london not (ontario\* or ont or toronto\*)) or ("london's" not (ontario\* or ont or toronto\*)) or manchester or "manchester's" or (newcastle not (new south wales\* or nsw)) or ("newcastle's" not (new south wales\* or nsw)) or norwich or "norwich's" or nottingham or "nottingham's" or oxford or "oxford's" or peterborough or "peterborough's" or plymouth or "plymouth's" or portsmouth or "portsmouth's" or preston or "preston's" or ripon or "ripon's" or salford or "salford's" or salisbury or "salisbury's" or sheffield or "sheffield's" or southampton or "southampton's" or st

albans or stoke or "stoke's" or sunderland or "sunderland's" or truro or "truro's" or wakefield or "wakefield's" or wells or westminster or "westminster's" or winchester or "winchester's" or wolverhampton or "wolverhampton's" or (worchester not (massachusetts\* or boston\* or harvard\*)) or ("worchester's" not (massachusetts\* or boston\* or harvard\*)) or (york not ("new york\*" or ny or ontario\* or ont or toronto\*)) or ("york's" not ("new york\*" or ny or ontario\* or ont or toronto\*))))))

12

(TI=(gb or "g.b." or britain\* or (british\* not "british columbia") or uk or "u.k." or united kingdom\* or (england\* not "new england") or northern ireland\* or northern irish\* or scotland\* or scottish\* or ((wales or "south wales") not "new south wales") or welsh\*)) OR (AB=(gb or "g.b." or britain\* or (british\* not "british columbia") or uk or "u.k." or united kingdom\* or (england\* not "new england") or northern ireland\* or northern irish\* or scotland\* or scottish\* or ((wales or "south wales") not "new south wales") or welsh\*)) OR (AD=(gb or "g.b." or britain\* or (british\* not "british columbia") or uk or "u.k." or united kingdom\* or (england\* not "new england") or northern ireland\* or northern irish\* or scotland\* or scottish\* or ((wales or "south wales") not "new south wales") or welsh\*))

11

(TI=(english not ((published or publication\* or translat\* or written or language\* or speak\* or literature or citation\*) near/5 english))) OR (AB=(english not ((published or publication\* or translat\* or written or language\* or speak\* or literature or citation\*) near/5 english)))

10

((TI=((national health service\* or NHS\*))) OR AB=((national health service\* or NHS\*))) OR AD=((national health service\* or NHS\*))

9

#7 OR #8

8

#1 AND #2 AND #6

7

#1 AND #2 AND #3

6

#4 or #5

5

TS=(stage\* near/5 (diagnosis or diagnostic))

4

TS=((patient\* or present\* or doctor\* or physician\* or practitioner\* or hospital\* or system\* or (primary near/1 care) or (secondary near/1 care) or total or (help near/3 seek) or pre-treatment\* or referr\* or specialist\* or consultant\* or surg\* or chemothera\* or radiothera\* or treatment\* or diagnos\*) near/5 (delay\* or interval\* or time\* or pathway\* or route\*))

3

TS=(surgery or treatment or "treatment disparities" or chemotherapy or radiotherapy or accessibility or access or pattern\* or care or investigation or receipt or provision or attendance)

2

TS=(socio-economic or socioeconomic or socio-demographic or sociodemographic or "socio-economic position" or "socioeconomic position" or inequalities or "social factors"



or income or "social class" or education or depriv\* or equity or equitable or inequity or inequitable or inequities or disparit\*)

1

(TS=(((colon\* or colorectal or rectal) near/3 (cancer\* or neoplas\* or tumor\* or tumour\* or malignan\* or carcinoma\* or metasta\* or oncolog\*))))

## Appendix S3.8: Search Strategies – CINAHL

### CINAHL Searched via EBSCO 31/8/21

| #   | Query                                                                                                                                                                                                                                                                                                                |
|-----|----------------------------------------------------------------------------------------------------------------------------------------------------------------------------------------------------------------------------------------------------------------------------------------------------------------------|
| S1  | (MH "Colorectal Neoplasms+")<br><br>TI ((colon* or colorectal or rectal) n3 (cancer* or neoplas* or tumor* or tumour* or malignan* or carcinoma* or metasta* or oncolog*)) or AB ((colon* or colorectal or rectal) n3 (cancer* or neoplas* or tumor* or tumour* or malignan* or carcinoma* or metasta* or oncolog*)) |
| S2  |                                                                                                                                                                                                                                                                                                                      |
| S3  | S1 OR S2                                                                                                                                                                                                                                                                                                             |
| S4  | (MH "Socioeconomic Factors+")<br><br>TI (socio-economic or socioeconomic or socio-demographic or sociodemographic) or AB (socio-economic or socioeconomic or socio-demographic or sociodemographic)                                                                                                                  |
| S5  |                                                                                                                                                                                                                                                                                                                      |
| S6  | (MH "Education+")                                                                                                                                                                                                                                                                                                    |
| S7  | (MH "Income+")                                                                                                                                                                                                                                                                                                       |
| S8  | (MH "Health Status+")                                                                                                                                                                                                                                                                                                |
| S9  | (MH "Poverty+")<br><br>TI (socio-economic position or socioeconomic position) or AB (socio-economic position or socioeconomic position)                                                                                                                                                                              |
| S10 |                                                                                                                                                                                                                                                                                                                      |
| S11 | TI inequalities or AB inequalities                                                                                                                                                                                                                                                                                   |
| S12 | (MH "Social Environment+")                                                                                                                                                                                                                                                                                           |
| S13 | TI (social factors) or AB (social factors)                                                                                                                                                                                                                                                                           |
| S14 | TI income or AB income                                                                                                                                                                                                                                                                                               |
| S15 | (MH "Residence Characteristics+")                                                                                                                                                                                                                                                                                    |
| S16 | TI (social class) or AB (social class)                                                                                                                                                                                                                                                                               |
| S17 | TI education or AB education                                                                                                                                                                                                                                                                                         |
| S18 | (MH "Health Status Disparities")                                                                                                                                                                                                                                                                                     |
| S19 | TI (depriv*) or AB (depriv*)                                                                                                                                                                                                                                                                                         |
| S20 | TI (equity or equitable) or AB (equity or equitable)                                                                                                                                                                                                                                                                 |
| S21 | TI (inequity or inequitable) or AB (inequity or inequitable)                                                                                                                                                                                                                                                         |
| S22 | TI inequities or AB inequities                                                                                                                                                                                                                                                                                       |
| S23 | TI disparit* or AB disparit*<br><br>(S4 OR S5 OR S6 OR S7 OR S8 OR S9 OR S10 OR S11 OR S12 OR S13 OR S14 OR S15 OR S16 OR S17 OR S18 OR S19 OR S20 OR S21 OR S22 OR S23)                                                                                                                                             |
| S24 |                                                                                                                                                                                                                                                                                                                      |
| S25 | TI (surgery) or AB (surgery)                                                                                                                                                                                                                                                                                         |
| S26 | TI (treatment) or AB (treatment)                                                                                                                                                                                                                                                                                     |

- S27 (MH "Health Services Accessibility+")
- S28 (MH "Healthcare Disparities")
- S29 TI (treatment disparities) or AB (treatment disparities)
- S30 (MH "Health Care Delivery+")
- S31 (MH "Primary Health Care")
- S32 (MH "Drug Therapy+")
- S33 TI (chemotherapy) or AB (chemotherapy)
- S34 (MH "Radiotherapy, Adjuvant+") OR (MH "Radiotherapy+")
- S35 TI (radiotherapy) or AB (radiotherapy)
- S36 TI (accessibility) or AB (accessibility)
- S37 TI (access) AB (access)
- S38 TI (pattern\*) or AB (pattern\*)
- S39 (MH "Patient Care+") or (MH "Palliative Care")
- S40 TI (care) or AB (care)
- S41 TI (investigation) or AB (investigation)
- S42 (MH "Quality of Health Care+")
- S43 (MH "Eligibility Determination") or (MH "Patient Selection")
- S44 (MH "Referral and Consultation+")
- S45 TI (("receipt") or ("patient acceptance of health care")) or AB (("receipt") or ("patient acceptance of health care"))
- S46 TI (provision) or AB (provision)
- S47 TI (attendance) or AB (attendance)
- S48 S25 OR S26 OR S27 OR S28 OR S29 OR S30 OR S31 OR S32 OR S33 OR S34 OR S35 OR S36 OR S37 OR S38 OR S39 OR S40 OR S41 OR S42 OR S43 OR S44 OR S45 OR S46 OR S47
- S49 (MH "Early Detection of Cancer")
- S50 (MH "Early Diagnosis+")
- S51 TI ( ((patient\* or present\* or doctor\* or physician\* or practitioner\* or hospital\* or system\* or (primary n1 care) or (secondary n1 care) or total or (help n1 seek) or pre-treatment\* or refer\* or specialist\* or consultant\* or surg\* or chemothera\* or radiothera\* or treatment\* or diagnos\*) n5 (delay\* or interval\* or time\* or pathway\* or route\*)) ) OR AB ( ((patient\* or present\* or doctor\* or physician\* or practitioner\* or hospital\* or system\* or (primary n1 care) or (secondary n1 care) or total or (help n1 seek) or pre-treatment\* or refer\* or specialist\* or consultant\* or surg\* or chemothera\* or radiothera\* or treatment\* or diagnos\*) n5 (delay\* or interval\* or time\* or pathway\* or route\*)) )
- S52 TI ( (stage\* n5 (diagnosis or diagnostic)) ) OR AB ( (stage\* n5 (diagnosis or diagnostic)) )
- S53 S49 OR S50 OR S51 OR S52

- S54 (MH "Great Britain") OR (MH "United Kingdom+")
- S55 TI ( (national health service\* or NHS\*) ) OR AB ( (national health service\* or NHS\*) )  
OR AF ( (national health service\* or NHS\*) )
- S56 TI ( (english not ((published or publication\* or translat\* or written or language\* or speak\* or literature or citation\*) n5 english)) ) OR AB ( (english not ((published or publication\* or translat\* or written or language\* or speak\* or literature or citation\*) n5 english)) )
- S57 TI ( (gb or "g.b." or britain\* or (british\* not "british columbia") or uk or "u.k." or united kingdom\* or (england\* not "new england") or northern ireland\* or northern irish\* or scotland\* or scottish\* or ((wales or "south wales") not "new south wales") or welsh\* ) OR AB ( (gb or "g.b." or britain\* or (british\* not "british columbia") or uk or "u.k." or united kingdom\* or (england\* not "new england") or northern ireland\* or northern irish\* or scotland\* or scottish\* or ((wales or "south wales") not "new south wales") or welsh\* ) OR AF ( (gb or "g.b." or britain\* or (british\* not "british columbia") or uk or "u.k." or united kingdom\* or (england\* not "new england") or northern ireland\* or northern irish\* or scotland\* or scottish\* or ((wales or "south wales") not "new south wales") or welsh\* )
- S58 TI ( (bath or "bath's" or ((birmingham not alabama\*) or ("birmingham's" not alabama\*) or bradford or "bradford's" or brighton or "brighton's" or bristol or "bristol's" or carlisle\* or "carlisle's" or (cambridge not (massachusetts\* or boston\* or harvard\*)) or ("cambridge's" not (massachusetts\* or boston\* or harvard\*)) or (canterbury not zealand\*) or ("canterbury's" not zealand\*) or chelmsford or "chelmsford's" or chester or "chester's" or chichester or "chichester's" or coventry or "coventry's" or derby or "derby's" or "derby's" or (durham not (carolina\* or nc)) or ("durham's" not (carolina\* or nc)) or ely or "ely's" or exeter or "exeter's" or gloucester or "gloucester's" or hereford or "hereford's" or hull or "hull's" or lancaster or "lancaster's" or leeds\* or leicester or "leicester's" or (lincoln not nebraska\*) or ("lincoln's" not nebraska\*) or (liverpool not (new south wales\* or nsw)) or ("liverpool's" not (new south wales\* or nsw)) or ((london not (ontario\* or ont or toronto\*)) or ("london's" not (ontario\* or ont or toronto\*)) or manchester or "manchester's" or (newcastle not (new south wales\* or nsw)) or ("newcastle's" not (new south wales\* or nsw)) or norwich or "norwich's" or nottingham or "nottingham's" or oxford or "oxford's" or peterborough or "peterborough's" or plymouth or "plymouth's" or portsmouth or "portsmouth's" or preston or "preston's" or ripon or "ripon's" or salford or "salford's" or salisbury or "salisbury's" or sheffield or "sheffield's" or southampton or "southampton's" or st albans or stoke or "stoke's" or sunderland or "sunderland's" or truro or "truro's" or wakefield or "wakefield's" or wells or westminster or "westminster's" or winchester or "winchester's" or wolverhampton or "wolverhampton's" or (worchester not (massachusetts\* or boston\* or harvard\*)) or ("worchester's" not (massachusetts\* or boston\* or harvard\*)) or (york not ("new york\*" or ny or ontario\* or ont or toronto\*)) or ("york's" not ("new york\*" or ny or ontario\* or ont or toronto\*)))) ) OR AB ( (bath or "bath's" or ((birmingham not alabama\*) or ("birmingham's" not alabama\*) or bradford or "bradford's" or brighton or "brighton's" or bristol or "bristol's" or carlisle\* or "carlisle's" or (cambridge not (massachusetts\* or boston\* or harvard\*)) or ("cambridge's" not (massachusetts\* or boston\* or harvard\*)) or (canterbury not zealand\*) or ("canterbury's" not zealand\*) or chelmsford or "chelmsford's" or chester or "chester's" or chichester or "chichester's" or coventry or "coventry's" or derby or "derby's" or (durham not (carolina\* or nc)) or ("durham's" not (carolina\* or nc)) or ely or "ely's" or exeter or "exeter's" or gloucester or "gloucester's" or hereford or "hereford's" or hull or "hull's" or lancaster or "lancaster's" or leeds\* or leicester or "leicester's" or (lincoln not nebraska\*) or ("lincoln's" not nebraska\*) or (liverpool not (new south wales\* or nsw)) or ("liverpool's" not (new south wales\* or nsw)) or ((london not (ontario\* or ont or toronto\*)) or ("london's" not (ontario\* or ont or toronto\*)) or manchester or "manchester's" or (newcastle not (new south wales\* or nsw)) or ("newcastle's" not (new south wales\* or nsw)) or norwich or "norwich's" or nottingham or "nottingham's" or oxford or "oxford's" or peterborough or "peterborough's" or plymouth or "plymouth's" or portsmouth or "portsmouth's" or preston or "preston's" or ripon or "ripon's" or salford or "salford's" or salisbury or "salisbury's" or sheffield or "sheffield's" or southampton or

- "southampton's" or st albans or stoke or "stoke's" or sunderland or "sunderland's" or truro or "truro's" or wakefield or "wakefield's" or wells or westminster or "westminster's" or winchester or "winchester's" or wolverhampton or "wolverhampton's" or (worchester not (massachusetts\* or boston\* or harvard\*)) or ("worchester's" not (massachusetts\* or boston\* or harvard\*)) or (york not ("new york\*" or ny or ontario\* or ont or toronto\*)) or ("york's" not ("new york\*" or ny or ontario\* or ont or toronto\*)))) ) OR AF ( (bath or "bath's" or ((birmingham not alabama\*) or ("birmingham's" not alabama\*)) or bradford or "bradford's" or brighton or "brighton's" or bristol or "bristol's" or carlisle\* or "carlisle's" or (cambridge not (massachusetts\* or boston\* or harvard\*)) or ("cambridge's" not (massachusetts\* or boston\* or harvard\*)) or (canterbury not zealand\*) or ("canterbury's" not zealand\*) or chelmsford or "chelmsford's" or chester or "chester's" or chichester or "chichester's" or coventry or "coventry's" or derby or "derby's" or (durham not (carolina\* or nc)) or ("durham's" not (carolina\* or nc)) or ely or "ely's" or exeter or "exeter's" or gloucester or "gloucester's" or hereford or "hereford's" or hull or "hull's" or lancaster or "lancaster's" or leeds\* or leicester or "leicester's" or (lincoln not nebraska\*) or ("lincoln's" not nebraska\*) or (liverpool not (new south wales\* or nsw)) or ("liverpool's" not (new south wales\* or nsw)) or ((london not (ontario\* or ont or toronto\*)) or ("london's" not (ontario\* or ont or toronto\*)) or manchester or "manchester's" or (newcastle not (new south wales\* or nsw)) or ("newcastle's" not (new south wales\* or nsw)) or norwich or "norwich's" or nottingham or "nottingham's" or oxford or "oxford's" or peterborough or "peterborough's" or plymouth or "plymouth's" or portsmouth or "portsmouth's" or preston or "preston's" or ripon or "ripon's" or salford or "salford's" or salisbury or "salisbury's" or sheffield or "sheffield's" or southampton or "southampton's" or st albans or stoke or "stoke's" or sunderland or "sunderland's" or truro or "truro's" or wakefield or "wakefield's" or wells or westminster or "westminster's" or winchester or "winchester's" or wolverhampton or "wolverhampton's" or (worchester not (massachusetts\* or boston\* or harvard\*)) or ("worchester's" not (massachusetts\* or boston\* or harvard\*)) or (york not ("new york\*" or ny or ontario\* or ont or toronto\*)) or ("york's" not ("new york\*" or ny or ontario\* or ont or toronto\*)))) )
- Tl ( (bangor or "bangor's" or cardiff or "cardiff's" or newport or "newport's" or st asaph or "st asaph's" or st davids or swansea or "swansea's") ) OR AB ( (bangor or "bangor's" or cardiff or "cardiff's" or newport or "newport's" or st asaph or "st asaph's" or st davids or swansea or "swansea's") ) OR AF ( (bangor or "bangor's" or cardiff or "cardiff's" or newport or "newport's" or st asaph or "st asaph's" or st davids or swansea or "swansea's") )
- S59
- Tl ( (aberdeen or "aberdeen's" or dundee or "dundee's" or edinburgh or "edinburgh's" or glasgow or "glasgow's" or inverness or (perth not australia\*)) or ("perth's" not australia\*)) or stirling or "stirling's") ) OR AB ( (aberdeen or "aberdeen's" or dundee or "dundee's" or edinburgh or "edinburgh's" or glasgow or "glasgow's" or inverness or (perth not australia\*)) or ("perth's" not australia\*)) or stirling or "stirling's") ) OR AF ( (aberdeen or "aberdeen's" or dundee or "dundee's" or edinburgh or "edinburgh's" or glasgow or "glasgow's" or inverness or (perth not australia\*)) or ("perth's" not australia\*)) or stirling or "stirling's") )
- S60
- Tl ( (armagh or "armagh's" or belfast or "belfast's" or lisburn or "lisburn's" or londonderry or "londonderry's" or derry or "derry's" or newry or "newry's") ) OR AB ( (armagh or "armagh's" or belfast or "belfast's" or lisburn or "lisburn's" or londonderry or "londonderry's" or derry or "derry's" or newry or "newry's") ) OR AF ( (armagh or "armagh's" or belfast or "belfast's" or lisburn or "lisburn's" or londonderry or "londonderry's" or derry or "derry's" or newry or "newry's") )
- S61
- S62 S54 OR S55 OR S56 OR S57 OR S58 OR S59 OR S60 OR S61
- ((MH "Africa+") OR (MH "America+") OR (MH "North America+") OR (MH "Latin America") OR (MH "Central America+") OR (MH "Antarctic Regions") OR (MH "Arctic Regions") OR (MH "Asia+") OR (MH "Asia, Western+") OR (MH "Asia, Central+") OR (MH "Australia+") OR (MH "New Zealand")) NOT ((MH "Europe+") OR (MH "Great Britain") OR (MH "United Kingdom+"))
- S63

S64 S62 NOT S63

S65 PT case report or case study

S66 PT letter

S67 (((MH "Animals+") OR (MH "Animal Studies") OR (TI "animal model\*")) NOT (MH "human"))

S68 S65 OR S66 OR S67

S69 S3 AND S24 AND S48

S70 S3 AND S24 AND S53

S71 S69 OR S70

S72 S64 AND S71

S73 S72 NOT S68

### Appendix S3.9: Search Strategies – Others

#### NICE Evidence Search (<https://www.evidence.nhs.uk>) –

Colorectal cancer and inequal\*

Colorectal cancer and depriv\*

NB. The repeat searches did not utilise NICE Evidence Search due to the website's closure.

#### Base search (<https://www.base-search.net>)

Limits placed - Content providers as United Kingdom and Document Type set to: Text (all) and Dataset and Unknown. This meant excluding: Musical Notation, Map, Audio, Software and Image/Video.

Colorectal cancer and inequal\*

Colorectal cancer and depriv\*

#### Google Advanced Search ([https://www.google.com/advanced\\_search](https://www.google.com/advanced_search))

Colorectal cancer and inequal\*

Colorectal cancer and depriv\*

Limited to the first 5 pages of results unless the search still appeared relevant, in which case the search would have continued.

## **Appendix S4: Development and Validation of the Search Strategy and Record Management**

The search was developed in MEDLINE using free-text words and subject indexing terms and subsequently adapted for the other databases. Briefly, the search strategies combined different concepts:

- Colorectal cancer *and* socioeconomic inequalities *and* system interval *and* the UK
- Or, colorectal cancer *and* socioeconomic inequalities *and* treatment *and* the UK

Search filters were used to focus on UK-based studies and exclude non-human studies to improve specificity.<sup>45,46</sup> The search strategy was reviewed by SG using the Peer Review of Electronic Search Strategies for systematic reviews guideline.<sup>47</sup>

Two systematic reviews provided the initial search strategy for the treatment, interval and socioeconomic inequality concepts.<sup>48,49</sup> Further search terms were identified from search filters.<sup>50-52</sup> Thirty-five potentially relevant studies were subsequently used to identify further search terms using MeSH Analyzer, a word frequency analysis tool.<sup>53</sup>

The search strategy was tested against a set of the 35 known, potentially relevant records. The results of the draft MEDLINE search strategy found 31 of 35 potentially relevant articles. The search was subsequently refined and was able to capture one further article. However, no other changes to the strategy were possible due to a lack of possible candidate search terms in the title/abstract or subject indexing terms of the remaining three uncaptured articles.

The authors of the current systematic review also conducted an almost identical systematic review about ovarian cancer. For this reason, some of the studies used in the development process were about ovarian cancer. However, this development process enhanced the search strategy for both systematic reviews. The potentially relevant studies are referenced here. Not all were necessarily deemed eligible for inclusion in either of the final two systematic reviews. <sup>4,6-10,12-15,17-20,23-26,28,29,34-39,54-62</sup>

Search results were imported into EndNote X9,<sup>42</sup> and duplicates were removed using adapted EndNote de-duplication methods published by Bramer et al., 2016.<sup>63</sup> The remaining search results were transferred to Covidence systematic review software.<sup>64</sup>



## Appendix S5: Data items and effect measures

The following data were extracted: first author, year of publication, data source, region/country, years of diagnosis, site (colon vs rectal), stage, size of the analytical cohort, measure of socioeconomic status, and the number of socioeconomic groups. Assumptions about missing or unclear information were clearly stated.

For all included studies, data for the following outcomes were extracted:

- Measures of the system interval length, including precise definitions of the time intervals.
  - Effects of socioeconomic factors on the system interval were assessed using coefficients from regression analyses.
  - Or else rates of patients meeting targets were extracted. The odds of meeting targets amongst patients from the most deprived group compared to the least deprived group were calculated. 95% confidence intervals were calculated using RevMan 5.4.<sup>65</sup>
- Cancer-directed therapy received, including the timescale and definitions of treatment. The extracted effect measures were:
  - Adjusted estimates for the likelihood of a particular treatment for the most deprived socioeconomic groups, with 95% confidence intervals. Details of confounding variables were also extracted.
  - If unavailable, unadjusted rates were extracted. The odds of treatment amongst patients from the most deprived group compared to the least deprived group were calculated. 95% confidence intervals were calculated using RevMan 5.4.<sup>65</sup> Statistical tests of association were reported when available.

### Appendix S6: Study Risk of Bias Assessment

|                               | Selection bias     |                    |                                               |                                               | Prognostic factor measurement                                                      | Outcome measurement                          | Study confounding                                                   | Statistical reporting                          | Strength of Evidence |
|-------------------------------|--------------------|--------------------|-----------------------------------------------|-----------------------------------------------|------------------------------------------------------------------------------------|----------------------------------------------|---------------------------------------------------------------------|------------------------------------------------|----------------------|
| First author (Date published) | Inclusion criteria | Exclusion criteria | Baseline characteristics adequately described | Source and time period adequate and described | Clear and valid definition of socioeconomic status, measurement and categorisation | Clear definition and methods for the outcome | Important potential confounding factors appropriately accounted for | Appropriate analysis and all outcomes reported |                      |
| Bailey (2002)                 | High               | High               | Moderate                                      | High                                          | High                                                                               | High                                         | High                                                                | High                                           | Weak                 |
| Bharathan (2011)              | Moderate           | Moderate           | Low                                           | Moderate                                      | Moderate                                                                           | High                                         | High                                                                | High                                           | Weak                 |
| Benitez Majano (2022) [1]     | Low                | Low                | Low                                           | Moderate                                      | Low                                                                                | Low                                          | Low                                                                 | Low                                            | Strong               |
| Benitez Majano (2022) [2]     | Low                | Low                | Low                                           | Moderate                                      | Low                                                                                | Low                                          | Low                                                                 | Low                                            | Strong               |
| Boyle (2020)                  | Low                | Low                | Low                                           | Low                                           | Low                                                                                | Low                                          | Low                                                                 | Low                                            | Strong               |
| Campbell (2002)               | High               | High               | Low                                           | High                                          | Low                                                                                | Moderate                                     | Moderate                                                            | High                                           | Weak                 |
| Crawford (2012)               | Moderate           | Moderate           | High                                          | Moderate                                      | Moderate                                                                           | High                                         | Moderate                                                            | High                                           | Weak                 |
| Di Girolamo (2018)            | Low                | Low                | Low                                           | Low                                           | Low                                                                                | Low                                          | Moderate                                                            | Low                                            | Strong               |
| Fenton (2019)                 | Low                | Low                | Low                                           | Low                                           | Low                                                                                | Low                                          | Low                                                                 | Low                                            | Strong               |
| Fenton (2020)                 | Low                | Low                | Low                                           | Low                                           | Low                                                                                | Low                                          | Low                                                                 | Low                                            | Strong               |
| Harris (2009)                 | Moderate           | High               | Low                                           | High                                          | Low                                                                                | High                                         | High                                                                | High                                           | Weak                 |
| Hassan (2023)                 | Low                | Low                | Low                                           | Low                                           | Low                                                                                | Low                                          | Moderate                                                            | Low                                            | Strong               |
| Hayes (2019)                  | Low                | Moderate           | Low                                           | Moderate                                      | Low                                                                                | Moderate                                     | Low                                                                 | Low                                            | Strong               |
| Hayes (2021)                  | Low                | Low                | Low                                           | Moderate                                      | Low                                                                                | Moderate                                     | Low                                                                 | Low                                            | Strong               |
| Hole (2002)                   | Moderate           | High               | Low                                           | Moderate                                      | Moderate                                                                           | High                                         | High                                                                | High                                           | Weak                 |
| Jones (2008)                  | Moderate           | Moderate           | High                                          | Moderate                                      | Moderate                                                                           | High                                         | Moderate                                                            | Moderate                                       | Weak                 |

**Appendix S6: Study Risk of Bias Assessment - CONTINUED**

|                                             | Selection bias     |                    |                                               |                                               | Prognostic factor measurement                                                      | Outcome measurement                          | Study confounding                                                   | Statistical reporting                          | Strength of Evidence |
|---------------------------------------------|--------------------|--------------------|-----------------------------------------------|-----------------------------------------------|------------------------------------------------------------------------------------|----------------------------------------------|---------------------------------------------------------------------|------------------------------------------------|----------------------|
| First author (Date published)               | Inclusion criteria | Exclusion criteria | Baseline characteristics adequately described | Source and time period adequate and described | Clear and valid definition of socioeconomic status, measurement and categorisation | Clear definition and methods for the outcome | Important potential confounding factors appropriately accounted for | Appropriate analysis and all outcomes reported |                      |
| Lejeune (2010)                              | Low                | Low                | Low                                           | Low                                           | Low                                                                                | High                                         | Moderate                                                            | Moderate                                       | Moderate             |
| McLeod (1999)                               | Moderate           | Moderate           | High                                          | Moderate                                      | Low                                                                                | Low                                          | High                                                                | High                                           | Weak                 |
| Morris (2008)                               | Low                | Low                | Low                                           | Low                                           | Low                                                                                | Low                                          | Moderate                                                            | Low                                            | Strong               |
| Morris (2010)                               | Low                | Moderate           | Low                                           | Low                                           | Low                                                                                | Low                                          | Low                                                                 | Low                                            | Strong               |
| Morris (2016)                               | Moderate           | High               | Low                                           | Low                                           | Low                                                                                | Low                                          | High                                                                | High                                           | Weak                 |
| National Cancer Intelligence Network (2011) | Low                | Low                | High                                          | Low                                           | High                                                                               | Low                                          | High                                                                | High                                           | Weak                 |
| NCRAS (2018)                                | Low                | Low                | Low                                           | Low                                           | Low                                                                                | Low                                          | High                                                                | Moderate                                       | Moderate             |
| Neal (2005)                                 | High               | High               | High                                          | Moderate                                      | Low                                                                                | High                                         | High                                                                | Moderate                                       | Weak                 |
| Nicholson (2012)                            | Moderate           | Moderate           | Low                                           | High                                          | High                                                                               | Moderate                                     | Moderate                                                            | High                                           | Weak                 |
| Paterson (2014)                             | Moderate           | Moderate           | Low                                           | Moderate                                      | Low                                                                                | High                                         | Moderate                                                            | High                                           | Weak                 |
| Pearson (2019)                              | Low                | Low                | Low                                           | Low                                           | Low                                                                                | Low                                          | Low                                                                 | Low                                            | Strong               |
| Pitchforth (2002)                           | Low                | Low                | Low                                           | Moderate                                      | Moderate                                                                           | Moderate                                     | High                                                                | Moderate                                       | Moderate             |
| Pollock and Vickers (1998)                  | Moderate           | Moderate           | High                                          | High                                          | Low                                                                                | Moderate                                     | High                                                                | High                                           | Weak                 |
| Price (2020)                                | Low                | Low                | Moderate                                      | Low                                           | Low                                                                                | Low                                          | Moderate                                                            | Low                                            | Strong               |

**Appendix S6: Study Risk of Bias Assessment - CONTINUED**

|                               | Selection bias     |                    |                                               |                                               | Prognostic factor measurement                                                      | Outcome measurement                          | Study confounding                                                   | Statistical reporting                          | Strength of Evidence |
|-------------------------------|--------------------|--------------------|-----------------------------------------------|-----------------------------------------------|------------------------------------------------------------------------------------|----------------------------------------------|---------------------------------------------------------------------|------------------------------------------------|----------------------|
| First author (Date published) | Inclusion criteria | Exclusion criteria | Baseline characteristics adequately described | Source and time period adequate and described | Clear and valid definition of socioeconomic status, measurement and categorisation | Clear definition and methods for the outcome | Important potential confounding factors appropriately accounted for | Appropriate analysis and all outcomes reported |                      |
| Radwan (2016)                 | Moderate           | Moderate           | Moderate                                      | Moderate                                      | Moderate                                                                           | High                                         | High                                                                | High                                           | Weak                 |
| Raine (2010)                  | Low                | Low                | Low                                           | Moderate                                      | Low                                                                                | Moderate                                     | High                                                                | High                                           | Weak                 |
| Redanial (2014)               | Low                | Low                | Low                                           | Low                                           | Low                                                                                | Low                                          | Moderate                                                            | Moderate                                       | Strong               |
| Saito (2019) [1]              | Low                | Low                | Low                                           | Low                                           | Low                                                                                | Low                                          | Low                                                                 | Low                                            | Strong               |
| Saito (2021) [2]              | Low                | Low                | Low                                           | Low                                           | Low                                                                                | Low                                          | Low                                                                 | Low                                            | Strong               |
| Shack (2009)                  | Low                | Low                | Low                                           | Moderate                                      | Low                                                                                | Moderate                                     | Low                                                                 | Moderate                                       | Strong               |
| Smith (2006)                  | Moderate           | Moderate           | Low                                           | High                                          | Low                                                                                | High                                         | High                                                                | High                                           | Weak                 |
| Taylor (2021)                 | Low                | Low                | Low                                           | Low                                           | Low                                                                                | Low                                          | Low                                                                 | Low                                            | Strong               |
| Tilney (2008)                 | Moderate           | High               | Low                                           | Moderate                                      | Low                                                                                | Low                                          | High                                                                | Moderate                                       | Weak                 |
| Tilney (2009)                 | Moderate           | Moderate           | Low                                           | High                                          | Low                                                                                | Low                                          | High                                                                | High                                           | Weak                 |
| Vallance (2018)               | Low                | Low                | Low                                           | Low                                           | Low                                                                                | Low                                          | Low                                                                 | Low                                            | Strong               |

### Appendix S7: Characteristics of Included Studies

| First Author (Year)              | Data Source                               | Region/Country           | Site       | Stage      | Years Studied                                | Measure of SES (No. Groups)                | Broad Outcome                                              |
|----------------------------------|-------------------------------------------|--------------------------|------------|------------|----------------------------------------------|--------------------------------------------|------------------------------------------------------------|
| <b>Bailey (2002)</b>             | Patients enrolled from six study centres. | England (Not Specified)  | Colorectal | Dukes' C   | Not recorded                                 | Economic Resources Domain - OARS OMFAQ (2) | Chemotherapy                                               |
| <b>Benitez Majano [1] (2022)</b> | Cancer Registration Data, CPRD, HES.      | England                  | Colon      | All stages | Diagnosed 2011-2015                          | IMD 2015 (5)                               | System Interval                                            |
| <b>Benitez Majano [2] (2022)</b> | Cancer Registration Data, CPRD, HES.      | England                  | Colorectal | All stages | Diagnosed 2011-2015                          | IMD 2015 (5)                               | System Interval                                            |
| <b>Bharathan (2011)</b>          | Colorectal Cancer Audit Group Database.   | Northern England         | Colorectal | All stages | Admitted/Referred to Surgical Unit 1998-2002 | IMD 2004 – without health (5)              | Surgery                                                    |
| <b>Boyle (2020)</b>              | NBOCA, HES, SACT.                         | England                  | Colon      | Stage III  | Diagnosed 2014-2017                          | IMD (5)                                    | Chemotherapy                                               |
| <b>Campbell (2002)</b>           | Case notes. Scottish Cancer Registry.     | North/Northeast Scotland | Colorectal | All stages | Diagnosed 1995-1996                          | Carstairs Index 1991 (5)                   | Chemotherapy<br>Radiotherapy<br>Surgery<br>System Interval |
| <b>Crawford (2012)</b>           | Northern and Yorkshire Cancer Registry.   | Northern England         | Colorectal | All stages | Diagnosed 1994-2002                          | IMD - without access to services (4)       | Any Treatment<br>Chemotherapy                              |
| <b>Di Girolamo (2018)</b>        | Cancer Registration Data, NBOCA, CWT.     | England                  | Colorectal | All stages | Diagnosed 2009-2013                          | IMD Assumed 2007 - Income Domain (5)       | System Interval                                            |
| <b>Fenton (2019)</b>             | CORECT-R, Cancer Registration Data, HES.  | England                  | Colorectal | All stages | Major resection for CRC in 2005-2012         | IMD 2010 – Income Domain (5)               | Liver Resection                                            |

**Appendix S7: Characteristics of Included Studies - CONTINUED**

| <b>First Author<br/>(Year)</b> | <b>Data Source</b>                                             | <b>Region/Country</b> | <b>Site</b> | <b>Stage</b>         | <b>Years Studied</b>                        | <b>Measure of SES<br/>(No. Groups)</b>         | <b>Broad Outcome</b>              |
|--------------------------------|----------------------------------------------------------------|-----------------------|-------------|----------------------|---------------------------------------------|------------------------------------------------|-----------------------------------|
| <b>Fenton (2021)</b>           | CORECT-R, Cancer Registration Data, HES.                       | England               | Colorectal  | All stages           | Major resection for CRC in 2005-2013        | IMD 2010 – Income Domain (5)                   | Pulmonary Resection               |
| <b>Harris (2009)</b>           | Database of patients at an MDT                                 | Birmingham, England   | Rectal      | Assumed all stages   | Diagnosed 2000-2007                         | IMD 2004 - Assumed Income Domain (5)           | Surgery                           |
| <b>Hassan (2023)</b>           | Cancer Registration Data, ONS, SACT.                           | England               | Colon       | Stage III            | Diagnosed 2012-2017                         | IMD 2015 & 2019 (5)                            | Combination Chemotherapy          |
| <b>Hayes (2019)</b>            | Northern and Yorkshire Cancer Registry, HES.                   | Northern England      | Colon       | All stages           | Diagnosed 1999-2010                         | IMD - Income Domain (5)                        | Chemotherapy Surgery              |
| <b>Hayes (2021)</b>            | Northern and Yorkshire Cancer Registry, HES.                   | Northern England      | Colorectal  | All stages           | Diagnosed 2001-2010                         | IMD 2007 & 2010 - Income Domain (5)            | System Interval                   |
| <b>Hole (2002)</b>             | Audit in eight hospitals.                                      | Central Scotland      | Colorectal  | All stages           | Resection in 1991-1994                      | Carstairs Index 1991 (3)                       | Chemotherapy                      |
| <b>Jones (2008)</b>            | Yorkshire Registry and Northern and Yorkshire Cancer Registry. | Northern England      | Colorectal  | All stages           | Diagnosed 1994-2002                         | IMD 2004 – without access domain (scored 0-80) | Chemotherapy Radiotherapy Surgery |
| <b>Lejeune (2010)</b>          | Northern and Yorkshire Cancer Registry, TCR, ECRIC.            | England               | Colorectal  | All stages           | Diagnosed 1997-2000                         | Townsend Index 2001 (5)                        | Any Treatment System Interval     |
| <b>McLeod (1999)</b>           | Hospital Discharge Data (SMR1).                                | Scotland              | Colorectal  | All stages (assumed) | First Inpatient Treatment For CRC 1990-1994 | Carstairs Index 1999 (4)                       | Chemotherapy                      |

**Appendix S7: Characteristics of Included Studies - CONTINUED**

| <b>First Author<br/>(Year)</b> | <b>Data Source</b>                          | <b>Region/Country</b>   | <b>Site</b> | <b>Stage</b>                    | <b>Years Studied</b>                 | <b>Measure of SES<br/>(No. Groups)</b>     | <b>Broad Outcome</b>                                       |
|--------------------------------|---------------------------------------------|-------------------------|-------------|---------------------------------|--------------------------------------|--------------------------------------------|------------------------------------------------------------|
| <b>Morris (2008)</b>           | Cancer Registration Data, HES.              | England                 | Rectal      | All stages who had APER or AR   | Diagnosed 1998-2004                  | IMD 2004 – Income Domain (5)               | APER vs AR                                                 |
| <b>Morris (2010)</b>           | Cancer Registration Data, HES.              | England                 | Colorectal  | All stages                      | Major resection for CRC in 1998-2004 | IMD 2004 – Income Domain (5)               | Liver Resection                                            |
| <b>Morris (2016)</b>           | Cancer Registration Data, HES, RTDS.        | England                 | Rectal      | All stages post major resection | Diagnosed 2009-2010                  | IMD – Income Domain (5)                    | Radiotherapy                                               |
| <b>Neal (2005)</b>             | National Survey of NHS Patients: Cancer     | England (Not Specified) | Colorectal  | Not recorded                    | Not recorded                         | Occupation (8)                             | System Interval                                            |
| <b>NCIN (2011)</b>             | Cancer Registration Data, HES.              | England                 | Colorectal  | All stages                      | Diagnosed 2004-2006                  | IMD – assumed (5)                          | Surgery                                                    |
| <b>NCRAS (2018)</b>            | Cancer Registration Data, HES, SACT.        | England                 | Colorectal  | All stages                      | Diagnosed 2013-2015                  | IMD 2015 – Income Domain (5)               | Chemotherapy<br>Radiotherapy<br>Surgery                    |
| <b>Nicholson (2012)</b>        | Clinical Audit Database.                    | West of Scotland        | Rectal      | All stages                      | Surgery in 2001-2005                 | Not recorded                               | APER vs AR                                                 |
| <b>Paterson (2014)</b>         | Southeast Scotland Cancer Network Database. | Southeast Scotland      | Colorectal  | All stages                      | Diagnosed 2003-2009                  | Scottish Index of Multiple Deprivation (5) | Chemotherapy<br>Radiotherapy<br>Surgery<br>System Interval |

## Appendix S7: Characteristics of Included Studies - CONTINUED

| First Author (Year)      | Data Source                                    | Region/Country         | Site       | Stage                | Years Studied                                                       | Measure of SES (No. Groups)             | Broad Outcome                   |
|--------------------------|------------------------------------------------|------------------------|------------|----------------------|---------------------------------------------------------------------|-----------------------------------------|---------------------------------|
| <b>Pearson (2019)</b>    | Cancer Registration Data, CWT, DID, HES, RtD.  | England                | Colorectal | All stages           | Diagnosed 2014-2015                                                 | IMD 2015 – Income Domain (5)            | System Interval                 |
| <b>Pitchforth (2002)</b> | Scottish Cancer Registration, SMR1.            | Scotland               | Colorectal | All stages (Assumed) | Diagnosed 1992-1996                                                 | Carstairs Index (4)                     | Chemotherapy                    |
| <b>Pollock (1998)</b>    | HES, ONS.                                      | Thames Region, England | Colorectal | Not recorded         | Inpatient FCE with a CRC diagnosis in the financial years 1992-1995 | Townsend Score (10)                     | Surgery                         |
| <b>Price (2020)</b>      | CPRD, Cancer Registration Data, ONS.           | England                | Colorectal | All stages (Assumed) | Diagnosed 2006-2017                                                 | Townsend Score 2001 (5)                 | System Interval                 |
| <b>Radwan (2016)</b>     | Swansea Pelvic Oncology Group Database.        | Swansea, Wales         | Rectal     | All stages           | Pelvic exenteration in 2006-2014                                    | Welsh Index of Multiple Deprivation (4) | Chemo – radiotherapy TPE vs PPE |
| <b>Raine (2010)</b>      | HES                                            | England                | Rectal     | All stages (Assumed) | Admission for rectal cancer surgery 1999-2006                       | IMD 2004 (5)                            | AR vs APER                      |
| <b>Redanial (2014)</b>   | Northern and Yorkshire and South West Offices. | England                | Colorectal | Dukes' Stages A/B    | Diagnosed 1996-2009                                                 | IMD 2007 – Income Domain (5)            | System Interval                 |
| <b>Saito [1] (2019)</b>  | Cancer Registration Data, HES, NBOCA.          | England                | Colorectal | All stages           | Diagnosed 2010-2013                                                 | IMD 2010 – Income Domain (5)            | Surgery                         |
| <b>Saito [2] (2021)</b>  | Cancer Registration Data, HES, NBOCA.          | England                | Colon      | All stages           | Diagnosed 2010-2013                                                 | IMD 2010 – Income Domain (5)            | System Interval                 |



**Appendix S7: Characteristics of Included Studies - CONTINUED**

| <b>First Author<br/>(Year)</b> | <b>Data Source</b>                                            | <b>Region/Country</b> | <b>Site</b> | <b>Stage</b> | <b>Years Studied</b>                                          | <b>Measure of SES<br/>(No. Groups)</b> | <b>Broad Outcome</b>                    |
|--------------------------------|---------------------------------------------------------------|-----------------------|-------------|--------------|---------------------------------------------------------------|----------------------------------------|-----------------------------------------|
| <b>Shack (2009)</b>            | Northwest and Merseyside and Cheshire Cancer Registries, HES. | Northwest England     | Colorectal  | All stages   | Diagnosed 1997-2004                                           | IMD 2001 – Income Domain (5)           | Chemotherapy<br>Surgery<br>Radiotherapy |
| <b>Smith (2006)</b>            | ACPGBI Bowel Cancer Database                                  | England               | Colorectal  | All stages   | Diagnosed 2001-2002                                           | Townsend Score 2001 (4)                | APER vs AR                              |
| <b>Taylor (2021)</b>           | CORECT-R, HES, SACT.                                          | England               | Colorectal  | Stage II-III | Diagnosed 2014-2015                                           | IMD 2010 – Income Domain (5)           | Chemotherapy                            |
| <b>Tilney (2008)</b>           | HES.                                                          | England               | Colorectal  | Not recorded | APER or AR surgery in 1996-2004                               | IMD 2004 (5)                           | APER vs AR                              |
| <b>Tilney (2009)</b>           | ACPGBI Bowel Cancer Database                                  | England               | Rectal      | Dukes' A-C   | Diagnosed in 2000-2005                                        | IMD 2004 (5)                           | APER vs AR                              |
| <b>Vallance (2018)</b>         | HES, NBOCA.                                                   | England               | Colorectal  | Stage IV     | Diagnosed 2011-2015 with synchronous liver-limited metastases | IMD (5)                                | Liver resection                         |

Abbreviations: ACPGBI Association of Coloproctology of Great Britain and Ireland, APER Abdominoperineal Resection, AR Anterior Resection, CORECT-R Colorectal Cancer Data Repository, CRC Colorectal Cancer, CPRD Clinical Practice Research Datalink, CWT National Cancer Waiting Times Dataset, DID Diagnostic Imaging Dataset, ECRIC Eastern Cancer Registration and Information Centre, FCE Finished Consultant Episode, HES hospital episode statistics, IMD index of multiple deprivation, NBOCA National Bowel Cancer Audit, NCIN National Cancer Intelligence Network, NCRAS National Cancer Registration and Analysis Service, OARS The Duke Older Americans Resources and Services Instrument, OMFAQ The OARS Multidimensional Functional Assessment Questionnaire, ONS Office for National Statistics, PPE Partial

Pelvic Exenteration, RtD Routes to Diagnosis, RTDS Radiotherapy Dataset, SACT systematic anti-cancer therapy dataset, SES socioeconomic status, SMR1 Scottish Morbidity Record-1, TCR Thames Cancer Registry, TPE Total Pelvic Exenteration.

## Appendix S8: Results of studies reporting variations in the system interval

| First Author<br>(Year)               | Number   | Adjusted for                                        | Outcome of Interest                         | Odds ratio (95% CI) or other<br>measure                                                                                                          | Effect of<br>deprivation on<br>interval length<br>[Longer↑ Shorter↓] | Strength<br>of<br>Evidence |
|--------------------------------------|----------|-----------------------------------------------------|---------------------------------------------|--------------------------------------------------------------------------------------------------------------------------------------------------|----------------------------------------------------------------------|----------------------------|
| <b>Benitez Majano<br/>(2022) [1]</b> | 2,115    | Age   Comorbidities   GP Visits  <br>Sex   Symptoms | First presentation to<br>diagnosis interval | Quantile Regression - 50 <sup>th</sup> centile*<br>Ref adj interval 126.0 (94.5,157.5) †<br>MD adj interval 204.1 days<br>(151.0,257.3)   p=0.04 | ↑                                                                    | Strong                     |
| <b>Benitez Majano<br/>(2022) [2]</b> | C: 3,215 | Age   Comorbidities   Sex  <br>Symptoms   Test Type | Test to diagnosis<br>interval               | Quantile Regression - 50 <sup>th</sup> centile*<br>LD ref group<br>MD adj coef 0.7<br>(-2.7,4.1)   p=0.729                                       | =                                                                    | Strong                     |
|                                      |          | Age   Comorbidities   Sex  <br>Symptoms             | First presentation to<br>diagnosis interval | Quantile Regression - 50 <sup>th</sup> centile*<br>LD ref group<br>MD adj coef 91.0<br>(21.0,161.0)   p=0.028                                    | ↑                                                                    |                            |
|                                      | R: 1,621 | Age   Comorbidities   Sex  <br>Symptoms   Test Type | Test to diagnosis<br>Interval               | Quantile Regression - 50 <sup>th</sup> centile*<br>LD ref group<br>MD adj coef 0.0<br>(-4,0.4)   p=1.00                                          | =                                                                    |                            |
|                                      |          | Age   Comorbidities   Sex  <br>Symptoms             | First presentation to<br>diagnosis interval | Quantile Regression - 50 <sup>th</sup> centile*<br>LD ref group<br>MD adj coef 78.8<br>(14.8,142.7)   p=0.258                                    | =                                                                    |                            |

## Appendix S8: Results of studies reporting variations in the system interval – CONTINUED

| First Author (Year)       | Number  | Adjusted for                           | Outcome of Interest                                     | Odds ratio (95% CI) or other measure                           | Effect of deprivation on interval length [Longer↑ Shorter↓] | Strength of Evidence |
|---------------------------|---------|----------------------------------------|---------------------------------------------------------|----------------------------------------------------------------|-------------------------------------------------------------|----------------------|
| <b>Campbell (2002)</b>    | 653     | Distance   Presentation   Stage        | Referral to treatment interval                          | Cox Regression<br>LD HR 1.0<br>MD adjusted HR 1.24 (0.93,1.67) | =                                                           | Weak                 |
| <b>Di Girolamo (2018)</b> | 50,955  | No adjustment                          | Referral to first seen interval [Within 2 weeks Y/N]    | (Derived)<br>LD OR 1.0<br>MD OR 0.80 (0.70-0.91)               | ↑                                                           | Strong               |
|                           | 46,702  |                                        | Referral to treatment interval [Within 62 days Y/N]     | (Derived)<br>LD OR 1.0<br>MD OR 1.02 (0.95-1.10)               | =                                                           |                      |
|                           | 116,177 |                                        | Diagnosis to treatment interval [Within 31 days Y/N]    | (Derived)<br>LD OR 1.0<br>MD OR 1.28 (1.14-1.44)               | ↓                                                           |                      |
| <b>Hayes (2021)</b>       | 19,798  | Age   Site   Stage                     | Referral to first seen interval [Within 2 weeks Y/N]    | LD OR 1.0<br>MD adjusted OR 0.95 (0.87,1.03)                   | =                                                           | Strong               |
|                           | 29,445  | Age   First Treatment   Sex   Stage    | Diagnosis to treatment interval [Within 31 days Y/N]    | LD OR 1.0<br>MD adjusted OR 0.91 (0.84,0.98)                   | ↑                                                           |                      |
|                           | 17,622  | Age   First Treatment   Stage   Others | Referral to treatment interval [Within 62 days Y/N]     | LD OR 1.0<br>MD adjusted OR 0.82 (0.74,0.91)                   | ↑                                                           |                      |
| <b>Lejeune (2010)</b>     | 71,917  | Age   Stage                            | Diagnosis to treatment interval [Within 1 week Y/N]     | LD OR 1.0<br>MD adjusted OR 0.78 (0.72,0.84)                   | ↑                                                           | Moderate             |
|                           |         |                                        | Diagnosis to treatment interval [Within 1 month Y/N]    | LD OR 1.0<br>MD adjusted OR 0.84 (0.78,0.90)                   | ↑                                                           |                      |
|                           |         |                                        | Diagnosis to treatment interval [Within 2-3 months Y/N] | LD OR 1.0<br>MD adjusted OR 0.91 (0.85,0.98)                   | ↑                                                           |                      |
|                           |         |                                        | Diagnosis to treatment interval [Within 4-6 months Y/N] | LD OR 1.0<br>MD adjusted OR 1.07 (0.96,1.18)                   | =                                                           |                      |

## Appendix S8: Results of studies reporting variations in the system interval - CONTINUED

| First Author (Year) | Number  | Adjusted for                                                                     | Outcome of Interest                                                                                | Odds ratio (95% CI) or other measure                                             | Effect of deprivation on interval length [Longer↑ Shorter↓] | Strength of Evidence |
|---------------------|---------|----------------------------------------------------------------------------------|----------------------------------------------------------------------------------------------------|----------------------------------------------------------------------------------|-------------------------------------------------------------|----------------------|
| Neal (2005)         | 15,891  | Age   Ethnicity   Marital Status   Sex                                           | Symptom to diagnosis interval                                                                      | Generalised linear modelling<br>Nonsignificant result                            | =                                                           | Weak                 |
|                     |         |                                                                                  | Referral to first seen interval                                                                    | Generalised linear modelling<br>Nonsignificant result                            | =                                                           |                      |
|                     |         |                                                                                  | First seen to diagnosis interval                                                                   | Generalised linear modelling<br>F(7) = 2.247, p=0.028                            | o                                                           |                      |
| Paterson (2014)     | 4,915   | Unadjusted                                                                       | Referral to treatment interval [Within 62 days Y/N]                                                | (Derived)<br>LD OR 1.0<br>MD OR 1.14 (0.93-1.39)                                 | =                                                           | Weak                 |
| Pearson (2019)      | 63,958  | Age   Comorbidities   Ethnicity   Investigations   Presentation   Sex   Stage    | Secondary care diagnostic interval [Interval longer than the median Y/N]                           | LD OR 1.0<br>MD adjusted OR 1.07 (1.00,1.13)                                     | =                                                           | Strong               |
| Price (2020)        | Unknown | Age   Sex   Time Period                                                          | First presentation to diagnosis interval                                                           | Pre-post difference-in-differences<br>MD coef 0.1<br>(-0.03,0.2, p=0.147)        | =                                                           | Strong               |
|                     |         |                                                                                  |                                                                                                    | Event-study difference-in-differences<br>MD coef 0.069<br>(0.002,0.136, p=0.043) | ↑                                                           |                      |
|                     |         |                                                                                  |                                                                                                    | Semiparametric varying-coefficient analyses<br>Significant association           | ↑                                                           |                      |
| Redanial (2014)     | 46,511  | Age   Ethnicity   Grade   Morphology   Region   Sex   Site   Stage   Time Period | Diagnosis to Treatment Interval [Amongst patients who had a resection within 62 days of diagnosis] | Linear Regression<br>LD coef 0.00<br>MD adj coef 0.21<br>(-0.55,0.98)            | =                                                           | Strong               |

**Appendix S8: Results of studies reporting variations in the system interval - CONTINUED**

| First Author<br>(Year)     | Number | Adjusted for                                                                                              | Outcome of Interest                                                                                                         | Odds ratio (95% CI) or other<br>measure                                                          | Effect of deprivation<br>on interval length<br>[Longer↑ Shorter↓] | Strength<br>of<br>Evidence |
|----------------------------|--------|-----------------------------------------------------------------------------------------------------------|-----------------------------------------------------------------------------------------------------------------------------|--------------------------------------------------------------------------------------------------|-------------------------------------------------------------------|----------------------------|
| <b>Saito (2021)</b><br>[2] | 28,452 | Age   Comorbidities   Grade<br>  Morphology   Presentation  <br>Sex   Site   Stage   Year of<br>Diagnosis | Diagnosis to Treatment Interval<br>[Time from diagnosis to major<br>resection amongst patients who had<br>elective surgery] | Linear Regression<br>LD adjusted coefficient 1.00<br>MD adjusted coefficient 0.99<br>(0.97,1.02) | =                                                                 | Strong                     |

Abbreviations: Adj adjusted, C colon, Coef coefficient, GP general practitioner, LD least deprived, MD most deprived, R rectal, Ref reference group.

\*Results also presented for the 75<sup>th</sup> centile

†The reference group was men aged 55 to 64 years old in the least deprived group with no recorded comorbidities or mental health morbidities and who had rectal bleeding or a change in bowel habit.

## Legend

|                        |                        |                                            |                                    |
|------------------------|------------------------|--------------------------------------------|------------------------------------|
| ↑ Increased likelihood | ↓ Decreased likelihood | = No significant difference between groups | ° Significant association observed |
|------------------------|------------------------|--------------------------------------------|------------------------------------|

**Appendix S9: Results – Likelihood of receipt of surgery**

| First Author (Year)     | Treatment Given Within                     | Number  | Adjusted for                                                                   | Outcome of Interest                                         | Odds Ratio /Likelihood               | 95% CI (p-value)       | Effect of Deprivation on Odds of Surgery | Strength of Evidence |
|-------------------------|--------------------------------------------|---------|--------------------------------------------------------------------------------|-------------------------------------------------------------|--------------------------------------|------------------------|------------------------------------------|----------------------|
| <b>Bharathan (2011)</b> | Not recorded                               | 8,159   | Unadjusted                                                                     | Receipt of surgery [NS] (assumed part of primary treatment) | (Derived)<br>LD OR 1.0<br>MD OR 0.71 | (Derived)<br>0.51-0.97 | ↓                                        | Weak                 |
| <b>Campbell (2002)</b>  | 1 year of diagnosis                        | 653     | Age   Distance   Stage                                                         | Receipt of surgery [NS] (assumed part of primary treatment) | LD OR 1.0<br>MD OR 0.52              | 0.14-1.87              | =                                        | Weak                 |
| <b>Fenton (2019)</b>    | 3 years of primary colorectal resection    | 157,383 | Age   Comorbidities   Sex   Site   Liver Centre   Stage   Year of Resection    | Receipt of Liver Resection                                  | LD OR 1.0<br>MD OR 0.76              | 0.70-0.83              | ↓                                        | Strong               |
| <b>Fenton (2021)</b>    | 3 years of primary colorectal resection    | 80,869  | Age   Comorbidities   Sex   Site   Thoracic Centre   Stage   Year of Resection | Receipt of Pulmonary Resection                              | LD OR 1.0<br>MD OR 1.04              | 0.89-1.22              | =                                        | Strong               |
| <b>Harris (2009)</b>    | Received during the study period (assumed) | 477     | Unadjusted                                                                     | Receipt of surgery [NS] (assumed part of primary treatment) | (Derived)<br>LD OR 1.0<br>MD OR 0.32 | (Derived)<br>0.13-0.72 | ↓                                        | Weak                 |
| <b>Hayes (2019)</b>     | 12 months of diagnosis (assumed)           | 31,910  | Age   Comorbidities   Sex   Stage   Year of Diagnosis                          | Receipt of surgery [NS] (assumed part of primary treatment) | LD OR 1.0<br>MD OR 0.62              | 0.55-0.70              | ↓                                        | Strong               |

**Appendix S9: Results – Likelihood of receipt of surgery - CONTINUED**

| First Author (Year)    | Treatment Given Within                         | Number    | Adjusted for                                                 | Outcome of Interest                                         | Odds Ratio /Likelihood                    | 95% CI (p-value)          | Effect of Deprivation on Odds of Surgery | Strength of Evidence |
|------------------------|------------------------------------------------|-----------|--------------------------------------------------------------|-------------------------------------------------------------|-------------------------------------------|---------------------------|------------------------------------------|----------------------|
| <b>Jones (2008)</b>    | Received during the study period (assumed)     | C: 16,850 | Age   Sex   Stage   Time to Hospital                         | Receipt of surgery [NS] (assumed part of primary treatment) | C: OR 0.99 (for a 1 unit increase in IMD) | C: 0.99-1.0               | ↓                                        | Weak                 |
|                        |                                                | R: 11,406 |                                                              |                                                             | R: OR 0.99 (for a 1 unit increase in IMD) | R: 0.98-0.99              | ↓                                        |                      |
| <b>Morris (2010)</b>   | 3 years of primary colorectal resection        | 114,155   | Age   Comorbidities   Sex   Site   Stage   Year of Resection | Receipt of Liver Resection                                  | LD OR 1.0<br>MD OR 0.70                   | 0.61-0.80                 | ↓                                        | Strong               |
| <b>NCIN (2011)</b>     | 30 days before diagnosis to 6 months after     | 80,690    | Unadjusted                                                   | Receipt of major resection                                  | (Derived)<br>LD OR 1.0<br>MD OR 0.84      | (Derived)<br>0.80-0.88    | ↓                                        | Weak                 |
| <b>NCRAS (2018)</b>    | C: 30 days before diagnosis to 6 months after  | 75,552    | Unadjusted                                                   | Receipt of major resection                                  | C: (Derived)<br>LD OR 1.0<br>MD OR 0.76   | C: (Derived)<br>0.72-0.80 | ↓                                        | Moderate             |
|                        | R: 30 days before diagnosis to 12 months after | 28,136    |                                                              |                                                             | R: (Derived)<br>LD OR 1.0<br>MD OR 0.66   | R: (Derived)<br>0.61-0.72 | ↓                                        |                      |
| <b>Paterson (2014)</b> | Not recorded                                   | 4,915     | Age   Region   Sex   Site   Stage                            | Receipt of surgery [NS] (assumed part of primary treatment) | LD OR 1.23<br>MD OR 1.0                   | 0.96-1.58                 | =                                        | Weak                 |



## Appendix S9: Results – Likelihood of receipt of surgery - CONTINUED

| First Author (Year)               | Treatment Given Within                     | Number           | Adjusted for                                                                                    | Outcome of Interest                                                                                             | Odds Ratio /Likelihood     | 95% CI (p-value) | Effect of Deprivation on Odds of Surgery | Strength of Evidence |
|-----------------------------------|--------------------------------------------|------------------|-------------------------------------------------------------------------------------------------|-----------------------------------------------------------------------------------------------------------------|----------------------------|------------------|------------------------------------------|----------------------|
| <b>Pollock and Vickers (1998)</b> | Received during the study period           | 25,304 (assumed) | Age   Sex                                                                                       | Finished consultant episode that included therapeutic or palliative surgery (assumed part of primary treatment) | LD OR 1.0<br>MD OR 0.88    | 0.78-1.00        | =                                        | Weak                 |
| <b>Saito (2019) [1]</b>           | 30 days before diagnosis to 180 days after | C: 38,624        | Age   Comorbidities   Grade   Histology   Presentation   Sex   Site   Stage   Year of Diagnosis | Receipt of major resection [Odds of <i>not</i> receiving major surgery]                                         | C: LD OR 1.0<br>MD OR 0.96 | C: 0.87-1.07     | =                                        | Strong               |
|                                   |                                            | R: 22,630        |                                                                                                 |                                                                                                                 | R: LD OR 1.0<br>MD OR 1.35 | R: 1.22-1.49     | ↓                                        |                      |
| <b>Shack (2009)</b>               | 6 months of diagnosis                      | 29,563           | Age   Comorbidities   Sex   Site   Stage                                                        | Receipt of major resection                                                                                      | LD OR 1.0<br>MD OR 1.63    | 1.17-2.26        | ↑                                        | Strong               |
| <b>Vallance (2018)</b>            | 1 year of CRC diagnosis                    | 13,656           | Age   Comorbidities   Presentation   Sex   Site   Liver Centre   Stage                          | Receipt of Liver Resection                                                                                      | LD OR 1.42<br>MD OR 1.0    | 1.18-1.70        | ↓                                        | Strong               |

Abbreviations: C colon cancer, CI confidence interval, CRC colorectal cancer, LD least deprived, MD most deprived, NS not specified, OR odds ratio, R rectal cancer.

## Legend

|                        |                        |                                            |
|------------------------|------------------------|--------------------------------------------|
| ↑ Increased likelihood | ↓ Decreased likelihood | = No significant difference between groups |
|------------------------|------------------------|--------------------------------------------|

### Appendix S10: Likelihood of surgical variation - forest plot

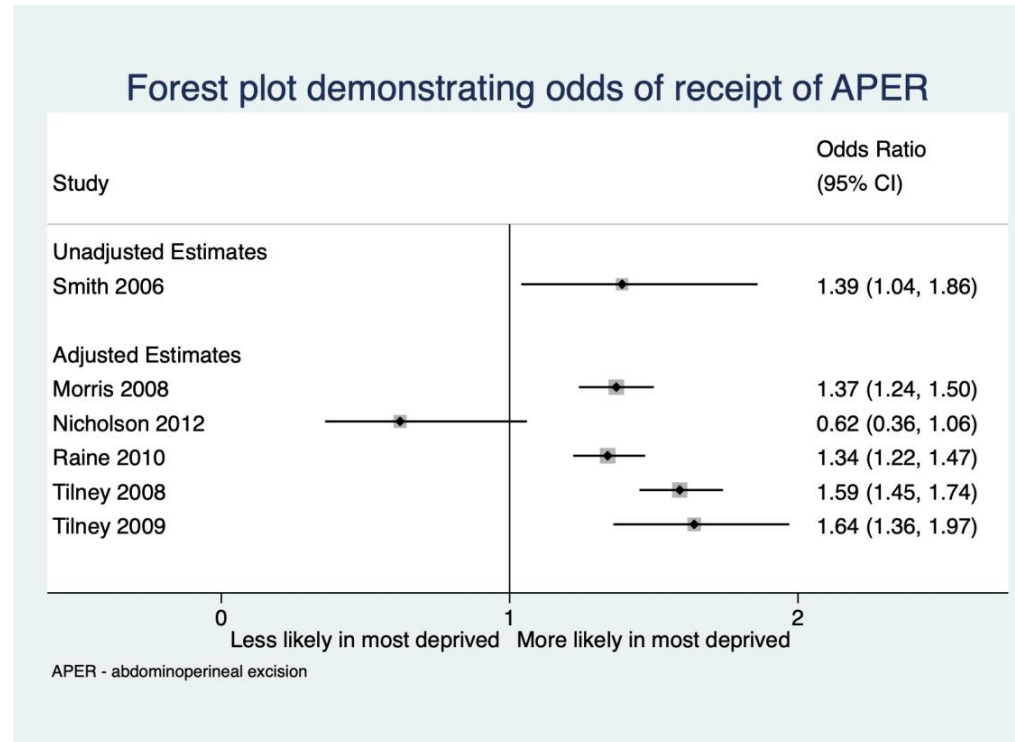

Forest plot demonstrating the odds of receipt of abdominoperineal excision of the rectum versus anterior resection in the most deprived versus the least deprived patient group.

**Appendix S11: Results – Likelihood of surgical variation**

| First Author<br>(Year)  | Number | Adjusted for                                                                           | Outcome of Interest                                         | Odds Ratio<br>/Likelihood            | 95% CI<br>(p-value)    | Effect of Deprivation on<br>Odds of APER vs AR<br>unless otherwise stated | Strength of<br>Evidence |
|-------------------------|--------|----------------------------------------------------------------------------------------|-------------------------------------------------------------|--------------------------------------|------------------------|---------------------------------------------------------------------------|-------------------------|
| <b>Morris (2008)</b>    | 26,097 | Age   Sex   Year of Diagnosis  <br>Stage   Surgeon Workload  <br>Presentation          | Abdominoperineal Excision<br>vs Anterior Resection          | LD OR 1.0<br>MD OR 1.37              | 1.24-1.50              | ↑                                                                         | Strong                  |
| <b>Nicholson (2012)</b> | 1,574  | Age   Stage   Sex   Surgeon<br>Workload   Presentation   Year of<br>Diagnosis   Others | Abdominoperineal Excision<br>vs Anterior Resection          | LD OR 1.0<br>MD OR 0.62              | 0.36-1.06              | =                                                                         | Weak                    |
| <b>Radwan (2016)</b>    | 120    | Unadjusted                                                                             | Total Pelvic Exenteration vs<br>Partial Pelvic Exenteration | (Derived)<br>LD OR 1.0<br>MD OR 1.75 | (Derived)<br>0.55-5.68 | =<br>[odds of TPE]                                                        | Weak                    |
| <b>Raine (2010)</b>     | 29,214 | Age   Presentation   Sex   Year of<br>Resection                                        | Anterior Resection vs<br>Abdominoperineal Excision          | LD OR 1.34<br>MD OR 1.0              | 1.22-1.47              | ↑                                                                         | Weak                    |
| <b>Smith (2006)</b>     | 2,389  | Unadjusted                                                                             | Abdominoperineal Excision<br>vs Anterior Resection          | (Derived)<br>LD OR 1.0<br>MD OR 1.39 | (Derived)<br>1.04-1.86 | ↑                                                                         | Weak                    |
| <b>Tilney (2008)</b>    | 52,643 | Age   Presentation   Sex   Year of<br>Resection                                        | Abdominoperineal Excision<br>vs Anterior Resection          | LD OR 1.0<br>MD OR 1.59              | 1.45-1.74              | ↑                                                                         | Weak                    |
| <b>Tilney (2009)</b>    | 12,128 | Neoadjuvant Therapy   Sex   Year                                                       | Abdominoperineal Excision<br>vs Anterior Resection          | LD OR 1.0<br>MD OR 1.64              | 1.36-1.97              | ↑                                                                         | Weak                    |

Abbreviations: APER Abdominoperineal Excision, AR Anterior Resection, CI confidence interval, LD least deprived, MD most deprived, OR odds ratio, TPE Total Pelvic Exenteration.

Legend

|                        |                        |                                            |
|------------------------|------------------------|--------------------------------------------|
| ↑ Increased likelihood | ↓ Decreased likelihood | = No significant difference between groups |
|------------------------|------------------------|--------------------------------------------|

## Appendix S12: Likelihood of receipt of chemotherapy – forest plot

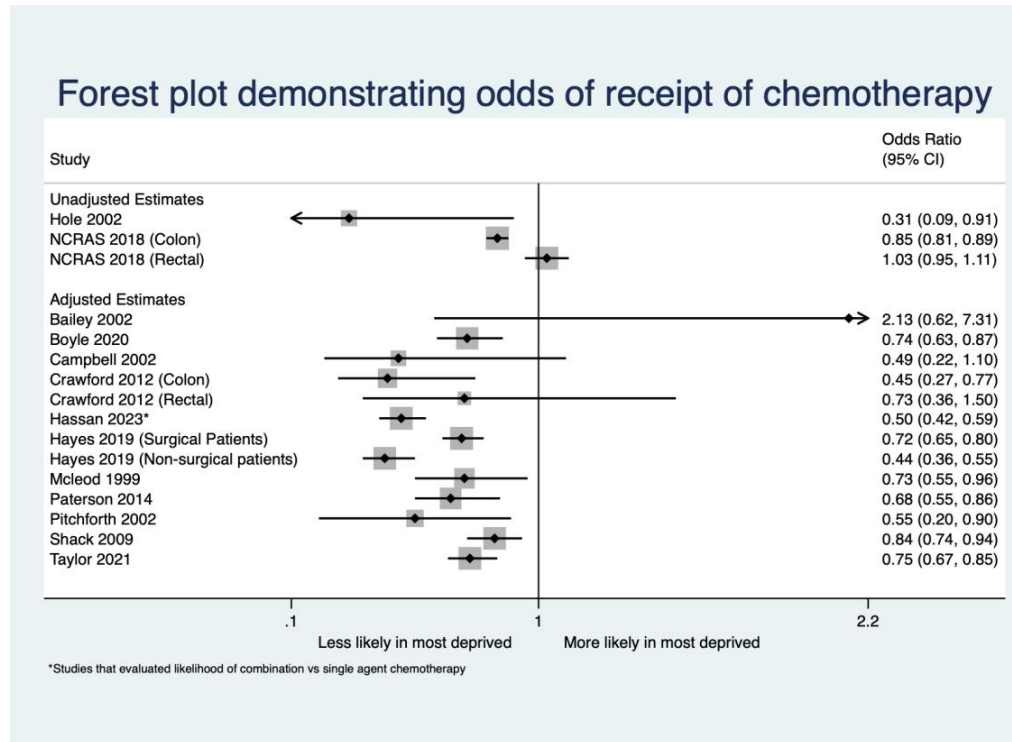

Forest plot demonstrating the odds of receipt of chemotherapy in the most deprived versus the least deprived patient group.

**Appendix S13: Results – Likelihood of receipt of chemotherapy**

| First Author (Year)    | Treatment Given Within           | Number  | Adjusted for                                                                      | Outcome of Interest                                 | Odds Ratio /Likelihood                                                    | 95% CI (p-value) | Effect of Deprivation on Odds of Chemotherapy | Strength of Evidence |
|------------------------|----------------------------------|---------|-----------------------------------------------------------------------------------|-----------------------------------------------------|---------------------------------------------------------------------------|------------------|-----------------------------------------------|----------------------|
| <b>Bailey (2002)</b>   | Not recorded                     | 119     | Age   Social Resources Rating                                                     | Receipt of adjuvant chemotherapy                    | Excellent/good economic resources OR 1.0<br>Mild/total impairment OR 2.13 | 0.62-7.31        | =                                             | Weak                 |
| <b>Boyle (2020)</b>    | 4 months of surgery              | 11,932  | Access   Age   ASA   Comorbidities   Fitness   Readmission   Sex   Stage   Others | Receipt of adjuvant chemotherapy                    | LD OR 1.36<br>MD OR 1.0                                                   | 1.15-1.60        | ↓                                             | Strong               |
| <b>Campbell (2002)</b> | 1 year of diagnosis              | 653     | Age   Distance   Presentation   Region   Stage                                    | Receipt of chemotherapy                             | LD OR 1.0<br>MD OR 0.49                                                   | 0.22-1.10        | =                                             | Weak                 |
| <b>Crawford (2012)</b> | 6 months of diagnosis            | Unknown | Age   Sex   Stage                                                                 | Receipt of chemotherapy in stage IV disease         | C: LD OR 1.0<br>MD OR 0.45                                                | C: 0.27-0.77     | ↓                                             | Weak                 |
|                        |                                  |         |                                                                                   |                                                     | R: LD OR 1.0<br>MD OR 0.73                                                | R: 0.36-1.50     | =                                             |                      |
| <b>Hassan (2023)</b>   | 4 months of surgery              | 8,750   | Age   Ethnicity   No. nodes   Sex   Size   Year of Diagnosis                      | Receipt of combination vs single agent chemotherapy | LD OR 1.0<br>MD OR 0.50                                                   | 0.42-0.59        | ↓                                             | Strong               |
| <b>Hayes (2019)</b>    | 12 months of diagnosis (assumed) | 24,263  | Age   Comorbidities   Sex   Stage   Year of Diagnosis                             | Chemotherapy in surgical patients                   | LD OR 1.0<br>MD OR 0.72                                                   | 0.65-0.80        | ↓                                             | Strong               |
|                        |                                  | 7,647   |                                                                                   | Chemotherapy in non-surgical patients               | LD OR 1.0<br>MD OR 0.44                                                   | 0.36-0.55        | ↓                                             |                      |

## Appendix S13: Results – Likelihood of receipt of chemotherapy - CONTINUED

| First Author (Year)    | Treatment Given Within                      | Number    | Adjusted for                                                                       | Outcome of Interest                                 | Odds Ratio /Likelihood                       | 95% CI (p-value)       | Effect of Deprivation on Odds of Chemotherapy | Strength of Evidence |
|------------------------|---------------------------------------------|-----------|------------------------------------------------------------------------------------|-----------------------------------------------------|----------------------------------------------|------------------------|-----------------------------------------------|----------------------|
| <b>Hole (2002)</b>     | Received during the study period (assumed)  | 2,269     | Unadjusted                                                                         | Receipt of adjuvant therapy (presumed chemotherapy) | (Derived)<br>LD OR 1.0<br>MD OR 0.31         | (Derived)<br>0.09-0.91 | ↓                                             | Weak                 |
| <b>Jones (2008)</b>    | Received during the study period (assumed)  | C: 16,850 | Age   Sex   Stage   Time to Hospital                                               | Receipt of chemotherapy                             | C: OR 0.99<br>(for a 1 unit increase in IMD) | C: 0.98-0.99           | ↓                                             | Weak                 |
|                        |                                             | R: 11,406 |                                                                                    |                                                     | R: OR 0.99<br>(for a 1 unit increase in IMD) | R: 0.99-1.0            | ↓                                             |                      |
| <b>McLeod (1999)</b>   | 6 months from the first admission           | 7,852     | Age   Comorbidities   Death   Marital Status   Presentation   Rural   Sex   Others | Receipt of chemotherapy                             | LD OR 1.0<br>MD OR 0.73                      | 0.55-0.96              | ↓                                             | Weak                 |
| <b>NCRAS (2018)</b>    | 31 days before diagnosis to 12 months after | C: 75,552 | Unadjusted                                                                         | Receipt of chemotherapy                             | C: (Derived)<br>LD OR 1.0<br>MD OR 0.85      | 0.81-0.89              | ↓                                             | Moderate             |
|                        |                                             | R: 28,136 |                                                                                    |                                                     | R: (Derived)<br>LD OR 1.0<br>MD OR 1.03      | 0.95-1.11              | =                                             |                      |
| <b>Paterson (2014)</b> | Not recorded                                | 4,915     | Age   Metastatic Disease   Region   Sex   Site                                     | Receipt of chemotherapy                             | LD OR 1.46<br>MD OR 1.0                      | 1.16-1.83              | ↓                                             | Weak                 |

**Appendix S13: Results – Likelihood of receipt of chemotherapy - CONTINUED**

| First Author (Year)      | Treatment Given Within            | Number | Adjusted for                                                             | Outcome of Interest              | Odds Ratio /Likelihood  | 95% CI (p-value) | Effect of Deprivation on Odds of Chemotherapy | Strength of Evidence |
|--------------------------|-----------------------------------|--------|--------------------------------------------------------------------------|----------------------------------|-------------------------|------------------|-----------------------------------------------|----------------------|
| <b>Pitchforth (2002)</b> | 6 months from the first admission | 7,303  | Age   Comorbidities   Death   Presentation   Rural   Sex   Cancer Centre | Receipt of chemotherapy          | LD OR 1.0<br>MD OR 0.55 | 0.20-0.90        | ↓                                             | Weak                 |
| <b>Shack (2009)</b>      | 6 months of diagnosis             | 29,563 | Age   Comorbidities   Sex   Site   Stage                                 | Receipt of chemotherapy          | LD OR 1.0<br>MD OR 0.84 | 0.74-0.94        | ↓                                             | Strong               |
| <b>Taylor (2021)</b>     | 6 months of surgery               | 23,402 | Age   Comorbidities   Sex   Stage                                        | Receipt of adjuvant chemotherapy | LD OR 1.0<br>MD OR 0.75 | 0.67-0.85        | ↓                                             | Strong               |

Abbreviations: ASA American Society of Anaesthesiologists grade, CI confidence interval, C colon, LD least deprived, MD most deprived, OR odds ratio, R rectum.

Legend

|                        |                        |                                            |
|------------------------|------------------------|--------------------------------------------|
| ↑ Increased likelihood | ↓ Decreased likelihood | = No significant difference between groups |
|------------------------|------------------------|--------------------------------------------|

**Appendix S14: Likelihood of receipt of radiotherapy – forest plot**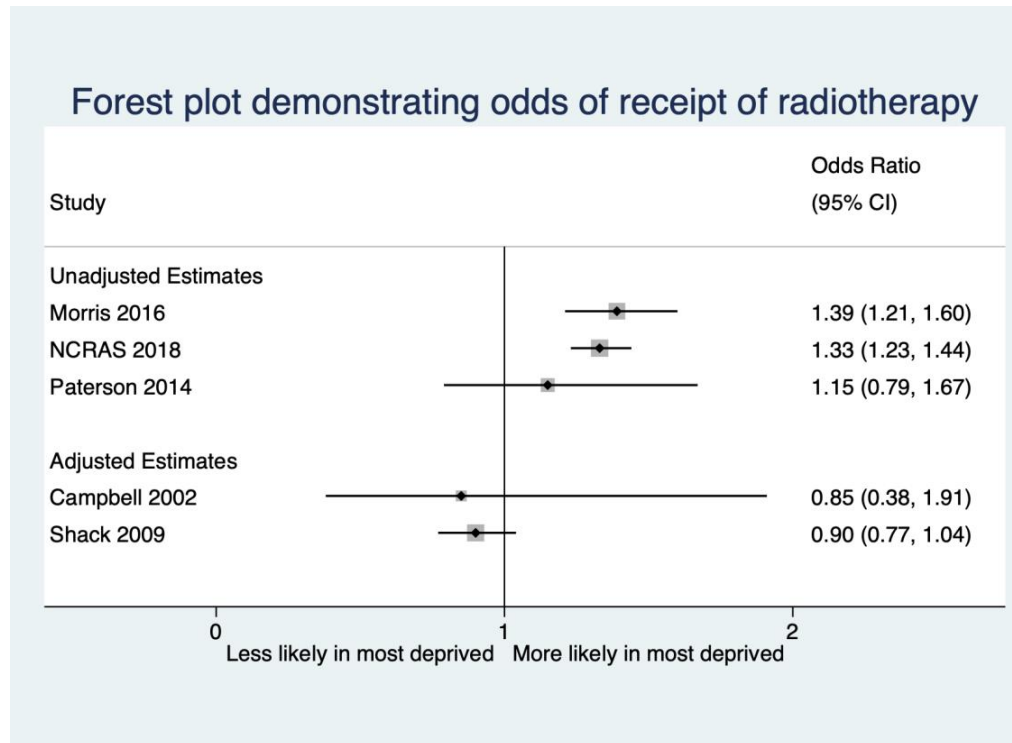

Forest plot demonstrating the odds of receipt of radiotherapy in the most deprived versus the least deprived patient group.



**Appendix S15: Results – Likelihood of receipt of radiotherapy**

| First Author (Year)    | Treatment Given Within                      | Number | Adjusted for                         | Outcome of Interest                            | Odds Ratio /Likelihood                    | 95% CI (p-value)       | Effect of Deprivation on Odds of Radiotherapy | Strength of Evidence |
|------------------------|---------------------------------------------|--------|--------------------------------------|------------------------------------------------|-------------------------------------------|------------------------|-----------------------------------------------|----------------------|
| <b>Campbell (2002)</b> | 1 year of diagnosis                         | 653    | Age   Distance   Site   Stage        | Receipt of radiotherapy                        | LD OR 1.0<br>MD OR 0.85                   | 0.38-1.91              | =                                             | Weak                 |
| <b>Jones (2008)</b>    | Received during the study period (assumed)  | 11,406 | Age   Sex   Stage   Time to Hospital | Receipt of radiotherapy (rectal cancer cohort) | OR 0.99<br>(for a 1 unit increase in IMD) | 0.99-1.0               | =                                             | Weak                 |
| <b>Morris (2016)</b>   | 1 year of surgery                           | 9,201  | Unadjusted                           | Receipt of radiotherapy                        | (Derived)<br>LD OR 1.0<br>MD OR 1.39      | (Derived)<br>1.21-1.60 | ↑                                             | Weak                 |
| <b>NCRAS (2018)</b>    | 31 days before diagnosis to 12 months after | 28,136 | Unadjusted                           | Receipt of radiotherapy                        | (Derived)<br>LD OR 1.0<br>MD OR 1.33      | (Derived)<br>1.23-1.44 | ↑                                             | Moderate             |
| <b>Paterson (2014)</b> | Not recorded                                | 1,345  | Unadjusted                           | Receipt of neoadjuvant radiotherapy            | (Derived)<br>LD OR 1.0<br>MD OR 1.15      | (Derived)<br>0.79-1.67 | =                                             | Weak                 |
| <b>Radwan (2016)</b>   | Received during the study period (assumed)  | 120    | Unadjusted                           | Receipt of neoadjuvant chemoradiotherapy       | (Derived)<br>LD OR 1.0<br>MD OR 1.0       | N/A                    | =                                             | Weak                 |
| <b>Shack (2009)</b>    | 6 months of diagnosis                       | 29,563 | Age   Comorbidities   Sex   Stage    | Receipt of radiotherapy                        | LD OR 1.0<br>MD OR 0.90                   | 0.77-1.04              | =                                             | Strong               |

Abbreviations: CI confidence interval, LD least deprived, MD most deprived, OR odds ratio.

## Legend

|                        |                        |                                            |
|------------------------|------------------------|--------------------------------------------|
| ↑ Increased likelihood | ↓ Decreased likelihood | = No significant difference between groups |
|------------------------|------------------------|--------------------------------------------|

**Appendix S16: Results – Likelihood of receipt of any treatment**

| First Author (Year)    | Treatment Given Within             | Number    | Adjusted for      | Outcome of Interest                                                        | Odds Ratio /Likelihood     | 95% CI (p-value) | Effect of Deprivation on Odds of Any Treatment | Strength of Evidence |
|------------------------|------------------------------------|-----------|-------------------|----------------------------------------------------------------------------|----------------------------|------------------|------------------------------------------------|----------------------|
| <b>Crawford (2012)</b> | 6 months of diagnosis              | C: 11,163 | Age   Sex   Stage | Receipt of any treatment (chemotherapy, radiotherapy, surgery NS)          | C: LD OR 1.0<br>MD OR 0.54 | C: 0.39-0.76     | ↓                                              | Weak                 |
|                        |                                    | R: 7,058  |                   |                                                                            | R: LD OR 1.0<br>MD OR 0.54 | R: 0.34-0.84     | ↓                                              |                      |
| <b>Lejeune (2010)</b>  | 6 months of first contact with NHS | 71,917    | Age   Stage       | Receipt of any treatment (presumed surgery, chemotherapy, radiotherapy NS) | LD OR 1.0<br>MD OR 0.87    | 0.82-0.92        | ↓                                              | Moderate             |

Abbreviations: C colon, CI confidence interval, LD least deprived, MD most deprived, NHS National Health Service, NS not specified, OR odds ratio, R rectal.

## Legend

|                        |                        |                                            |
|------------------------|------------------------|--------------------------------------------|
| ↑ Increased likelihood | ↓ Decreased likelihood | = No significant difference between groups |
|------------------------|------------------------|--------------------------------------------|

## References

- 1 Page, M. *et al.* The PRISMA 2020 statement: An updated guideline for reporting systematic reviews. In: (2020).
- 2 Bailey, C. *et al.* Treatment decisions in older patients with colorectal cancer: the role of age and multidimensional function. *European Journal of Cancer Care* **12**, 257-262 (2003).
- 3 Hayes, L. *et al.* Age-related inequalities in colon cancer treatment persist over time: a population-based analysis. *Journal of Epidemiology and Community Health* **73**, 34 (2019).
- 4 Hayes, L. *et al.* Age-related and socioeconomic inequalities in timeliness of referral and start of treatment in colorectal cancer: a population-based analysis. *Journal of Epidemiology and Community Health* **75**, 1 (2021).
- 5 Shack, L. *What factors influence socioeconomic inequalities in colorectal cancer survival? PhD Thesis.* PhD Thesis thesis, London School of Hygiene and Tropical Medicine, (2009).
- 6 Saito, M. K., Quaresma, M., Fowler, H., Majano, S. B. & Rachet, B. Exploring socioeconomic differences in surgery and in time to elective surgery for colon cancer in England: Population-based study. *Cancer Epidemiology* **71**, 101896 (2021).
- 7 Pollock, A. M. & Vickers, N. Deprivation and emergency admissions for cancers of colorectum, lung, and breast in south east England: ecological study. *BMJ* **317**, 245 (1998).
- 8 Jones, A. P. *et al.* Travel time to hospital and treatment for breast, colon, rectum, lung, ovary and prostate cancer. *European Journal of Cancer* **44**, 992-999 (2008).
- 9 Lejeune, C. *et al.* Socio-economic disparities in access to treatment and their impact on colorectal cancer survival. *International Journal of Epidemiology* **39**, 710-717 (2010).
- 10 Di Girolamo, C. *et al.* Can we assess Cancer Waiting Time targets with cancer survival? A population-based study of individually linked data from the National Cancer Waiting Times monitoring dataset in England, 2009-2013. *PLOS ONE* **13**, e0201288 (2018).
- 11 Price, S., Zhang, X. & Spencer, A. Measuring the impact of national guidelines: What methods can be used to uncover time-varying effects for healthcare evaluations? *Social Science & Medicine* **258**, 113021 (2020).
- 12 Neal, R. D. & Allgar, V. L. Sociodemographic factors and delays in the diagnosis of six cancers: analysis of data from the 'National Survey of NHS Patients: Cancer'. *British Journal of Cancer* **92**, 1971-1975 (2005).
- 13 Pearson, C. *et al.* Establishing population-based surveillance of diagnostic timeliness using linked cancer registry and administrative data for patients with colorectal and lung cancer. *Cancer Epidemiology* **61**, 111-118 (2019).
- 14 Morris, E. *et al.* Unacceptable variation in abdominoperineal excision rates for rectal cancer: time to intervene? *Gut* **57**, 1690 (2008).
- 15 Morris, E. J. *et al.* Surgical management and outcomes of colorectal cancer liver metastases. *British Journal of Surgery* **97**, 1110-1118 (2010).
- 16 Morris, E. J. A. *et al.* Wide Variation in the Use of Radiotherapy in the Management of Surgically Treated Rectal Cancer Across the English National Health Service. *Clinical Oncology* **28**, 522-531 (2016).

- 17 Boyle, J. M. *et al.* Determinants of Variation in the Use of Adjuvant Chemotherapy for Stage III Colon Cancer in England. *Clinical Oncology* **32**, e135-e144 (2020).
- 18 Crawford, S. M., Sauerzapf, V., Haynes, R., Forman, D. & Jones, A. P. Social and geographical factors affecting access to treatment of colorectal cancer: a cancer registry study. *BMJ Open* **2**, e000410 (2012).
- 19 Vallance, A. E. *et al.* Socioeconomic differences in selection for liver resection in metastatic colorectal cancer and the impact on survival. *European Journal of Surgical Oncology* **44**, 1588-1594 (2018).
- 20 Fenton, H. M. *et al.* Variation in the Use of Resection for Colorectal Cancer Liver Metastases. *Ann Surg* **270**, 892-898 (2019).
- 21 Fenton, H. M. *et al.* National variation in pulmonary metastasectomy for colorectal cancer. *Colorectal Disease* **23**, 1306-1316 (2021).
- 22 Taylor, J. C. *et al.* Addressing the variation in adjuvant chemotherapy treatment for colorectal cancer: Can a regional intervention promote national change? *International Journal of Cancer* **148**, 845-856 (2021).
- 23 Bharathan, B. *et al.* Impact of deprivation on short- and long-term outcomes after colorectal cancer surgery. *British Journal of Surgery* **98**, 854-865 (2011).
- 24 Harris, A. R. *et al.* Socioeconomic deprivation adversely affects survival of patients with rectal cancer. (2009).
- 25 Raine, R. *et al.* Social variations in access to hospital care for patients with colorectal, breast, and lung cancer between 1999 and 2006: retrospective analysis of hospital episode statistics. *BMJ* **340**, b5479 (2010).
- 26 Redaniel, M., Martin, R., Blazeby, J., Wade, J. & Jeffreys, M. The association of time between diagnosis and major resection with poorer colorectal cancer survival: a retrospective cohort study. *BMC Cancer* **14** (2014).
- 27 Smith, J. J. *et al.* Social deprivation and outcomes in colorectal cancer. *British Journal of Surgery* **93**, 1123-1131 (2006).
- 28 Tilney, H. S. *et al.* A National Perspective on the Decline of Abdominoperineal Resection for Rectal Cancer. *Annals of Surgery* **247** (2008).
- 29 Tilney, H. *et al.* The National Bowel Cancer Project: Social Deprivation Is an Independent Predictor of Nonrestorative Rectal Cancer Surgery. *Diseases of the Colon & Rectum* **52** (2009).
- 30 Hassan, S., Miles, A., Rachet, B. & Morris, M. Variations in the Type of Adjuvant Chemotherapy Among Stage III Colon Cancer Patients in England. *Journal of Gastrointestinal Cancer* (2023).
- 31 Saito, M. K. *Socioeconomic inequalities in colorectal cancer survival in England and Japan* PhD thesis, London School of Hygiene & Tropical Medicine, (2019).
- 32 Benitez Majano, S. *et al.* Mental Health Morbidities and Time to Cancer Diagnosis Among Adults With Colon Cancer in England. *JAMA Network Open* **5**, e2238569-e2238569 (2022).
- 33 Majano, S. B., Lyratzopoulos, G., Rachet, B., de Wit, N. J. & Renzi, C. Do presenting symptoms, use of pre-diagnostic endoscopy and risk of emergency cancer diagnosis vary by comorbidity burden and type in patients with colorectal cancer? *British Journal of Cancer* **126**, 652-663 (2022).
- 34 Campbell, N. C. *et al.* Impact of deprivation and rural residence on treatment of colorectal and lung cancer. *British Journal of Cancer* **87**, 585-590 (2002).

- 35 Hole, D. & McArdle, C. Impact of socioeconomic deprivation on outcome after surgery for colorectal cancer. *Br J Surgery* **89**, 586-590 (2002).
- 36 McLeod, A. Variation in the provision of chemotherapy for colorectal cancer. *Journal of Epidemiology and Community Health* **53**, 775 (1999).
- 37 Paterson, H. M., Mander, B. J., Muir, P., Phillips, H. A. & Wild, S. H. Deprivation and access to treatment for colorectal cancer in southeast Scotland 2003–2009. *Colorectal Disease* **16**, O51-O57 (2014).
- 38 Nicholson, G. A. *et al.* Quality of care in rectal cancer surgery. Exploring influencing factors in the West of Scotland. *Colorectal Disease* **14**, 731-739 (2012).
- 39 Pitchforth, E., Russell, E. & Van der Pol, M. Access to specialist cancer care: is it equitable? *British Journal of Cancer* **87**, 1221-1226 (2002).
- 40 Radwan, R. *et al.* Social deprivation in patients requiring pelvic exenterative surgery. *Colorectal Disease* **18**, 684-687 (2016).
- 41 Haddaway, N., Grainger, M. & Gray, C. *citation chaser: An R package and Shiny app for forward and backward citations chasing in academic searching.*, <https://estech.shinyapps.io/citationchaser/> (2021).
- 42 EndNote v. EndNote X9 (Clarivate, Philadelphia, PA, 2013).
- 43 Afshar, N., English, D. & Milne, R. Explaining Socio-Economic Inequalities in Cancer Survival: A Systematic Review. *Cancer Control* **28** (2021).
- 44 Woods, L. M., Rachet, B. & Coleman, M. P. Origins of socio-economic inequalities in cancer survival: a review. *Annals of Oncology* **17**, 5-19 (2006).
- 45 Ayiku, L. *et al.* The medline UK filter: development and validation of a geographic search filter to retrieve research about the UK from OVID medline. *Health Information & Libraries Journal* **34**, 200-216 (2017).
- 46 Ayiku, L. *et al.* The Embase UK filter: validation of a geographic search filter to retrieve research about the UK from OVID Embase. *Health Information & Libraries Journal* **36**, 121-133 (2019).
- 47 McGowan, J. *et al.* PRESS Peer Review of Electronic Search Strategies: 2015 Guideline Statement. *Journal of Clinical Epidemiology* **75**, 40-46 (2016).
- 48 Forrest, L. F., Adams, J., Wareham, H., Rubin, G. & White, M. Socioeconomic Inequalities in Lung Cancer Treatment: Systematic Review and Meta-Analysis. *PLOS Medicine* **10**, e1001376 (2013).
- 49 Forrest, L. F., Sowden, S., Rubin, G., White, M. & Adams, J. Socio-economic inequalities in stage at diagnosis, and in time intervals on the lung cancer pathway from first symptom to treatment: systematic review and meta-analysis. *Thorax* **72**, 430 (2017).
- 50 Prady, S. L., Uphoff, E. P., Power, M. & Golder, S. Development and validation of a search filter to identify equity-focused studies: reducing the number needed to screen. *BMC medical research methodology* **18**, 106-106 (2018).
- 51 Public Health England Knowledge and Library Services. *Finding the Evidence: Health inequalities, equality and diversity*, <https://cash.libraryservices.nhs.uk/search/?q=finding+the+evidence> Accessed March 2023, (2016).
- 52 Hosking, J., Macmillan, A., Jones, R., Ameratunga, S. & Woodward, A. Searching for health equity: validation of a search filter for ethnic and socioeconomic inequalities in transport. *Systematic reviews* **8**, 94-94 (2019).

- 53 Grossetta Nardini, H. & Wang, L. *The Yale MeSH Analyzer* <http://mesh.med.yale.edu/> Accessed August 2022, (2022).
- 54 Phillips, A. *et al.* Socioeconomic differences impact overall survival in advanced ovarian cancer (AOC) prior to achievement of standard therapy. *Archives of Gynecology and Obstetrics* **300**, 1261-1270 (2019).
- 55 Vallance, A. E. *et al.* Role of Emergency Laparoscopic Colectomy for Colorectal Cancer: A Population-based Study in England. *Ann Surg.* **270**, 172-179 (2019).
- 56 Byrne, B. E., Vincent, C. A. & Faiz, O. D. Inequalities in Implementation and Different Outcomes During the Growth of Laparoscopic Colorectal Cancer Surgery in England: A National Population-Based Study from 2002 to 2012. *World Journal of Surgery* **42**, 3422-3431 (2018).
- 57 Walter, F. M. *et al.* Symptoms and patient factors associated with longer time to diagnosis for colorectal cancer: results from a prospective cohort study. *British journal of cancer* **115**, 533-541 (2016).
- 58 Wiggans, M. G., Shahtahmassebi, G., Aroori, S., Bowles, M. J. & Stell, D. A. Socioeconomic status influences the likelihood but not the outcome of liver resection for colorectal liver metastasis. *HPB* **17**, 150-158 (2015).
- 59 Warwick, J. *et al.* Variation in colorectal cancer treatment and survival: a cohort study covering the East Anglia region. *Colorectal Disease* **15**, 1243-1252 (2013).
- 60 Oliphant, R. *et al.* Deprivation and Colorectal Cancer Surgery: Longer-Term Survival Inequalities are Due to Differential Postoperative Mortality Between Socioeconomic Groups. *Annals of Surgical Oncology* **20**, 2132-2139 (2013).
- 61 Askari, A. *et al.* The relationship between ethnicity, social deprivation and late presentation of colorectal cancer. In: Vol. 47 88-93 (Cancer Epidemiology, 2017).
- 62 Taylor, E. F. *et al.* Population-based study of laparoscopic colorectal cancer surgery 2006-2008. *The British journal of surgery* **100**, 553-560 (2013).
- 63 Bramer, W. M., Giustini, D., de Jonge, G. B., Holland, L. & Bekhuis, T. De-duplication of database search results for systematic reviews in EndNote. *Journal of the Medical Library Association : JMLA* **104**, 240-243 (2016).
- 64 Veritas Health Innovation Melbourne Australia. *Covidence systematic review software*, [www.covidence.org](http://www.covidence.org). (2021).
- 65 Review Manager (RevMan) [Computer Program]. Version 5.4. (2020).
